# Supplementary material
Source: publisher site journal article supplement (https://www.spandidos-publications.com/2180/downloadSupplementary)
Supplement: Supplementary file 1 [file downloadSupplementary]

## Sheet: datKME-PANC1-5modules
Table SI. Genes in the WGCNA modules of MiaPACA2 and PANC1 cells.
Genes	kMEblack	kMEturquoise	kMEpink	kMEblue	kMEbrown	data$gene_short_name	moduleColors
ENSG00000000419	0.0294607	0.789095	0.140777	-0.708338	-0.797118	DPM1	turquoise
ENSG00000001084	0.575191	0.972801	-0.34861	-0.978624	-0.584779	GCLC	turquoise
ENSG00000001561	0.443025	0.902675	-0.197582	-0.874844	-0.605823	ENPP4	turquoise
ENSG00000001630	0.437427	0.981313	-0.211133	-0.948835	-0.697562	CYP51A1	turquoise
ENSG00000002586	0.0595849	0.700693	0.0516474	-0.639776	-0.674286	CD99	turquoise
ENSG00000002834	0.6736	0.833352	-0.54477	-0.914114	-0.369912	LASP1	turquoise
ENSG00000003137	0.447094	0.492614	-0.354906	-0.501786	-0.192059	CYP26B1	turquoise
ENSG00000003147	0.470124	0.881982	-0.286739	-0.871519	-0.567771	ICA1	turquoise
ENSG00000003249	0.293062	0.913231	-0.0722987	-0.877643	-0.73264	DBNDD1	turquoise
ENSG00000003436	0.00422934	0.195546	0.0173751	-0.0947555	-0.212703	TFPI	turquoise
ENSG00000004059	0.0901793	0.697129	0.0552264	-0.653723	-0.655746	ARF5	turquoise
ENSG00000004660	0.117254	0.894728	0.0891231	-0.851804	-0.844987	CAMKK1	turquoise
ENSG00000004975	0.619929	0.69165	-0.514867	-0.778949	-0.269042	DVL2	turquoise
ENSG00000005001	0.0632105	0.612026	0.117775	-0.492811	-0.590034	PRSS22	turquoise
ENSG00000005238	0.518449	0.957075	-0.314439	-0.941044	-0.610776	FAM214B	turquoise
ENSG00000005513	0.29953	0.867761	-0.125239	-0.867296	-0.685555	SOX8	turquoise
ENSG00000005700	0.66355	0.929074	-0.468365	-0.967868	-0.473584	IBTK	turquoise
ENSG00000006015	0.0942587	0.744662	0.0724625	-0.701841	-0.704156	C19orf60	turquoise
ENSG00000006025	0.610031	0.796622	-0.427817	-0.833841	-0.370253	OSBPL7	turquoise
ENSG00000006194	0.178892	0.65669	-0.059836	-0.675765	-0.564635	ZNF263	turquoise
ENSG00000006282	0.230213	0.847693	-0.053357	-0.822456	-0.718741	SPATA20	turquoise
ENSG00000006451	0.351775	0.933678	-0.117276	-0.904516	-0.709431	RALA	turquoise
ENSG00000006453	0.80221	0.771946	-0.624626	-0.818295	-0.206288	BAIAP2L1	turquoise
ENSG00000006459	0.50799	0.590826	-0.356447	-0.578912	-0.233719	KDM7A	turquoise
ENSG00000006534	0.444517	0.952484	-0.243607	-0.963089	-0.667403	ALDH3B1	turquoise
ENSG00000006652	0.513236	0.956807	-0.301348	-0.983109	-0.618066	IFRD1	turquoise
ENSG00000006704	0.107626	0.889083	0.123642	-0.821543	-0.8464	GTF2IRD1	turquoise
ENSG00000007255	0.216644	0.950706	-0.00314554	-0.901948	-0.8341	TRAPPC6A	turquoise
ENSG00000007384	0.204142	0.842131	-0.0267311	-0.799405	-0.731349	RHBDF1	turquoise
ENSG00000007516	0.292262	0.830415	-0.156119	-0.833901	-0.656517	BAIAP3	turquoise
ENSG00000007520	-0.216146	0.672351	0.460378	-0.512914	-0.849968	TSR3	turquoise
ENSG00000008130	0.500497	0.582133	-0.406605	-0.651917	-0.232271	NADK	turquoise
ENSG00000008300	0.634544	0.827462	-0.471566	-0.861593	-0.382274	CELSR3	turquoise
ENSG00000008394	0.289058	0.804201	-0.167443	-0.809079	-0.629187	MGST1	turquoise
ENSG00000008710	0.457443	0.927181	-0.220531	-0.90331	-0.623549	PKD1	turquoise
ENSG00000008735	0.00827875	0.727611	0.263118	-0.62903	-0.741813	MAPK8IP2	turquoise
ENSG00000009780	0.2708	0.912996	-0.0412553	-0.863825	-0.751296	FAM76A	turquoise
ENSG00000009950	0.267976	0.875969	-0.0970855	-0.853057	-0.714144	MLXIPL	turquoise
ENSG00000010219	0.131363	0.819257	0.0468333	-0.779229	-0.763756	DYRK4	turquoise
ENSG00000010278	0.473591	0.937631	-0.257222	-0.904939	-0.627582	CD9	turquoise
ENSG00000010322	0.450704	0.330092	-0.439856	-0.431645	-0.0245377	NISCH	turquoise
ENSG00000010404	0.589634	0.386124	-0.531028	-0.384895	0.0356837	IDS	turquoise
ENSG00000010803	0.534757	0.624985	-0.421019	-0.645224	-0.261577	SCMH1	turquoise
ENSG00000010810	0.202074	0.942366	0.0441675	-0.882111	-0.828724	FYN	turquoise
ENSG00000011021	0.639068	0.908097	-0.459615	-0.948927	-0.475581	CLCN6	turquoise
ENSG00000011295	0.294945	0.84808	-0.11643	-0.789578	-0.66018	TTC19	turquoise
ENSG00000011347	0.539589	0.869197	-0.324108	-0.878642	-0.508211	SYT7	turquoise
ENSG00000011478	0.00645405	0.716799	0.111271	-0.643359	-0.748651	QPCTL	turquoise
ENSG00000011638	0.230902	0.776349	-0.0423822	-0.733202	-0.631559	TMEM159	turquoise
ENSG00000012061	-0.280444	0.489495	0.370141	-0.335505	-0.720616	ERCC1	turquoise
ENSG00000012171	0.514226	0.800312	-0.40303	-0.857434	-0.453156	SEMA3B	turquoise
ENSG00000012822	0.561897	0.945504	-0.350386	-0.959357	-0.569593	CALCOCO1	turquoise
ENSG00000013441	0.121837	0.834604	0.0525165	-0.781161	-0.780434	CLK1	turquoise
ENSG00000013561	0.410343	0.953182	-0.192766	-0.941262	-0.692213	RNF14	turquoise
ENSG00000013563	0.492863	0.797331	-0.327094	-0.773876	-0.465678	DNASE1L1	turquoise
ENSG00000014824	0.740527	0.747092	-0.608057	-0.814328	-0.235602	SLC30A9	turquoise
ENSG00000014914	0.48677	0.919154	-0.310921	-0.941987	-0.599716	MTMR11	turquoise
ENSG00000019485	0.197974	0.685033	0.0372688	-0.626354	-0.551528	PRDM11	turquoise
ENSG00000019995	0.651462	0.71575	-0.460535	-0.766537	-0.258205	ZRANB1	turquoise
ENSG00000021300	0.10885	0.822565	0.13233	-0.752811	-0.779729	PLEKHB1	turquoise
ENSG00000022277	0.51904	0.745265	-0.39603	-0.755186	-0.383489	RTFDC1	turquoise
ENSG00000023041	0.513718	0.665943	-0.361681	-0.729748	-0.327764	ZDHHC6	turquoise
ENSG00000023330	0.315029	0.943275	-0.0895498	-0.891148	-0.744709	ALAS1	turquoise
ENSG00000023572	0.185371	0.776304	-0.000922198	-0.687139	-0.661547	GLRX2	turquoise
ENSG00000023734	-0.296788	0.595876	0.452451	-0.48708	-0.845574	STRAP	turquoise
ENSG00000023909	0.538746	0.857585	-0.425477	-0.889448	-0.496309	GCLM	turquoise
ENSG00000024048	0.709592	0.641076	-0.602729	-0.76992	-0.142636	UBR2	turquoise
ENSG00000024422	0.598201	0.727088	-0.499231	-0.75495	-0.318739	EHD2	turquoise
ENSG00000024862	0.195237	0.920041	-0.000520595	-0.881659	-0.815717	CCDC28A	turquoise
ENSG00000025708	0.225165	0.921459	0.0413185	-0.850999	-0.785382	TYMP	turquoise
ENSG00000027697	0.572759	0.825193	-0.38768	-0.837353	-0.426614	IFNGR1	turquoise
ENSG00000027847	0.0353212	0.725735	0.139214	-0.627624	-0.725765	B4GALT7	turquoise
ENSG00000030582	0.422622	0.946606	-0.237672	-0.946154	-0.679504	GRN	turquoise
ENSG00000031698	0.442403	0.985861	-0.225251	-0.979268	-0.697327	SARS	turquoise
ENSG00000033100	0.201583	0.716291	-0.0211481	-0.61689	-0.601079	CHPF2	turquoise
ENSG00000033327	0.670902	0.728446	-0.472118	-0.753386	-0.261317	GAB2	turquoise
ENSG00000034510	0.256066	0.847696	-0.0694794	-0.768684	-0.690773	TMSB10	turquoise
ENSG00000034713	0.0567018	0.819843	0.132208	-0.733776	-0.802752	GABARAPL2	turquoise
ENSG00000035115	0.185874	0.820096	0.0210341	-0.789573	-0.707042	SH3YL1	turquoise
ENSG00000035862	0.497003	0.853911	-0.391023	-0.872654	-0.525953	TIMP2	turquoise
ENSG00000036054	0.565893	0.906221	-0.355375	-0.928581	-0.531597	TBC1D23	turquoise
ENSG00000037042	0.655013	0.525196	-0.57226	-0.610336	-0.0602408	TUBG2	turquoise
ENSG00000037637	0.429323	0.962034	-0.228808	-0.954177	-0.682643	FBXO42	turquoise
ENSG00000038002	0.18263	0.771812	0.0174545	-0.757774	-0.665096	AGA	turquoise
ENSG00000038210	0.464895	0.699848	-0.322135	-0.675929	-0.378057	PI4K2B	turquoise
ENSG00000039068	0.549394	0.719446	-0.415374	-0.804806	-0.348663	CDH1	turquoise
ENSG00000040487	-0.0808647	0.703312	0.311441	-0.608905	-0.784879	PQLC2	turquoise
ENSG00000040608	0.338896	0.9801	-0.0891478	-0.935984	-0.768081	RTN4R	turquoise
ENSG00000041880	0.282917	0.846709	-0.113985	-0.83227	-0.679792	PARP3	turquoise
ENSG00000042286	0.125501	0.855387	0.0802359	-0.783867	-0.795525	AIFM2	turquoise
ENSG00000042445	0.640523	0.835309	-0.490833	-0.888326	-0.401849	RETSAT	turquoise
ENSG00000042493	0.427657	0.993142	-0.208182	-0.972159	-0.718313	CAPG	turquoise
ENSG00000044090	0.690653	0.835392	-0.524363	-0.878673	-0.354719	CUL7	turquoise
ENSG00000044115	0.602605	0.825801	-0.455456	-0.867652	-0.421683	CTNNA1	turquoise
ENSG00000044574	0.413545	0.993455	-0.192972	-0.963526	-0.729213	HSPA5	turquoise
ENSG00000047346	-0.00167143	0.749574	0.204939	-0.684411	-0.787359	FAM214A	turquoise
ENSG00000048405	0.632784	0.419139	-0.53726	-0.510232	0.0230545	ZNF800	turquoise
ENSG00000048544	0.489948	0.954231	-0.272905	-0.944714	-0.629591	MRPS10	turquoise
ENSG00000049239	0.687185	0.880354	-0.518147	-0.923014	-0.414994	H6PD	turquoise
ENSG00000049449	0.545528	0.836016	-0.385917	-0.8669	-0.459867	RCN1	turquoise
ENSG00000050405	0.58398	0.917185	-0.405817	-0.949538	-0.525894	LIMA1	turquoise
ENSG00000050426	0.44599	0.583632	-0.32363	-0.664395	-0.276885	LETMD1	turquoise
ENSG00000051009	0.295659	0.861268	-0.0840921	-0.837302	-0.685119	FAM160A2	turquoise
ENSG00000051108	0.417223	0.967009	-0.209829	-0.939683	-0.70014	HERPUD1	turquoise
ENSG00000051620	0.220519	0.894718	0.0176842	-0.793692	-0.761717	HEBP2	turquoise
ENSG00000052749	0.34603	0.828987	-0.152701	-0.782965	-0.609141	RRP12	turquoise
ENSG00000052802	0.462326	0.977282	-0.237302	-0.944904	-0.673444	MSMO1	turquoise
ENSG00000052841	0.546596	0.752368	-0.37704	-0.808562	-0.382804	TTC17	turquoise
ENSG00000053501	-0.370877	0.453428	0.491192	-0.337535	-0.739943	USE1	turquoise
ENSG00000053747	0.607682	0.695364	-0.414451	-0.744324	-0.27025	LAMA3	turquoise
ENSG00000054611	0.235221	0.862537	-0.0130821	-0.817074	-0.721428	TBC1D22A	turquoise
ENSG00000054793	0.757639	0.890837	-0.574484	-0.962255	-0.365083	ATP9A	turquoise
ENSG00000054983	0.553979	0.660498	-0.42545	-0.745921	-0.280471	GALC	turquoise
ENSG00000055211	0.300801	0.789789	-0.155183	-0.778499	-0.602823	GINM1	turquoise
ENSG00000056558	0.403777	0.558534	-0.232285	-0.515215	-0.260647	TRAF1	turquoise
ENSG00000056972	0.422469	0.780291	-0.222954	-0.817817	-0.501806	TRAF3IP2	turquoise
ENSG00000057935	-0.0707543	0.368759	0.149973	-0.353934	-0.456142	MTA3	turquoise
ENSG00000058668	0.715041	0.862755	-0.553875	-0.923386	-0.366409	ATP2B4	turquoise
ENSG00000059122	0.175604	0.887689	0.0273347	-0.820433	-0.793574	FLYWCH1	turquoise
ENSG00000059728	0.391693	0.939936	-0.174703	-0.926938	-0.69496	MXD1	turquoise
ENSG00000060762	0.236905	0.947906	-0.00304741	-0.871665	-0.809113	MPC1	turquoise
ENSG00000060982	0.707322	0.622749	-0.560815	-0.660516	-0.121234	BCAT1	turquoise
ENSG00000061676	0.506702	0.9099	-0.296983	-0.910939	-0.573998	NCKAP1	turquoise
ENSG00000063046	0.602406	0.853421	-0.43129	-0.920639	-0.436674	EIF4B	turquoise
ENSG00000063180	0.412414	0.671971	-0.297692	-0.696379	-0.390197	CA11	turquoise
ENSG00000063587	0.530468	0.643231	-0.416121	-0.645448	-0.28668	ZNF275	turquoise
ENSG00000063660	0.612943	0.923855	-0.404867	-0.932797	-0.505693	GPC1	turquoise
ENSG00000064300	0.328606	0.975979	-0.0974912	-0.949133	-0.77095	NGFR	turquoise
ENSG00000064547	0.383468	0.917679	-0.170112	-0.898142	-0.665061	LPAR2	turquoise
ENSG00000064787	0.491831	0.943151	-0.295214	-0.958455	-0.624816	BCAS1	turquoise
ENSG00000065054	0.186913	0.838934	0.036165	-0.805747	-0.736861	SLC9A3R2	turquoise
ENSG00000065060	0.760101	0.66853	-0.652843	-0.800212	-0.135412	UHRF1BP1	turquoise
ENSG00000065357	0.535706	0.858607	-0.379559	-0.851947	-0.491569	DGKA	turquoise
ENSG00000065485	0.576561	0.69615	-0.455104	-0.701744	-0.290956	PDIA5	turquoise
ENSG00000065613	0.682969	0.906466	-0.509977	-0.94855	-0.436038	SLK	turquoise
ENSG00000065621	-0.0938626	0.724198	0.322898	-0.625193	-0.813203	GSTO2	turquoise
ENSG00000065802	0.156922	0.921389	0.0927704	-0.845392	-0.845151	ASB1	turquoise
ENSG00000065833	0.440395	0.997064	-0.215838	-0.977833	-0.711225	ME1	turquoise
ENSG00000065883	0.719873	0.537279	-0.571019	-0.572587	-0.0214813	CDK13	turquoise
ENSG00000065911	0.586826	0.969918	-0.372868	-0.989142	-0.575198	MTHFD2	turquoise
ENSG00000065970	0.611985	0.759637	-0.488379	-0.832993	-0.34577	FOXJ2	turquoise
ENSG00000066135	0.472762	0.561857	-0.38177	-0.623463	-0.225144	KDM4A	turquoise
ENSG00000066230	0.514126	0.850617	-0.344004	-0.903088	-0.506749	SLC9A3	turquoise
ENSG00000066248	0.496823	0.732616	-0.369556	-0.712023	-0.388604	NGEF	turquoise
ENSG00000066322	0.687266	0.787633	-0.531357	-0.817777	-0.308417	ELOVL1	turquoise
ENSG00000066422	0.745519	0.703531	-0.597529	-0.759289	-0.187135	ZBTB11	turquoise
ENSG00000066455	0.44817	0.913584	-0.233569	-0.899446	-0.608658	GOLGA5	turquoise
ENSG00000066855	0.663437	0.760708	-0.501577	-0.813839	-0.296618	MTFR1	turquoise
ENSG00000066926	0.424028	0.62833	-0.322786	-0.667619	-0.349908	FECH	turquoise
ENSG00000067064	0.3698	0.969837	-0.13557	-0.916919	-0.732872	IDI1	turquoise
ENSG00000067082	0.758858	0.88218	-0.581912	-0.937636	-0.356192	KLF6	turquoise
ENSG00000067113	0.330477	0.858499	-0.111336	-0.856886	-0.649	PPAP2A	turquoise
ENSG00000067177	0.722982	0.643309	-0.569847	-0.719211	-0.137154	PHKA1	turquoise
ENSG00000067560	0.545934	0.983869	-0.332385	-0.987537	-0.620486	RHOA	turquoise
ENSG00000067715	0.681893	0.849503	-0.497878	-0.894367	-0.379067	SYT1	turquoise
ENSG00000067829	-0.45137	0.41668	0.573684	-0.265419	-0.773952	IDH3G	turquoise
ENSG00000067836	0.262722	0.770742	-0.0819691	-0.764491	-0.598402	ROGDI	turquoise
ENSG00000068079	-0.0701279	0.612919	0.291139	-0.541258	-0.679317	IFI35	turquoise
ENSG00000068323	0.562003	0.885455	-0.397322	-0.901967	-0.499149	TFE3	turquoise
ENSG00000068354	0.611682	0.824911	-0.429387	-0.869255	-0.406456	TBC1D25	turquoise
ENSG00000068366	0.670506	0.589135	-0.56049	-0.619202	-0.116067	ACSL4	turquoise
ENSG00000068697	0.568251	0.93333	-0.380396	-0.954353	-0.555791	LAPTM4A	turquoise
ENSG00000068724	0.502369	0.860331	-0.330841	-0.886831	-0.530341	TTC7A	turquoise
ENSG00000068745	0.121637	0.810623	0.0382863	-0.793887	-0.755717	IP6K2	turquoise
ENSG00000068878	-0.176621	0.502669	0.389508	-0.42162	-0.650607	PSME4	turquoise
ENSG00000068903	0.56223	0.976024	-0.352276	-0.988852	-0.600146	SIRT2	turquoise
ENSG00000068912	0.637304	0.907048	-0.429213	-0.920231	-0.471991	ERLEC1	turquoise
ENSG00000068971	0.527314	0.931555	-0.319198	-0.914643	-0.577395	PPP2R5B	turquoise
ENSG00000069812	0.0636565	0.50582	0.067327	-0.400776	-0.483467	HES2	turquoise
ENSG00000069956	0.745449	0.769638	-0.561003	-0.839674	-0.25708	MAPK6	turquoise
ENSG00000069966	0.428914	0.828402	-0.20166	-0.795199	-0.545019	GNB5	turquoise
ENSG00000070061	-0.417671	0.394725	0.542358	-0.264784	-0.719335	IKBKAP	turquoise
ENSG00000070404	0.108884	0.85932	0.112444	-0.755719	-0.808127	FSTL3	turquoise
ENSG00000070444	0.778858	0.80173	-0.617712	-0.873389	-0.256131	MNT	turquoise
ENSG00000070476	0.445189	0.865067	-0.278806	-0.872176	-0.558734	ZXDC	turquoise
ENSG00000070540	0.47661	0.891353	-0.305584	-0.893867	-0.57319	WIPI1	turquoise
ENSG00000070610	0.417782	0.681902	-0.276324	-0.670311	-0.402799	GBA2	turquoise
ENSG00000070669	0.396667	0.991995	-0.175202	-0.966311	-0.739727	ASNS	turquoise
ENSG00000070731	0.662318	0.822751	-0.475332	-0.859358	-0.358592	ST6GALNAC2	turquoise
ENSG00000070778	0.522086	0.905076	-0.345537	-0.922648	-0.552472	PTPN21	turquoise
ENSG00000070831	0.447797	0.917321	-0.234404	-0.890298	-0.619062	CDC42	turquoise
ENSG00000071051	0.509281	0.864156	-0.342897	-0.859817	-0.527949	NCK2	turquoise
ENSG00000071082	0.0865219	0.848599	0.0853717	-0.816482	-0.820831	RPL31	turquoise
ENSG00000071242	0.58286	0.930181	-0.381852	-0.937148	-0.537342	RPS6KA2	turquoise
ENSG00000071246	0.248204	0.73322	-0.0908267	-0.690263	-0.563441	VASH1	turquoise
ENSG00000071553	0.486289	0.949237	-0.258278	-0.919235	-0.624897	ATP6AP1	turquoise
ENSG00000071859	0.149584	0.888202	0.0497751	-0.808672	-0.806195	FAM50A	turquoise
ENSG00000071889	0.206774	0.893276	0.0173287	-0.819067	-0.774274	FAM3A	turquoise
ENSG00000072042	0.625667	0.59009	-0.535311	-0.621717	-0.146204	RDH11	turquoise
ENSG00000072163	0.40095	0.934633	-0.236442	-0.939825	-0.677932	LIMS2	turquoise
ENSG00000072210	0.522916	0.848368	-0.36656	-0.87852	-0.508692	ALDH3A2	turquoise
ENSG00000072609	0.317913	0.88664	-0.121258	-0.844661	-0.687334	CHFR	turquoise
ENSG00000072849	-0.469275	0.307278	0.544463	-0.153908	-0.664945	DERL2	turquoise
ENSG00000073150	0.3653	0.940672	-0.197257	-0.927446	-0.71218	PANX2	turquoise
ENSG00000073350	0.240158	0.912456	-0.0216511	-0.881761	-0.774454	LLGL2	turquoise
ENSG00000073670	-0.0979401	0.0809821	0.0724577	-0.0523983	-0.161648	ADAM11	turquoise
ENSG00000074211	0.564771	0.66284	-0.417364	-0.691559	-0.259627	PPP2R2C	turquoise
ENSG00000074319	0.675909	0.823797	-0.462744	-0.865127	-0.348708	TSG101	turquoise
ENSG00000074370	0.324654	0.767548	-0.187777	-0.748953	-0.566253	ATP2A3	turquoise
ENSG00000074416	0.486112	0.600313	-0.31828	-0.578438	-0.270097	MGLL	turquoise
ENSG00000074527	0.534063	0.959366	-0.311538	-0.940683	-0.60331	NTN4	turquoise
ENSG00000074855	0.667171	0.823259	-0.50028	-0.878894	-0.355231	ANO8	turquoise
ENSG00000074964	0.275237	0.888886	-0.0494463	-0.853402	-0.7236	ARHGEF10L	turquoise
ENSG00000075142	-0.21544	0.592824	0.403114	-0.486294	-0.777313	SRI	turquoise
ENSG00000075240	0.657416	0.651316	-0.55126	-0.726436	-0.191114	GRAMD4	turquoise
ENSG00000075399	0.0189075	0.666114	0.168121	-0.569578	-0.681131	VPS9D1	turquoise
ENSG00000075426	0.591176	0.714308	-0.472619	-0.795415	-0.311325	FOSL2	turquoise
ENSG00000075618	0.483493	0.669409	-0.298383	-0.643256	-0.338773	FSCN1	turquoise
ENSG00000075643	0.388987	0.908989	-0.19317	-0.899725	-0.653919	MOCOS	turquoise
ENSG00000075945	0.318875	0.939691	-0.108216	-0.918711	-0.74269	KIFAP3	turquoise
ENSG00000075975	0.611483	0.765618	-0.482935	-0.800345	-0.345624	MKRN2	turquoise
ENSG00000076043	0.015178	0.728627	0.214921	-0.624671	-0.740869	REXO2	turquoise
ENSG00000076344	0.41518	0.963073	-0.180651	-0.931285	-0.689965	RGS11	turquoise
ENSG00000076864	0.520049	0.983551	-0.297551	-0.986435	-0.637318	RAP1GAP	turquoise
ENSG00000077380	0.20479	0.617725	-0.0336519	-0.564067	-0.490325	DYNC1I2	turquoise
ENSG00000077463	-0.228759	0.695666	0.422692	-0.560333	-0.895133	SIRT6	turquoise
ENSG00000077713	0.605686	0.566918	-0.492302	-0.622086	-0.127092	SLC25A43	turquoise
ENSG00000077721	0.52386	0.848617	-0.338426	-0.856094	-0.493774	UBE2A	turquoise
ENSG00000078081	0.462245	0.951561	-0.230059	-0.926506	-0.64271	LAMP3	turquoise
ENSG00000078114	0.647877	0.94407	-0.456208	-0.979645	-0.504738	NEBL	turquoise
ENSG00000078246	0.738563	0.567785	-0.65284	-0.675505	-0.0490424	TULP3	turquoise
ENSG00000078804	0.586417	0.969416	-0.380687	-0.983645	-0.572723	TP53INP2	turquoise
ENSG00000078902	0.211965	0.913113	0.0480437	-0.853448	-0.792468	TOLLIP	turquoise
ENSG00000078967	-0.0611882	0.728279	0.272829	-0.615221	-0.806934	UBE2D4	turquoise
ENSG00000079432	0.0172427	0.761086	0.14909	-0.705763	-0.777936	CIC	turquoise
ENSG00000079459	0.344773	0.986967	-0.102807	-0.940359	-0.770443	FDFT1	turquoise
ENSG00000079462	-0.348638	0.272288	0.423579	-0.215678	-0.535694	PAFAH1B3	turquoise
ENSG00000079974	0.608137	0.744024	-0.430816	-0.765806	-0.329092	RABL2B	turquoise
ENSG00000080007	0.513882	0.861648	-0.275147	-0.84098	-0.507325	DDX43	turquoise
ENSG00000080031	0.541612	0.982714	-0.32537	-0.986461	-0.620541	PTPRH	turquoise
ENSG00000080561	0.783516	0.664036	-0.674211	-0.732154	-0.100938	MID2	turquoise
ENSG00000080815	0.627129	0.714049	-0.502461	-0.76911	-0.281132	PSEN1	turquoise
ENSG00000080845	0.644749	0.917554	-0.465081	-0.955493	-0.477006	DLGAP4	turquoise
ENSG00000081177	0.471074	0.781581	-0.313948	-0.820744	-0.466278	EXD2	turquoise
ENSG00000081181	0.471712	0.905819	-0.311802	-0.909272	-0.596352	ARG2	turquoise
ENSG00000081721	0.433832	0.625339	-0.290058	-0.597662	-0.319324	DUSP12	turquoise
ENSG00000081760	0.38772	0.988552	-0.165108	-0.954247	-0.743294	AACS	turquoise
ENSG00000081791	0.614903	0.602066	-0.52554	-0.703851	-0.175145	KIAA0141	turquoise
ENSG00000081923	0.580271	0.583724	-0.480591	-0.670309	-0.183867	ATP8B1	turquoise
ENSG00000082014	0.492668	0.628867	-0.386582	-0.723956	-0.297309	SMARCD3	turquoise
ENSG00000082068	-0.236761	0.553366	0.352142	-0.462992	-0.756858	WDR70	turquoise
ENSG00000082996	0.71882	0.83981	-0.528178	-0.892677	-0.346131	RNF13	turquoise
ENSG00000083290	0.680348	0.535336	-0.606903	-0.628845	-0.0721672	ULK2	turquoise
ENSG00000083520	0.530125	0.667526	-0.365156	-0.666291	-0.31167	DIS3	turquoise
ENSG00000083750	0.251819	0.840712	-0.0744845	-0.820176	-0.679949	RRAGB	turquoise
ENSG00000083937	0.259808	0.863402	-0.0744491	-0.840818	-0.716239	CHMP2B	turquoise
ENSG00000084733	0.741889	0.8726	-0.545727	-0.941973	-0.362096	RAB10	turquoise
ENSG00000084754	0.398881	0.950969	-0.189653	-0.946285	-0.69817	HADHA	turquoise
ENSG00000084764	0.388389	0.966328	-0.17789	-0.939242	-0.720629	MAPRE3	turquoise
ENSG00000085274	0.509398	0.892815	-0.286558	-0.903655	-0.550797	MYNN	turquoise
ENSG00000085365	0.769425	0.561208	-0.721382	-0.690639	-0.0149863	SCAMP1	turquoise
ENSG00000085491	0.29094	0.482192	-0.174529	-0.431967	-0.269816	SLC25A24	turquoise
ENSG00000085733	0.418576	0.897055	-0.165217	-0.842145	-0.62112	CTTN	turquoise
ENSG00000085831	0.37474	0.817137	-0.259212	-0.824553	-0.57699	TTC39A	turquoise
ENSG00000085982	0.718617	0.76122	-0.585417	-0.815683	-0.268034	USP40	turquoise
ENSG00000085998	-0.332119	0.454656	0.509116	-0.273704	-0.719177	POMGNT1	turquoise
ENSG00000086065	0.288681	0.808203	-0.094602	-0.754988	-0.617038	CHMP5	turquoise
ENSG00000086544	-0.0406656	0.773354	0.208057	-0.707017	-0.842294	ITPKC	turquoise
ENSG00000086666	0.712693	0.805639	-0.534133	-0.864088	-0.308782	ZFAND6	turquoise
ENSG00000086730	-0.0495255	0.580885	0.221623	-0.430956	-0.642672	LAT2	turquoise
ENSG00000087074	0.201537	0.966463	0.0233317	-0.901251	-0.858344	PPP1R15A	turquoise
ENSG00000087086	0.269586	0.970874	-0.0705432	-0.928811	-0.812118	FTL	turquoise
ENSG00000087266	0.671699	0.785087	-0.510156	-0.866953	-0.321908	SH3BP2	turquoise
ENSG00000087302	0.136591	0.855719	0.0214112	-0.793655	-0.793273	C14orf166	turquoise
ENSG00000087460	0.639837	0.732131	-0.498043	-0.744934	-0.288939	GNAS	turquoise
ENSG00000087842	0.213831	0.920419	0.00430693	-0.851371	-0.797827	PIR	turquoise
ENSG00000088179	0.716385	0.708881	-0.632851	-0.797073	-0.208136	PTPN4	turquoise
ENSG00000088280	0.510233	0.833701	-0.304143	-0.856355	-0.493718	ASAP3	turquoise
ENSG00000088826	-0.352676	0.215122	0.471852	-0.169111	-0.480993	SMOX	turquoise
ENSG00000088836	0.559594	0.712901	-0.392592	-0.750957	-0.330233	SLC4A11	turquoise
ENSG00000088854	0.423702	0.799223	-0.24063	-0.769112	-0.511016	C20orf194	turquoise
ENSG00000088899	0.448622	0.994428	-0.228654	-0.97869	-0.702561	LZTS3	turquoise
ENSG00000089063	0.47182	0.90754	-0.273384	-0.891866	-0.59336	TMEM230	turquoise
ENSG00000089157	0.777626	0.580147	-0.664526	-0.659734	-0.022652	RPLP0	turquoise
ENSG00000089177	0.512311	0.854917	-0.304868	-0.900431	-0.516122	KIF16B	turquoise
ENSG00000089199	0.263251	0.91412	-0.0115613	-0.858135	-0.763889	CHGB	turquoise
ENSG00000089248	0.0987448	0.80915	0.096163	-0.757973	-0.770054	ERP29	turquoise
ENSG00000089289	0.359987	0.875331	-0.166877	-0.895406	-0.641494	IGBP1	turquoise
ENSG00000089327	-0.184495	0.725965	0.373298	-0.573132	-0.891091	FXYD5	turquoise
ENSG00000089335	0.329615	0.706957	-0.169228	-0.702066	-0.477803	ZNF302	turquoise
ENSG00000089876	0.42594	0.778634	-0.221424	-0.712841	-0.489757	DHX32	turquoise
ENSG00000090006	0.0820596	0.876599	0.145555	-0.785298	-0.850973	LTBP4	turquoise
ENSG00000090013	0.216096	0.948028	-0.0246986	-0.905793	-0.82871	BLVRB	turquoise
ENSG00000090020	0.410264	0.978648	-0.179257	-0.947619	-0.711998	SLC9A1	turquoise
ENSG00000090097	0.45939	0.757921	-0.302029	-0.724195	-0.439031	PCBP4	turquoise
ENSG00000090266	-0.375302	0.608576	0.569181	-0.459142	-0.913718	NDUFB2	turquoise
ENSG00000090487	0.435215	0.653625	-0.256573	-0.676265	-0.340266	SPG21	turquoise
ENSG00000090581	0.493871	0.844809	-0.314347	-0.839648	-0.502957	GNPTG	turquoise
ENSG00000090615	0.70839	0.635594	-0.556138	-0.656729	-0.131268	GOLGA3	turquoise
ENSG00000090861	0.536621	0.816226	-0.403853	-0.882875	-0.453553	AARS	turquoise
ENSG00000090971	-0.0785982	0.831644	0.293726	-0.743164	-0.929264	NAT14	turquoise
ENSG00000091409	0.699888	0.707446	-0.543193	-0.7264	-0.216438	ITGA6	turquoise
ENSG00000091490	0.216812	0.763696	0.00623168	-0.683516	-0.639254	SEL1L3	turquoise
ENSG00000091640	0.0562274	0.772228	0.143482	-0.683825	-0.763608	SPAG7	turquoise
ENSG00000092330	-0.0138148	0.656529	0.267722	-0.542999	-0.681908	TINF2	turquoise
ENSG00000092621	0.285131	0.960652	-0.0345074	-0.913374	-0.785688	PHGDH	turquoise
ENSG00000092820	0.530817	0.98492	-0.325008	-0.989237	-0.633289	EZR	turquoise
ENSG00000092841	0.0819095	0.840976	0.159591	-0.743536	-0.809956	MYL6	turquoise
ENSG00000092964	0.549265	0.979991	-0.328524	-0.98188	-0.61092	DPYSL2	turquoise
ENSG00000093010	-0.219902	0.648304	0.389088	-0.537362	-0.843844	COMT	turquoise
ENSG00000093183	0.756711	0.682319	-0.606793	-0.770304	-0.144155	SEC22C	turquoise
ENSG00000094631	0.675344	0.800187	-0.496386	-0.850243	-0.333546	HDAC6	turquoise
ENSG00000094975	0.772004	0.825642	-0.609835	-0.879113	-0.285677	SUCO	turquoise
ENSG00000095370	0.44294	0.977928	-0.213955	-0.969778	-0.691544	SH2D3C	turquoise
ENSG00000095397	0.428461	0.666289	-0.255513	-0.711302	-0.374828	DFNB31	turquoise
ENSG00000095752	-0.0631672	0.588402	0.242509	-0.491065	-0.67312	IL11	turquoise
ENSG00000095906	-0.267221	0.497965	0.453981	-0.375838	-0.708493	NUBP2	turquoise
ENSG00000096093	0.140951	0.896041	0.0839719	-0.825923	-0.82845	EFHC1	turquoise
ENSG00000097033	0.692851	0.857194	-0.476381	-0.880911	-0.372073	SH3GLB1	turquoise
ENSG00000099194	0.837181	0.826805	-0.682477	-0.916501	-0.239251	SCD	turquoise
ENSG00000099326	0.593006	0.728805	-0.440542	-0.772654	-0.326573	MZF1	turquoise
ENSG00000099330	-0.0489519	0.803836	0.229706	-0.708216	-0.871436	OCEL1	turquoise
ENSG00000099337	0.479581	0.903845	-0.264796	-0.876013	-0.588426	KCNK6	turquoise
ENSG00000099365	0.545451	0.860146	-0.373939	-0.911833	-0.496117	STX1B	turquoise
ENSG00000099622	0.328499	0.803832	-0.22014	-0.824239	-0.59945	CIRBP	turquoise
ENSG00000099785	0.430352	0.876393	-0.218718	-0.833766	-0.591718	2020-03-02	turquoise
ENSG00000099812	0.322077	0.962167	-0.0993636	-0.934107	-0.761861	MISP	turquoise
ENSG00000099822	0.384794	0.919027	-0.209551	-0.88612	-0.670718	HCN2	turquoise
ENSG00000099840	0.346202	0.921396	-0.121158	-0.893391	-0.705708	IZUMO4	turquoise
ENSG00000099864	0.456177	0.853747	-0.336786	-0.880235	-0.548291	PALM	turquoise
ENSG00000099875	0.483602	0.981437	-0.277036	-0.987676	-0.662778	MKNK2	turquoise
ENSG00000099889	0.392058	0.986688	-0.158817	-0.957117	-0.738844	ARVCF	turquoise
ENSG00000099899	0.179433	0.812835	0.0148203	-0.744675	-0.718187	TRMT2A	turquoise
ENSG00000099904	0.715002	0.700349	-0.59594	-0.764075	-0.205801	ZDHHC8	turquoise
ENSG00000099999	0.0135627	0.752096	0.17373	-0.6295	-0.77194	RNF215	turquoise
ENSG00000100036	0.485521	0.778481	-0.303649	-0.787216	-0.448482	SLC35E4	turquoise
ENSG00000100075	0.247034	0.950753	-0.0422077	-0.898062	-0.805997	SLC25A1	turquoise
ENSG00000100100	0.567947	0.962517	-0.347274	-0.979893	-0.576445	PIK3IP1	turquoise
ENSG00000100129	0.438177	0.790018	-0.290944	-0.817518	-0.489276	EIF3L	turquoise
ENSG00000100139	0.547319	0.942374	-0.329074	-0.932926	-0.573366	MICALL1	turquoise
ENSG00000100196	0.504668	0.944961	-0.294496	-0.919891	-0.609912	KDELR3	turquoise
ENSG00000100211	-0.0420109	0.582354	0.170807	-0.531827	-0.649464	CBY1	turquoise
ENSG00000100219	0.435216	0.983934	-0.220715	-0.958139	-0.702872	XBP1	turquoise
ENSG00000100221	0.751968	0.781488	-0.60232	-0.846892	-0.261899	JOSD1	turquoise
ENSG00000100225	0.650634	0.889312	-0.464875	-0.924687	-0.435265	FBXO7	turquoise
ENSG00000100239	-0.0452332	0.668933	0.244025	-0.558993	-0.71562	PPP6R2	turquoise
ENSG00000100241	-0.264084	0.650596	0.484102	-0.4977	-0.86518	SBF1	turquoise
ENSG00000100243	0.530828	0.826288	-0.374982	-0.823489	-0.465976	CYB5R3	turquoise
ENSG00000100246	0.0364937	0.757	0.123847	-0.70882	-0.765834	DNAL4	turquoise
ENSG00000100258	0.383102	0.615432	-0.260276	-0.575378	-0.359898	LMF2	turquoise
ENSG00000100266	0.56721	0.919606	-0.34247	-0.902759	-0.532528	PACSIN2	turquoise
ENSG00000100271	0.353971	0.930415	-0.129171	-0.916325	-0.703488	TTLL1	turquoise
ENSG00000100276	0.3764	0.919171	-0.159466	-0.886616	-0.671982	RASL10A	turquoise
ENSG00000100284	0.357987	0.91145	-0.154549	-0.876538	-0.683868	TOM1	turquoise
ENSG00000100292	0.3524	0.98996	-0.114497	-0.949994	-0.766238	HMOX1	turquoise
ENSG00000100299	0.139182	0.924501	0.116412	-0.827672	-0.855367	ARSA	turquoise
ENSG00000100300	0.0635826	0.861481	0.150452	-0.788993	-0.842579	TSPO	turquoise
ENSG00000100330	0.665816	0.783491	-0.48585	-0.824066	-0.3218	MTMR3	turquoise
ENSG00000100364	-0.141135	0.47857	0.339229	-0.343314	-0.603483	KIAA0930	turquoise
ENSG00000100376	0.454902	0.747456	-0.307999	-0.745125	-0.437207	FAM118A	turquoise
ENSG00000100417	0.0944793	0.905078	0.115175	-0.825889	-0.865901	PMM1	turquoise
ENSG00000100429	0.18632	0.793084	-9.65395e-06	-0.763155	-0.692271	HDAC10	turquoise
ENSG00000100439	0.36264	0.911021	-0.188286	-0.883544	-0.684159	ABHD4	turquoise
ENSG00000100441	0.754394	0.594324	-0.697874	-0.682444	-0.0599006	KHNYN	turquoise
ENSG00000100445	-0.0210246	0.761747	0.213234	-0.662766	-0.815207	SDR39U1	turquoise
ENSG00000100554	0.0983858	0.722227	0.0887681	-0.6393	-0.684468	ATP6V1D	turquoise
ENSG00000100568	-0.466651	0.275982	0.57462	-0.181475	-0.619443	VTI1B	turquoise
ENSG00000100577	0.236054	0.934371	-0.0210313	-0.893686	-0.797041	GSTZ1	turquoise
ENSG00000100592	0.595017	0.793986	-0.404156	-0.812209	-0.38194	DAAM1	turquoise
ENSG00000100600	0.280422	0.899127	-0.0699468	-0.862228	-0.730588	LGMN	turquoise
ENSG00000100612	0.328769	0.928437	-0.125755	-0.90151	-0.725773	DHRS7	turquoise
ENSG00000100647	0.629712	0.731855	-0.420786	-0.769974	-0.29806	SUSD6	turquoise
ENSG00000100650	-0.0173612	0.508083	0.0909797	-0.477445	-0.55484	SRSF5	turquoise
ENSG00000100711	0.160333	0.870902	0.0633437	-0.810125	-0.795592	ZFYVE21	turquoise
ENSG00000100814	0.393323	0.955888	-0.194587	-0.94825	-0.703135	CCNB1IP1	turquoise
ENSG00000100889	0.44017	0.917908	-0.253767	-0.937937	-0.632078	PCK2	turquoise
ENSG00000100979	0.503433	0.93896	-0.326626	-0.941364	-0.601097	PLTP	turquoise
ENSG00000100994	0.439382	0.971709	-0.216146	-0.939899	-0.689055	PYGB	turquoise
ENSG00000100997	0.716719	0.770129	-0.563581	-0.851455	-0.265842	ABHD12	turquoise
ENSG00000101104	0.25833	0.877614	-0.0682902	-0.833972	-0.73072	PABPC1L	turquoise
ENSG00000101150	0.459934	0.980842	-0.221272	-0.957253	-0.678123	TPD52L2	turquoise
ENSG00000101152	0.508191	0.747096	-0.302728	-0.703368	-0.389204	DNAJC5	turquoise
ENSG00000101160	0.285705	0.804751	-0.151723	-0.800779	-0.61835	CTSZ	turquoise
ENSG00000101161	-0.399583	0.240395	0.561304	-0.149519	-0.534928	PRPF6	turquoise
ENSG00000101188	-0.237795	0.216941	0.326403	-0.0423522	-0.399501	NTSR1	turquoise
ENSG00000101193	0.0379025	0.351443	0.0668175	-0.394802	-0.343765	GID8	turquoise
ENSG00000101199	0.460412	0.837391	-0.242658	-0.828904	-0.530753	ARFGAP1	turquoise
ENSG00000101210	0.246979	0.875672	-0.0705613	-0.882721	-0.729044	EEF1A2	turquoise
ENSG00000101213	0.391101	0.962791	-0.174791	-0.940184	-0.711435	PTK6	turquoise
ENSG00000101224	0.633353	0.821137	-0.448331	-0.881123	-0.384709	CDC25B	turquoise
ENSG00000101255	0.41955	0.994137	-0.193885	-0.965611	-0.724154	TRIB3	turquoise
ENSG00000101294	0.397426	0.822843	-0.188148	-0.770681	-0.562404	HM13	turquoise
ENSG00000101298	0.432674	0.947355	-0.185991	-0.923342	-0.664119	SNPH	turquoise
ENSG00000101400	0.342392	0.925778	-0.171176	-0.924337	-0.712127	SNTA1	turquoise
ENSG00000101421	0.311094	0.95731	-0.0745557	-0.909929	-0.757213	CHMP4B	turquoise
ENSG00000101439	-0.307274	0.55189	0.474268	-0.383996	-0.785699	CST3	turquoise
ENSG00000101443	-0.19724	0.534319	0.400541	-0.44037	-0.704499	WFDC2	turquoise
ENSG00000101457	0.363883	0.775563	-0.178009	-0.736479	-0.527245	DNTTIP1	turquoise
ENSG00000101460	0.316173	0.974881	-0.0996209	-0.922341	-0.781565	MAP1LC3A	turquoise
ENSG00000101473	-0.0943473	0.74597	0.318597	-0.635613	-0.85016	ACOT8	turquoise
ENSG00000101493	0.145934	0.756306	0.0467708	-0.724659	-0.684196	ZNF516	turquoise
ENSG00000101557	0.727329	0.880216	-0.549347	-0.949973	-0.380318	USP14	turquoise
ENSG00000101670	0.323579	0.483661	-0.207187	-0.402158	-0.262292	LIPG	turquoise
ENSG00000101843	0.248596	0.606625	-0.0847701	-0.64415	-0.443405	PSMD10	turquoise
ENSG00000101849	0.51053	0.846986	-0.365152	-0.884838	-0.505054	TBL1X	turquoise
ENSG00000101856	0.302735	0.877292	-0.107674	-0.823221	-0.691717	PGRMC1	turquoise
ENSG00000101882	0.147055	0.810263	0.0380984	-0.736126	-0.732616	NKAP	turquoise
ENSG00000101940	0.201706	0.947668	0.0338748	-0.882933	-0.841421	WDR13	turquoise
ENSG00000102003	0.295512	0.913086	-0.0529549	-0.861389	-0.731186	SYP	turquoise
ENSG00000102007	0.595798	0.955384	-0.390938	-0.960133	-0.551343	PLP2	turquoise
ENSG00000102100	0.560152	0.922904	-0.348002	-0.931677	-0.550733	SLC35A2	turquoise
ENSG00000102119	0.637152	0.74187	-0.496644	-0.805576	-0.290288	EMD	turquoise
ENSG00000102316	0.671266	0.890027	-0.480491	-0.910383	-0.422086	MAGED2	turquoise
ENSG00000102390	-0.218924	0.653559	0.416244	-0.555944	-0.83104	PBDC1	turquoise
ENSG00000102401	0.635033	0.936892	-0.456643	-0.97015	-0.507641	ARMCX3	turquoise
ENSG00000102409	0.427669	0.975323	-0.19066	-0.942187	-0.69923	BEX4	turquoise
ENSG00000102471	0.21387	0.234277	-0.1573	-0.198104	-0.105114	NDFIP2	turquoise
ENSG00000102580	0.721193	0.785708	-0.545446	-0.81145	-0.283505	DNAJC3	turquoise
ENSG00000102699	0.779514	0.867951	-0.620073	-0.932939	-0.327415	PARP4	turquoise
ENSG00000102804	0.447689	0.982193	-0.231526	-0.974573	-0.689727	TSC22D1	turquoise
ENSG00000102871	-0.0869851	0.729652	0.301133	-0.630196	-0.819727	TRADD	turquoise
ENSG00000102878	0.302232	0.789493	-0.15737	-0.768723	-0.598612	HSF4	turquoise
ENSG00000102882	-0.0405662	0.450892	0.145004	-0.440182	-0.48616	MAPK3	turquoise
ENSG00000102931	0.733871	0.808502	-0.592132	-0.862771	-0.295334	ARL2BP	turquoise
ENSG00000102996	0.131806	0.826822	0.0612593	-0.75484	-0.753244	MMP15	turquoise
ENSG00000103034	0.47193	0.840085	-0.257832	-0.853946	-0.516648	NDRG4	turquoise
ENSG00000103126	-0.0501722	0.770977	0.277966	-0.666649	-0.841814	AXIN1	turquoise
ENSG00000103145	0.121673	0.904579	0.116023	-0.831765	-0.846152	HCFC1R1	turquoise
ENSG00000103152	-0.254984	0.654641	0.432289	-0.518301	-0.865763	MPG	turquoise
ENSG00000103174	-0.24356	0.577818	0.433584	-0.483077	-0.788259	NAGPA	turquoise
ENSG00000103196	0.640589	0.600678	-0.578428	-0.706972	-0.168532	CRISPLD2	turquoise
ENSG00000103227	0.0756157	0.582455	0.136971	-0.516945	-0.549088	LMF1	turquoise
ENSG00000103264	0.280944	0.835166	-0.104339	-0.836708	-0.663519	FBXO31	turquoise
ENSG00000103269	-0.322681	0.325743	0.416736	-0.267112	-0.573314	RHBDL1	turquoise
ENSG00000103363	-0.247784	0.613487	0.439629	-0.43791	-0.820078	TCEB2	turquoise
ENSG00000103479	0.625292	0.684184	-0.536481	-0.776808	-0.248645	RBL2	turquoise
ENSG00000103496	-0.00229261	0.822993	0.230741	-0.728069	-0.85485	STX4	turquoise
ENSG00000103502	0.307763	0.762414	-0.0919442	-0.763866	-0.562118	CDIPT	turquoise
ENSG00000103528	0.444491	0.893027	-0.206115	-0.875261	-0.591814	SYT17	turquoise
ENSG00000103671	0.189033	0.80911	0.0439069	-0.723971	-0.703406	TRIP4	turquoise
ENSG00000103811	0.495322	0.833084	-0.33166	-0.86584	-0.495097	CTSH	turquoise
ENSG00000103855	0.456652	0.623897	-0.334299	-0.592517	-0.308525	CD276	turquoise
ENSG00000103966	0.673508	0.857132	-0.455307	-0.867009	-0.385925	EHD4	turquoise
ENSG00000104081	0.597482	0.696328	-0.459389	-0.786306	-0.281267	BMF	turquoise
ENSG00000104140	0.126876	0.122233	-0.0519603	-0.195442	-0.0162133	RHOV	turquoise
ENSG00000104154	0.592497	0.897421	-0.374017	-0.905237	-0.489695	SLC30A4	turquoise
ENSG00000104231	0.259099	0.942561	-0.0301925	-0.885218	-0.788544	ZFAND1	turquoise
ENSG00000104312	0.278589	0.880377	-0.0304284	-0.838849	-0.70402	RIPK2	turquoise
ENSG00000104413	0.294003	0.889267	-0.0588424	-0.864996	-0.704255	ESRP1	turquoise
ENSG00000104419	0.490234	0.470382	-0.464716	-0.509818	-0.127944	NDRG1	turquoise
ENSG00000104427	0.398201	0.759429	-0.233994	-0.780726	-0.501697	ZC2HC1A	turquoise
ENSG00000104549	0.411587	0.979693	-0.172469	-0.935442	-0.712089	SQLE	turquoise
ENSG00000104687	0.458625	0.863319	-0.297503	-0.897468	-0.563536	GSR	turquoise
ENSG00000104695	0.258525	0.759019	-0.118988	-0.699888	-0.596744	PPP2CB	turquoise
ENSG00000104783	0.24504	0.821492	-0.138445	-0.807963	-0.681602	KCNN4	turquoise
ENSG00000104805	0.540196	0.905027	-0.351201	-0.933638	-0.542248	NUCB1	turquoise
ENSG00000104808	-0.156587	0.668452	0.316259	-0.59826	-0.820252	DHDH	turquoise
ENSG00000104823	0.569648	0.902091	-0.364156	-0.937843	-0.51258	ECH1	turquoise
ENSG00000104863	-0.302681	0.535763	0.405465	-0.409764	-0.786122	LIN7B	turquoise
ENSG00000104870	-0.0567967	0.745091	0.213086	-0.685451	-0.824161	FCGRT	turquoise
ENSG00000104936	0.000156663	0.692247	0.170744	-0.639151	-0.732701	DMPK	turquoise
ENSG00000104946	0.404442	0.929325	-0.203952	-0.918124	-0.666772	TBC1D17	turquoise
ENSG00000104957	-0.0422402	0.708175	0.211969	-0.640657	-0.773142	CCDC130	turquoise
ENSG00000105048	0.0912304	0.898341	0.153854	-0.815634	-0.860683	TNNT1	turquoise
ENSG00000105223	0.466712	0.958017	-0.274748	-0.95763	-0.655148	PLD3	turquoise
ENSG00000105227	0.332322	0.929532	-0.100403	-0.918492	-0.719008	PRX	turquoise
ENSG00000105281	0.538871	0.942642	-0.333774	-0.956171	-0.58092	SLC1A5	turquoise
ENSG00000105289	0.371114	0.895311	-0.189123	-0.911301	-0.659733	TJP3	turquoise
ENSG00000105321	0.0252497	0.677829	0.193981	-0.590034	-0.675692	CCDC9	turquoise
ENSG00000105327	0.33626	0.980585	-0.121273	-0.952506	-0.769268	BBC3	turquoise
ENSG00000105373	0.289204	0.789778	-0.146846	-0.751797	-0.596117	GLTSCR2	turquoise
ENSG00000105397	0.11775	0.77954	0.0862433	-0.718454	-0.727946	TYK2	turquoise
ENSG00000105404	0.0279777	0.883651	0.176079	-0.796012	-0.902639	RABAC1	turquoise
ENSG00000105443	0.53388	0.836795	-0.379607	-0.852446	-0.474183	CYTH2	turquoise
ENSG00000105479	0.431829	0.641663	-0.321849	-0.702694	-0.356181	CCDC114	turquoise
ENSG00000105499	0.498234	0.753807	-0.356037	-0.81579	-0.418557	PLA2G4C	turquoise
ENSG00000105519	0.320729	0.96685	-0.07944	-0.924296	-0.765709	CAPS	turquoise
ENSG00000105583	-0.0978958	0.674886	0.242937	-0.592156	-0.768016	WDR83OS	turquoise
ENSG00000105605	0.163093	0.706251	0.0114288	-0.628058	-0.618369	CACNG7	turquoise
ENSG00000105612	0.413678	0.940763	-0.203181	-0.933177	-0.671577	DNASE2	turquoise
ENSG00000105640	-0.292712	0.691707	0.482008	-0.571739	-0.936837	RPL18A	turquoise
ENSG00000105662	0.308493	0.687042	-0.175437	-0.721161	-0.496861	CRTC1	turquoise
ENSG00000105696	0.446669	0.772039	-0.360152	-0.799186	-0.471611	TMEM59L	turquoise
ENSG00000105755	-0.090884	0.690167	0.270884	-0.604458	-0.792119	ETHE1	turquoise
ENSG00000105829	0.215327	0.87313	-0.0436065	-0.813752	-0.75119	BET1	turquoise
ENSG00000105856	0.507299	0.69758	-0.38562	-0.778223	-0.354974	HBP1	turquoise
ENSG00000105963	0.166509	0.817491	0.0626356	-0.770493	-0.726047	ADAP1	turquoise
ENSG00000106003	0.415931	0.734586	-0.229076	-0.766266	-0.453654	LFNG	turquoise
ENSG00000106052	0.665919	0.854417	-0.468286	-0.894344	-0.388131	TAX1BP1	turquoise
ENSG00000106070	0.744209	0.615827	-0.588669	-0.649922	-0.0764943	GRB10	turquoise
ENSG00000106089	0.306362	0.85506	-0.0999315	-0.794925	-0.665309	STX1A	turquoise
ENSG00000106105	0.495086	0.971296	-0.277669	-0.965858	-0.641643	GARS	turquoise
ENSG00000106133	-0.190285	0.762393	0.413234	-0.64779	-0.93317	NSUN5P2	turquoise
ENSG00000106211	0.415789	0.983849	-0.196592	-0.980728	-0.715724	HSPB1	turquoise
ENSG00000106245	-0.0218627	0.813014	0.253181	-0.691875	-0.859094	BUD31	turquoise
ENSG00000106330	0.463154	0.720058	-0.36842	-0.744675	-0.404602	MOSPD3	turquoise
ENSG00000106348	0.00533463	0.677407	0.110134	-0.646962	-0.700867	IMPDH1	turquoise
ENSG00000106366	0.123221	0.284603	-0.0498233	-0.18172	-0.210246	SERPINE1	turquoise
ENSG00000106367	-0.0485468	0.769755	0.23489	-0.658566	-0.831879	AP1S1	turquoise
ENSG00000106392	0.0149822	0.060679	0.0503346	0.00693	-0.0382973	C1GALT1	turquoise
ENSG00000106397	0.0121388	0.472747	0.123915	-0.415277	-0.473215	PLOD3	turquoise
ENSG00000106400	-0.328453	0.63831	0.530852	-0.505046	-0.906539	ZNHIT1	turquoise
ENSG00000106404	0.138112	0.830884	0.0241617	-0.750279	-0.768553	CLDN15	turquoise
ENSG00000106443	-0.0541439	0.726291	0.274296	-0.643247	-0.792939	PHF14	turquoise
ENSG00000106479	0.694446	0.705196	-0.57761	-0.761517	-0.229556	ZNF862	turquoise
ENSG00000106541	-0.0422877	0.157567	0.127675	-0.0306292	-0.202976	AGR2	turquoise
ENSG00000106605	0.193778	0.801677	0.00928238	-0.763921	-0.686274	BLVRA	turquoise
ENSG00000106636	0.678554	0.792672	-0.497598	-0.806821	-0.324749	YKT6	turquoise
ENSG00000106665	0.657797	0.849084	-0.453759	-0.911335	-0.400374	CLIP2	turquoise
ENSG00000106683	0.494691	0.696703	-0.280926	-0.6944	-0.370042	LIMK1	turquoise
ENSG00000106733	0.359969	0.865865	-0.109559	-0.817281	-0.631833	NMRK1	turquoise
ENSG00000106789	0.635898	0.879901	-0.439284	-0.943425	-0.447835	CORO2A	turquoise
ENSG00000106948	0.3858	0.92841	-0.145902	-0.913877	-0.676852	AKNA	turquoise
ENSG00000106992	0.185117	0.901424	0.033434	-0.855194	-0.794504	AK1	turquoise
ENSG00000106993	0.0284871	0.700486	0.176253	-0.645284	-0.712009	CDC37L1	turquoise
ENSG00000107021	0.0750352	0.800712	0.118245	-0.729978	-0.770383	TBC1D13	turquoise
ENSG00000107140	0.520294	0.932222	-0.304146	-0.927416	-0.579474	TESK1	turquoise
ENSG00000107175	0.525162	0.874833	-0.312565	-0.841541	-0.511591	CREB3	turquoise
ENSG00000107223	-0.250826	0.697997	0.457591	-0.56616	-0.902941	EDF1	turquoise
ENSG00000107262	0.367014	0.935539	-0.142524	-0.935147	-0.701056	BAG1	turquoise
ENSG00000107263	0.849592	0.773479	-0.702526	-0.859234	-0.17409	RAPGEF1	turquoise
ENSG00000107281	0.182314	0.884349	0.0236891	-0.81875	-0.794331	NPDC1	turquoise
ENSG00000107290	0.0546952	0.779156	0.148055	-0.711309	-0.784023	SETX	turquoise
ENSG00000107331	0.345883	0.684354	-0.23661	-0.736797	-0.46221	ABCA2	turquoise
ENSG00000107372	0.725253	0.875041	-0.537902	-0.937015	-0.369315	ZFAND5	turquoise
ENSG00000107404	0.0206173	0.839949	0.237723	-0.731344	-0.860167	DVL1	turquoise
ENSG00000107537	0.36491	0.845977	-0.204935	-0.86485	-0.619487	PHYH	turquoise
ENSG00000107672	0.222815	0.898841	0.00918906	-0.851693	-0.76766	NSMCE4A	turquoise
ENSG00000107731	0.530157	0.942241	-0.319938	-0.974405	-0.592167	UNC5B	turquoise
ENSG00000107738	0.626052	0.807189	-0.490446	-0.866402	-0.377446	C10orf54	turquoise
ENSG00000107771	0.786185	0.772273	-0.621447	-0.852073	-0.220304	CCSER2	turquoise
ENSG00000107816	0.270149	0.568617	-0.19669	-0.645383	-0.400814	LZTS2	turquoise
ENSG00000107819	0.555755	0.861239	-0.390354	-0.850012	-0.486292	SFXN3	turquoise
ENSG00000107821	0.428417	0.822025	-0.237909	-0.851912	-0.529107	KAZALD1	turquoise
ENSG00000107829	0.541754	0.862498	-0.368425	-0.87403	-0.493315	FBXW4	turquoise
ENSG00000107854	0.86509	0.73829	-0.738527	-0.818302	-0.124856	TNKS2	turquoise
ENSG00000107872	-0.285305	0.523172	0.395518	-0.420211	-0.74725	FBXL15	turquoise
ENSG00000107960	0.463594	0.98614	-0.237316	-0.974591	-0.68293	OBFC1	turquoise
ENSG00000108091	0.752853	0.843772	-0.59862	-0.932721	-0.32414	CCDC6	turquoise
ENSG00000108107	-0.239535	0.748058	0.435346	-0.632032	-0.958569	RPL28	turquoise
ENSG00000108176	0.523807	0.743345	-0.351873	-0.764893	-0.378349	DNAJC12	turquoise
ENSG00000108306	0.327751	0.703466	-0.208581	-0.74761	-0.497294	FBXL20	turquoise
ENSG00000108433	0.639608	0.848715	-0.492729	-0.877008	-0.406471	GOSR2	turquoise
ENSG00000108509	0.213904	0.768892	-0.0458596	-0.717988	-0.632535	CAMTA2	turquoise
ENSG00000108515	0.0309429	0.665727	0.13449	-0.635937	-0.685241	ENO3	turquoise
ENSG00000108587	0.621931	0.673337	-0.494666	-0.737513	-0.252193	GOSR1	turquoise
ENSG00000108639	0.46623	0.939787	-0.22998	-0.945576	-0.63116	SYNGR2	turquoise
ENSG00000108669	0.352066	0.937846	-0.14208	-0.911166	-0.71746	CYTH1	turquoise
ENSG00000108799	0.498906	0.736583	-0.435556	-0.798607	-0.401838	EZH1	turquoise
ENSG00000108828	0.375167	0.984874	-0.145289	-0.962801	-0.746469	VAT1	turquoise
ENSG00000108840	0.425667	0.970048	-0.218195	-0.947624	-0.694274	HDAC5	turquoise
ENSG00000108846	0.579492	0.771025	-0.412952	-0.792357	-0.382793	ABCC3	turquoise
ENSG00000108854	0.283343	0.231314	-0.328209	-0.211404	-0.0348203	SMURF2	turquoise
ENSG00000108861	0.296202	0.926694	-0.10835	-0.901694	-0.740923	DUSP3	turquoise
ENSG00000108947	0.721787	0.728123	-0.594755	-0.841012	-0.227785	EFNB3	turquoise
ENSG00000109065	0.490941	0.955184	-0.275941	-0.939214	-0.630331	NAT9	turquoise
ENSG00000109079	0.688589	0.814678	-0.516241	-0.854743	-0.339052	TNFAIP1	turquoise
ENSG00000109083	0.479725	0.952846	-0.283279	-0.939727	-0.635115	IFT20	turquoise
ENSG00000109084	0.480867	0.936147	-0.285319	-0.906815	-0.621666	TMEM97	turquoise
ENSG00000109089	0.502446	0.955083	-0.273919	-0.939211	-0.619318	CDR2L	turquoise
ENSG00000109113	-0.447859	0.324879	0.616739	-0.165804	-0.65907	RAB34	turquoise
ENSG00000109220	0.335707	0.753832	-0.189594	-0.702577	-0.534825	CHIC2	turquoise
ENSG00000109270	0.333154	0.91681	-0.133807	-0.881193	-0.714322	LAMTOR3	turquoise
ENSG00000109323	0.319977	0.903474	-0.157056	-0.878908	-0.702658	MANBA	turquoise
ENSG00000109436	0.569545	0.880457	-0.363871	-0.885767	-0.493344	TBC1D9	turquoise
ENSG00000109475	0.0850132	0.752066	0.0244091	-0.724727	-0.71469	RPL34	turquoise
ENSG00000109572	0.722457	0.891562	-0.552696	-0.944903	-0.394776	CLCN3	turquoise
ENSG00000109654	0.493414	0.629322	-0.309532	-0.695873	-0.288534	TRIM2	turquoise
ENSG00000109736	-0.162921	0.760402	0.326605	-0.645862	-0.916301	MFSD10	turquoise
ENSG00000109787	0.582066	0.947021	-0.395464	-0.966068	-0.551347	KLF3	turquoise
ENSG00000109790	0.279476	0.439259	-0.194176	-0.365249	-0.248324	KLHL5	turquoise
ENSG00000109854	0.41099	0.963339	-0.172863	-0.942025	-0.696833	HTATIP2	turquoise
ENSG00000109929	0.585651	0.932143	-0.387782	-0.928815	-0.538118	SC5D	turquoise
ENSG00000109944	0.422973	0.836635	-0.208869	-0.824997	-0.553674	C11orf63	turquoise
ENSG00000110002	0.45312	0.781742	-0.291204	-0.82548	-0.477946	VWA5A	turquoise
ENSG00000110011	0.393477	0.790936	-0.215117	-0.807733	-0.535661	DNAJC4	turquoise
ENSG00000110031	0.479913	0.65428	-0.38381	-0.729022	-0.330065	LPXN	turquoise
ENSG00000110046	0.000893681	0.700971	0.195096	-0.620368	-0.723929	ATG2A	turquoise
ENSG00000110048	0.829478	0.809435	-0.684971	-0.893619	-0.228936	OSBP	turquoise
ENSG00000110171	0.127726	0.821795	0.08368	-0.760107	-0.763028	TRIM3	turquoise
ENSG00000110318	0.746975	0.697104	-0.5638	-0.758	-0.171478	KIAA1377	turquoise
ENSG00000110442	-0.0631854	0.723814	0.273307	-0.636984	-0.806015	COMMD9	turquoise
ENSG00000110455	0.0416946	0.71961	0.194611	-0.642954	-0.71862	ACCS	turquoise
ENSG00000110492	0.403635	0.939562	-0.148891	-0.931809	-0.673807	MDK	turquoise
ENSG00000110651	0.585761	0.917416	-0.348969	-0.913612	-0.51501	CD81	turquoise
ENSG00000110675	0.25136	0.459858	-0.133939	-0.395891	-0.293102	ELMOD1	turquoise
ENSG00000110697	0.307453	0.773639	-0.0901843	-0.748103	-0.577108	PITPNM1	turquoise
ENSG00000110700	-0.170067	0.550409	0.271555	-0.511678	-0.703942	RPS13	turquoise
ENSG00000110711	-0.382014	0.521812	0.605147	-0.363983	-0.814417	AIP	turquoise
ENSG00000110723	0.525423	0.575202	-0.340139	-0.607127	-0.204232	EXPH5	turquoise
ENSG00000110921	0.326674	0.979962	-0.0891731	-0.92405	-0.775939	MVK	turquoise
ENSG00000110931	0.429432	0.843295	-0.25281	-0.836117	-0.556583	CAMKK2	turquoise
ENSG00000111087	0.299255	0.691257	-0.106331	-0.695324	-0.497438	GLI1	turquoise
ENSG00000111181	0.564842	0.713026	-0.417608	-0.795046	-0.317733	SLC6A12	turquoise
ENSG00000111269	0.52194	0.873361	-0.350893	-0.905101	-0.518204	CREBL2	turquoise
ENSG00000111275	0.337183	0.815596	-0.0918489	-0.778076	-0.5906	ALDH2	turquoise
ENSG00000111276	0.232297	0.814674	-0.0691266	-0.820586	-0.683425	CDKN1B	turquoise
ENSG00000111325	0.30158	0.825804	-0.120492	-0.801127	-0.648728	OGFOD2	turquoise
ENSG00000111540	0.735292	0.904568	-0.537802	-0.950853	-0.396661	RAB5B	turquoise
ENSG00000111653	0.492499	0.755291	-0.4056	-0.801997	-0.422826	ING4	turquoise
ENSG00000111671	0.133077	0.798907	0.0541814	-0.763871	-0.726048	SPSB2	turquoise
ENSG00000111678	-0.139636	0.784163	0.302953	-0.668742	-0.924261	C12orf57	turquoise
ENSG00000111802	0.222897	0.870107	-0.0504011	-0.844004	-0.741904	TDP2	turquoise
ENSG00000111897	0.74933	0.900532	-0.568006	-0.948212	-0.380367	SERINC1	turquoise
ENSG00000111911	0.515651	0.936535	-0.328648	-0.942371	-0.588155	HINT3	turquoise
ENSG00000111912	0.535062	0.784101	-0.347862	-0.826857	-0.422297	NCOA7	turquoise
ENSG00000111961	0.429814	0.749088	-0.214232	-0.708778	-0.466279	SASH1	turquoise
ENSG00000111981	0.605967	0.901812	-0.398777	-0.94289	-0.488193	ULBP1	turquoise
ENSG00000112033	-0.0403115	0.454183	0.193347	-0.322979	-0.509068	PPARD	turquoise
ENSG00000112079	0.545847	0.798896	-0.373068	-0.844219	-0.415639	STK38	turquoise
ENSG00000112234	0.379233	0.82791	-0.161753	-0.834995	-0.579746	FBXL4	turquoise
ENSG00000112304	-0.411218	0.415122	0.574758	-0.298625	-0.735809	ACOT13	turquoise
ENSG00000112305	0.702996	0.848415	-0.544693	-0.916087	-0.36008	SMAP1	turquoise
ENSG00000112306	-0.175732	0.78008	0.346407	-0.661637	-0.940334	RPS12	turquoise
ENSG00000112308	0.390567	0.918279	-0.172787	-0.917905	-0.66716	C6orf62	turquoise
ENSG00000112378	0.744458	0.881427	-0.551394	-0.922042	-0.367304	PERP	turquoise
ENSG00000112379	0.750981	0.71823	-0.60082	-0.764127	-0.185894	KIAA1244	turquoise
ENSG00000112406	0.393559	0.93745	-0.160256	-0.923841	-0.68499	HECA	turquoise
ENSG00000112658	-0.0671968	0.138024	0.0933813	-0.0376676	-0.195667	SRF	turquoise
ENSG00000112659	-0.202095	0.557462	0.40237	-0.475796	-0.722254	CUL9	turquoise
ENSG00000112679	0.333686	0.807886	-0.15486	-0.7853	-0.587891	DUSP22	turquoise
ENSG00000112715	0.402293	0.936921	-0.221469	-0.930351	-0.67412	VEGFA	turquoise
ENSG00000112761	-0.259687	0.540258	0.435696	-0.440678	-0.761198	WISP3	turquoise
ENSG00000112812	0.374998	0.938534	-0.159562	-0.926836	-0.702795	PRSS16	turquoise
ENSG00000112893	0.609905	0.808784	-0.445754	-0.831051	-0.390713	MAN2A1	turquoise
ENSG00000112972	0.459754	0.977418	-0.240958	-0.945981	-0.676867	HMGCS1	turquoise
ENSG00000112977	0.414026	0.825429	-0.218615	-0.762551	-0.553977	DAP	turquoise
ENSG00000113013	0.588802	0.869443	-0.428402	-0.918504	-0.478456	HSPA9	turquoise
ENSG00000113070	0.231314	0.810746	-0.0197185	-0.710269	-0.674135	HBEGF	turquoise
ENSG00000113083	0.357329	0.425132	-0.215909	-0.379867	-0.164458	LOX	turquoise
ENSG00000113108	0.471411	0.837494	-0.343258	-0.876385	-0.531046	APBB3	turquoise
ENSG00000113161	0.449286	0.975193	-0.244965	-0.954395	-0.68382	HMGCR	turquoise
ENSG00000113163	0.785355	0.677832	-0.710348	-0.772226	-0.119417	COL4A3BP	turquoise
ENSG00000113269	0.448007	0.929565	-0.244593	-0.919657	-0.634493	RNF130	turquoise
ENSG00000113384	0.680854	0.902686	-0.486462	-0.927134	-0.433754	GOLPH3	turquoise
ENSG00000113504	0.701454	0.531907	-0.605068	-0.630293	-0.0297898	SLC12A7	turquoise
ENSG00000113712	0.758902	0.825724	-0.600361	-0.868209	-0.296671	CSNK1A1	turquoise
ENSG00000113734	-0.133015	0.746642	0.347149	-0.654597	-0.882516	BNIP1	turquoise
ENSG00000113851	0.178992	0.702716	0.0109028	-0.700675	-0.60696	CRBN	turquoise
ENSG00000114115	0.25299	0.92895	-0.0482549	-0.893392	-0.784305	RBP1	turquoise
ENSG00000114125	0.36398	0.967106	-0.131822	-0.920501	-0.732774	RNF7	turquoise
ENSG00000114353	0.7344	0.823705	-0.55762	-0.874473	-0.306628	GNAI2	turquoise
ENSG00000114354	0.66662	0.836696	-0.470007	-0.858794	-0.378754	TFG	turquoise
ENSG00000114391	-0.417239	0.390546	0.546308	-0.293441	-0.715679	RPL24	turquoise
ENSG00000114395	0.396679	0.896132	-0.176114	-0.859261	-0.638451	CYB561D2	turquoise
ENSG00000114423	0.437832	0.893247	-0.212212	-0.885339	-0.608717	CBLB	turquoise
ENSG00000114544	-0.258029	0.521628	0.412489	-0.443644	-0.729773	SLC41A3	turquoise
ENSG00000114626	0.297458	0.91895	-0.11628	-0.885469	-0.736244	ABTB1	turquoise
ENSG00000114735	0.198825	0.893858	0.0072745	-0.836296	-0.783578	HEMK1	turquoise
ENSG00000114770	0.361258	0.863986	-0.20795	-0.848139	-0.635835	ABCC5	turquoise
ENSG00000114779	0.2938	0.763692	-0.176561	-0.783225	-0.577568	ABHD14B	turquoise
ENSG00000114784	0.213964	0.867114	-0.00562507	-0.803263	-0.73284	EIF1B	turquoise
ENSG00000114796	0.617198	0.850498	-0.458618	-0.91053	-0.428069	KLHL24	turquoise
ENSG00000114853	0.0541339	0.813853	0.200299	-0.724992	-0.805285	ZBTB47	turquoise
ENSG00000114923	0.223629	0.777544	-0.0287409	-0.723527	-0.635104	SLC4A3	turquoise
ENSG00000114956	-0.0625946	0.722544	0.272559	-0.619399	-0.788307	DGUOK	turquoise
ENSG00000115041	0.00745521	0.229288	0.105189	-0.240641	-0.215861	KCNIP3	turquoise
ENSG00000115042	0.0680627	0.716955	0.115133	-0.665786	-0.686118	FAHD2A	turquoise
ENSG00000115073	0.534983	0.951574	-0.341042	-0.965225	-0.595723	ACTR1B	turquoise
ENSG00000115129	0.275617	0.912396	-0.0783015	-0.896942	-0.748999	TP53I3	turquoise
ENSG00000115170	0.543148	0.956644	-0.324047	-0.947648	-0.592003	ACVR1	turquoise
ENSG00000115216	0.562302	0.644832	-0.47648	-0.674554	-0.261945	NRBP1	turquoise
ENSG00000115266	0.632455	0.626803	-0.517621	-0.686626	-0.176039	APC2	turquoise
ENSG00000115295	0.681384	0.905812	-0.496037	-0.937355	-0.438138	CLIP4	turquoise
ENSG00000115306	0.709215	0.620855	-0.537093	-0.682338	-0.11356	SPTBN1	turquoise
ENSG00000115446	0.346618	0.940088	-0.117761	-0.895006	-0.720807	UNC50	turquoise
ENSG00000115457	0.56461	0.672785	-0.395814	-0.720786	-0.268765	IGFBP2	turquoise
ENSG00000115520	0.626737	0.893814	-0.425744	-0.90219	-0.46544	COQ10B	turquoise
ENSG00000115648	0.289803	0.952897	-0.0756067	-0.896828	-0.780791	MLPH	turquoise
ENSG00000115649	0.587272	0.944019	-0.398553	-0.97056	-0.545328	CNPPD1	turquoise
ENSG00000115756	-0.0795718	0.675251	0.262253	-0.518809	-0.754721	HPCAL1	turquoise
ENSG00000115839	0.449106	0.876395	-0.269341	-0.909664	-0.589891	RAB3GAP1	turquoise
ENSG00000115902	0.60711	0.849958	-0.388732	-0.84955	-0.427773	SLC1A4	turquoise
ENSG00000115944	0.354117	0.960747	-0.14017	-0.91807	-0.731615	COX7A2L	turquoise
ENSG00000115993	0.71673	0.650379	-0.575298	-0.717384	-0.153512	TRAK2	turquoise
ENSG00000116016	-0.159268	0.223857	0.218449	-0.0904886	-0.351669	EPAS1	turquoise
ENSG00000116032	0.658385	0.859699	-0.46554	-0.907597	-0.40928	GRIN3B	turquoise
ENSG00000116133	0.629204	0.888092	-0.441245	-0.885719	-0.459159	DHCR24	turquoise
ENSG00000116191	0.702508	0.705926	-0.604637	-0.79606	-0.218127	RALGPS2	turquoise
ENSG00000116209	0.465204	0.970964	-0.254381	-0.982215	-0.666326	TMEM59	turquoise
ENSG00000116212	0.0868026	0.752054	0.0634497	-0.684445	-0.705871	LRRC42	turquoise
ENSG00000116260	0.0396186	0.685451	0.203937	-0.58604	-0.667091	QSOX1	turquoise
ENSG00000116285	0.617084	0.717485	-0.49431	-0.721431	-0.283147	ERRFI1	turquoise
ENSG00000116514	0.322498	0.880992	-0.0800634	-0.808726	-0.669207	RNF19B	turquoise
ENSG00000116574	0.569612	0.850188	-0.37698	-0.909791	-0.462001	RHOU	turquoise
ENSG00000116584	0.433592	0.977065	-0.195748	-0.942354	-0.696073	ARHGEF2	turquoise
ENSG00000116586	0.0568121	0.714254	0.0878359	-0.664329	-0.700543	LAMTOR2	turquoise
ENSG00000116604	0.687731	0.709093	-0.564362	-0.797362	-0.222389	MEF2D	turquoise
ENSG00000116661	0.25792	0.956833	-0.0268881	-0.911842	-0.80352	FBXO2	turquoise
ENSG00000116663	-0.0347119	0.810404	0.230634	-0.722751	-0.869127	FBXO6	turquoise
ENSG00000116678	0.442854	0.831332	-0.221483	-0.826881	-0.537482	LEPR	turquoise
ENSG00000116717	0.24899	0.924446	-0.0246862	-0.875835	-0.775472	GADD45A	turquoise
ENSG00000116729	0.663503	0.553359	-0.564907	-0.597126	-0.0804755	WLS	turquoise
ENSG00000116761	0.425574	0.915042	-0.255524	-0.910487	-0.641522	CTH	turquoise
ENSG00000116954	0.406203	0.971269	-0.171051	-0.949234	-0.709211	RRAGC	turquoise
ENSG00000116985	0.469932	0.863325	-0.252443	-0.833876	-0.550051	BMP8B	turquoise
ENSG00000117016	0.418522	0.854662	-0.194499	-0.854835	-0.581546	RIMS3	turquoise
ENSG00000117036	0.695276	0.752302	-0.593606	-0.824007	-0.264597	ETV3	turquoise
ENSG00000117151	0.244921	0.902548	-0.0101191	-0.819904	-0.760207	CTBS	turquoise
ENSG00000117226	0.0765162	0.255681	0.0414337	-0.220554	-0.198442	GBP3	turquoise
ENSG00000117245	0.252121	0.867989	-0.0390815	-0.80426	-0.711524	KIF17	turquoise
ENSG00000117305	0.329827	0.933999	-0.102129	-0.890136	-0.717301	HMGCL	turquoise
ENSG00000117308	0.118577	0.799874	0.0479468	-0.726286	-0.744977	GALE	turquoise
ENSG00000117335	0.754422	0.802418	-0.620033	-0.85197	-0.273864	CD46	turquoise
ENSG00000117448	0.449871	0.951069	-0.232577	-0.921894	-0.660507	AKR1A1	turquoise
ENSG00000117450	0.563385	0.966872	-0.35562	-0.984981	-0.589629	PRDX1	turquoise
ENSG00000117475	0.694628	0.896643	-0.510596	-0.922589	-0.420362	BLZF1	turquoise
ENSG00000117481	0.406619	0.834104	-0.216513	-0.840026	-0.572149	NSUN4	turquoise
ENSG00000117505	-0.23893	0.489463	0.369914	-0.425924	-0.685787	DR1	turquoise
ENSG00000117533	0.425454	0.819221	-0.233533	-0.818681	-0.534208	VAMP4	turquoise
ENSG00000117614	0.232794	0.887398	-0.0312525	-0.872734	-0.752375	SYF2	turquoise
ENSG00000117616	0.311952	0.848436	-0.118055	-0.847396	-0.652201	RSRP1	turquoise
ENSG00000117620	0.560555	0.44135	-0.535427	-0.571979	-0.044479	SLC35A3	turquoise
ENSG00000117682	0.535907	0.872752	-0.353753	-0.890443	-0.519061	DHDDS	turquoise
ENSG00000117691	0.217076	0.842049	-0.0420891	-0.799264	-0.708351	NENF	turquoise
ENSG00000117758	0.491198	0.83493	-0.303135	-0.817959	-0.492824	STX12	turquoise
ENSG00000117862	0.33578	0.919785	-0.129843	-0.889063	-0.706484	TXNDC12	turquoise
ENSG00000117984	0.534096	0.985754	-0.312776	-0.985501	-0.630747	CTSD	turquoise
ENSG00000118217	0.809352	0.804264	-0.681124	-0.888877	-0.235248	ATF6	turquoise
ENSG00000118242	0.486701	0.576535	-0.366939	-0.538522	-0.232816	MREG	turquoise
ENSG00000118263	0.730547	0.753484	-0.582955	-0.834766	-0.246937	KLF7	turquoise
ENSG00000118508	0.196997	0.92341	0.040629	-0.82697	-0.809446	RAB32	turquoise
ENSG00000118518	0.252531	0.879196	-0.018733	-0.838873	-0.735445	RNF146	turquoise
ENSG00000118640	0.115075	0.906928	0.130312	-0.835024	-0.854399	VAMP8	turquoise
ENSG00000118680	-0.294485	0.207071	0.386963	-0.0344318	-0.422343	MYL12B	turquoise
ENSG00000118689	0.705859	0.841278	-0.529174	-0.916006	-0.348807	FOXO3	turquoise
ENSG00000118898	0.513757	0.954309	-0.294394	-0.974429	-0.615776	PPL	turquoise
ENSG00000119004	0.418687	0.814933	-0.218643	-0.809802	-0.531066	CYP20A1	turquoise
ENSG00000119048	0.24732	0.864385	-0.0233526	-0.810565	-0.71594	UBE2B	turquoise
ENSG00000119125	0.337854	0.952803	-0.114851	-0.907581	-0.744342	GDA	turquoise
ENSG00000119138	0.59234	0.860816	-0.462107	-0.922541	-0.457102	KLF9	turquoise
ENSG00000119523	0.327608	0.774942	-0.185244	-0.739114	-0.566858	ALG2	turquoise
ENSG00000119537	0.407593	0.778649	-0.259063	-0.763524	-0.513149	KDSR	turquoise
ENSG00000119636	0.728659	0.546925	-0.632365	-0.652749	-0.0338572	CCDC176	turquoise
ENSG00000119686	0.629488	0.684301	-0.495012	-0.750361	-0.248904	FLVCR2	turquoise
ENSG00000119729	0.452051	0.95415	-0.217679	-0.932828	-0.655601	RHOQ	turquoise
ENSG00000119760	0.243321	0.915775	-0.0518539	-0.858252	-0.772245	SUPT7L	turquoise
ENSG00000119777	0.622744	0.748969	-0.464527	-0.755516	-0.32208	TMEM214	turquoise
ENSG00000119782	0.395301	0.959168	-0.149839	-0.91722	-0.703612	FKBP1B	turquoise
ENSG00000119801	0.497347	0.97564	-0.287094	-0.980694	-0.643438	YPEL5	turquoise
ENSG00000119820	0.263938	0.861037	-0.0859914	-0.85366	-0.708749	YIPF4	turquoise
ENSG00000119844	0.251613	0.92374	-0.0233574	-0.879536	-0.779335	AFTPH	turquoise
ENSG00000119888	0.392168	0.879378	-0.172272	-0.854766	-0.624627	EPCAM	turquoise
ENSG00000119899	0.812766	0.760905	-0.679289	-0.847595	-0.187317	SLC17A5	turquoise
ENSG00000119950	0.368492	0.823617	-0.226134	-0.856027	-0.58146	MXI1	turquoise
ENSG00000119965	0.466907	0.693155	-0.333642	-0.691854	-0.37138	C10orf88	turquoise
ENSG00000119979	0.550933	0.593544	-0.405076	-0.665183	-0.204238	FAM45A	turquoise
ENSG00000120053	0.336196	0.933105	-0.122533	-0.886465	-0.71863	GOT1	turquoise
ENSG00000120063	0.748411	0.74644	-0.605718	-0.844466	-0.2198	GNA13	turquoise
ENSG00000120129	0.482012	0.986701	-0.255486	-0.970426	-0.666726	DUSP1	turquoise
ENSG00000120149	0.400902	0.938352	-0.178469	-0.902889	-0.676457	MSX2	turquoise
ENSG00000120256	0.782377	0.813357	-0.619767	-0.87423	-0.26816	LRP11	turquoise
ENSG00000120265	0.185943	0.75584	-0.00555656	-0.694189	-0.632026	PCMT1	turquoise
ENSG00000120306	0.212011	0.940791	0.0334333	-0.864173	-0.821259	CYSTM1	turquoise
ENSG00000120437	0.358459	0.965723	-0.131467	-0.907683	-0.738645	ACAT2	turquoise
ENSG00000120686	0.504255	0.956037	-0.307551	-0.943796	-0.621659	UFM1	turquoise
ENSG00000120690	0.724052	0.885582	-0.547832	-0.948723	-0.384387	ELF1	turquoise
ENSG00000120709	0.767899	0.725234	-0.666507	-0.853682	-0.191106	FAM53C	turquoise
ENSG00000120725	-0.215058	0.612193	0.362769	-0.502332	-0.801733	SIL1	turquoise
ENSG00000120738	-0.249072	0.16408	0.234181	-0.0492975	-0.367701	EGR1	turquoise
ENSG00000120742	0.452067	0.94421	-0.224045	-0.906282	-0.649032	SERP1	turquoise
ENSG00000120805	0.474872	0.93121	-0.28337	-0.930489	-0.62367	ARL1	turquoise
ENSG00000120860	0.50368	0.75481	-0.378341	-0.788826	-0.408806	CCDC53	turquoise
ENSG00000120885	0.72404	0.861934	-0.530753	-0.889662	-0.360573	CLU	turquoise
ENSG00000120889	0.495796	0.921658	-0.32013	-0.929828	-0.599515	TNFRSF10B	turquoise
ENSG00000121089	-0.335743	0.629464	0.507696	-0.503457	-0.901448	NACA3P	turquoise
ENSG00000121104	0.0255017	0.839924	0.203481	-0.730365	-0.856355	FAM117A	turquoise
ENSG00000121281	0.545573	0.704768	-0.461207	-0.744277	-0.334412	ADCY7	turquoise
ENSG00000121310	0.0289399	0.828239	0.180442	-0.772991	-0.843936	ECHDC2	turquoise
ENSG00000121410	0.178445	0.940247	0.0712044	-0.863715	-0.841346	A1BG	turquoise
ENSG00000121578	0.236136	0.876272	-0.00850417	-0.810622	-0.736809	B4GALT4	turquoise
ENSG00000121653	0.471018	0.943013	-0.253162	-0.930978	-0.632596	MAPK8IP1	turquoise
ENSG00000121671	0.614652	0.730831	-0.465418	-0.793733	-0.317389	CRY2	turquoise
ENSG00000121691	0.643883	0.483853	-0.476657	-0.53228	-0.0156383	CAT	turquoise
ENSG00000121749	0.64699	0.668535	-0.519356	-0.738401	-0.215527	TBC1D15	turquoise
ENSG00000121753	-0.279398	0.458459	0.44714	-0.347445	-0.686345	BAI2	turquoise
ENSG00000121900	-0.0603652	0.765539	0.290031	-0.631767	-0.828849	TMEM54	turquoise
ENSG00000121931	0.324103	0.931733	-0.0916907	-0.871291	-0.724355	LRIF1	turquoise
ENSG00000122033	0.107145	0.783369	0.0747805	-0.729971	-0.728443	MTIF3	turquoise
ENSG00000122042	0.55847	0.947098	-0.328152	-0.963595	-0.566457	UBL3	turquoise
ENSG00000122359	0.234013	0.738414	-0.0271818	-0.67741	-0.577273	ANXA11	turquoise
ENSG00000122378	0.370901	0.961094	-0.132902	-0.907331	-0.722647	FAM213A	turquoise
ENSG00000122386	-0.00710761	0.595655	0.174814	-0.567292	-0.614737	ZNF205	turquoise
ENSG00000122481	-0.33403	0.621448	0.503204	-0.483336	-0.899706	RWDD3	turquoise
ENSG00000122643	0.126522	0.694519	0.0295027	-0.65536	-0.63774	NT5C3A	turquoise
ENSG00000122674	-0.341658	0.423682	0.487608	-0.299664	-0.685589	CCZ1	turquoise
ENSG00000123091	0.580539	0.907347	-0.393035	-0.918034	-0.512092	RNF11	turquoise
ENSG00000123143	0.0513214	0.890624	0.16494	-0.820973	-0.895217	PKN1	turquoise
ENSG00000123146	0.541551	0.64882	-0.370944	-0.723727	-0.271344	CD97	turquoise
ENSG00000123159	-0.143507	0.553917	0.316006	-0.427131	-0.684167	GIPC1	turquoise
ENSG00000123240	0.347419	0.825567	-0.166166	-0.827175	-0.604155	OPTN	turquoise
ENSG00000123349	-0.452788	0.492863	0.620332	-0.369317	-0.85598	PFDN5	turquoise
ENSG00000123358	0.19674	0.676718	-0.0630074	-0.648499	-0.568109	NR4A1	turquoise
ENSG00000123384	0.391138	0.752908	-0.298953	-0.801629	-0.506565	LRP1	turquoise
ENSG00000123395	0.0260326	0.84095	0.226854	-0.751445	-0.853343	ATG101	turquoise
ENSG00000123427	0.346843	0.572864	-0.285564	-0.633595	-0.348306	METTL21B	turquoise
ENSG00000123870	0.392129	0.214757	-0.348713	-0.280573	0.0787087	ZNF137P	turquoise
ENSG00000123933	-0.160543	0.604228	0.304271	-0.558235	-0.754551	MXD4	turquoise
ENSG00000123989	0.396417	0.933314	-0.171153	-0.876462	-0.67638	CHPF	turquoise
ENSG00000124074	-0.3519	0.437524	0.495892	-0.313016	-0.710194	ENKD1	turquoise
ENSG00000124098	0.294296	0.707014	-0.242769	-0.743655	-0.526497	FAM210B	turquoise
ENSG00000124104	0.084788	0.651224	0.107404	-0.581903	-0.617552	SNX21	turquoise
ENSG00000124145	0.570344	0.632643	-0.411801	-0.685805	-0.224082	SDC4	turquoise
ENSG00000124155	0.401203	0.924164	-0.160529	-0.901195	-0.662185	PIGT	turquoise
ENSG00000124164	0.360298	0.385855	-0.255135	-0.378596	-0.128289	VAPB	turquoise
ENSG00000124171	-0.0039866	0.434294	0.166191	-0.433132	-0.445611	PARD6B	turquoise
ENSG00000124191	-0.270592	0.436501	0.421457	-0.250091	-0.649767	TOX2	turquoise
ENSG00000124209	0.521033	0.931602	-0.311869	-0.920852	-0.579614	RAB22A	turquoise
ENSG00000124222	0.494197	0.661672	-0.413399	-0.714273	-0.330594	STX16	turquoise
ENSG00000124224	0.489694	0.870581	-0.319606	-0.86368	-0.543875	PPP4R1L	turquoise
ENSG00000124299	-0.302404	0.605512	0.51626	-0.474481	-0.849158	PEPD	turquoise
ENSG00000124313	0.336052	0.892301	-0.132887	-0.868105	-0.686653	IQSEC2	turquoise
ENSG00000124357	0.229688	0.892565	-0.00669536	-0.845676	-0.766246	NAGK	turquoise
ENSG00000124370	0.545891	0.860257	-0.350735	-0.888187	-0.494479	MCEE	turquoise
ENSG00000124523	0.37226	0.798355	-0.204807	-0.834553	-0.553571	SIRT5	turquoise
ENSG00000124588	0.295521	0.871269	-0.161221	-0.877708	-0.68842	NQO2	turquoise
ENSG00000124593	0.428313	0.883575	-0.222622	-0.872515	-0.603934	PRICKLE4	turquoise
ENSG00000124613	0.521604	0.676807	-0.420586	-0.737771	-0.332179	ZNF391	turquoise
ENSG00000124659	-0.215296	0.664883	0.44239	-0.539919	-0.850896	TBCC	turquoise
ENSG00000124749	0.642731	0.678208	-0.491946	-0.725716	-0.236156	COL21A1	turquoise
ENSG00000124762	0.565617	0.806948	-0.350131	-0.800102	-0.411916	CDKN1A	turquoise
ENSG00000124786	0.241898	0.670258	-0.0800532	-0.631094	-0.511687	SLC35B3	turquoise
ENSG00000124788	0.81371	0.826497	-0.649966	-0.912194	-0.255517	ATXN1	turquoise
ENSG00000124942	0.385719	0.327824	-0.266587	-0.414886	-0.0523994	AHNAK	turquoise
ENSG00000125124	0.593776	0.727279	-0.493195	-0.772847	-0.30941	BBS2	turquoise
ENSG00000125170	0.119029	0.727394	0.0654851	-0.701237	-0.678531	DOK4	turquoise
ENSG00000125246	0.050255	0.74448	0.143775	-0.701854	-0.73989	CLYBL	turquoise
ENSG00000125304	0.785731	0.869082	-0.611599	-0.928514	-0.322376	TM9SF2	turquoise
ENSG00000125352	0.201665	0.827969	-0.00582138	-0.770763	-0.703709	RNF113A	turquoise
ENSG00000125356	-0.0730108	0.66287	0.251978	-0.549065	-0.737287	NDUFA1	turquoise
ENSG00000125449	0.219451	0.865203	-0.00892627	-0.813543	-0.736362	ARMC7	turquoise
ENSG00000125457	-0.0918096	0.717467	0.31674	-0.64493	-0.819505	MIF4GD	turquoise
ENSG00000125458	-0.363376	0.588458	0.5403	-0.470569	-0.89189	NT5C	turquoise
ENSG00000125520	0.218797	0.945892	0.0143299	-0.894779	-0.823405	SLC2A4RG	turquoise
ENSG00000125534	0.475337	0.936588	-0.260849	-0.941614	-0.62662	PPDPF	turquoise
ENSG00000125637	0.30009	0.805571	-0.172746	-0.808952	-0.621248	PSD4	turquoise
ENSG00000125648	0.516295	0.629527	-0.448848	-0.706644	-0.283448	SLC25A23	turquoise
ENSG00000125652	0.0634845	0.907399	0.172335	-0.824167	-0.898733	ALKBH7	turquoise
ENSG00000125656	-0.396051	0.484207	0.509449	-0.349244	-0.802341	CLPP	turquoise
ENSG00000125657	-0.219621	0.372219	0.413246	-0.244089	-0.538173	TNFSF9	turquoise
ENSG00000125731	0.41743	0.649749	-0.200522	-0.615333	-0.35584	SH2D3A	turquoise
ENSG00000125744	0.304034	0.874442	-0.140242	-0.844236	-0.686679	RTN2	turquoise
ENSG00000125772	0.557447	0.887226	-0.357768	-0.915435	-0.507802	GPCPD1	turquoise
ENSG00000125812	0.593577	0.581789	-0.514135	-0.61265	-0.165982	GZF1	turquoise
ENSG00000125814	0.391582	0.678899	-0.284541	-0.723647	-0.426983	NAPB	turquoise
ENSG00000125821	0.254748	0.882712	-0.0908955	-0.857759	-0.731074	DTD1	turquoise
ENSG00000125826	0.340825	0.980455	-0.118077	-0.933838	-0.764816	RBCK1	turquoise
ENSG00000125841	0.485285	0.916832	-0.265201	-0.941146	-0.594417	NRSN2	turquoise
ENSG00000125846	0.346868	0.754877	-0.172334	-0.76615	-0.528415	ZNF133	turquoise
ENSG00000125864	0.0258132	0.84234	0.218723	-0.752714	-0.851228	BFSP1	turquoise
ENSG00000125868	0.444276	0.757005	-0.271492	-0.710493	-0.465793	DSTN	turquoise
ENSG00000125875	0.793744	0.833926	-0.651816	-0.911928	-0.280657	TBC1D20	turquoise
ENSG00000125945	0.612745	0.885922	-0.424205	-0.919909	-0.468769	ZNF436	turquoise
ENSG00000125971	0.0430559	0.887019	0.207492	-0.783971	-0.892038	DYNLRB1	turquoise
ENSG00000125977	-0.0682565	0.833771	0.290014	-0.735837	-0.920617	EIF2S2	turquoise
ENSG00000125991	0.24896	0.902969	-0.014205	-0.850964	-0.75324	ERGIC3	turquoise
ENSG00000126062	-0.241115	0.620449	0.45674	-0.492236	-0.812455	TMEM115	turquoise
ENSG00000126106	0.305854	0.907697	-0.0952089	-0.882073	-0.723778	TMEM53	turquoise
ENSG00000126107	0.499816	0.843756	-0.335176	-0.873009	-0.514131	HECTD3	turquoise
ENSG00000126226	0.0387146	0.769353	0.179312	-0.669852	-0.770077	PCID2	turquoise
ENSG00000126247	0.378579	0.894549	-0.137473	-0.844277	-0.652575	CAPNS1	turquoise
ENSG00000126391	0.367751	0.628387	-0.241345	-0.676774	-0.392988	FRMD8	turquoise
ENSG00000126432	0.282415	0.968836	-0.0318851	-0.910147	-0.796988	PRDX5	turquoise
ENSG00000126458	0.0885766	0.903053	0.143547	-0.81729	-0.87365	RRAS	turquoise
ENSG00000126524	0.316961	0.754496	-0.134655	-0.697904	-0.553601	SBDS	turquoise
ENSG00000126583	0.502014	0.846713	-0.274272	-0.826561	-0.512149	PRKCG	turquoise
ENSG00000126775	0.387884	0.744675	-0.266398	-0.796417	-0.493053	ATG14	turquoise
ENSG00000126821	0.61768	0.89884	-0.431868	-0.91449	-0.473145	SGPP1	turquoise
ENSG00000126903	0.614499	0.892607	-0.426122	-0.907263	-0.476814	SLC10A3	turquoise
ENSG00000126947	0.406121	0.969731	-0.157673	-0.944456	-0.708349	ARMCX1	turquoise
ENSG00000127125	0.0336349	0.800564	0.161197	-0.736733	-0.806884	PPCS	turquoise
ENSG00000127415	0.119058	0.850632	0.0880519	-0.77716	-0.80347	IDUA	turquoise
ENSG00000127418	0.531539	0.968587	-0.297843	-0.971999	-0.611887	FGFRL1	turquoise
ENSG00000127419	0.279145	0.724697	-0.151308	-0.707479	-0.55478	TMEM175	turquoise
ENSG00000127526	0.630954	0.776441	-0.498266	-0.79995	-0.340831	SLC35E1	turquoise
ENSG00000127528	0.353948	0.957332	-0.170541	-0.931003	-0.734054	KLF2	turquoise
ENSG00000127540	-0.286218	0.638757	0.419854	-0.536791	-0.884725	UQCR11	turquoise
ENSG00000127561	0.409142	0.986635	-0.166519	-0.961116	-0.72347	SYNGR3	turquoise
ENSG00000127666	-0.0909806	0.735543	0.284266	-0.616983	-0.835951	TICAM1	turquoise
ENSG00000127824	0.562526	0.720234	-0.412245	-0.772015	-0.345262	TUBA4A	turquoise
ENSG00000127870	0.656556	0.702049	-0.492182	-0.758463	-0.245315	RNF6	turquoise
ENSG00000127914	-0.0380845	0.742144	0.25454	-0.604799	-0.795979	AKAP9	turquoise
ENSG00000128016	0.635478	0.940778	-0.417646	-0.952594	-0.506956	ZFP36	turquoise
ENSG00000128159	0.0947172	0.777665	0.0750038	-0.719142	-0.750672	TUBGCP6	turquoise
ENSG00000128185	-0.00179379	0.869828	0.231431	-0.775126	-0.907283	DGCR6L	turquoise
ENSG00000128245	0.532753	0.855734	-0.310402	-0.884133	-0.492453	YWHAH	turquoise
ENSG00000128266	-0.243191	0.651641	0.427485	-0.512178	-0.869283	GNAZ	turquoise
ENSG00000128272	0.43834	0.994851	-0.215299	-0.97784	-0.709951	ATF4	turquoise
ENSG00000128274	0.481175	0.653286	-0.256684	-0.667918	-0.309469	A4GALT	turquoise
ENSG00000128309	0.0745411	0.848732	0.158792	-0.8008	-0.826261	MPST	turquoise
ENSG00000128311	-0.351534	0.108546	0.407357	-0.0700423	-0.354669	TST	turquoise
ENSG00000128335	0.539906	0.844694	-0.345007	-0.866009	-0.483083	APOL2	turquoise
ENSG00000128342	0.378646	0.399475	-0.302781	-0.357204	-0.135098	LIF	turquoise
ENSG00000128346	0.469386	0.931439	-0.271879	-0.922983	-0.625544	C22orf23	turquoise
ENSG00000128513	0.116308	0.271788	-0.0370115	-0.354674	-0.209035	POT1	turquoise
ENSG00000128524	-0.245992	0.634891	0.423001	-0.530414	-0.839065	ATP6V1F	turquoise
ENSG00000128564	-0.488972	0.36945	0.627045	-0.167306	-0.740817	VGF	turquoise
ENSG00000128590	0.25037	0.870933	-0.0228538	-0.797998	-0.720033	DNAJB9	turquoise
ENSG00000128591	0.527048	0.978366	-0.296291	-0.972319	-0.626281	FLNC	turquoise
ENSG00000128604	0.34542	0.917631	-0.110906	-0.885378	-0.694328	IRF5	turquoise
ENSG00000128692	-0.0784684	0.751894	0.271323	-0.679024	-0.846131	EIF2S2P4	turquoise
ENSG00000128699	0.191217	0.740399	-0.0672667	-0.714882	-0.630956	ORMDL1	turquoise
ENSG00000128739	0.135128	0.870522	0.116203	-0.781095	-0.801648	SNRPN	turquoise
ENSG00000128886	0.53366	0.795341	-0.326149	-0.839289	-0.430067	ELL3	turquoise
ENSG00000128965	0.311061	0.984097	-0.0754825	-0.937911	-0.793578	CHAC1	turquoise
ENSG00000129055	0.168934	0.82263	0.0449405	-0.767523	-0.727769	ANAPC13	turquoise
ENSG00000129083	0.507556	0.954378	-0.286339	-0.935197	-0.618191	COPB1	turquoise
ENSG00000129158	0.168301	0.902547	0.0449649	-0.850416	-0.81833	SERGEF	turquoise
ENSG00000129197	0.136467	0.861045	0.091772	-0.808322	-0.79196	RPAIN	turquoise
ENSG00000129353	0.324937	0.808339	-0.131714	-0.838215	-0.606122	SLC44A2	turquoise
ENSG00000129518	0.141525	0.762875	0.00649047	-0.748161	-0.683233	EAPP	turquoise
ENSG00000129562	0.13524	0.718525	0.0750924	-0.594052	-0.64172	DAD1	turquoise
ENSG00000129566	0.0970408	0.518105	0.0827058	-0.431849	-0.46105	TEP1	turquoise
ENSG00000129946	0.46244	0.970405	-0.235476	-0.950169	-0.667612	SHC2	turquoise
ENSG00000129968	-0.437745	0.300357	0.564833	-0.163294	-0.631181	ABHD17A	turquoise
ENSG00000129990	0.443258	0.959809	-0.239641	-0.957881	-0.669728	SYT5	turquoise
ENSG00000129991	-0.20082	0.643361	0.38982	-0.559181	-0.822799	TNNI3	turquoise
ENSG00000130045	-0.079722	0.718102	0.229919	-0.654765	-0.811752	NXNL2	turquoise
ENSG00000130054	0.165802	0.77014	0.0716619	-0.70422	-0.683722	FAM155B	turquoise
ENSG00000130066	0.403452	0.974182	-0.16148	-0.930373	-0.712534	SAT1	turquoise
ENSG00000130164	0.50171	0.952318	-0.276255	-0.925805	-0.61631	LDLR	turquoise
ENSG00000130176	0.476711	0.960552	-0.266172	-0.954649	-0.6479	CNN1	turquoise
ENSG00000130177	-0.220192	0.638818	0.396342	-0.545103	-0.832017	CDC16	turquoise
ENSG00000130203	0.338777	0.979451	-0.0868176	-0.939309	-0.767472	APOE	turquoise
ENSG00000130208	0.493451	0.906682	-0.336354	-0.927504	-0.573678	APOC1	turquoise
ENSG00000130222	-0.139302	0.693666	0.381921	-0.590548	-0.831783	GADD45G	turquoise
ENSG00000130244	0.0313609	0.666353	0.114288	-0.617958	-0.67975	FAM98C	turquoise
ENSG00000130294	0.537312	0.77155	-0.334455	-0.753907	-0.393522	KIF1A	turquoise
ENSG00000130313	0.124236	0.895347	0.0786249	-0.826966	-0.836434	PGLS	turquoise
ENSG00000130340	0.606071	0.828042	-0.415098	-0.808079	-0.409393	SNX9	turquoise
ENSG00000130363	0.648528	0.910102	-0.477774	-0.962523	-0.468924	RSPH3	turquoise
ENSG00000130429	-0.0762634	0.690664	0.261005	-0.550462	-0.775774	ARPC1B	turquoise
ENSG00000130433	-0.00688169	0.578235	0.167422	-0.478041	-0.60717	CACNG6	turquoise
ENSG00000130449	0.474529	0.843284	-0.254304	-0.81767	-0.528253	ZSWIM6	turquoise
ENSG00000130513	0.242792	0.927846	-0.000952386	-0.838572	-0.784042	GDF15	turquoise
ENSG00000130517	-0.0644037	0.691423	0.219296	-0.583949	-0.772781	PGPEP1	turquoise
ENSG00000130522	0.354151	0.987721	-0.124714	-0.950659	-0.762818	JUND	turquoise
ENSG00000130584	0.301722	0.827496	-0.0579133	-0.755147	-0.632066	ZBTB46	turquoise
ENSG00000130589	0.520158	0.881096	-0.357026	-0.896344	-0.535865	HELZ2	turquoise
ENSG00000130702	0.26289	0.93081	0.00418064	-0.876032	-0.771922	LAMA5	turquoise
ENSG00000130707	0.445484	0.956703	-0.232427	-0.956366	-0.670957	ASS1	turquoise
ENSG00000130724	0.0343664	0.899035	0.212426	-0.792125	-0.907596	CHMP2A	turquoise
ENSG00000130733	0.525526	0.915339	-0.335529	-0.914514	-0.5658	YIPF2	turquoise
ENSG00000130758	0.411797	0.972563	-0.164738	-0.931894	-0.707231	MAP3K10	turquoise
ENSG00000130762	0.364542	0.9052	-0.145187	-0.892362	-0.673334	ARHGEF16	turquoise
ENSG00000130766	0.411984	0.989848	-0.198111	-0.960505	-0.725663	SESN2	turquoise
ENSG00000130779	0.616471	0.936555	-0.423791	-0.981427	-0.521153	CLIP1	turquoise
ENSG00000130822	0.498849	0.89137	-0.319105	-0.919821	-0.563324	PNCK	turquoise
ENSG00000130830	0.455513	0.796812	-0.213511	-0.798306	-0.483923	MPP1	turquoise
ENSG00000130956	0.212787	0.947232	0.0354026	-0.863598	-0.82722	HABP4	turquoise
ENSG00000130958	0.291176	0.826913	-0.103574	-0.765482	-0.636295	SLC35D2	turquoise
ENSG00000131013	0.366619	0.825318	-0.21498	-0.820377	-0.588403	PPIL4	turquoise
ENSG00000131018	0.320378	0.686245	-0.135217	-0.637803	-0.476115	SYNE1	turquoise
ENSG00000131037	0.00475333	0.84039	0.230059	-0.715856	-0.868261	EPS8L1	turquoise
ENSG00000131051	0.597636	0.824088	-0.467657	-0.881671	-0.418955	RBM39	turquoise
ENSG00000131067	0.373464	0.931633	-0.157599	-0.888966	-0.693869	GGT7	turquoise
ENSG00000131069	0.433943	0.980213	-0.202795	-0.946316	-0.700227	ACSS2	turquoise
ENSG00000131116	-0.257989	0.69666	0.455822	-0.589795	-0.922479	ZNF428	turquoise
ENSG00000131171	0.63716	0.853332	-0.418622	-0.882114	-0.410489	SH3BGRL	turquoise
ENSG00000131370	0.551895	0.948406	-0.340666	-0.956185	-0.57551	SH3BP5	turquoise
ENSG00000131408	0.0501541	0.889974	0.181164	-0.813576	-0.893642	NR1H2	turquoise
ENSG00000131473	0.714486	0.723082	-0.604568	-0.767666	-0.218601	ACLY	turquoise
ENSG00000131584	0.495222	0.804298	-0.363707	-0.833915	-0.469195	ACAP3	turquoise
ENSG00000131711	0.701738	0.665662	-0.521943	-0.707714	-0.163141	MAP1B	turquoise
ENSG00000131725	0.764356	0.775001	-0.608159	-0.84186	-0.241722	WDR44	turquoise
ENSG00000131791	0.572304	0.96652	-0.363279	-0.976489	-0.582864	PRKAB2	turquoise
ENSG00000131943	0.339077	0.644271	-0.168943	-0.598156	-0.418688	C19orf12	turquoise
ENSG00000131966	0.0338736	0.861413	0.166953	-0.789719	-0.874521	ACTR10	turquoise
ENSG00000131979	-0.00634324	0.816081	0.203441	-0.727901	-0.855481	GCH1	turquoise
ENSG00000131981	0.590833	0.917382	-0.442214	-0.951341	-0.516386	LGALS3	turquoise
ENSG00000132024	-0.143498	0.691639	0.301035	-0.605294	-0.82753	CC2D1A	turquoise
ENSG00000132031	0.420727	0.938775	-0.194312	-0.897092	-0.666886	MATN3	turquoise
ENSG00000132170	0.403731	0.869362	-0.176845	-0.820139	-0.597403	PPARG	turquoise
ENSG00000132196	0.330122	0.938792	-0.109252	-0.894384	-0.734544	HSD17B7	turquoise
ENSG00000132254	0.685927	0.874005	-0.504291	-0.903429	-0.404895	ARFIP2	turquoise
ENSG00000132286	0.440833	0.918139	-0.202881	-0.895645	-0.634076	TIMM10B	turquoise
ENSG00000132294	0.790151	0.596973	-0.676955	-0.684513	-0.0298595	EFR3A	turquoise
ENSG00000132376	0.611302	0.679961	-0.520653	-0.751211	-0.260136	INPP5K	turquoise
ENSG00000132406	0.4074	0.835883	-0.183989	-0.823362	-0.556949	TMEM128	turquoise
ENSG00000132429	0.448327	0.892542	-0.248255	-0.860348	-0.591268	POPDC3	turquoise
ENSG00000132470	0.107857	0.777209	0.0156643	-0.733494	-0.740407	ITGB4	turquoise
ENSG00000132471	0.529465	0.936261	-0.326669	-0.936057	-0.582182	WBP2	turquoise
ENSG00000132589	-0.286805	0.508513	0.456018	-0.355351	-0.753469	FLOT2	turquoise
ENSG00000132635	0.0937333	0.826119	0.13078	-0.721125	-0.784026	PCED1A	turquoise
ENSG00000132688	0.0777839	0.233506	0.0707949	-0.14234	-0.17145	NES	turquoise
ENSG00000132718	0.592393	0.936438	-0.368939	-0.936199	-0.530988	SYT11	turquoise
ENSG00000132823	0.370409	0.970251	-0.166115	-0.95783	-0.735408	OSER1	turquoise
ENSG00000132825	0.543007	0.778987	-0.344322	-0.807736	-0.403365	PPP1R3D	turquoise
ENSG00000132846	0.807555	0.785541	-0.650059	-0.860816	-0.214062	ZBED3	turquoise
ENSG00000132879	0.230574	0.864995	-0.0373134	-0.838604	-0.729489	FBXO44	turquoise
ENSG00000132906	0.351626	0.863745	-0.142642	-0.825293	-0.645356	CASP9	turquoise
ENSG00000133103	0.683563	0.826759	-0.538246	-0.877732	-0.354103	COG6	turquoise
ENSG00000133112	0.413027	0.918744	-0.260627	-0.897028	-0.651485	TPT1	turquoise
ENSG00000133134	0.330953	0.984123	-0.0990318	-0.931045	-0.779147	BEX2	turquoise
ENSG00000133138	0.766883	0.665973	-0.612969	-0.72514	-0.118925	TBC1D8B	turquoise
ENSG00000133243	0.626062	0.692871	-0.569496	-0.762814	-0.268751	BTBD2	turquoise
ENSG00000133247	0.461488	0.731815	-0.304902	-0.767701	-0.427363	SUV420H2	turquoise
ENSG00000133315	-0.079564	0.693484	0.281872	-0.615194	-0.782845	MACROD1	turquoise
ENSG00000133318	0.537139	0.957326	-0.310182	-0.972443	-0.598193	RTN3	turquoise
ENSG00000133398	0.0551777	0.879112	0.163898	-0.783896	-0.872313	MED10	turquoise
ENSG00000133597	-0.235389	0.652606	0.412358	-0.544227	-0.857481	ADCK2	turquoise
ENSG00000133606	0.620992	0.825166	-0.453768	-0.885356	-0.396741	MKRN1	turquoise
ENSG00000133639	0.327263	0.967588	-0.103896	-0.927697	-0.764274	BTG1	turquoise
ENSG00000133703	0.753383	0.868968	-0.582648	-0.942557	-0.343713	KRAS	turquoise
ENSG00000133872	0.1893	0.793467	-0.0519381	-0.788551	-0.694287	SARAF	turquoise
ENSG00000133935	0.373959	0.981836	-0.142283	-0.93065	-0.743563	C14orf1	turquoise
ENSG00000134056	-0.113377	0.463948	0.223477	-0.418684	-0.563312	MRPS36	turquoise
ENSG00000134086	0.673384	0.873215	-0.467273	-0.922723	-0.411519	VHL	turquoise
ENSG00000134253	0.176046	0.819734	-0.0153982	-0.777667	-0.731198	TRIM45	turquoise
ENSG00000134265	0.58588	0.800123	-0.447382	-0.814212	-0.399902	NAPG	turquoise
ENSG00000134324	0.459556	0.917985	-0.268929	-0.917789	-0.617647	LPIN1	turquoise
ENSG00000134330	-0.312113	0.591052	0.505995	-0.454105	-0.844794	IAH1	turquoise
ENSG00000134531	0.171696	0.277773	-0.209311	-0.271128	-0.174445	EMP1	turquoise
ENSG00000134590	0.262487	0.958182	-0.0351042	-0.892411	-0.80004	FAM127A	turquoise
ENSG00000134597	-0.0616959	0.592951	0.214969	-0.540071	-0.664433	RBMX2	turquoise
ENSG00000134684	0.398398	0.83727	-0.204687	-0.789588	-0.573777	YARS	turquoise
ENSG00000134717	0.558806	0.658625	-0.459191	-0.765617	-0.277682	BTF3L4	turquoise
ENSG00000134824	0.693703	0.84981	-0.502674	-0.863348	-0.366498	FADS2	turquoise
ENSG00000134851	0.368494	0.491516	-0.241927	-0.456296	-0.239604	TMEM165	turquoise
ENSG00000135046	0.54757	0.933195	-0.394616	-0.965605	-0.568707	ANXA1	turquoise
ENSG00000135047	0.217962	0.865832	-0.0545692	-0.817348	-0.746428	CTSL	turquoise
ENSG00000135049	0.250981	0.661423	-0.161175	-0.704474	-0.502145	AGTPBP1	turquoise
ENSG00000135052	0.731213	0.7435	-0.572705	-0.806856	-0.222391	GOLM1	turquoise
ENSG00000135069	0.529974	0.978832	-0.31167	-0.983757	-0.627602	PSAT1	turquoise
ENSG00000135083	0.521979	0.911544	-0.301074	-0.896636	-0.56006	CCNJL	turquoise
ENSG00000135090	0.539884	0.847309	-0.335595	-0.863847	-0.491177	TAOK3	turquoise
ENSG00000135093	0.226127	0.75999	0.0043801	-0.722703	-0.630797	USP30	turquoise
ENSG00000135124	0.471003	0.875914	-0.282033	-0.865289	-0.56335	P2RX4	turquoise
ENSG00000135127	0.401709	0.940427	-0.174599	-0.916471	-0.678757	CCDC64	turquoise
ENSG00000135185	-0.0552721	0.725687	0.255288	-0.636159	-0.805321	TMEM243	turquoise
ENSG00000135205	0.079272	0.728689	0.0748528	-0.678314	-0.716041	CCDC146	turquoise
ENSG00000135241	0.583123	0.895697	-0.393069	-0.930152	-0.499318	PNPLA8	turquoise
ENSG00000135269	0.59565	0.941844	-0.361677	-0.946745	-0.536925	TES	turquoise
ENSG00000135334	0.610414	0.851481	-0.425144	-0.894874	-0.42568	AKIRIN2	turquoise
ENSG00000135390	-0.189246	0.573171	0.424632	-0.474369	-0.73362	ATP5G2	turquoise
ENSG00000135404	0.607644	0.688486	-0.437197	-0.678084	-0.264494	CD63	turquoise
ENSG00000135406	0.185756	0.951597	0.0614365	-0.881908	-0.851771	PRPH	turquoise
ENSG00000135452	0.409391	0.929443	-0.167807	-0.898827	-0.656862	TSPAN31	turquoise
ENSG00000135473	0.487999	0.564466	-0.395502	-0.632217	-0.234814	PAN2	turquoise
ENSG00000135506	0.478804	0.854318	-0.315963	-0.86733	-0.543071	OS9	turquoise
ENSG00000135525	0.384106	0.960892	-0.148986	-0.919889	-0.709486	MAP7	turquoise
ENSG00000135541	0.594377	0.741509	-0.46747	-0.797992	-0.327742	AHI1	turquoise
ENSG00000135596	0.229928	0.889781	-0.00336289	-0.813202	-0.759396	MICAL1	turquoise
ENSG00000135709	0.385776	0.56186	-0.248073	-0.518092	-0.298963	KIAA0513	turquoise
ENSG00000135722	0.551516	0.70479	-0.479135	-0.782584	-0.340473	FBXL8	turquoise
ENSG00000135749	0.24387	0.693748	-0.0903888	-0.634271	-0.544477	PCNXL2	turquoise
ENSG00000135842	0.514747	0.971068	-0.283931	-0.955182	-0.628192	FAM129A	turquoise
ENSG00000135924	0.531682	0.960994	-0.324388	-0.977477	-0.605149	DNAJB2	turquoise
ENSG00000135926	0.672124	0.930237	-0.469155	-0.950146	-0.468174	TMBIM1	turquoise
ENSG00000135940	-0.303919	0.652159	0.485005	-0.539293	-0.89953	COX5B	turquoise
ENSG00000135999	0.606578	0.93328	-0.393919	-0.961304	-0.519487	EPC2	turquoise
ENSG00000136002	0.199641	0.877233	-0.0428909	-0.836835	-0.770238	ARHGEF4	turquoise
ENSG00000136003	0.13106	0.925052	0.104002	-0.835778	-0.857888	ISCU	turquoise
ENSG00000136010	0.803462	0.762703	-0.623261	-0.839403	-0.197396	ALDH1L2	turquoise
ENSG00000136026	0.500607	0.90453	-0.265444	-0.865323	-0.568485	CKAP4	turquoise
ENSG00000136052	0.70133	0.608884	-0.576314	-0.667279	-0.105884	SLC41A2	turquoise
ENSG00000136059	0.233964	0.797332	-0.0173917	-0.784444	-0.658838	VILL	turquoise
ENSG00000136068	0.097413	0.892722	0.139156	-0.811656	-0.855829	FLNB	turquoise
ENSG00000136152	0.506117	0.787483	-0.333142	-0.795282	-0.455282	COG3	turquoise
ENSG00000136235	-0.0440633	0.699037	0.209707	-0.659316	-0.762058	GPNMB	turquoise
ENSG00000136238	0.638289	0.882279	-0.422235	-0.88541	-0.436308	RAC1	turquoise
ENSG00000136240	0.762869	0.851354	-0.583865	-0.894865	-0.32336	KDELR2	turquoise
ENSG00000136274	0.193353	0.892999	0.0508538	-0.829203	-0.776547	NACAD	turquoise
ENSG00000136436	0.679524	0.802151	-0.490892	-0.876401	-0.329494	CALCOCO2	turquoise
ENSG00000136444	0.245436	0.794383	-0.0774561	-0.722805	-0.638278	RSAD1	turquoise
ENSG00000136628	0.442989	0.953309	-0.259267	-0.931548	-0.663993	EPRS	turquoise
ENSG00000136643	0.602545	0.904366	-0.419218	-0.918403	-0.489098	RPS6KC1	turquoise
ENSG00000136710	0.190738	0.879678	0.006994	-0.826211	-0.776148	CCDC115	turquoise
ENSG00000136717	0.141729	0.925788	0.0645744	-0.851405	-0.855169	BIN1	turquoise
ENSG00000136783	0.253027	0.794923	-0.0886563	-0.808158	-0.638974	NIPSNAP3A	turquoise
ENSG00000136802	0.381473	0.890794	-0.194221	-0.847337	-0.651107	LRRC8A	turquoise
ENSG00000136807	0.610131	0.872366	-0.443805	-0.920083	-0.45108	CDK9	turquoise
ENSG00000136810	-0.453881	0.406294	0.568601	-0.248213	-0.749452	TXN	turquoise
ENSG00000136826	0.439062	0.989572	-0.21715	-0.970003	-0.702738	KLF4	turquoise
ENSG00000136830	0.0457773	0.37412	-0.00954482	-0.292489	-0.361142	FAM129B	turquoise
ENSG00000136840	0.327124	0.898476	-0.118292	-0.873982	-0.695777	ST6GALNAC4	turquoise
ENSG00000136842	0.38492	0.45746	-0.211281	-0.467262	-0.170708	TMOD1	turquoise
ENSG00000136854	0.496441	0.938149	-0.287624	-0.939675	-0.611734	STXBP1	turquoise
ENSG00000136868	0.675278	0.902862	-0.513725	-0.940264	-0.44383	SLC31A1	turquoise
ENSG00000136878	0.174981	0.740516	0.0229002	-0.726268	-0.640738	USP20	turquoise
ENSG00000136888	0.452333	0.942542	-0.240396	-0.93741	-0.642472	ATP6V1G1	turquoise
ENSG00000136935	0.468991	0.630856	-0.289319	-0.644951	-0.301943	GOLGA1	turquoise
ENSG00000137070	-0.483478	0.386781	0.619171	-0.237249	-0.769274	IL11RA	turquoise
ENSG00000137103	0.538981	0.868392	-0.339803	-0.87758	-0.498653	TMEM8B	turquoise
ENSG00000137133	-0.0675027	0.823279	0.294213	-0.706365	-0.898924	HINT2	turquoise
ENSG00000137171	0.23131	0.889855	-0.0348838	-0.864595	-0.754734	KLC4	turquoise
ENSG00000137193	0.691024	0.75301	-0.526842	-0.832174	-0.27581	PIM1	turquoise
ENSG00000137216	0.700138	0.647822	-0.557753	-0.715312	-0.157699	TMEM63B	turquoise
ENSG00000137285	0.381342	0.886672	-0.145063	-0.860329	-0.631841	TUBB2B	turquoise
ENSG00000137364	0.383088	0.810828	-0.21275	-0.783849	-0.567916	TPMT	turquoise
ENSG00000137414	0.504379	0.905885	-0.348604	-0.910921	-0.578958	FAM8A1	turquoise
ENSG00000137474	0.46243	0.967351	-0.234014	-0.941237	-0.658921	MYO7A	turquoise
ENSG00000137494	0.39065	0.751131	-0.193213	-0.77526	-0.493898	ANKRD42	turquoise
ENSG00000137500	0.373799	0.911448	-0.144559	-0.882249	-0.66867	CCDC90B	turquoise
ENSG00000137575	0.624694	0.773042	-0.411723	-0.808156	-0.333828	SDCBP	turquoise
ENSG00000137764	0.555188	0.799406	-0.393038	-0.823638	-0.41855	MAP2K5	turquoise
ENSG00000137817	0.451345	0.866386	-0.227512	-0.8501	-0.564937	PARP6	turquoise
ENSG00000137818	0.0898926	0.836113	0.159422	-0.745319	-0.802602	RPLP1	turquoise
ENSG00000137876	0.408915	0.976846	-0.184219	-0.955186	-0.713352	RSL24D1	turquoise
ENSG00000137947	0.267942	0.90376	-0.0408664	-0.853861	-0.73673	GTF2B	turquoise
ENSG00000137996	0.0896493	0.651518	0.0934365	-0.547045	-0.6035	RTCA	turquoise
ENSG00000138029	0.0705676	0.746639	0.0657268	-0.705609	-0.717812	HADHB	turquoise
ENSG00000138030	-0.206639	0.585262	0.345913	-0.477239	-0.763803	KHK	turquoise
ENSG00000138036	-0.128334	0.699302	0.247911	-0.633578	-0.826622	DYNC2LI1	turquoise
ENSG00000138069	0.56003	0.860966	-0.3602	-0.85626	-0.479168	RAB1A	turquoise
ENSG00000138078	0.574302	0.914313	-0.401794	-0.93931	-0.529766	PREPL	turquoise
ENSG00000138162	0.545688	0.832382	-0.343046	-0.871574	-0.458798	TACC2	turquoise
ENSG00000138166	0.252865	0.723502	-0.0617641	-0.626616	-0.558376	DUSP5	turquoise
ENSG00000138172	0.633714	0.826613	-0.431403	-0.837511	-0.383002	CALHM2	turquoise
ENSG00000138175	-0.380494	0.553988	0.591914	-0.423159	-0.848035	ARL3	turquoise
ENSG00000138286	0.520707	0.947594	-0.324464	-0.951238	-0.593272	FAM149B1	turquoise
ENSG00000138347	0.840446	0.760182	-0.703351	-0.845933	-0.167009	MYPN	turquoise
ENSG00000138413	0.338335	0.988695	-0.113493	-0.939446	-0.777446	IDH1	turquoise
ENSG00000138433	0.257374	0.899013	-0.0369375	-0.881477	-0.752275	CIR1	turquoise
ENSG00000138439	0.39652	0.386231	-0.345264	-0.4469	-0.0956977	FAM117B	turquoise
ENSG00000138459	0.771474	0.608491	-0.661449	-0.731445	-0.0669226	SLC35A5	turquoise
ENSG00000138463	0.520364	0.915232	-0.298362	-0.926912	-0.567622	DIRC2	turquoise
ENSG00000138468	0.488255	0.817337	-0.281735	-0.820064	-0.488979	SENP7	turquoise
ENSG00000138592	0.449871	0.396577	-0.39198	-0.419717	-0.0777425	USP8	turquoise
ENSG00000138617	0.376592	0.884706	-0.201815	-0.867495	-0.638766	PARP16	turquoise
ENSG00000138623	0.112436	0.526679	-0.0206273	-0.438117	-0.472663	SEMA7A	turquoise
ENSG00000138629	-0.443379	0.237575	0.55793	-0.147078	-0.559638	UBL7	turquoise
ENSG00000138678	0.500575	0.966648	-0.304443	-0.964381	-0.63395	AGPAT9	turquoise
ENSG00000138685	0.302358	0.236775	-0.315204	-0.223212	-0.0318514	FGF2	turquoise
ENSG00000138764	0.51096	0.705215	-0.445215	-0.776489	-0.351273	CCNG2	turquoise
ENSG00000138768	0.739661	0.615413	-0.643946	-0.709452	-0.103322	USO1	turquoise
ENSG00000138834	0.355579	0.839274	-0.160503	-0.82351	-0.62439	MAPK8IP3	turquoise
ENSG00000139112	0.521973	0.915056	-0.334281	-0.935999	-0.560849	GABARAPL1	turquoise
ENSG00000139160	0.0143362	0.79821	0.232422	-0.686872	-0.812201	METTL20	turquoise
ENSG00000139168	0.215372	0.782643	0.0127504	-0.756367	-0.657878	ZCRB1	turquoise
ENSG00000139182	0.371363	0.774385	-0.256026	-0.789298	-0.539651	CLSTN3	turquoise
ENSG00000139239	-0.174362	0.65647	0.319428	-0.606934	-0.825412	RPL14P1	turquoise
ENSG00000139266	0.195315	0.873162	-0.0132196	-0.8235	-0.758755	2020-03-09	turquoise
ENSG00000139370	0.49081	0.840771	-0.264719	-0.846976	-0.510265	SLC15A4	turquoise
ENSG00000139410	0.166527	0.842064	0.0561019	-0.790056	-0.750405	SDSL	turquoise
ENSG00000139428	0.176425	0.847896	0.0228802	-0.764775	-0.754359	MMAB	turquoise
ENSG00000139433	0.28312	0.750376	-0.117576	-0.700038	-0.568621	GLTP	turquoise
ENSG00000139505	0.770499	0.619266	-0.64707	-0.703093	-0.0764538	MTMR6	turquoise
ENSG00000139641	0.354896	0.937676	-0.122772	-0.897511	-0.708224	ESYT1	turquoise
ENSG00000139722	0.409395	0.83538	-0.168735	-0.788129	-0.556521	VPS37B	turquoise
ENSG00000139725	0.546229	0.978064	-0.326827	-0.9761	-0.613522	RHOF	turquoise
ENSG00000139800	0.011563	0.691318	0.225762	-0.565875	-0.704865	ZIC5	turquoise
ENSG00000140044	0.325957	0.874662	-0.110715	-0.830961	-0.670228	JDP2	turquoise
ENSG00000140105	0.370461	0.808159	-0.276553	-0.828139	-0.577371	WARS	turquoise
ENSG00000140157	0.728589	0.70945	-0.529302	-0.769589	-0.199419	NIPA2	turquoise
ENSG00000140264	0.189791	0.953934	0.0609968	-0.874988	-0.851288	SERF2	turquoise
ENSG00000140280	0.0241751	0.684631	0.174734	-0.585805	-0.67868	LYSMD2	turquoise
ENSG00000140319	0.135403	0.758268	0.0196643	-0.75069	-0.701774	SRP14	turquoise
ENSG00000140367	0.381524	0.577995	-0.252116	-0.562147	-0.308429	UBE2Q2	turquoise
ENSG00000140400	0.0478687	0.65493	0.116009	-0.592489	-0.657399	MAN2C1	turquoise
ENSG00000140455	0.424822	0.847391	-0.20815	-0.848331	-0.575726	USP3	turquoise
ENSG00000140519	0.321404	0.961001	-0.0790423	-0.913336	-0.755655	RHCG	turquoise
ENSG00000140553	-0.0484066	0.658329	0.262736	-0.552213	-0.719291	UNC45A	turquoise
ENSG00000140682	0.419253	0.789337	-0.222439	-0.749853	-0.506976	TGFB1I1	turquoise
ENSG00000140688	0.642835	0.666423	-0.516465	-0.730859	-0.224572	C16orf58	turquoise
ENSG00000140941	0.478565	0.983331	-0.275991	-0.972787	-0.668687	MAP1LC3B	turquoise
ENSG00000140943	0.736795	0.619411	-0.657188	-0.732537	-0.111544	MBTPS1	turquoise
ENSG00000140950	0.476317	0.674527	-0.305691	-0.686978	-0.354091	TLDC1	turquoise
ENSG00000140961	0.434413	0.980254	-0.21911	-0.965607	-0.699193	OSGIN1	turquoise
ENSG00000141179	0.140161	0.828698	0.0600723	-0.770901	-0.765503	PCTP	turquoise
ENSG00000141198	0.618516	0.869767	-0.450142	-0.895068	-0.442118	TOM1L1	turquoise
ENSG00000141258	0.299519	0.694108	-0.189232	-0.706375	-0.501783	SGSM2	turquoise
ENSG00000141295	0.0143999	0.664669	0.188503	-0.591943	-0.683518	SCRN2	turquoise
ENSG00000141337	0.292474	0.264087	-0.210756	-0.259145	-0.0721919	ARSG	turquoise
ENSG00000141391	0.563193	0.938002	-0.376748	-0.95106	-0.555693	SLMO1	turquoise
ENSG00000141446	0.456808	0.935803	-0.282097	-0.946205	-0.641955	ESCO1	turquoise
ENSG00000141458	0.594192	0.866704	-0.424463	-0.8873	-0.461685	NPC1	turquoise
ENSG00000141504	0.0620239	0.809653	0.112134	-0.74552	-0.795354	SAT2	turquoise
ENSG00000141519	0.0310363	0.686249	0.147092	-0.61965	-0.684432	CCDC40	turquoise
ENSG00000141574	0.327928	0.737368	-0.202379	-0.783251	-0.526761	SECTM1	turquoise
ENSG00000141582	0.28571	0.938534	-0.0272209	-0.87181	-0.759368	CBX4	turquoise
ENSG00000141665	0.0145433	0.669628	0.198206	-0.614962	-0.68398	FBXO15	turquoise
ENSG00000141682	0.266072	0.841667	-0.0162491	-0.78148	-0.675632	PMAIP1	turquoise
ENSG00000141741	-0.18208	0.770477	0.393496	-0.660569	-0.938588	MIEN1	turquoise
ENSG00000141756	0.568954	0.545969	-0.540571	-0.616492	-0.16383	FKBP10	turquoise
ENSG00000141933	-0.396748	0.450065	0.558268	-0.351868	-0.766993	TPGS1	turquoise
ENSG00000141971	-0.115808	0.779985	0.3051	-0.670399	-0.897898	MVB12A	turquoise
ENSG00000141985	0.148886	0.710491	-0.0132651	-0.676338	-0.643594	SH3GL1	turquoise
ENSG00000142102	0.405662	0.910938	-0.195775	-0.88282	-0.651234	ATHL1	turquoise
ENSG00000142156	0.297044	0.858159	-0.155785	-0.86273	-0.680155	COL6A1	turquoise
ENSG00000142186	-0.394285	0.495678	0.568133	-0.36679	-0.799146	SCYL1	turquoise
ENSG00000142227	0.443596	0.961721	-0.245355	-0.965214	-0.675707	EMP3	turquoise
ENSG00000142327	0.256183	0.96065	-0.0309696	-0.895014	-0.807838	RNPEPL1	turquoise
ENSG00000142330	0.0486469	0.385797	0.0574156	-0.299376	-0.360637	CAPN10	turquoise
ENSG00000142530	0.267951	0.81077	-0.0611979	-0.765662	-0.631167	FAM71E1	turquoise
ENSG00000142534	-0.209631	0.685546	0.3545	-0.584204	-0.870325	RPS11	turquoise
ENSG00000142541	-0.187751	0.68553	0.29958	-0.616956	-0.860469	RPL13A	turquoise
ENSG00000142632	0.0740789	0.683015	0.0556752	-0.639065	-0.659875	ARHGEF19	turquoise
ENSG00000142657	0.611545	0.933853	-0.413786	-0.964538	-0.520018	PGD	turquoise
ENSG00000142669	0.444995	0.974315	-0.219189	-0.93944	-0.684692	SH3BGRL3	turquoise
ENSG00000142675	0.551906	0.847331	-0.3418	-0.860154	-0.469927	CNKSR1	turquoise
ENSG00000142676	-0.263758	0.567216	0.404987	-0.482236	-0.781168	RPL11	turquoise
ENSG00000142686	0.0809518	0.891917	0.158025	-0.792912	-0.86501	C1orf216	turquoise
ENSG00000142733	-0.358405	0.503797	0.527056	-0.342193	-0.791099	MAP3K6	turquoise
ENSG00000142765	0.331857	0.872495	-0.156699	-0.873782	-0.668025	SYTL1	turquoise
ENSG00000142784	0.608679	0.891727	-0.432625	-0.921878	-0.481668	WDTC1	turquoise
ENSG00000142867	0.333559	0.851904	-0.1545	-0.792373	-0.643798	BCL10	turquoise
ENSG00000142875	0.635739	0.908548	-0.463677	-0.938551	-0.480571	PRKACB	turquoise
ENSG00000142961	0.482645	0.900366	-0.260996	-0.912562	-0.576587	MOB3C	turquoise
ENSG00000143013	0.287815	0.956102	-0.0497867	-0.902463	-0.782336	LMO4	turquoise
ENSG00000143126	0.50005	0.626255	-0.336032	-0.717498	-0.284179	CELSR2	turquoise
ENSG00000143158	-0.165096	0.681285	0.311831	-0.58524	-0.832317	MPC2	turquoise
ENSG00000143164	0.427115	0.642769	-0.32789	-0.719514	-0.361407	DCAF6	turquoise
ENSG00000143198	0.422992	0.941196	-0.223005	-0.925662	-0.664011	MGST3	turquoise
ENSG00000143222	0.28022	0.90005	-0.0320554	-0.869464	-0.734055	UFC1	turquoise
ENSG00000143224	0.261488	0.86555	-0.0801639	-0.853181	-0.712883	PPOX	turquoise
ENSG00000143256	-0.00214822	0.820779	0.231611	-0.681458	-0.851304	PFDN2	turquoise
ENSG00000143320	0.628874	0.888176	-0.406145	-0.938303	-0.453464	CRABP2	turquoise
ENSG00000143353	0.0694843	0.784851	0.13589	-0.699844	-0.766152	LYPLAL1	turquoise
ENSG00000143367	0.625083	0.697206	-0.464451	-0.781441	-0.259738	TUFT1	turquoise
ENSG00000143369	0.17563	0.856729	0.00579212	-0.779592	-0.764648	ECM1	turquoise
ENSG00000143382	0.187458	0.751894	-0.0645326	-0.755469	-0.64184	ADAMTSL4	turquoise
ENSG00000143393	0.606461	0.847949	-0.398981	-0.887213	-0.426989	PI4KB	turquoise
ENSG00000143409	0.0597292	0.757558	0.156219	-0.695872	-0.739763	FAM63A	turquoise
ENSG00000143420	-0.0401396	0.615869	0.221336	-0.518123	-0.66626	ENSA	turquoise
ENSG00000143457	0.740382	0.833666	-0.59445	-0.911017	-0.322117	GOLPH3L	turquoise
ENSG00000143512	0.462445	0.861064	-0.26747	-0.896869	-0.561601	HHIPL2	turquoise
ENSG00000143543	0.315329	0.81727	-0.135398	-0.777102	-0.613967	JTB	turquoise
ENSG00000143545	0.12036	0.758485	0.022548	-0.76386	-0.706519	RAB13	turquoise
ENSG00000143553	-0.236698	0.581439	0.414703	-0.488864	-0.776443	SNAPIN	turquoise
ENSG00000143575	-0.184513	0.728474	0.374432	-0.591856	-0.88643	HAX1	turquoise
ENSG00000143590	-0.0735026	0.099941	0.0868604	-0.14844	-0.149711	EFNA3	turquoise
ENSG00000143612	0.724168	0.709188	-0.577088	-0.773566	-0.199256	C1orf43	turquoise
ENSG00000143669	0.661064	0.817108	-0.47374	-0.864272	-0.360861	LYST	turquoise
ENSG00000143674	0.526221	0.745633	-0.377065	-0.767719	-0.389469	MLK4	turquoise
ENSG00000143772	0.326141	0.617595	-0.163295	-0.538751	-0.407242	ITPKB	turquoise
ENSG00000143797	0.596776	0.608512	-0.473342	-0.683139	-0.194045	MBOAT2	turquoise
ENSG00000143801	0.181406	0.60307	-0.015648	-0.519405	-0.491451	PSEN2	turquoise
ENSG00000143816	0.374296	0.932827	-0.127401	-0.901641	-0.687564	WNT9A	turquoise
ENSG00000143819	0.560029	0.962444	-0.356837	-0.989445	-0.586953	EPHX1	turquoise
ENSG00000143878	0.42748	0.986571	-0.20172	-0.954348	-0.708542	RHOB	turquoise
ENSG00000144048	0.303012	0.915152	-0.106057	-0.894777	-0.732977	DUSP11	turquoise
ENSG00000144115	0.308758	0.923619	-0.0636804	-0.892141	-0.727811	THNSL2	turquoise
ENSG00000144134	0.439599	0.796046	-0.282902	-0.791825	-0.501363	RABL2A	turquoise
ENSG00000144199	0.168648	0.794814	0.0302532	-0.773712	-0.698488	FAHD2B	turquoise
ENSG00000144233	0.553792	0.905635	-0.358119	-0.946667	-0.532905	AMMECR1L	turquoise
ENSG00000144362	-0.358478	0.545702	0.487081	-0.440826	-0.842173	PHOSPHO2	turquoise
ENSG00000144455	0.424378	0.750972	-0.235966	-0.776777	-0.467765	SUMF1	turquoise
ENSG00000144485	-0.18202	0.735604	0.373742	-0.591815	-0.904568	HES6	turquoise
ENSG00000144567	0.571971	0.898087	-0.399251	-0.924861	-0.511841	FAM134A	turquoise
ENSG00000144655	0.337127	0.853423	-0.149645	-0.804398	-0.648441	CSRNP1	turquoise
ENSG00000144659	0.333682	0.908512	-0.0963504	-0.893433	-0.692134	SLC25A38	turquoise
ENSG00000144681	0.573826	0.784639	-0.403986	-0.831746	-0.396999	STAC	turquoise
ENSG00000144713	-0.506806	0.348472	0.582945	-0.232106	-0.727596	RPL32	turquoise
ENSG00000144746	0.542644	0.677865	-0.360134	-0.740915	-0.299779	ARL6IP5	turquoise
ENSG00000144815	0.241197	0.922436	-0.0112838	-0.862296	-0.783071	NXPE3	turquoise
ENSG00000144867	0.611448	0.519166	-0.541247	-0.541474	-0.091272	SRPRB	turquoise
ENSG00000144909	0.620423	0.724846	-0.455974	-0.760756	-0.28785	OSBPL11	turquoise
ENSG00000144935	0.557302	0.604008	-0.423837	-0.646196	-0.216663	TRPC1	turquoise
ENSG00000145014	0.238424	0.943381	-0.0218784	-0.893309	-0.806217	TMEM44	turquoise
ENSG00000145020	-0.157918	0.656477	0.323213	-0.568219	-0.800769	AMT	turquoise
ENSG00000145022	0.543317	0.958079	-0.31681	-0.96064	-0.593084	TCTA	turquoise
ENSG00000145050	-0.354109	0.252309	0.430172	-0.0861653	-0.522912	MANF	turquoise
ENSG00000145247	0.133268	0.86414	0.065625	-0.772923	-0.804099	OCIAD2	turquoise
ENSG00000145349	0.723905	0.820929	-0.535038	-0.891162	-0.313137	CAMK2D	turquoise
ENSG00000145362	0.588899	0.799035	-0.447202	-0.841686	-0.403339	ANK2	turquoise
ENSG00000145390	0.590139	0.888497	-0.427473	-0.897723	-0.489192	USP53	turquoise
ENSG00000145425	-0.27807	0.579178	0.416522	-0.435471	-0.79916	RPS3A	turquoise
ENSG00000145545	0.330414	0.679137	-0.228135	-0.70839	-0.466695	SRD5A1	turquoise
ENSG00000145592	0.124244	0.90505	0.053947	-0.832053	-0.849776	RPL37	turquoise
ENSG00000145730	0.310054	0.801695	-0.170982	-0.816035	-0.610344	PAM	turquoise
ENSG00000145743	0.71422	0.513377	-0.670412	-0.634449	0.00138892	FBXL17	turquoise
ENSG00000145782	0.40692	0.835013	-0.235345	-0.828732	-0.570526	ATG12	turquoise
ENSG00000145817	0.780497	0.792848	-0.665192	-0.863089	-0.248824	YIPF5	turquoise
ENSG00000145860	0.405525	0.934424	-0.172348	-0.892241	-0.672536	RNF145	turquoise
ENSG00000145882	0.34209	0.953059	-0.112554	-0.903733	-0.741778	PCYOX1L	turquoise
ENSG00000145911	0.261471	0.836827	-0.0153258	-0.776401	-0.671412	N4BP3	turquoise
ENSG00000145919	0.148897	0.787042	0.00358352	-0.740306	-0.7084	BOD1	turquoise
ENSG00000146007	-0.0846221	0.604085	0.216203	-0.593035	-0.695721	ZMAT2	turquoise
ENSG00000146066	-0.300502	0.641834	0.492865	-0.524647	-0.882392	HIGD2A	turquoise
ENSG00000146072	0.390556	0.430407	-0.249165	-0.370168	-0.156993	TNFRSF21	turquoise
ENSG00000146085	0.363791	0.96061	-0.174084	-0.950389	-0.736086	MUT	turquoise
ENSG00000146242	-0.118832	0.28104	0.285793	-0.153374	-0.362485	TPBG	turquoise
ENSG00000146278	0.221175	0.786445	-0.098205	-0.787933	-0.652247	PNRC1	turquoise
ENSG00000146386	0.117355	0.818963	0.12707	-0.734245	-0.754699	ABRACL	turquoise
ENSG00000146409	-0.25883	0.443273	0.319766	-0.345835	-0.663321	SLC18B1	turquoise
ENSG00000146416	0.283566	0.914946	-0.0618315	-0.839619	-0.741658	AIG1	turquoise
ENSG00000146425	-0.00949599	0.869647	0.227406	-0.765759	-0.905024	DYNLT1	turquoise
ENSG00000146540	-0.00972978	0.858201	0.249945	-0.77059	-0.901068	C7orf50	turquoise
ENSG00000146555	0.710309	0.853181	-0.530948	-0.897705	-0.353806	SDK1	turquoise
ENSG00000146592	0.590786	0.851844	-0.426253	-0.876758	-0.446676	CREB5	turquoise
ENSG00000146678	0.238729	0.805308	0.00835973	-0.725405	-0.649142	IGFBP1	turquoise
ENSG00000146830	0.32364	0.727303	-0.187374	-0.731876	-0.521879	GIGYF1	turquoise
ENSG00000146833	0.677484	0.839633	-0.498501	-0.898899	-0.375235	TRIM4	turquoise
ENSG00000147119	0.412321	0.835968	-0.209484	-0.803034	-0.558979	CHST7	turquoise
ENSG00000147155	0.310847	0.972982	-0.0838319	-0.91274	-0.782518	EBP	turquoise
ENSG00000147162	0.640698	0.785267	-0.551073	-0.838017	-0.354405	OGT	turquoise
ENSG00000147164	0.609226	0.608191	-0.487258	-0.642524	-0.192907	SNX12	turquoise
ENSG00000147202	0.643992	0.640796	-0.434666	-0.705596	-0.179479	DIAPH2	turquoise
ENSG00000147383	0.286497	0.928061	-0.0546338	-0.848507	-0.750416	NSDHL	turquoise
ENSG00000147400	0.247958	0.941849	-0.0285124	-0.861814	-0.796886	CETN2	turquoise
ENSG00000147403	0.154404	0.921635	0.0642292	-0.84564	-0.840974	RPL10	turquoise
ENSG00000147535	0.14804	0.83435	0.0203156	-0.777909	-0.760532	PPAPDC1B	turquoise
ENSG00000147642	0.546841	0.697452	-0.395823	-0.736266	-0.316458	SYBU	turquoise
ENSG00000147677	0.745588	0.69966	-0.614937	-0.809841	-0.176105	EIF3H	turquoise
ENSG00000147905	0.770348	0.686407	-0.635744	-0.757881	-0.137885	ZCCHC7	turquoise
ENSG00000148180	0.521483	0.975661	-0.30458	-0.967576	-0.632428	GSN	turquoise
ENSG00000148341	0.205844	0.869246	-0.0196622	-0.828953	-0.760212	SH3GLB2	turquoise
ENSG00000148346	-0.164077	0.624297	0.331173	-0.498263	-0.761763	LCN2	turquoise
ENSG00000148396	-0.074184	0.732871	0.302903	-0.60659	-0.812312	SEC16A	turquoise
ENSG00000148399	0.127623	0.864164	0.0877093	-0.803218	-0.813388	DPH7	turquoise
ENSG00000148484	0.343254	0.606991	-0.281934	-0.592126	-0.379748	RSU1	turquoise
ENSG00000148572	0.195272	0.92369	0.0218412	-0.870712	-0.81803	NRBF2	turquoise
ENSG00000148719	0.101779	0.575685	0.0668556	-0.567629	-0.51052	DNAJB12	turquoise
ENSG00000148814	0.092988	0.838124	0.114373	-0.774412	-0.795581	LRRC27	turquoise
ENSG00000148908	0.158463	0.892818	0.0513492	-0.837186	-0.814002	RGS10	turquoise
ENSG00000149084	0.24162	0.830475	-0.0608166	-0.752621	-0.692548	HSD17B12	turquoise
ENSG00000149115	0.399077	0.93399	-0.162548	-0.91575	-0.66782	TNKS1BP1	turquoise
ENSG00000149218	0.384503	0.61531	-0.205371	-0.547362	-0.351689	ENDOD1	turquoise
ENSG00000149243	0.397395	0.917547	-0.17703	-0.887243	-0.648942	KLHL35	turquoise
ENSG00000149273	-0.0512266	0.303442	0.155885	-0.333878	-0.35671	RPS3	turquoise
ENSG00000149531	0.651429	0.722116	-0.483107	-0.766332	-0.268191	FRG1B	turquoise
ENSG00000149599	0.365868	0.971653	-0.143139	-0.947425	-0.737327	DUSP15	turquoise
ENSG00000149600	0.527023	0.831832	-0.316313	-0.823152	-0.47	COMMD7	turquoise
ENSG00000149657	0.445992	0.534659	-0.334109	-0.632528	-0.219218	LSM14B	turquoise
ENSG00000149809	0.301034	0.928736	-0.107057	-0.87929	-0.748231	TM7SF2	turquoise
ENSG00000149823	0.482124	0.819358	-0.261364	-0.861609	-0.492418	VPS51	turquoise
ENSG00000149930	0.132235	0.777328	0.116258	-0.699763	-0.714766	TAOK2	turquoise
ENSG00000149932	0.127901	0.94408	0.111227	-0.864467	-0.887022	TMEM219	turquoise
ENSG00000150281	0.32018	0.869861	-0.174731	-0.861664	-0.673547	CTF1	turquoise
ENSG00000150403	0.542583	0.913572	-0.330475	-0.924915	-0.54043	TMCO3	turquoise
ENSG00000150527	0.450785	0.943612	-0.253049	-0.946601	-0.651946	CTAGE5	turquoise
ENSG00000150593	0.460407	0.887358	-0.308347	-0.933209	-0.585276	PDCD4	turquoise
ENSG00000150782	-0.122689	0.590537	0.313662	-0.464992	-0.703615	IL18	turquoise
ENSG00000150961	0.484684	0.857425	-0.324682	-0.872041	-0.544921	SEC24D	turquoise
ENSG00000150977	-0.0460139	0.589591	0.182079	-0.544516	-0.641892	RILPL2	turquoise
ENSG00000150991	0.658341	0.662362	-0.543955	-0.752921	-0.202457	UBC	turquoise
ENSG00000151012	0.613716	0.946086	-0.404791	-0.962402	-0.531191	SLC7A11	turquoise
ENSG00000151135	0.715842	0.871474	-0.550139	-0.905259	-0.376307	TMEM263	turquoise
ENSG00000151292	0.493252	0.659379	-0.36237	-0.708192	-0.335504	CSNK1G3	turquoise
ENSG00000151327	0.622984	0.816834	-0.447165	-0.84684	-0.392118	FAM177A1	turquoise
ENSG00000151445	0.705922	0.556876	-0.621838	-0.645736	-0.04567	VIPAS39	turquoise
ENSG00000151498	-0.318183	0.442823	0.471417	-0.342861	-0.699934	ACAD8	turquoise
ENSG00000151500	-0.146462	0.694329	0.371132	-0.594307	-0.825945	THYN1	turquoise
ENSG00000151552	-0.0803742	0.74613	0.255773	-0.661149	-0.83393	QDPR	turquoise
ENSG00000151553	0.0444772	0.824198	0.172648	-0.713584	-0.826033	FAM160B1	turquoise
ENSG00000151690	0.66618	0.901777	-0.485583	-0.947663	-0.446665	MFSD6	turquoise
ENSG00000151694	0.603909	0.955385	-0.409317	-0.976596	-0.544941	ADAM17	turquoise
ENSG00000151746	0.667841	0.780773	-0.517111	-0.818759	-0.320273	BICD1	turquoise
ENSG00000151779	-0.281463	0.422413	0.448312	-0.324943	-0.649552	NBAS	turquoise
ENSG00000151846	0.437544	0.911363	-0.270521	-0.912787	-0.621339	PABPC3	turquoise
ENSG00000151881	0.572046	0.701681	-0.413084	-0.741082	-0.298968	C5orf28	turquoise
ENSG00000151917	0.669327	0.795657	-0.490227	-0.836111	-0.333437	BEND6	turquoise
ENSG00000152137	0.535682	0.956715	-0.305101	-0.965742	-0.598245	HSPB8	turquoise
ENSG00000152219	0.512287	0.599535	-0.376157	-0.654206	-0.231812	ARL14EP	turquoise
ENSG00000152409	0.619721	0.824881	-0.456572	-0.878759	-0.399821	JMY	turquoise
ENSG00000152492	0.452921	0.839673	-0.211231	-0.794327	-0.525506	CCDC50	turquoise
ENSG00000152518	0.424816	0.739216	-0.194577	-0.770783	-0.456233	ZFP36L2	turquoise
ENSG00000152620	0.23469	0.639445	-0.0950608	-0.670675	-0.489584	NADK2	turquoise
ENSG00000152669	-0.227382	0.69929	0.409875	-0.56662	-0.895264	CCNO	turquoise
ENSG00000152684	0.0323619	0.84452	0.177744	-0.748286	-0.852042	PELO	turquoise
ENSG00000152700	0.680454	0.778219	-0.557189	-0.825192	-0.312944	SAR1B	turquoise
ENSG00000152749	0.638872	0.738564	-0.480737	-0.765386	-0.29111	GPR180	turquoise
ENSG00000152904	0.398887	0.833835	-0.175275	-0.819848	-0.58003	GGPS1	turquoise
ENSG00000153113	0.819105	0.770449	-0.699323	-0.85762	-0.199425	CAST	turquoise
ENSG00000153130	-0.145881	0.300713	0.258835	-0.173363	-0.401313	SCOC	turquoise
ENSG00000153132	0.266379	0.973795	-0.0297892	-0.906373	-0.814447	CLGN	turquoise
ENSG00000153162	0.254572	0.788438	-0.0397245	-0.682908	-0.628113	BMP6	turquoise
ENSG00000153214	0.626815	0.77655	-0.496458	-0.835119	-0.346963	TMEM87B	turquoise
ENSG00000153404	0.274904	0.799843	-0.0493373	-0.803872	-0.632724	PLEKHG4B	turquoise
ENSG00000153558	0.256134	0.788158	-0.102039	-0.757961	-0.637025	FBXL2	turquoise
ENSG00000153714	0.419925	0.989339	-0.191795	-0.968268	-0.716635	LURAP1L	turquoise
ENSG00000153721	0.276632	0.781398	-0.107473	-0.778894	-0.605368	CNKSR3	turquoise
ENSG00000153790	0.330439	0.762592	-0.128981	-0.748038	-0.54413	C7orf31	turquoise
ENSG00000153823	-0.123985	0.634277	0.278778	-0.535109	-0.76169	PID1	turquoise
ENSG00000153832	0.374944	0.809433	-0.193729	-0.799471	-0.56831	FBXO36	turquoise
ENSG00000153879	0.457859	0.995032	-0.233718	-0.978462	-0.696125	CEBPG	turquoise
ENSG00000154027	0.0924813	0.692661	0.0575165	-0.607863	-0.648807	AK5	turquoise
ENSG00000154114	0.669338	0.696294	-0.538812	-0.782298	-0.229179	TBCEL	turquoise
ENSG00000154134	0.140632	0.794263	0.0221129	-0.746624	-0.710752	ROBO3	turquoise
ENSG00000154144	0.519147	0.832175	-0.311713	-0.835024	-0.482427	TBRG1	turquoise
ENSG00000154153	0.527542	0.864461	-0.356673	-0.871317	-0.506124	FAM134B	turquoise
ENSG00000154305	0.506554	0.83185	-0.303195	-0.847155	-0.490935	MIA3	turquoise
ENSG00000154309	0.552119	0.941796	-0.341561	-0.952449	-0.571434	DISP1	turquoise
ENSG00000154359	0.198285	0.843734	0.0205471	-0.788346	-0.730395	LONRF1	turquoise
ENSG00000154370	0.051061	0.753223	0.161859	-0.696103	-0.748077	TRIM11	turquoise
ENSG00000154639	0.750017	0.664748	-0.610772	-0.745653	-0.12898	CXADR	turquoise
ENSG00000154813	0.121743	0.76561	0.121809	-0.664543	-0.700334	DPH3	turquoise
ENSG00000154917	0.491952	0.806625	-0.315782	-0.799625	-0.469814	RAB6B	turquoise
ENSG00000154930	0.66318	0.751284	-0.489547	-0.826997	-0.287199	ACSS1	turquoise
ENSG00000154945	0.770146	0.864975	-0.600714	-0.922772	-0.331641	ANKRD40	turquoise
ENSG00000154957	-0.157064	0.618202	0.359102	-0.490683	-0.752545	ZNF18	turquoise
ENSG00000155016	0.4555	0.618136	-0.39123	-0.701811	-0.313233	CYP2U1	turquoise
ENSG00000155158	-0.319829	0.551717	0.463937	-0.451748	-0.817208	TTC39B	turquoise
ENSG00000155252	0.444446	0.810577	-0.23852	-0.754629	-0.507954	PI4K2A	turquoise
ENSG00000155254	0.528957	0.723265	-0.373642	-0.705575	-0.36273	MARVELD1	turquoise
ENSG00000155265	0.0340077	0.594135	0.17908	-0.46317	-0.584965	GOLGA7B	turquoise
ENSG00000155287	0.1241	0.775875	0.0742605	-0.712119	-0.70964	SLC25A28	turquoise
ENSG00000155304	0.615253	0.947757	-0.414655	-0.967013	-0.532027	HSPA13	turquoise
ENSG00000155313	0.506208	0.858053	-0.333168	-0.888224	-0.522712	USP25	turquoise
ENSG00000155366	0.503828	0.926128	-0.290895	-0.894625	-0.587878	RHOC	turquoise
ENSG00000155368	0.183675	0.658347	-0.000122599	-0.564492	-0.535908	DBI	turquoise
ENSG00000155729	0.395907	0.588777	-0.298627	-0.667855	-0.323948	KCTD18	turquoise
ENSG00000155792	0.644361	0.752686	-0.467836	-0.7704	-0.293401	DEPTOR	turquoise
ENSG00000155957	-0.00555705	0.516664	0.190559	-0.463902	-0.557666	TMBIM4	turquoise
ENSG00000155961	0.387863	0.99152	-0.149602	-0.953341	-0.744238	RAB39B	turquoise
ENSG00000155980	0.62191	0.824595	-0.469771	-0.879322	-0.39857	KIF5A	turquoise
ENSG00000156011	0.484901	0.564625	-0.472392	-0.627827	-0.241906	PSD3	turquoise
ENSG00000156030	0.725411	0.628144	-0.600608	-0.736769	-0.119261	ELMSAN1	turquoise
ENSG00000156113	0.333781	0.383997	-0.15313	-0.338721	-0.138043	KCNMA1	turquoise
ENSG00000156345	0.411064	0.895509	-0.221397	-0.883229	-0.632777	CDK20	turquoise
ENSG00000156467	-0.424921	0.236438	0.526634	-0.173204	-0.560811	UQCRB	turquoise
ENSG00000156508	0.682089	0.929315	-0.501616	-0.976728	-0.462997	EEF1A1	turquoise
ENSG00000156875	0.476366	0.842398	-0.287007	-0.854836	-0.529384	HIAT1	turquoise
ENSG00000156976	0.21262	0.871287	-0.0348181	-0.867864	-0.754284	EIF4A2	turquoise
ENSG00000157020	0.554873	0.925298	-0.353855	-0.909982	-0.551982	SEC13	turquoise
ENSG00000157110	0.260291	0.591181	-0.110359	-0.586351	-0.409324	RBPMS	turquoise
ENSG00000157193	0.529052	0.46619	-0.439563	-0.454268	-0.0881443	LRP8	turquoise
ENSG00000157224	0.607784	0.866393	-0.413313	-0.869509	-0.447534	CLDN12	turquoise
ENSG00000157227	0.417686	0.879367	-0.192195	-0.849872	-0.607852	MMP14	turquoise
ENSG00000157259	0.648027	0.933167	-0.463471	-0.955018	-0.4918	GATAD1	turquoise
ENSG00000157326	-0.252825	0.385205	0.295661	-0.322018	-0.595894	DHRS4	turquoise
ENSG00000157514	0.411463	0.996988	-0.180881	-0.966136	-0.732374	TSC22D3	turquoise
ENSG00000157538	0.719505	0.691573	-0.56113	-0.7576	-0.199179	DSCR3	turquoise
ENSG00000157578	0.319584	0.787807	-0.105436	-0.755231	-0.583783	LCA5L	turquoise
ENSG00000157827	0.609281	0.779989	-0.485185	-0.78519	-0.358623	FMNL2	turquoise
ENSG00000157916	0.65748	0.544716	-0.550598	-0.564955	-0.0761776	RER1	turquoise
ENSG00000157954	0.538619	0.795409	-0.396755	-0.814706	-0.426907	WIPI2	turquoise
ENSG00000158062	-0.400518	0.417225	0.568885	-0.296539	-0.741841	UBXN11	turquoise
ENSG00000158079	0.57732	0.927167	-0.367522	-0.9524	-0.535973	PTPDC1	turquoise
ENSG00000158106	0.157495	0.804774	0.00500212	-0.775672	-0.728365	RHPN1	turquoise
ENSG00000158109	0.505286	0.97279	-0.277009	-0.951053	-0.634668	TPRG1L	turquoise
ENSG00000158158	0.598276	0.868011	-0.431738	-0.927133	-0.462669	CNNM4	turquoise
ENSG00000158186	0.428686	0.834482	-0.223616	-0.825214	-0.542806	MRAS	turquoise
ENSG00000158195	0.854109	0.802156	-0.704852	-0.897359	-0.198874	WASF2	turquoise
ENSG00000158201	0.569914	0.947542	-0.355311	-0.976732	-0.561755	ABHD3	turquoise
ENSG00000158292	0.484589	0.679468	-0.343515	-0.763457	-0.347119	GPR153	turquoise
ENSG00000158373	0.240248	0.905815	-0.0152978	-0.856033	-0.757125	HIST1H2BD	turquoise
ENSG00000158457	-0.176016	0.669962	0.376018	-0.548707	-0.831382	TSPAN33	turquoise
ENSG00000158467	0.538485	0.592713	-0.436766	-0.666256	-0.214289	AHCYL2	turquoise
ENSG00000158470	0.696928	0.902014	-0.501264	-0.930396	-0.423286	B4GALT5	turquoise
ENSG00000158604	0.560142	0.781021	-0.358609	-0.812009	-0.39717	TMED4	turquoise
ENSG00000158615	0.719904	0.789572	-0.549929	-0.844464	-0.284354	PPP1R15B	turquoise
ENSG00000158710	0.715588	0.90162	-0.507223	-0.948002	-0.40893	TAGLN2	turquoise
ENSG00000158792	0.353186	0.921373	-0.151259	-0.883051	-0.689605	SPATA2L	turquoise
ENSG00000158793	0.398265	0.831038	-0.258301	-0.838577	-0.5697	NIT1	turquoise
ENSG00000158796	0.37316	0.872949	-0.173523	-0.840669	-0.631446	DEDD	turquoise
ENSG00000158825	0.473061	0.973698	-0.253456	-0.970955	-0.664919	CDA	turquoise
ENSG00000158828	0.444179	0.98793	-0.220793	-0.983861	-0.699822	PINK1	turquoise
ENSG00000158985	0.599418	0.914163	-0.388678	-0.950456	-0.507507	CDC42SE2	turquoise
ENSG00000159023	0.61331	0.864866	-0.45741	-0.921487	-0.445288	EPB41	turquoise
ENSG00000159069	-0.0532064	0.462335	0.102425	-0.396651	-0.525456	FBXW5	turquoise
ENSG00000159164	0.280849	0.879566	-0.0437837	-0.812828	-0.699657	SV2A	turquoise
ENSG00000159176	0.539603	0.817484	-0.386715	-0.797781	-0.453627	CSRP1	turquoise
ENSG00000159214	0.05184	0.804535	0.158142	-0.742525	-0.811022	CCDC24	turquoise
ENSG00000159228	0.18283	0.885648	-0.0118381	-0.833075	-0.78543	CBR1	turquoise
ENSG00000159231	0.336487	0.947744	-0.149004	-0.925933	-0.739467	CBR3	turquoise
ENSG00000159423	0.271942	0.939765	-0.0619564	-0.879848	-0.775889	ALDH4A1	turquoise
ENSG00000159479	0.435428	0.974759	-0.192088	-0.943854	-0.686976	MED8	turquoise
ENSG00000159658	0.721294	0.514506	-0.625105	-0.594286	0.0104732	EFCAB14	turquoise
ENSG00000159713	0.450187	0.930017	-0.208411	-0.88811	-0.632048	TPPP3	turquoise
ENSG00000159714	0.00261699	0.841631	0.190376	-0.753111	-0.881467	ZDHHC1	turquoise
ENSG00000159840	0.197934	0.444203	-0.124187	-0.365792	-0.324333	ZYX	turquoise
ENSG00000159884	-0.400846	0.590474	0.612792	-0.427389	-0.905356	CCDC107	turquoise
ENSG00000159921	0.757066	0.872084	-0.570802	-0.912789	-0.345319	GNE	turquoise
ENSG00000160007	0.598237	0.659204	-0.454478	-0.753768	-0.25218	ARHGAP35	turquoise
ENSG00000160055	-0.137509	0.706755	0.337897	-0.600156	-0.84228	TMEM234	turquoise
ENSG00000160058	0.542854	0.883336	-0.379729	-0.902974	-0.525748	BSDC1	turquoise
ENSG00000160062	0.595286	0.724775	-0.45056	-0.794364	-0.317508	ZBTB8A	turquoise
ENSG00000160075	-0.0847935	0.681048	0.292089	-0.541853	-0.758779	SSU72	turquoise
ENSG00000160211	0.44757	0.975554	-0.222339	-0.949099	-0.685367	G6PD	turquoise
ENSG00000160213	0.404391	0.977872	-0.181525	-0.93718	-0.715047	CSTB	turquoise
ENSG00000160271	0.623056	0.853158	-0.450638	-0.891771	-0.426087	RALGDS	turquoise
ENSG00000160285	0.574685	0.949711	-0.369291	-0.945901	-0.56249	LSS	turquoise
ENSG00000160310	0.376262	0.898038	-0.206801	-0.897385	-0.650648	PRMT2	turquoise
ENSG00000160360	0.171988	0.833599	-0.0264281	-0.78735	-0.749283	GPSM1	turquoise
ENSG00000160404	0.0789855	0.82971	0.1347	-0.761671	-0.803469	TOR2A	turquoise
ENSG00000160408	0.507658	0.858765	-0.370046	-0.905972	-0.521103	ST6GALNAC6	turquoise
ENSG00000160469	0.483016	0.838109	-0.296126	-0.821092	-0.510455	BRSK1	turquoise
ENSG00000160570	0.441953	0.84519	-0.267451	-0.860866	-0.554471	DEDD2	turquoise
ENSG00000160602	0.605706	0.779367	-0.429496	-0.836109	-0.363459	NEK8	turquoise
ENSG00000160712	0.516053	0.877096	-0.32302	-0.915675	-0.533258	IL6R	turquoise
ENSG00000160752	0.291744	0.945972	-0.073254	-0.875688	-0.76841	FDPS	turquoise
ENSG00000160783	-0.408552	0.355683	0.561111	-0.226334	-0.665544	PMF1	turquoise
ENSG00000160789	0.580232	0.711605	-0.402011	-0.752648	-0.324906	LMNA	turquoise
ENSG00000160888	-0.117847	0.576827	0.25339	-0.433627	-0.692913	IER2	turquoise
ENSG00000160948	0.14867	0.893487	0.100372	-0.819905	-0.818009	VPS28	turquoise
ENSG00000160951	0.219552	0.944121	0.0273538	-0.864986	-0.813568	PTGER1	turquoise
ENSG00000160961	0.189572	0.3675	-0.119561	-0.351622	-0.244084	ZNF333	turquoise
ENSG00000161011	0.624571	0.950969	-0.416995	-0.98447	-0.528091	SQSTM1	turquoise
ENSG00000161013	0.618981	0.910829	-0.416772	-0.953785	-0.486959	MGAT4B	turquoise
ENSG00000161243	0.720239	0.572122	-0.585464	-0.597828	-0.0556786	FBXO27	turquoise
ENSG00000161277	0.603079	0.67858	-0.471561	-0.740077	-0.252816	THAP8	turquoise
ENSG00000161395	0.0973312	0.860273	0.107436	-0.778161	-0.827487	PGAP3	turquoise
ENSG00000161642	0.652614	0.799361	-0.480642	-0.861631	-0.343077	ZNF385A	turquoise
ENSG00000161677	-0.0501479	0.7837	0.212028	-0.713709	-0.855126	JOSD2	turquoise
ENSG00000161714	0.285439	0.853835	-0.102039	-0.84442	-0.686341	PLCD3	turquoise
ENSG00000161970	0.0798001	0.782783	0.0648666	-0.70446	-0.748288	RPL26	turquoise
ENSG00000162032	0.329836	0.950714	-0.128708	-0.912276	-0.744484	SPSB3	turquoise
ENSG00000162066	0.0219934	0.801233	0.160891	-0.72841	-0.825261	AMDHD2	turquoise
ENSG00000162191	0.261417	0.83072	-0.0611244	-0.833099	-0.675021	UBXN1	turquoise
ENSG00000162194	0.230443	0.897687	-0.0239957	-0.843284	-0.763851	LBHD1	turquoise
ENSG00000162227	-0.170855	0.170708	0.175388	-0.144547	-0.306715	TAF6L	turquoise
ENSG00000162236	0.615974	0.938274	-0.413122	-0.951002	-0.515663	STX5	turquoise
ENSG00000162244	-0.208481	0.763495	0.399314	-0.650533	-0.951273	RPL29	turquoise
ENSG00000162298	0.879331	0.727014	-0.753379	-0.814305	-0.102715	SYVN1	turquoise
ENSG00000162300	0.379322	0.789195	-0.181911	-0.774458	-0.539483	ZFPL1	turquoise
ENSG00000162368	0.794521	0.704877	-0.720437	-0.799323	-0.14669	CMPK1	turquoise
ENSG00000162413	0.598441	0.842248	-0.429347	-0.848455	-0.430098	KLHL21	turquoise
ENSG00000162426	0.336806	0.925519	-0.113655	-0.865976	-0.706569	SLC45A1	turquoise
ENSG00000162512	0.754331	0.806418	-0.585189	-0.864343	-0.276555	SDC3	turquoise
ENSG00000162522	0.64664	0.917895	-0.451182	-0.962991	-0.477422	KIAA1522	turquoise
ENSG00000162545	0.204309	0.369748	-0.0935414	-0.316242	-0.205645	CAMK2N1	turquoise
ENSG00000162572	0.294697	0.689146	-0.17349	-0.663143	-0.502298	SCNN1D	turquoise
ENSG00000162576	0.476328	0.955784	-0.26769	-0.967464	-0.643861	MXRA8	turquoise
ENSG00000162591	0.384792	0.944072	-0.177224	-0.931525	-0.705219	MEGF6	turquoise
ENSG00000162604	0.626749	0.782549	-0.469981	-0.806677	-0.335294	TM2D1	turquoise
ENSG00000162645	0.217728	0.758231	-0.0140018	-0.737294	-0.62182	GBP2	turquoise
ENSG00000162694	-0.0902034	0.209775	0.101668	-0.100849	-0.287866	EXTL2	turquoise
ENSG00000162704	0.31667	0.583764	-0.18021	-0.513087	-0.373027	ARPC5	turquoise
ENSG00000162714	0.527349	0.562777	-0.413324	-0.663256	-0.200922	ZNF496	turquoise
ENSG00000162729	-0.068589	0.798723	0.290848	-0.664557	-0.879276	IGSF8	turquoise
ENSG00000162734	0.771043	0.842856	-0.610037	-0.906644	-0.30408	PEA15	turquoise
ENSG00000162755	0.227877	0.771609	-0.0404436	-0.74816	-0.630501	KLHDC9	turquoise
ENSG00000162772	0.485185	0.983642	-0.270896	-0.974462	-0.664553	ATF3	turquoise
ENSG00000162782	0.189753	0.8002	0.00738446	-0.787888	-0.698183	TDRD5	turquoise
ENSG00000162817	0.337427	0.869509	-0.151501	-0.860478	-0.647893	C1orf115	turquoise
ENSG00000162852	0.276501	0.468061	-0.186643	-0.40281	-0.27966	CNST	turquoise
ENSG00000162909	0.516073	0.914742	-0.31846	-0.889405	-0.57281	CAPN2	turquoise
ENSG00000162929	0.704549	0.645253	-0.57938	-0.722925	-0.146015	KIAA1841	turquoise
ENSG00000162976	0.466649	0.929941	-0.231382	-0.909543	-0.620081	PQLC3	turquoise
ENSG00000163001	0.275429	0.902367	-0.10491	-0.880247	-0.732639	CFAP36	turquoise
ENSG00000163083	0.666396	0.713995	-0.52045	-0.792846	-0.256862	INHBB	turquoise
ENSG00000163126	-0.0579327	0.687754	0.248148	-0.601343	-0.75121	ANKRD23	turquoise
ENSG00000163191	0.414307	0.686828	-0.252758	-0.61829	-0.400783	S100A11	turquoise
ENSG00000163251	-0.00774221	0.0706862	0.0767498	-0.114965	-0.0771378	FZD5	turquoise
ENSG00000163346	0.500486	0.973279	-0.298176	-0.982157	-0.641362	PBXIP1	turquoise
ENSG00000163348	-0.0590582	0.566489	0.197054	-0.514547	-0.647105	PYGO2	turquoise
ENSG00000163382	-0.305431	0.486282	0.477018	-0.403539	-0.726527	APOA1BP	turquoise
ENSG00000163435	0.533228	0.970023	-0.311981	-0.98908	-0.613945	ELF3	turquoise
ENSG00000163463	-0.230421	0.470849	0.404712	-0.369496	-0.647294	KRTCAP2	turquoise
ENSG00000163516	0.239643	0.736663	-0.146207	-0.764305	-0.597695	ANKZF1	turquoise
ENSG00000163536	-0.0105379	0.653378	0.19317	-0.594679	-0.692869	SERPINI1	turquoise
ENSG00000163659	0.549909	0.957003	-0.335427	-0.953125	-0.589965	TIPARP	turquoise
ENSG00000163683	0.608821	0.934853	-0.400194	-0.947815	-0.518028	SMIM14	turquoise
ENSG00000163702	0.254766	0.922374	-0.0456089	-0.867852	-0.775075	IL17RC	turquoise
ENSG00000163703	0.164508	0.889828	0.0459932	-0.823825	-0.811009	CRELD1	turquoise
ENSG00000163719	0.639555	0.738147	-0.478221	-0.774935	-0.292665	MTMR14	turquoise
ENSG00000163728	0.347086	0.906356	-0.144223	-0.886502	-0.68877	TTC14	turquoise
ENSG00000163794	0.116916	0.723125	0.0541136	-0.69668	-0.657147	UCN	turquoise
ENSG00000163795	0.277621	0.685366	-0.0972806	-0.689092	-0.504275	ZNF513	turquoise
ENSG00000163820	0.547711	0.810813	-0.368376	-0.83236	-0.432742	FYCO1	turquoise
ENSG00000163870	0.455156	0.864652	-0.26453	-0.849095	-0.560834	TPRA1	turquoise
ENSG00000163875	0.531758	0.882952	-0.342721	-0.88606	-0.513065	MEAF6	turquoise
ENSG00000163888	0.220373	0.899573	0.0127551	-0.818521	-0.770773	CAMK2N2	turquoise
ENSG00000163898	0.432627	0.635157	-0.320945	-0.606709	-0.346362	LIPH	turquoise
ENSG00000163931	0.588284	0.933012	-0.404284	-0.981161	-0.542029	TKT	turquoise
ENSG00000163947	0.696321	0.861509	-0.477984	-0.902055	-0.376322	ARHGEF3	turquoise
ENSG00000163993	0.330138	0.976554	-0.100106	-0.930044	-0.771059	S100P	turquoise
ENSG00000164008	-0.363226	0.537761	0.546137	-0.418428	-0.826537	C1orf50	turquoise
ENSG00000164010	0.623995	0.912037	-0.424931	-0.963749	-0.488359	ERMAP	turquoise
ENSG00000164023	0.721636	0.660568	-0.593143	-0.720314	-0.162152	SGMS2	turquoise
ENSG00000164054	0.373894	0.945786	-0.139019	-0.896054	-0.69834	SHISA5	turquoise
ENSG00000164074	0.597569	0.66743	-0.489947	-0.752137	-0.261133	C4orf29	turquoise
ENSG00000164078	0.315436	0.862579	-0.12624	-0.809935	-0.660928	MST1R	turquoise
ENSG00000164088	0.213627	0.882908	-0.00615988	-0.821208	-0.760929	PPM1M	turquoise
ENSG00000164117	0.310331	0.908334	-0.106156	-0.867096	-0.718933	FBXO8	turquoise
ENSG00000164181	0.600718	0.703755	-0.447366	-0.728816	-0.280837	ELOVL7	turquoise
ENSG00000164211	0.514131	0.922677	-0.290922	-0.894466	-0.572458	STARD4	turquoise
ENSG00000164220	0.640657	0.87795	-0.465597	-0.88941	-0.43841	F2RL2	turquoise
ENSG00000164244	0.733377	0.739155	-0.605168	-0.810991	-0.236592	PRRC1	turquoise
ENSG00000164258	-0.227934	0.623587	0.359137	-0.535437	-0.822144	NDUFS4	turquoise
ENSG00000164296	-0.186627	0.427827	0.319893	-0.383908	-0.597134	TIGD6	turquoise
ENSG00000164305	-0.0860005	0.606995	0.269268	-0.475407	-0.700832	CASP3	turquoise
ENSG00000164331	0.543644	0.714395	-0.385067	-0.777636	-0.328559	ANKRA2	turquoise
ENSG00000164379	-0.398606	0.171165	0.516817	0.024387	-0.470981	FOXQ1	turquoise
ENSG00000164463	0.743718	0.818193	-0.592329	-0.890146	-0.295539	CREBRF	turquoise
ENSG00000164587	-0.413938	0.444829	0.479624	-0.320973	-0.769056	RPS14	turquoise
ENSG00000164597	0.684687	0.673766	-0.594927	-0.759644	-0.200381	COG5	turquoise
ENSG00000164615	0.345631	0.942279	-0.163438	-0.922604	-0.725244	CAMLG	turquoise
ENSG00000164638	0.45138	0.29134	-0.383452	-0.401179	0.0412752	SLC29A4	turquoise
ENSG00000164690	0.430961	0.950638	-0.198762	-0.957686	-0.673901	SHH	turquoise
ENSG00000164695	0.391419	0.929649	-0.1499	-0.877446	-0.671363	CHMP4C	turquoise
ENSG00000164713	0.253062	0.947686	-0.0100316	-0.885354	-0.794406	BRI3	turquoise
ENSG00000164850	0.451896	0.686317	-0.290463	-0.726751	-0.368906	GPER1	turquoise
ENSG00000164855	0.522865	0.887291	-0.341794	-0.903288	-0.540677	TMEM184A	turquoise
ENSG00000164877	0.165058	0.907332	0.0749045	-0.841045	-0.824628	MICALL2	turquoise
ENSG00000164896	0.0511876	0.766983	0.11303	-0.675135	-0.763286	FASTK	turquoise
ENSG00000164897	-0.10781	0.691218	0.307999	-0.598404	-0.804066	TMUB1	turquoise
ENSG00000164938	0.579281	0.937276	-0.379042	-0.954865	-0.5446	TP53INP1	turquoise
ENSG00000164944	0.296498	0.840206	-0.0997283	-0.812451	-0.648332	KIAA1429	turquoise
ENSG00000164949	0.22068	0.789366	-0.0265931	-0.749517	-0.673848	GEM	turquoise
ENSG00000164970	0.610402	0.853777	-0.430945	-0.876487	-0.432116	FAM219A	turquoise
ENSG00000164983	0.575058	0.900031	-0.352484	-0.908386	-0.502249	TMEM65	turquoise
ENSG00000165030	0.366434	0.956434	-0.132809	-0.928012	-0.718071	NFIL3	turquoise
ENSG00000165169	0.311604	0.885106	-0.0765917	-0.810258	-0.682236	DYNLT3	turquoise
ENSG00000165171	-0.00766786	0.792732	0.167801	-0.712739	-0.836479	WBSCR27	turquoise
ENSG00000165175	0.387219	0.973543	-0.136385	-0.951966	-0.723407	MID1IP1	turquoise
ENSG00000165215	0.423379	0.96955	-0.181383	-0.946056	-0.690097	CLDN3	turquoise
ENSG00000165233	0.133508	0.854256	0.0597178	-0.775492	-0.791195	C9orf89	turquoise
ENSG00000165272	0.676352	0.637342	-0.512384	-0.747016	-0.15723	AQP3	turquoise
ENSG00000165312	0.15537	0.858837	0.0812124	-0.808899	-0.780345	OTUD1	turquoise
ENSG00000165322	0.0604295	0.69612	0.0501251	-0.606217	-0.681767	ARHGAP12	turquoise
ENSG00000165434	0.778846	0.816462	-0.581682	-0.873675	-0.268032	PGM2L1	turquoise
ENSG00000165475	0.0297948	0.846058	0.14982	-0.778877	-0.863794	CRYL1	turquoise
ENSG00000165476	0.76894	0.74414	-0.614505	-0.78687	-0.20384	REEP3	turquoise
ENSG00000165507	0.520621	0.928489	-0.345186	-0.95396	-0.578048	C10orf10	turquoise
ENSG00000165516	0.592744	0.868197	-0.392201	-0.90082	-0.460303	KLHDC2	turquoise
ENSG00000165644	-0.35947	0.47567	0.537167	-0.361213	-0.747932	COMTD1	turquoise
ENSG00000165678	0.576934	0.923396	-0.3857	-0.948131	-0.531146	GHITM	turquoise
ENSG00000165698	0.445728	0.895286	-0.263049	-0.90058	-0.601543	C9orf9	turquoise
ENSG00000165716	0.208213	0.660968	-0.100829	-0.707288	-0.538733	FAM69B	turquoise
ENSG00000165752	-0.224622	0.721892	0.394967	-0.618865	-0.914776	STK32C	turquoise
ENSG00000165782	0.121525	0.862778	0.133507	-0.779792	-0.805744	TMEM55B	turquoise
ENSG00000165813	0.649312	0.720516	-0.494797	-0.770971	-0.27754	CCDC186	turquoise
ENSG00000165914	0.549286	0.839427	-0.380249	-0.86065	-0.470866	TTC7B	turquoise
ENSG00000165915	0.38265	0.937628	-0.180995	-0.905983	-0.696226	SLC39A13	turquoise
ENSG00000166012	0.328982	0.808792	-0.150855	-0.795997	-0.604639	TAF1D	turquoise
ENSG00000166123	0.555631	0.759385	-0.4679	-0.821921	-0.38078	GPT2	turquoise
ENSG00000166128	0.483294	0.59388	-0.340633	-0.657905	-0.255449	RAB8B	turquoise
ENSG00000166173	0.388205	0.966044	-0.164646	-0.947098	-0.720469	LARP6	turquoise
ENSG00000166199	0.377198	0.862459	-0.208459	-0.835487	-0.618271	ALKBH3	turquoise
ENSG00000166224	0.601933	0.779465	-0.405454	-0.814719	-0.374737	SGPL1	turquoise
ENSG00000166262	0.0776245	0.766925	0.13453	-0.734657	-0.73832	FAM227B	turquoise
ENSG00000166295	0.244875	0.727756	-0.0701987	-0.726673	-0.573133	ANAPC16	turquoise
ENSG00000166311	-0.133805	0.614533	0.363265	-0.481835	-0.734225	SMPD1	turquoise
ENSG00000166377	0.510135	0.801516	-0.315634	-0.821589	-0.463309	ATP9B	turquoise
ENSG00000166432	0.589295	0.840604	-0.386157	-0.872942	-0.434678	ZMAT1	turquoise
ENSG00000166441	0.377966	0.906522	-0.150617	-0.85488	-0.654853	RPL27A	turquoise
ENSG00000166471	0.590428	0.933835	-0.379302	-0.926107	-0.532227	TMEM41B	turquoise
ENSG00000166483	0.487778	0.953979	-0.282412	-0.935261	-0.630756	WEE1	turquoise
ENSG00000166526	-0.0311488	0.6117	0.16259	-0.571027	-0.659318	ZNF3	turquoise
ENSG00000166557	0.324091	0.939577	-0.0653146	-0.876614	-0.734587	TMED3	turquoise
ENSG00000166562	-0.0206569	0.849548	0.253505	-0.741005	-0.896566	SEC11C	turquoise
ENSG00000166619	0.48928	0.94254	-0.261654	-0.914122	-0.613898	BLCAP	turquoise
ENSG00000166681	-0.394265	0.452397	0.478246	-0.337849	-0.771551	NGFRAP1	turquoise
ENSG00000166734	0.645046	0.81109	-0.478784	-0.848332	-0.367469	CASC4	turquoise
ENSG00000166750	0.530037	0.871979	-0.319254	-0.868877	-0.508585	SLFN5	turquoise
ENSG00000166816	0.348445	0.932488	-0.140973	-0.924468	-0.717207	LDHD	turquoise
ENSG00000166821	0.202516	0.898726	0.00958479	-0.86733	-0.784938	PEX11A	turquoise
ENSG00000166848	0.00562868	0.851169	0.204324	-0.752698	-0.878372	TERF2IP	turquoise
ENSG00000166887	0.549636	0.831544	-0.38455	-0.863784	-0.463584	VPS39	turquoise
ENSG00000166900	0.701106	0.885717	-0.527814	-0.931838	-0.398883	STX3	turquoise
ENSG00000166924	-0.0943399	0.680982	0.32557	-0.597847	-0.787628	NYAP1	turquoise
ENSG00000166946	0.30385	0.97289	-0.0637041	-0.928126	-0.78613	CCNDBP1	turquoise
ENSG00000166971	0.260305	0.910522	-0.0744178	-0.868824	-0.764416	AKTIP	turquoise
ENSG00000166986	0.458477	0.720483	-0.255659	-0.740805	-0.410331	MARS	turquoise
ENSG00000166987	0.237065	0.773766	-0.0619337	-0.75983	-0.63174	MBD6	turquoise
ENSG00000167065	0.722703	0.780504	-0.510766	-0.82031	-0.270419	DUSP18	turquoise
ENSG00000167103	0.293523	0.942274	-0.0632452	-0.896481	-0.764915	PIP5KL1	turquoise
ENSG00000167110	0.520268	0.828503	-0.342769	-0.831297	-0.488856	GOLGA2	turquoise
ENSG00000167113	-0.0220941	0.736432	0.193884	-0.661266	-0.779916	COQ4	turquoise
ENSG00000167114	0.0195272	0.813364	0.207864	-0.684289	-0.835371	SLC27A4	turquoise
ENSG00000167118	-0.209141	0.510499	0.313159	-0.419519	-0.690175	URM1	turquoise
ENSG00000167157	-0.162412	0.585063	0.339953	-0.526466	-0.726593	PRRX2	turquoise
ENSG00000167280	0.0683036	0.622208	0.0128673	-0.599252	-0.612934	ENGASE	turquoise
ENSG00000167302	0.201657	0.536461	-0.0714218	-0.537578	-0.401702	ENTHD2	turquoise
ENSG00000167315	0.152077	0.496459	-0.0576183	-0.529222	-0.397041	ACAA2	turquoise
ENSG00000167378	0.267545	0.790687	-0.030324	-0.763334	-0.626887	IRGQ	turquoise
ENSG00000167460	0.465916	0.34187	-0.453991	-0.337113	-0.0175698	TPM4	turquoise
ENSG00000167508	0.283352	0.923031	-0.0797747	-0.875995	-0.754698	MVD	turquoise
ENSG00000167525	0.359219	0.78568	-0.213081	-0.809618	-0.562858	PROCA1	turquoise
ENSG00000167526	-0.260373	0.642025	0.386839	-0.561635	-0.863822	RPL13	turquoise
ENSG00000167535	0.3027	0.79207	-0.101465	-0.789882	-0.596157	CACNB3	turquoise
ENSG00000167543	0.16823	0.808887	0.0661398	-0.75465	-0.716527	TP53I13	turquoise
ENSG00000167549	0.523596	0.879265	-0.338479	-0.90487	-0.529691	CORO6	turquoise
ENSG00000167552	0.487481	0.955806	-0.268815	-0.931414	-0.629152	TUBA1A	turquoise
ENSG00000167566	0.553811	0.883703	-0.350075	-0.868137	-0.50285	NCKAP5L	turquoise
ENSG00000167578	-0.0312786	0.79388	0.268356	-0.691664	-0.843262	RAB4B	turquoise
ENSG00000167641	-0.132134	0.698727	0.39158	-0.593114	-0.824132	PPP1R14A	turquoise
ENSG00000167642	0.562211	0.902436	-0.330379	-0.914513	-0.525029	SPINT2	turquoise
ENSG00000167644	-0.0929438	0.794734	0.297414	-0.673476	-0.900289	C19orf33	turquoise
ENSG00000167657	0.13915	0.723411	0.0395268	-0.624884	-0.648622	DAPK3	turquoise
ENSG00000167658	0.361187	0.464236	-0.332867	-0.573918	-0.217349	EEF2	turquoise
ENSG00000167702	0.368654	0.936696	-0.177559	-0.928338	-0.703263	KIFC2	turquoise
ENSG00000167720	0.469877	0.831753	-0.280336	-0.823611	-0.51645	SRR	turquoise
ENSG00000167733	0.481559	0.679777	-0.387041	-0.74095	-0.342973	HSD11B1L	turquoise
ENSG00000167740	0.608444	0.845945	-0.371916	-0.872288	-0.425212	CYB5D2	turquoise
ENSG00000167766	0.592655	0.83781	-0.448758	-0.881823	-0.437715	ZNF83	turquoise
ENSG00000167778	0.0901262	0.764226	0.11745	-0.676781	-0.719441	SPRYD3	turquoise
ENSG00000167797	0.166636	0.919314	0.0704013	-0.825156	-0.832694	CDK2AP2	turquoise
ENSG00000167799	-0.0569189	0.723143	0.240574	-0.582949	-0.79411	NUDT8	turquoise
ENSG00000167920	-0.1698	0.464408	0.372543	-0.391622	-0.596989	TMEM99	turquoise
ENSG00000167962	-0.016692	0.682274	0.225301	-0.596949	-0.715134	ZNF598	turquoise
ENSG00000167968	0.0430001	0.821288	0.192317	-0.749299	-0.825211	DNASE1L2	turquoise
ENSG00000167969	-0.253682	0.618114	0.461496	-0.51826	-0.833139	ECI1	turquoise
ENSG00000167972	0.599682	0.873904	-0.393896	-0.874474	-0.467959	ABCA3	turquoise
ENSG00000167978	0.00242194	0.791368	0.176133	-0.741044	-0.822209	SRRM2	turquoise
ENSG00000167996	0.126637	0.943209	0.0860966	-0.874342	-0.889924	FTH1	turquoise
ENSG00000168003	0.528779	0.949656	-0.326068	-0.958452	-0.594681	SLC3A2	turquoise
ENSG00000168010	0.0508189	0.695918	0.112154	-0.606876	-0.694101	ATG16L2	turquoise
ENSG00000168056	0.281199	0.893699	-0.0800626	-0.863818	-0.730509	LTBP3	turquoise
ENSG00000168071	0.155122	0.880705	0.0894768	-0.80179	-0.789125	CCDC88B	turquoise
ENSG00000168096	0.236384	0.824497	-0.0434274	-0.800888	-0.687085	ANKS3	turquoise
ENSG00000168118	0.550478	0.810091	-0.378086	-0.854463	-0.432062	RAB4A	turquoise
ENSG00000168159	0.393598	0.993914	-0.172489	-0.966752	-0.741822	RNF187	turquoise
ENSG00000168209	0.39199	0.802814	-0.222224	-0.816899	-0.534426	DDIT4	turquoise
ENSG00000168216	0.404731	0.972763	-0.183155	-0.950987	-0.710299	LMBRD1	turquoise
ENSG00000168300	0.74262	0.815852	-0.585359	-0.871369	-0.298861	PCMTD1	turquoise
ENSG00000168374	0.641336	0.915136	-0.453484	-0.925849	-0.477863	ARF4	turquoise
ENSG00000168389	0.349195	0.699422	-0.185035	-0.647792	-0.465792	MFSD2A	turquoise
ENSG00000168495	0.622238	0.574134	-0.573963	-0.678915	-0.134777	POLR3D	turquoise
ENSG00000168528	0.438942	0.977968	-0.194969	-0.946212	-0.687231	SERINC2	turquoise
ENSG00000168591	0.322119	0.89427	-0.111988	-0.881664	-0.690857	TMUB2	turquoise
ENSG00000168672	0.410286	0.864644	-0.174063	-0.845775	-0.595709	FAM84B	turquoise
ENSG00000168701	-0.3598	0.535164	0.528355	-0.367279	-0.821888	TMEM208	turquoise
ENSG00000168724	0.314869	0.902658	-0.123782	-0.871439	-0.710094	DNAJC21	turquoise
ENSG00000168785	0.317726	0.412971	-0.208149	-0.345465	-0.190206	TSPAN5	turquoise
ENSG00000168876	-0.0294342	0.719669	0.174349	-0.670657	-0.779802	ANKRD49	turquoise
ENSG00000168890	0.269148	0.945595	-0.0420802	-0.897002	-0.784343	TMEM150A	turquoise
ENSG00000168904	0.457388	0.874505	-0.282823	-0.860551	-0.57116	LRRC28	turquoise
ENSG00000168917	0.0825242	0.634756	0.109137	-0.517004	-0.601169	SLC35G2	turquoise
ENSG00000168936	0.24312	0.9477	-0.0197881	-0.906916	-0.809541	TMEM129	turquoise
ENSG00000168938	0.289081	0.949755	-0.0408482	-0.904919	-0.7712	PPIC	turquoise
ENSG00000168944	0.60668	0.708195	-0.41288	-0.774476	-0.285761	CEP120	turquoise
ENSG00000168958	0.0514504	0.827619	0.132569	-0.75981	-0.828306	MFF	turquoise
ENSG00000168993	0.401234	0.922142	-0.163439	-0.903404	-0.661423	CPLX1	turquoise
ENSG00000168994	0.450887	0.970914	-0.231947	-0.942214	-0.674875	PXDC1	turquoise
ENSG00000169105	-0.222834	0.338229	0.357026	-0.175889	-0.511412	CHST14	turquoise
ENSG00000169116	-0.0132256	0.226034	0.0797495	-0.110585	-0.251139	PARM1	turquoise
ENSG00000169131	0.317253	0.678734	-0.171355	-0.718579	-0.466809	ZNF354A	turquoise
ENSG00000169193	0.228615	0.84681	-0.0368763	-0.789313	-0.71647	CCDC126	turquoise
ENSG00000169228	0.0453409	0.804742	0.10899	-0.758742	-0.807573	RAB24	turquoise
ENSG00000169231	0.440426	0.90693	-0.286733	-0.922865	-0.623384	THBS3	turquoise
ENSG00000169241	0.154735	0.790016	0.00409015	-0.756358	-0.702622	SLC50A1	turquoise
ENSG00000169249	0.101141	0.697742	0.0450875	-0.66435	-0.650567	ZRSR2	turquoise
ENSG00000169251	0.590501	0.536487	-0.500098	-0.564025	-0.12616	NMD3	turquoise
ENSG00000169255	0.149678	0.818545	0.0916935	-0.732961	-0.746075	B3GALNT1	turquoise
ENSG00000169359	0.443239	0.828901	-0.237118	-0.804583	-0.53608	SLC33A1	turquoise
ENSG00000169446	0.636863	0.870749	-0.452552	-0.879403	-0.432383	MMGT1	turquoise
ENSG00000169504	0.745253	0.801156	-0.578068	-0.845776	-0.280666	CLIC4	turquoise
ENSG00000169567	-0.353158	0.485562	0.458238	-0.381947	-0.764113	HINT1	turquoise
ENSG00000169583	0.384364	0.959356	-0.152816	-0.929694	-0.710909	CLIC3	turquoise
ENSG00000169621	0.360245	0.471694	-0.183749	-0.467741	-0.206841	APLF	turquoise
ENSG00000169660	-0.181597	0.675397	0.360153	-0.595706	-0.845441	HEXDC	turquoise
ENSG00000169682	-0.375282	0.478085	0.534573	-0.348279	-0.771269	SPNS1	turquoise
ENSG00000169692	0.490517	0.951309	-0.289735	-0.97784	-0.625814	AGPAT2	turquoise
ENSG00000169710	0.203803	0.949439	0.0289341	-0.867615	-0.837032	FASN	turquoise
ENSG00000169714	0.335995	0.915406	-0.12285	-0.906838	-0.700572	CNBP	turquoise
ENSG00000169740	-0.0885513	0.712412	0.288047	-0.606314	-0.794839	ZNF32	turquoise
ENSG00000169826	0.398241	0.958162	-0.182384	-0.923768	-0.704637	CSGALNACT2	turquoise
ENSG00000169894	0.655293	0.819903	-0.470897	-0.82332	-0.361712	MUC3A	turquoise
ENSG00000169957	-0.247964	0.618154	0.437272	-0.527658	-0.830102	ZNF768	turquoise
ENSG00000170085	-0.474986	0.326755	0.602733	-0.213328	-0.685238	SIMC1	turquoise
ENSG00000170190	0.519519	0.739119	-0.410624	-0.808938	-0.397371	SLC16A5	turquoise
ENSG00000170310	0.0984275	0.813021	0.129143	-0.729827	-0.763538	STX8	turquoise
ENSG00000170340	-0.275698	0.316907	0.415331	-0.144954	-0.528712	B3GNT2	turquoise
ENSG00000170412	0.133922	0.468315	0.0173592	-0.485495	-0.376494	GPRC5C	turquoise
ENSG00000170430	-0.303589	0.641942	0.49114	-0.529597	-0.890414	MGMT	turquoise
ENSG00000170473	-0.215917	0.706075	0.413231	-0.56694	-0.897093	WIBG	turquoise
ENSG00000170537	0.54106	0.781149	-0.355124	-0.759328	-0.412102	TMC7	turquoise
ENSG00000170545	0.175396	0.881633	0.0317037	-0.819737	-0.788323	SMAGP	turquoise
ENSG00000170638	-0.503822	0.165825	0.569415	-0.0682499	-0.547692	TRABD	turquoise
ENSG00000170647	0.160173	0.898495	0.0628884	-0.834828	-0.825039	TMEM133	turquoise
ENSG00000170689	0.677917	0.924638	-0.491257	-0.969396	-0.456478	HOXB9	turquoise
ENSG00000170743	0.112415	0.47836	0.0384989	-0.392835	-0.42433	SYT9	turquoise
ENSG00000170776	0.32248	0.577449	-0.147681	-0.592677	-0.356845	AKAP13	turquoise
ENSG00000170786	0.5162	0.967647	-0.296162	-0.974379	-0.622698	SDR16C5	turquoise
ENSG00000170876	0.71909	0.918286	-0.534114	-0.970274	-0.423735	TMEM43	turquoise
ENSG00000170881	0.707769	0.61558	-0.583898	-0.696914	-0.110753	RNF139	turquoise
ENSG00000170909	0.478862	0.784291	-0.272047	-0.757386	-0.453701	OSCAR	turquoise
ENSG00000170955	-0.105549	0.827274	0.336699	-0.691093	-0.936161	PRKCDBP	turquoise
ENSG00000171105	0.594044	0.578627	-0.499074	-0.616969	-0.159223	INSR	turquoise
ENSG00000171130	-0.148007	0.742397	0.376682	-0.607821	-0.881946	ATP6V0E2	turquoise
ENSG00000171148	-0.252254	0.670304	0.458978	-0.496037	-0.880597	TADA3	turquoise
ENSG00000171159	-0.0753809	0.812804	0.278654	-0.700697	-0.905305	C9orf16	turquoise
ENSG00000171160	0.132722	0.855753	0.0909512	-0.792133	-0.78164	MORN4	turquoise
ENSG00000171206	0.415211	0.84289	-0.254436	-0.817386	-0.55851	TRIM8	turquoise
ENSG00000171224	-0.0964987	0.714	0.297525	-0.585009	-0.810957	C10orf35	turquoise
ENSG00000171298	0.365951	0.905766	-0.218034	-0.900605	-0.674382	GAA	turquoise
ENSG00000171345	-0.168365	0.585498	0.395398	-0.441508	-0.725624	KRT19	turquoise
ENSG00000171368	0.67514	0.911134	-0.479452	-0.9725	-0.447085	TPPP	turquoise
ENSG00000171425	0.0337095	0.791026	0.1319	-0.750948	-0.802046	ZNF581	turquoise
ENSG00000171443	0.0132864	0.743302	0.192752	-0.700028	-0.763849	ZNF524	turquoise
ENSG00000171462	0.344809	0.864658	-0.137385	-0.842982	-0.634539	DLK2	turquoise
ENSG00000171552	0.371474	0.659739	-0.229984	-0.59519	-0.416674	BCL2L1	turquoise
ENSG00000171603	0.603191	0.774581	-0.405229	-0.809827	-0.352387	CLSTN1	turquoise
ENSG00000171612	-0.37172	0.538678	0.544057	-0.442019	-0.838341	SLC25A33	turquoise
ENSG00000171621	0.734754	0.779212	-0.570739	-0.883559	-0.269383	SPSB1	turquoise
ENSG00000171680	0.144867	0.74905	0.0263472	-0.652301	-0.679375	PLEKHG5	turquoise
ENSG00000171703	0.299264	0.916659	-0.109068	-0.886411	-0.730435	TCEA2	turquoise
ENSG00000171747	0.33127	0.801576	-0.166931	-0.790127	-0.602826	LGALS4	turquoise
ENSG00000171806	-0.440538	0.524322	0.614552	-0.379047	-0.873263	METTL18	turquoise
ENSG00000171813	0.020722	0.768473	0.179859	-0.734166	-0.783672	PWWP2B	turquoise
ENSG00000171867	0.374598	0.812491	-0.280763	-0.803794	-0.576426	PRNP	turquoise
ENSG00000171928	0.414576	0.849455	-0.201755	-0.820432	-0.567959	TVP23B	turquoise
ENSG00000171988	0.403885	0.971612	-0.184114	-0.935907	-0.709438	JMJD1C	turquoise
ENSG00000172006	0.586935	0.890643	-0.42685	-0.929903	-0.492621	ZNF554	turquoise
ENSG00000172007	0.713471	0.839449	-0.549611	-0.882291	-0.339405	RAB33B	turquoise
ENSG00000172037	0.420278	0.910529	-0.234214	-0.906365	-0.640059	LAMB2	turquoise
ENSG00000172057	0.404069	0.908404	-0.195101	-0.857249	-0.642511	ORMDL3	turquoise
ENSG00000172059	0.524822	0.969946	-0.302374	-0.976262	-0.618865	KLF11	turquoise
ENSG00000172071	0.726778	0.904536	-0.527652	-0.94951	-0.400933	EIF2AK3	turquoise
ENSG00000172086	0.460822	0.954083	-0.23975	-0.948875	-0.647843	KRCC1	turquoise
ENSG00000172183	0.293862	0.960353	-0.0673066	-0.906063	-0.78019	ISG20	turquoise
ENSG00000172216	0.165361	0.935671	0.086355	-0.856901	-0.84529	CEBPB	turquoise
ENSG00000172262	0.210753	0.500407	-0.141562	-0.542445	-0.365383	ZNF131	turquoise
ENSG00000172346	0.317037	0.762123	-0.111859	-0.776773	-0.546901	CSDC2	turquoise
ENSG00000172432	0.384783	0.970543	-0.172105	-0.945107	-0.726608	GTPBP2	turquoise
ENSG00000172594	0.294267	0.951761	-0.048014	-0.896072	-0.771432	SMPDL3A	turquoise
ENSG00000172661	0.635769	0.777301	-0.515579	-0.848983	-0.338509	FAM21C	turquoise
ENSG00000172663	0.32229	0.795365	-0.136387	-0.764816	-0.588236	TMEM134	turquoise
ENSG00000172780	0.293243	0.882028	-0.0598512	-0.842506	-0.704394	RAB43	turquoise
ENSG00000172824	0.124317	0.878758	0.0795675	-0.843429	-0.825447	CES4A	turquoise
ENSG00000172830	-0.0642167	0.783498	0.264233	-0.700348	-0.871063	SSH3	turquoise
ENSG00000172840	0.740336	0.53039	-0.691763	-0.643716	-0.00687669	PDP2	turquoise
ENSG00000172889	-0.0802032	0.810144	0.267563	-0.728478	-0.90626	EGFL7	turquoise
ENSG00000172893	0.646098	0.929191	-0.447388	-0.937214	-0.487274	DHCR7	turquoise
ENSG00000172992	0.502729	0.378628	-0.432873	-0.502184	-0.0218928	DCAKD	turquoise
ENSG00000173064	-0.263189	0.386222	0.416612	-0.28662	-0.597143	HECTD4	turquoise
ENSG00000173156	0.234738	0.945964	0.00756507	-0.87525	-0.811669	RHOD	turquoise
ENSG00000173209	0.150774	0.906366	0.0502693	-0.847705	-0.837108	AHSA2	turquoise
ENSG00000173210	0.611793	0.941821	-0.390237	-0.958926	-0.524376	ABLIM3	turquoise
ENSG00000173230	0.616722	0.868712	-0.393527	-0.888473	-0.445964	GOLGB1	turquoise
ENSG00000173269	-0.375317	0.432197	0.470088	-0.332975	-0.730227	MMRN2	turquoise
ENSG00000173275	0.566288	0.900167	-0.390641	-0.924788	-0.526006	ZNF449	turquoise
ENSG00000173334	0.635374	0.776211	-0.454448	-0.772298	-0.334917	TRIB1	turquoise
ENSG00000173465	0.14331	0.81136	0.0698663	-0.730562	-0.74541	SSSCA1	turquoise
ENSG00000173511	-0.355644	0.533867	0.56102	-0.400016	-0.814955	VEGFB	turquoise
ENSG00000173531	0.122687	0.806817	0.0901298	-0.740252	-0.748862	MST1	turquoise
ENSG00000173545	0.0693778	0.860158	0.169757	-0.743187	-0.839353	ZNF622	turquoise
ENSG00000173548	0.48891	0.847423	-0.280609	-0.816712	-0.511008	SNX33	turquoise
ENSG00000173559	0.34482	0.693254	-0.16057	-0.615407	-0.466726	NABP1	turquoise
ENSG00000173575	0.607731	0.664661	-0.43708	-0.750703	-0.235147	CHD2	turquoise
ENSG00000173621	0.144003	0.834996	0.0954739	-0.768285	-0.756453	LRFN4	turquoise
ENSG00000173681	-0.0539374	0.789209	0.260323	-0.695727	-0.859547	CXorf23	turquoise
ENSG00000173801	0.712504	0.76008	-0.502701	-0.795117	-0.250119	JUP	turquoise
ENSG00000173812	0.311484	0.979482	-0.0982989	-0.948444	-0.788381	EIF1	turquoise
ENSG00000173818	0.198967	0.905759	0.0206682	-0.846615	-0.795198	ENDOV	turquoise
ENSG00000173846	0.255054	0.72731	-0.110325	-0.674178	-0.569128	PLK3	turquoise
ENSG00000173992	-0.0401043	0.704401	0.243868	-0.619825	-0.752722	CCS	turquoise
ENSG00000174021	0.11239	0.765825	0.147844	-0.646441	-0.708302	GNG5	turquoise
ENSG00000174109	-0.455234	0.440919	0.624501	-0.302276	-0.796896	C16orf91	turquoise
ENSG00000174132	0.160876	0.860452	0.0609507	-0.800708	-0.78342	FAM174A	turquoise
ENSG00000174227	-0.0734727	0.714793	0.28757	-0.639193	-0.809602	PIGG	turquoise
ENSG00000174282	0.849831	0.761172	-0.718008	-0.848697	-0.156373	ZBTB4	turquoise
ENSG00000174307	0.331245	0.947831	-0.0995053	-0.903885	-0.736756	PHLDA3	turquoise
ENSG00000174327	0.294877	0.868637	-0.106037	-0.816032	-0.680311	SLC16A13	turquoise
ENSG00000174365	-0.127137	0.679344	0.301879	-0.587427	-0.811661	SNHG11	turquoise
ENSG00000174405	0.546033	0.836776	-0.369609	-0.844074	-0.457599	LIG4	turquoise
ENSG00000174444	0.611926	0.889715	-0.427745	-0.929835	-0.46634	RPL4	turquoise
ENSG00000174485	0.544366	0.916051	-0.359115	-0.928897	-0.549553	DENND4A	turquoise
ENSG00000174669	0.455624	0.969461	-0.220633	-0.943767	-0.670794	SLC29A2	turquoise
ENSG00000174718	0.545388	0.905306	-0.330295	-0.92358	-0.534669	KIAA1551	turquoise
ENSG00000174738	0.218604	0.867374	0.0369039	-0.828455	-0.745698	NR1D2	turquoise
ENSG00000174748	0.220311	0.820752	-0.067166	-0.831686	-0.700473	RPL15	turquoise
ENSG00000174851	0.467946	0.965143	-0.244152	-0.939551	-0.658544	YIF1A	turquoise
ENSG00000174917	-0.240718	0.737676	0.468254	-0.592007	-0.946072	C19orf70	turquoise
ENSG00000174928	-0.293311	0.517499	0.433126	-0.383536	-0.767356	C3orf33	turquoise
ENSG00000174938	0.56095	0.890439	-0.358722	-0.924799	-0.516281	SEZ6L2	turquoise
ENSG00000174939	-0.156234	0.804442	0.363807	-0.676937	-0.953959	ASPHD1	turquoise
ENSG00000174943	0.374702	0.867987	-0.157394	-0.865715	-0.624547	KCTD13	turquoise
ENSG00000174996	0.36596	0.71162	-0.181511	-0.665138	-0.467913	KLC2	turquoise
ENSG00000175087	0.296143	0.810615	-0.128087	-0.794687	-0.636915	PDIK1L	turquoise
ENSG00000175137	0.392729	0.985106	-0.163723	-0.951666	-0.730635	SH3BP5L	turquoise
ENSG00000175155	0.117073	0.830072	0.0652525	-0.805785	-0.7803	YPEL2	turquoise
ENSG00000175182	0.51905	0.930658	-0.321415	-0.919674	-0.579648	FAM131A	turquoise
ENSG00000175197	0.392951	0.996451	-0.172206	-0.968949	-0.747043	DDIT3	turquoise
ENSG00000175220	0.678052	0.825157	-0.5242	-0.850059	-0.357018	ARHGAP1	turquoise
ENSG00000175224	0.56061	0.830599	-0.414611	-0.85459	-0.459927	ATG13	turquoise
ENSG00000175309	0.563343	0.78286	-0.440695	-0.832579	-0.394532	PHYKPL	turquoise
ENSG00000175348	0.280776	0.812649	-0.050603	-0.724855	-0.637169	TMEM9B	turquoise
ENSG00000175387	0.574347	0.807098	-0.41079	-0.843207	-0.420015	SMAD2	turquoise
ENSG00000175390	0.197754	0.931925	0.0517733	-0.877962	-0.818075	EIF3F	turquoise
ENSG00000175467	-0.341362	0.489602	0.480822	-0.375271	-0.762574	SART1	turquoise
ENSG00000175482	0.228603	0.940441	0.00586339	-0.886947	-0.807474	POLD4	turquoise
ENSG00000175567	0.430597	0.945256	-0.211133	-0.945255	-0.670081	UCP2	turquoise
ENSG00000175582	0.812089	0.836821	-0.644708	-0.908044	-0.267237	RAB6A	turquoise
ENSG00000175727	0.475938	0.979696	-0.23691	-0.97664	-0.665958	MLXIP	turquoise
ENSG00000175764	0.212178	0.855754	-0.00830223	-0.785245	-0.739729	TTLL11	turquoise
ENSG00000175793	0.304771	0.986328	-0.0672394	-0.929316	-0.799099	SFN	turquoise
ENSG00000175806	-0.14925	0.531309	0.287415	-0.422655	-0.66395	MSRA	turquoise
ENSG00000175854	0.0486727	0.711681	0.156626	-0.629749	-0.692425	SWI5	turquoise
ENSG00000175893	0.594251	0.661386	-0.450866	-0.69163	-0.248904	ZDHHC21	turquoise
ENSG00000175895	0.347803	0.777788	-0.134494	-0.732333	-0.539449	PLEKHF2	turquoise
ENSG00000175938	0.354328	0.90086	-0.159079	-0.898653	-0.683847	ORAI3	turquoise
ENSG00000176018	0.595589	0.936471	-0.403634	-0.949591	-0.54097	LYSMD3	turquoise
ENSG00000176022	-0.310195	0.561417	0.530554	-0.392113	-0.808192	B3GALT6	turquoise
ENSG00000176046	0.444713	0.98606	-0.221901	-0.981033	-0.697769	NUPR1	turquoise
ENSG00000176055	0.475004	0.559443	-0.419337	-0.596361	-0.225053	MBLAC2	turquoise
ENSG00000176142	0.717247	0.844886	-0.568727	-0.892112	-0.352932	TMEM39A	turquoise
ENSG00000176155	-0.187071	0.606611	0.34303	-0.524325	-0.777583	CCDC57	turquoise
ENSG00000176343	-0.0991124	0.736882	0.262977	-0.643794	-0.831413	RPL37AP8	turquoise
ENSG00000176428	-0.256186	0.64772	0.427643	-0.55961	-0.859848	VPS37D	turquoise
ENSG00000176438	0.719792	0.852113	-0.513595	-0.912827	-0.353564	SYNE3	turquoise
ENSG00000176454	0.465409	0.851484	-0.279255	-0.819867	-0.543134	LPCAT4	turquoise
ENSG00000176473	-0.252201	0.548414	0.355827	-0.494974	-0.769511	WDR25	turquoise
ENSG00000176485	0.154506	0.925585	0.0904569	-0.857027	-0.849038	PLA2G16	turquoise
ENSG00000176490	0.451964	0.906514	-0.250889	-0.926864	-0.607495	DIRAS1	turquoise
ENSG00000176597	0.750911	0.84662	-0.555275	-0.891266	-0.32208	B3GNT5	turquoise
ENSG00000176731	-0.149246	0.623644	0.304501	-0.531597	-0.765035	C8orf59	turquoise
ENSG00000176903	0.185175	0.655055	-0.0010696	-0.668348	-0.54565	PNMA1	turquoise
ENSG00000176973	0.336734	0.96374	-0.0916118	-0.931221	-0.752099	FAM89B	turquoise
ENSG00000176978	-0.454803	0.373601	0.53022	-0.280641	-0.737917	DPP7	turquoise
ENSG00000177000	0.718477	0.8579	-0.520039	-0.902567	-0.357378	MTHFR	turquoise
ENSG00000177034	0.682565	0.711979	-0.571937	-0.798428	-0.240772	MTX3	turquoise
ENSG00000177042	0.237718	0.880754	-0.0137589	-0.844744	-0.737151	TMEM80	turquoise
ENSG00000177106	0.515881	0.87101	-0.294502	-0.891802	-0.527122	EPS8L2	turquoise
ENSG00000177169	0.557486	0.949152	-0.343545	-0.954887	-0.574964	ULK1	turquoise
ENSG00000177383	0.275935	0.872379	-0.0797925	-0.824844	-0.699573	MAGEF1	turquoise
ENSG00000177410	-0.0688763	0.865095	0.275628	-0.755049	-0.951525	ZFAS1	turquoise
ENSG00000177548	-0.136436	0.539407	0.325308	-0.421825	-0.646775	RABEP2	turquoise
ENSG00000177576	0.297175	0.793712	-0.0923906	-0.737392	-0.593185	C18orf32	turquoise
ENSG00000177606	0.496483	0.988218	-0.279372	-0.975526	-0.659453	JUN	turquoise
ENSG00000177666	0.423578	0.974201	-0.200597	-0.965447	-0.70008	PNPLA2	turquoise
ENSG00000177685	0.0590668	0.840676	0.192046	-0.760758	-0.826405	CRACR2B	turquoise
ENSG00000177697	0.662425	0.886425	-0.447026	-0.904938	-0.43397	CD151	turquoise
ENSG00000177721	0.0198532	0.746628	0.191254	-0.650917	-0.753374	ANXA2R	turquoise
ENSG00000177732	0.237883	0.791334	-0.0343027	-0.791798	-0.635758	SOX12	turquoise
ENSG00000177951	0.708885	0.888657	-0.518596	-0.926507	-0.401758	BET1L	turquoise
ENSG00000177954	-0.0854004	0.781601	0.247269	-0.685543	-0.88413	RPS27	turquoise
ENSG00000178026	0.301466	0.911294	-0.0938865	-0.872571	-0.718848	LRRC75B	turquoise
ENSG00000178035	-0.259096	0.119357	0.263828	-0.147461	-0.312859	IMPDH2	turquoise
ENSG00000178038	0.48786	0.939339	-0.257055	-0.927463	-0.609683	ALS2CL	turquoise
ENSG00000178053	0.59735	0.68771	-0.479407	-0.763971	-0.269595	MLF1	turquoise
ENSG00000178104	0.392674	0.908382	-0.138606	-0.879183	-0.650366	PDE4DIP	turquoise
ENSG00000178149	0.323255	0.881843	-0.111351	-0.857027	-0.678867	DALRD3	turquoise
ENSG00000178209	0.785869	0.72804	-0.633474	-0.798835	-0.170265	PLEC	turquoise
ENSG00000178381	0.0702224	0.874485	0.165747	-0.765308	-0.854671	ZFAND2A	turquoise
ENSG00000178449	0.00459207	0.761472	0.196162	-0.665421	-0.776717	COX14	turquoise
ENSG00000178467	0.325796	0.937851	-0.0990587	-0.889169	-0.735565	P4HTM	turquoise
ENSG00000178498	0.298518	0.855794	-0.112897	-0.825717	-0.674832	DTX3	turquoise
ENSG00000178531	-0.250095	0.528754	0.443539	-0.43897	-0.723389	CTXN1	turquoise
ENSG00000178537	0.105613	0.647417	0.0623196	-0.604165	-0.594435	SLC25A20	turquoise
ENSG00000178607	0.614603	0.834262	-0.454297	-0.854078	-0.407801	ERN1	turquoise
ENSG00000178726	0.0597888	0.73662	0.151202	-0.602199	-0.721192	THBD	turquoise
ENSG00000178761	0.437179	0.909552	-0.271669	-0.903359	-0.626604	FAM219B	turquoise
ENSG00000178773	-0.00720941	0.641175	0.123294	-0.548366	-0.686606	CPNE7	turquoise
ENSG00000178814	0.202782	0.918666	0.027298	-0.843997	-0.809404	OPLAH	turquoise
ENSG00000178821	0.274213	0.801045	-0.084053	-0.740027	-0.616736	TMEM52	turquoise
ENSG00000178913	0.165206	0.797062	-0.0364575	-0.739508	-0.703827	TAF7	turquoise
ENSG00000178922	-0.38412	0.388976	0.44813	-0.304976	-0.697344	HYI	turquoise
ENSG00000178988	-0.0413616	0.658535	0.255085	-0.549248	-0.695507	MRFAP1L1	turquoise
ENSG00000178996	0.332091	0.910145	-0.158723	-0.879542	-0.701078	SNX18	turquoise
ENSG00000179085	-0.27568	0.567276	0.406879	-0.475193	-0.791035	DPM3	turquoise
ENSG00000179119	0.74962	0.655542	-0.653342	-0.733	-0.135673	SPTY2D1	turquoise
ENSG00000179152	0.653876	0.803473	-0.472312	-0.847271	-0.346928	TCAIM	turquoise
ENSG00000179163	0.619472	0.906682	-0.407092	-0.910207	-0.475703	FUCA1	turquoise
ENSG00000179222	0.633835	0.793888	-0.467182	-0.822316	-0.365316	MAGED1	turquoise
ENSG00000179277	-0.41982	0.344861	0.512259	-0.173623	-0.673849	MEIS3P1	turquoise
ENSG00000179292	0.482922	0.976187	-0.244558	-0.955981	-0.656471	TMEM151A	turquoise
ENSG00000179364	0.237302	0.818709	-0.0835217	-0.794451	-0.678074	PACS2	turquoise
ENSG00000179403	0.613824	0.766437	-0.399438	-0.814192	-0.345835	VWA1	turquoise
ENSG00000179456	0.523675	0.553523	-0.447359	-0.566067	-0.183919	ZBTB18	turquoise
ENSG00000179562	0.504522	0.976139	-0.277433	-0.969521	-0.638628	GCC1	turquoise
ENSG00000179632	0.410449	0.970644	-0.208942	-0.953792	-0.707223	MAF1	turquoise
ENSG00000179766	0.455872	0.746078	-0.289898	-0.755311	-0.434934	ATP8B5P	turquoise
ENSG00000179832	0.598068	0.825176	-0.405357	-0.843738	-0.410595	MROH1	turquoise
ENSG00000179833	0.690097	0.779257	-0.531098	-0.829909	-0.293542	SERTAD2	turquoise
ENSG00000179913	0.303725	0.837838	-0.0712486	-0.802196	-0.651688	B3GNT3	turquoise
ENSG00000179918	0.364243	0.987241	-0.136575	-0.95575	-0.756812	SEPHS2	turquoise
ENSG00000180138	0.489181	0.824867	-0.324521	-0.847865	-0.504729	CSNK1A1L	turquoise
ENSG00000180155	0.549978	0.879426	-0.376598	-0.885941	-0.508244	LYNX1	turquoise
ENSG00000180354	0.131871	0.826654	0.0318741	-0.790874	-0.76086	MTURN	turquoise
ENSG00000180488	0.723543	0.702718	-0.580401	-0.752407	-0.192451	FAM73A	turquoise
ENSG00000180573	0.472521	0.965148	-0.254442	-0.956627	-0.652175	HIST1H2AC	turquoise
ENSG00000180611	0.272694	0.878831	-0.075981	-0.798724	-0.707338	MB21D2	turquoise
ENSG00000180879	-0.178905	0.716181	0.382779	-0.567064	-0.870532	SSR4	turquoise
ENSG00000180901	0.696882	0.823408	-0.540287	-0.883267	-0.339691	KCTD2	turquoise
ENSG00000180964	0.676719	0.894881	-0.510658	-0.935336	-0.43741	TCEAL8	turquoise
ENSG00000181004	0.423602	0.776271	-0.239725	-0.794358	-0.503121	BBS12	turquoise
ENSG00000181019	0.313417	0.939309	-0.148459	-0.919596	-0.750688	NQO1	turquoise
ENSG00000181191	0.267745	0.821595	-0.0394465	-0.78972	-0.650136	PJA1	turquoise
ENSG00000181218	0.133569	0.817321	-0.00136925	-0.796982	-0.751519	HIST3H2A	turquoise
ENSG00000181260	0.518584	0.965541	-0.308252	-0.977387	-0.622169	MTHFD2P7	turquoise
ENSG00000181264	-0.0123675	0.683936	0.194299	-0.622899	-0.72939	TMEM136	turquoise
ENSG00000181274	0.177312	0.857416	0.0421359	-0.827108	-0.760436	FRAT2	turquoise
ENSG00000181444	0.492304	0.844216	-0.297015	-0.890194	-0.507349	ZNF467	turquoise
ENSG00000181458	0.253393	0.251418	-0.143242	-0.264185	-0.0558518	TMEM45A	turquoise
ENSG00000181467	0.29637	0.832353	-0.159402	-0.856421	-0.647988	RAP2B	turquoise
ENSG00000181513	0.386973	0.80373	-0.243929	-0.782058	-0.562022	ACBD4	turquoise
ENSG00000181588	0.336247	0.901001	-0.127114	-0.874449	-0.680445	MEX3D	turquoise
ENSG00000181652	0.571456	0.85349	-0.37444	-0.853676	-0.456969	ATG9B	turquoise
ENSG00000181788	0.3184	0.836718	-0.14174	-0.808446	-0.638616	SIAH2	turquoise
ENSG00000181789	0.666406	0.872996	-0.469131	-0.893406	-0.410228	COPG1	turquoise
ENSG00000181817	-0.161696	0.77138	0.404238	-0.632806	-0.923074	LSM10	turquoise
ENSG00000181830	0.449568	0.779491	-0.280873	-0.74303	-0.477263	SLC35C1	turquoise
ENSG00000181852	0.750684	0.589504	-0.617394	-0.681447	-0.0556669	RNF41	turquoise
ENSG00000181885	0.489965	0.977201	-0.252538	-0.970316	-0.651551	CLDN7	turquoise
ENSG00000181894	0.152915	0.806806	0.0500658	-0.742866	-0.723647	ZNF329	turquoise
ENSG00000182093	0.350792	0.938473	-0.149447	-0.927876	-0.71541	WRB	turquoise
ENSG00000182117	-0.265686	0.644758	0.489519	-0.472088	-0.864606	NOP10	turquoise
ENSG00000182134	0.245449	0.896761	-0.0161956	-0.820531	-0.753872	TDRKH	turquoise
ENSG00000182154	-0.527768	0.506447	0.693413	-0.3462	-0.919227	MRPL41	turquoise
ENSG00000182165	0.073723	0.857645	0.156822	-0.779178	-0.833819	TP53TG1	turquoise
ENSG00000182179	0.119845	0.712672	0.0290372	-0.693639	-0.669567	UBA7	turquoise
ENSG00000182197	0.727338	0.602373	-0.592692	-0.644221	-0.0909797	EXT1	turquoise
ENSG00000182208	0.254494	0.934563	0.00633858	-0.881959	-0.779702	MOB2	turquoise
ENSG00000182272	0.17146	0.807944	-0.00794953	-0.80001	-0.715803	B4GALNT4	turquoise
ENSG00000182351	0.387274	0.978388	-0.142028	-0.948148	-0.73234	CRIP1P4	turquoise
ENSG00000182359	-0.290862	0.593738	0.463619	-0.472843	-0.834863	KBTBD3	turquoise
ENSG00000182400	0.653725	0.751024	-0.521212	-0.823091	-0.305201	TRAPPC6B	turquoise
ENSG00000182472	0.517124	0.949624	-0.27525	-0.956675	-0.607084	CAPN12	turquoise
ENSG00000182484	-0.0748808	0.636643	0.296636	-0.512542	-0.710148	WASH6P	turquoise
ENSG00000182606	0.750572	0.822154	-0.559396	-0.888256	-0.300059	TRAK1	turquoise
ENSG00000182670	0.551958	0.814898	-0.379304	-0.855752	-0.451711	TTC3	turquoise
ENSG00000182685	-0.117689	0.664603	0.29181	-0.586827	-0.785376	BRICD5	turquoise
ENSG00000182700	0.318361	0.865185	-0.115071	-0.826626	-0.654508	IGIP	turquoise
ENSG00000182712	0.107982	0.793676	0.113023	-0.718167	-0.739901	CMC4	turquoise
ENSG00000182796	0.479778	0.740285	-0.381528	-0.80028	-0.419104	TMEM198B	turquoise
ENSG00000182809	0.397483	0.993591	-0.158535	-0.966196	-0.740138	CRIP2	turquoise
ENSG00000182827	0.754014	0.735256	-0.649968	-0.817082	-0.211062	ACBD3	turquoise
ENSG00000182831	0.475782	0.782632	-0.300087	-0.770971	-0.452561	C16orf72	turquoise
ENSG00000182871	0.305013	0.909771	-0.0448187	-0.867028	-0.720935	COL18A1	turquoise
ENSG00000182919	0.609583	0.87594	-0.427205	-0.916263	-0.465061	C11orf54	turquoise
ENSG00000182952	0.177377	0.813426	-0.00493683	-0.768912	-0.709616	HMGN4	turquoise
ENSG00000183018	0.341185	0.938116	-0.106465	-0.873205	-0.723394	SPNS2	turquoise
ENSG00000183060	0.131882	0.83006	0.0808861	-0.767264	-0.764151	LYSMD4	turquoise
ENSG00000183087	0.38119	0.943435	-0.149477	-0.938595	-0.699542	GAS6	turquoise
ENSG00000183155	0.0871186	0.835933	0.173387	-0.732575	-0.803602	RABIF	turquoise
ENSG00000183186	0.156451	0.745086	0.0666384	-0.729367	-0.654721	C2CD4C	turquoise
ENSG00000183214	0.0815836	0.680226	0.118306	-0.574963	-0.644145	MICA	turquoise
ENSG00000183317	0.221441	0.868924	-0.0272851	-0.851707	-0.747215	EPHA10	turquoise
ENSG00000183340	0.361218	0.945784	-0.117166	-0.91078	-0.715605	JRKL	turquoise
ENSG00000183386	-0.0360935	0.733156	0.249948	-0.62193	-0.796476	FHL3	turquoise
ENSG00000183401	0.00750929	0.441439	0.109911	-0.385521	-0.451514	CCDC159	turquoise
ENSG00000183495	-0.267693	0.143158	0.37344	-0.0667144	-0.332478	EP400	turquoise
ENSG00000183496	0.444828	0.862454	-0.220122	-0.841824	-0.555515	MEX3B	turquoise
[truncated: 4,053 more rows]

## Sheet: datKME-MP2-8modules
Table SI. Genes in the WGCNA modules of MiaPACa2 and PANC1 cells.
Genes	kMEblue	kMEcyan	kMEdarkturquoise	kMEmidnightblue	kMEblack	kMEgreenyellow	kMEdarkgrey	kMEdarkorange	data$gene_short_name	moduleColors
ENSG00000000460	0.81253	0.936821	0.0401243	0.372538	-0.934066	-0.760326	-0.389968	-0.232859	C1orf112	cyan
ENSG00000001036	0.663403	0.779828	0.376876	0.176117	-0.87057	-0.578981	-0.572674	0.0287119	FUCA2	cyan
ENSG00000001084	-0.947259	-0.795515	0.165498	-0.0344631	0.856309	0.919389	0.132994	-0.110652	GCLC	greenyellow
ENSG00000001167	0.585414	0.662834	-0.268893	0.376918	-0.577303	-0.591195	-0.0516567	-0.354589	NFYA	blue
ENSG00000001497	0.588375	0.975072	0.419245	0.603238	-0.958409	-0.507089	-0.703222	-0.42784	LAS1L	cyan
ENSG00000001629	-0.814753	-0.797445	0.0915916	-0.193862	0.821158	0.787863	0.22765	0.0651087	ANKIB1	greenyellow
ENSG00000001630	-0.389584	-0.388477	0.437233	-0.27978	0.266897	0.437988	-0.232495	0.349831	CYP51A1	greenyellow
ENSG00000002016	-0.771485	-0.403309	0.298094	0.323677	0.510907	0.765584	-0.120845	-0.397985	RAD52	greenyellow
ENSG00000108947	0.168404	-0.521126	-0.917112	-0.718388	0.485757	-0.277472	0.969772	0.574746	EFNB3	darkgrey
ENSG00000002822	0.1227	0.288594	0.709788	0.000147123	-0.42267	-0.0399154	-0.60187	0.197102	MAD1L1	blue
ENSG00000090006	-0.00616687	-0.622483	-0.876284	-0.659157	0.615295	-0.113523	0.969221	0.487659	LTBP4	darkgrey
ENSG00000226666	-0.371838	0.292615	0.984271	0.603085	-0.276353	0.473214	-0.917355	-0.473728	HSPA9P1	darkturquoise
ENSG00000003147	-0.761525	-0.786002	0.221177	-0.318461	0.745667	0.748004	0.115779	0.235611	ICA1	greenyellow
ENSG00000003249	-0.200817	-0.702575	-0.702019	-0.575747	0.698076	0.117769	0.815136	0.395505	DBNDD1	black
ENSG00000003393	-0.658593	-0.397044	0.308936	0.145621	0.44561	0.688053	-0.181457	-0.221816	ALS2	greenyellow
ENSG00000003400	0.89604	0.70904	-0.161949	-0.0436398	-0.781965	-0.871583	-0.0966527	0.173304	CASP10	blue
ENSG00000003402	0.217236	0.341729	0.230235	0.166336	-0.348088	-0.208075	-0.210558	-0.0865206	CFLAR	cyan
ENSG00000247627	0.107697	-0.573314	-0.853565	-0.739607	0.532174	-0.216557	0.962396	0.60852	MTND4P12	darkgrey
ENSG00000004059	-0.552125	-0.954091	-0.473649	-0.596261	0.943908	0.460164	0.74471	0.419379	ARF5	black
ENSG00000004139	0.329865	0.330498	0.356791	-0.0833687	-0.43387	-0.281129	-0.32048	0.221944	SARM1	blue
ENSG00000004142	0.30771	0.808859	0.205449	0.827452	-0.667313	-0.260238	-0.522538	-0.769942	POLDIP2	cyan
ENSG00000004455	0.847943	0.739199	-0.0137945	0.0154239	-0.826803	-0.795137	-0.259398	0.130846	AK2	blue
ENSG00000004487	0.851385	0.839128	-0.106307	0.228897	-0.855553	-0.812851	-0.230572	-0.106545	KDM1A	blue
ENSG00000004660	-0.587169	-0.9336	-0.487922	-0.503873	0.951366	0.497085	0.724414	0.316369	CAMKK1	black
ENSG00000004766	-0.852633	-0.751476	0.0371552	-0.0431015	0.829504	0.806115	0.240406	-0.0932334	CCDC132	greenyellow
ENSG00000004779	0.793868	0.807143	-0.287866	0.327068	-0.754434	-0.789107	-0.0732962	-0.26745	NDUFAB1	blue
ENSG00000142192	0.194027	-0.532047	-0.865241	-0.800452	0.471126	-0.299099	0.960312	0.675262	APP	darkgrey
ENSG00000004866	-0.795046	-0.461604	0.288019	0.252097	0.556462	0.797459	-0.121211	-0.371371	ST7	greenyellow
ENSG00000004961	-0.411079	0.311415	0.778403	0.786202	-0.205209	0.495143	-0.790875	-0.722059	HCCS	greenyellow
ENSG00000004975	-0.781774	-0.709924	0.354328	-0.21091	0.67653	0.795504	-0.0242518	0.15074	DVL2	greenyellow
ENSG00000005007	-0.403131	0.161616	0.447155	0.677274	-0.0330103	0.450123	-0.491872	-0.676938	UPF1	greenyellow
ENSG00000181444	0.132145	-0.498441	-0.928004	-0.627409	0.491794	-0.247704	0.956304	0.468625	ZNF467	darkgrey
ENSG00000005022	0.177671	0.818968	0.5398	0.885343	-0.710714	-0.0990028	-0.790518	-0.774667	SLC25A5	cyan
ENSG00000005075	-0.556179	-0.29766	-0.0145301	0.319155	0.445027	0.50386	0.122884	-0.44094	POLR2J	greenyellow
ENSG00000005100	-0.712894	-0.0351556	0.500904	0.75883	0.21212	0.742011	-0.468284	-0.821137	DHX33	greenyellow
ENSG00000005206	0.374909	-0.00233258	-0.729514	-0.222183	0.0384728	-0.464165	0.630119	0.149664	SPPL2B	blue
ENSG00000005249	0.890376	0.777899	-0.289488	0.141616	-0.779285	-0.883782	-0.0341954	-0.0623064	PRKAR2B	blue
ENSG00000005339	-0.870204	-0.617065	0.247886	0.112294	0.686771	0.847369	-0.00746553	-0.231376	CREBBP	greenyellow
ENSG00000005448	0.975357	0.634506	-0.247575	-0.240781	-0.754229	-0.953258	0.0120794	0.378968	WDR54	blue
ENSG00000005469	0.317596	0.321256	-0.419807	0.244224	-0.201537	-0.374603	0.230662	-0.323728	CROT	blue
ENSG00000122705	-0.461098	0.211651	0.956864	0.616027	-0.180805	0.559249	-0.878193	-0.506386	CLTA	darkturquoise
ENSG00000172037	0.0738043	-0.641308	-0.831817	-0.821023	0.575965	-0.176321	0.953209	0.696678	LAMB2	darkgrey
ENSG00000005700	-0.777391	-0.91172	-0.215916	-0.30945	0.949846	0.713398	0.488552	0.127681	IBTK	black
ENSG00000005810	-0.648742	-0.55576	-0.134147	0.065746	0.666274	0.596162	0.271913	-0.198588	MYCBP2	black
ENSG00000005812	0.110662	-0.447796	-0.261469	-0.801814	0.284616	-0.13711	0.450435	0.809419	FBXL3	darkorange
ENSG00000005884	0.726437	0.58696	-0.104014	-0.0260116	-0.6339	-0.727021	-0.0337102	0.139995	ITGA3	blue
ENSG00000005893	-0.138559	-0.578481	-0.0432937	-0.760567	0.402227	0.136864	0.273273	0.762582	LAMP2	darkorange
ENSG00000006007	-0.774495	-0.465274	0.135522	0.28511	0.590241	0.745511	0.0129039	-0.403725	GDE1	greenyellow
ENSG00000006016	-0.0574425	-0.718384	-0.509987	-0.900274	0.579263	0.000629821	0.696596	0.831414	CRLF1	darkorange
ENSG00000006062	0.62271	0.975843	0.350068	0.577422	-0.954119	-0.547688	-0.648852	-0.423607	MAP3K14	cyan
ENSG00000006118	0.841965	0.70707	-0.190973	0.0442826	-0.745105	-0.827433	-0.083683	0.0785977	TMEM132A	blue
ENSG00000006125	-0.726633	-0.899225	-0.339637	-0.309604	0.962599	0.643214	0.601729	0.105573	AP2B1	black
ENSG00000006194	-0.70715	-0.428875	0.563106	0.0627374	0.415709	0.748517	-0.321497	-0.0494557	ZNF263	greenyellow
ENSG00000006282	0.49861	-0.258132	-0.571415	-0.907512	0.078809	-0.545148	0.639013	0.918872	SPATA20	darkorange
ENSG00000006327	-0.818964	-0.788148	0.089161	-0.174989	0.815848	0.78543	0.218841	0.056419	TNFRSF12A	greenyellow
ENSG00000006451	-0.900137	-0.816853	0.0692163	-0.0986975	0.873697	0.864491	0.214796	-0.0508469	RALA	greenyellow
ENSG00000006468	0.780365	0.921013	0.245611	0.309246	-0.96805	-0.712394	-0.519979	-0.122023	ETV1	cyan
ENSG00000006530	0.474879	0.434394	-0.433623	0.228168	-0.33818	-0.518636	0.205286	-0.261795	AGK	blue
ENSG00000006534	0.440321	0.174018	0.190921	-0.423695	-0.376694	-0.384491	-0.192579	0.594582	ALDH3B1	blue
ENSG00000124593	0.120884	-0.595376	-0.844787	-0.80505	0.532613	-0.222811	0.950871	0.680865	PRICKLE4	darkgrey
ENSG00000006625	0.804088	0.934314	0.0431963	0.379934	-0.92737	-0.766519	-0.361213	-0.251939	GGCT	cyan
ENSG00000006634	0.584635	0.907609	0.24713	0.552957	-0.869649	-0.524413	-0.559516	-0.434123	DBF4	cyan
ENSG00000006652	-0.91607	-0.821233	0.140873	-0.111857	0.864548	0.883187	0.177867	-0.0200666	IFRD1	greenyellow
ENSG00000006704	-0.762372	-0.632798	0.183578	-0.0332587	0.667027	0.758991	0.0342525	-0.0476777	GTF2IRD1	black
ENSG00000254598	-0.273057	0.282267	0.956805	0.464679	-0.31285	0.382496	-0.888956	-0.304368	CSNK2A3	darkturquoise
ENSG00000006715	-0.401887	-0.751758	-0.542393	-0.446502	0.78082	0.311547	0.718247	0.283807	VPS41	black
ENSG00000006744	-0.54645	-0.0084523	0.26939	0.647121	0.177448	0.556232	-0.310242	-0.756905	ELAC2	greenyellow
ENSG00000007080	-0.571563	-0.141174	0.156808	0.526082	0.316312	0.549562	-0.0969799	-0.623261	CCDC124	greenyellow
ENSG00000007168	-0.535355	-0.193333	0.551674	0.211016	0.186832	0.600001	-0.459021	-0.191643	PAFAH1B1	greenyellow
ENSG00000075223	-0.0772281	-0.587659	-0.896948	-0.485613	0.63615	-0.0445567	0.950848	0.281038	SEMA3C	darkgrey
ENSG00000007384	-0.788897	-0.713158	0.072369	-0.0825948	0.754551	0.767439	0.151689	-0.0388077	RHBDF1	black
ENSG00000007516	0.193081	-0.461087	-0.452992	-0.852012	0.30968	-0.248242	0.636192	0.835043	BAIAP3	darkorange
ENSG00000007520	-0.619333	-0.556575	-0.27252	0.093515	0.695477	0.548993	0.392425	-0.255754	TSR3	black
ENSG00000007541	-0.427882	-0.736424	-0.574053	-0.367312	0.790407	0.331956	0.729716	0.16311	PIGQ	black
ENSG00000007545	-0.807629	-0.46219	0.384571	0.235209	0.537224	0.825616	-0.190068	-0.302632	CRAMP1L	greenyellow
ENSG00000007866	-0.697438	-0.15707	0.271619	0.629606	0.338463	0.699644	-0.248133	-0.738218	TEAD3	greenyellow
ENSG00000007923	0.486883	0.89983	0.273758	0.677897	-0.834269	-0.425992	-0.602421	-0.564224	DNAJC11	cyan
ENSG00000007968	0.736765	0.956943	0.190794	0.454896	-0.954635	-0.670466	-0.517411	-0.30191	E2F2	cyan
ENSG00000008018	0.734057	0.944871	0.00137212	0.519774	-0.887759	-0.696833	-0.365067	-0.412626	PSMB1	cyan
ENSG00000008083	0.553433	0.0210968	-0.236819	-0.66999	-0.209323	-0.546121	0.236244	0.76309	JARID2	blue
ENSG00000008256	-0.361545	-0.449499	-0.390461	-0.0552685	0.528569	0.310221	0.385842	-0.0968814	CYTH3	black
ENSG00000008277	0.835481	0.313728	-0.539905	-0.452585	-0.419795	-0.851771	0.350962	0.512906	ADAM22	blue
ENSG00000008283	-0.301721	-0.26311	-0.430129	0.184761	0.422239	0.218217	0.430314	-0.351854	CYB561	black
ENSG00000008294	-0.917871	-0.902659	0.0527307	-0.205938	0.936485	0.87764	0.2724	0.0625393	SPAG9	black
ENSG00000008324	0.613086	0.496337	-0.424916	0.118645	-0.454295	-0.647401	0.153415	-0.126189	SS18L2	blue
ENSG00000134684	-0.543065	0.144366	0.954759	0.619509	-0.102183	0.637698	-0.858448	-0.528885	YARS	darkturquoise
ENSG00000008710	0.140478	-0.487785	-0.350876	-0.871404	0.318049	-0.185281	0.547958	0.885989	PKD1	darkorange
ENSG00000008735	-0.96943	-0.76313	0.194378	0.0459402	0.840565	0.947581	0.0901383	-0.174104	MAPK8IP2	greenyellow
ENSG00000008988	-0.718088	-0.963937	-0.177318	-0.50057	0.943317	0.65582	0.509273	0.358587	RPS20	black
ENSG00000009780	-0.724733	-0.775641	-0.0769807	-0.22938	0.801897	0.682836	0.302122	0.0929256	FAM76A	black
ENSG00000009830	-0.89735	-0.458603	0.475022	0.328428	0.554112	0.906365	-0.238918	-0.408998	POMT2	greenyellow
ENSG00000009844	0.847981	0.821125	-0.11965	0.204468	-0.83677	-0.808219	-0.215074	-0.0870468	VTA1	blue
ENSG00000042286	-0.326519	0.264444	0.954557	0.503787	-0.270499	0.419413	-0.855963	-0.367383	AIFM2	darkturquoise
ENSG00000010165	0.31281	0.749827	0.343041	0.660453	-0.684196	-0.235715	-0.621392	-0.554043	METTL13	cyan
ENSG00000010219	-0.276555	-0.54273	0.168754	-0.578828	0.386813	0.281334	0.114526	0.609972	DYRK4	black
ENSG00000010278	-0.846823	-0.911927	0.0385621	-0.319008	0.915611	0.799665	0.322192	0.193735	CD9	black
ENSG00000010292	0.764704	0.926349	0.283612	0.32424	-0.971591	-0.696346	-0.536764	-0.131584	NCAPD2	cyan
ENSG00000010322	0.742037	0.0578845	-0.704502	-0.674328	-0.183143	-0.790911	0.596799	0.693393	NISCH	blue
ENSG00000010361	0.738329	0.229941	-0.544768	-0.454973	-0.334974	-0.758915	0.360312	0.504775	FUZ	blue
ENSG00000010404	-0.040386	-0.63866	-0.345784	-0.870105	0.488892	0.000673268	0.561785	0.83394	IDS	darkorange
ENSG00000010704	0.953472	0.484473	-0.552253	-0.330055	-0.571377	-0.972462	0.305408	0.393282	HFE	blue
ENSG00000182199	-0.10314	0.417138	0.948027	0.438937	-0.465881	0.215606	-0.911581	-0.25719	SHMT2	darkturquoise
ENSG00000011007	0.298839	0.771101	0.581006	0.624212	-0.744805	-0.20504	-0.755045	-0.459539	TCEB3	cyan
ENSG00000011021	-0.927816	-0.69673	0.249072	0.0744635	0.769679	0.920813	0.0166759	-0.185794	CLCN6	greenyellow
ENSG00000011052	0.639552	0.694873	-0.248138	0.34425	-0.622816	-0.645637	-0.0513909	-0.315174	NME2	blue
ENSG00000011132	-0.768916	-0.735916	0.213901	-0.214416	0.718881	0.748769	0.0936315	0.144033	APBA3	greenyellow
ENSG00000011243	-0.849139	-0.455464	0.549758	0.227145	0.505944	0.880127	-0.313118	-0.265087	AKAP8L	greenyellow
ENSG00000011258	0.677712	0.259866	-0.0957941	-0.508903	-0.451559	-0.645138	0.0147673	0.639127	MBTD1	blue
ENSG00000011260	0.118753	0.645972	0.43119	0.731604	-0.551659	-0.0442268	-0.644701	-0.672313	UTP18	cyan
ENSG00000011275	-0.85202	-0.497351	0.293324	0.277555	0.607824	0.834986	-0.0708561	-0.369685	RNF216	greenyellow
ENSG00000179222	-0.194704	-0.751339	-0.780039	-0.639102	0.754116	0.0767846	0.947972	0.454482	MAGED1	darkgrey
ENSG00000011304	0.182651	0.685166	0.536077	0.647584	-0.640606	-0.0984723	-0.748309	-0.531189	PTBP1	cyan
ENSG00000011347	-0.899609	-0.534916	0.467002	0.196365	0.595506	0.91426	-0.223578	-0.279361	SYT7	greenyellow
ENSG00000011376	0.590468	0.762234	-0.119611	0.469001	-0.683448	-0.582244	-0.200145	-0.423731	LARS2	cyan
ENSG00000011422	0.318256	0.514606	0.623493	0.133214	-0.615117	-0.2418	-0.604374	0.0648162	PLAUR	blue
ENSG00000011426	0.827174	0.952363	0.141954	0.333469	-0.977249	-0.769139	-0.450797	-0.167791	ANLN	cyan
ENSG00000011451	-0.441959	-0.768398	-0.202608	-0.552389	0.708096	0.397442	0.466829	0.478667	WIZ	black
ENSG00000011478	0.914946	0.583337	-0.164197	-0.280644	-0.719845	-0.891466	-0.0164532	0.428832	QPCTL	blue
ENSG00000011485	0.656853	0.59515	-0.274312	0.172929	-0.58263	-0.649164	-0.0313573	-0.108444	PPP5C	blue
ENSG00000011638	-0.853472	-0.669146	0.430932	-0.069292	0.655338	0.869911	-0.130786	0.0287271	TMEM159	greenyellow
ENSG00000012048	0.660852	0.897811	0.348545	0.38509	-0.929189	-0.584268	-0.606646	-0.20913	BRCA1	cyan
ENSG00000012061	0.354953	-0.244605	-0.529256	-0.690368	0.134905	-0.426805	0.63862	0.67119	ERCC1	darkorange
ENSG00000105281	-0.376417	0.223143	0.946015	0.509167	-0.222018	0.468147	-0.845547	-0.38312	SLC1A5	darkturquoise
ENSG00000012171	0.690825	0.00878628	-0.45794	-0.787659	-0.19746	-0.717015	0.455816	0.865464	SEMA3B	darkorange
ENSG00000012174	0.91623	0.821964	-0.157853	0.122827	-0.860555	-0.883009	-0.168203	-0.00525426	MBTPS2	blue
ENSG00000012211	-0.325969	-0.704301	-0.0885394	-0.664084	0.593273	0.28133	0.422972	0.639964	PRICKLE3	black
ENSG00000012660	0.187907	0.0176497	-0.774651	0.0890879	0.124288	-0.268748	0.562189	-0.251846	ELOVL5	blue
ENSG00000012822	-0.449165	-0.921737	-0.302858	-0.770646	0.826154	0.386332	0.618994	0.660211	CALCOCO1	black
ENSG00000013297	0.963154	0.79482	-0.233157	0.0366614	-0.840335	-0.950373	-0.0601885	0.079707	CLDN11	blue
ENSG00000013306	0.668062	0.75629	0.0423995	0.289169	-0.751327	-0.64462	-0.254608	-0.170669	SLC25A39	cyan
ENSG00000013374	-0.917871	-0.795997	0.184782	-0.0781262	0.839311	0.898097	0.127902	-0.0403465	NUB1	greenyellow
ENSG00000013441	-0.143554	-0.692248	-0.208786	-0.859443	0.526481	0.10766	0.497601	0.843632	CLK1	black
ENSG00000013561	-0.839311	-0.571193	0.506598	0.0316177	0.571011	0.865813	-0.23458	-0.0781675	RNF14	greenyellow
ENSG00000013563	-0.668776	-0.725664	-0.073247	-0.210397	0.76621	0.611904	0.354662	0.104931	DNASE1L1	black
ENSG00000013573	0.63944	0.851651	0.383201	0.339512	-0.900689	-0.557576	-0.61034	-0.145554	DDX11	cyan
ENSG00000164258	-0.0794446	-0.668281	-0.864881	-0.632458	0.668698	-0.0309237	0.947507	0.443009	NDUFS4	darkgrey
ENSG00000013810	0.883034	0.869525	-0.201656	0.260009	-0.85902	-0.864173	-0.162729	-0.167022	TACC3	cyan
ENSG00000014123	-0.419	-0.851368	-0.47066	-0.627514	0.823214	0.344502	0.694432	0.457201	UFL1	black
ENSG00000014138	0.497662	0.812813	0.141737	0.579959	-0.742039	-0.463365	-0.430661	-0.475691	POLA2	cyan
ENSG00000014164	-0.872705	-0.453074	0.253371	0.392163	0.594223	0.865912	-0.120605	-0.517472	ZC3H3	greenyellow
ENSG00000014641	0.901803	0.862122	-0.171812	0.209388	-0.868859	-0.878703	-0.16379	-0.104939	MDH1	cyan
ENSG00000228474	-0.177041	-0.751802	-0.775429	-0.668033	0.746129	0.0635303	0.947075	0.486909	OST4	darkgrey
ENSG00000014919	0.723276	0.181865	-0.726251	-0.424326	-0.239614	-0.764598	0.525129	0.411534	COX15	blue
ENSG00000015171	-0.800257	-0.241977	0.452538	0.561709	0.387742	0.821744	-0.343097	-0.641711	ZMYND11	greenyellow
ENSG00000015475	0.0613429	0.39465	0.471815	0.362319	-0.380927	-0.0295752	-0.457269	-0.272389	BID	cyan
ENSG00000015479	0.405942	0.388728	0.190651	-0.00536532	-0.477849	-0.33186	-0.325078	0.126591	MATR3	blue
ENSG00000015676	-0.646279	-0.566276	-0.23011	0.0963227	0.689969	0.592848	0.326192	-0.255052	NUDCD3	black
ENSG00000054148	0.119474	-0.620935	-0.830322	-0.856181	0.538621	-0.221911	0.942947	0.741287	PHPT1	darkgrey
ENSG00000017260	0.175937	-0.459566	-0.457179	-0.8122	0.315992	-0.215063	0.593853	0.818703	ATP2C1	darkorange
ENSG00000017797	-0.913315	-0.761317	0.0336268	0.0322583	0.857514	0.875496	0.201935	-0.193886	RALBP1	greenyellow
ENSG00000018408	0.776612	0.828782	0.160265	0.192783	-0.880327	-0.731793	-0.370329	-0.0232601	WWTR1	cyan
ENSG00000019485	-0.958643	-0.585063	0.442944	0.221377	0.659492	0.968431	-0.185685	-0.304029	PRDM11	greenyellow
ENSG00000019995	-0.800706	-0.567576	0.309639	0.0853611	0.607821	0.809035	-0.0871066	-0.151641	ZRANB1	greenyellow
ENSG00000021355	0.422884	0.634607	0.658794	0.173617	-0.754624	-0.316656	-0.726089	0.0589229	SERPINB1	blue
ENSG00000021762	-0.264347	-0.459014	-0.587636	-0.123441	0.565699	0.172635	0.633148	-0.0546652	OSBPL5	black
ENSG00000022267	0.838052	0.322042	-0.393287	-0.503043	-0.464956	-0.837668	0.252659	0.595112	FHL1	blue
ENSG00000022567	0.0921749	0.512826	0.221651	0.630924	-0.389306	-0.0753435	-0.360527	-0.630704	SLC45A4	cyan
ENSG00000102699	-0.243548	0.241024	0.943305	0.352215	-0.292469	0.347076	-0.826068	-0.186206	PARP4	darkturquoise
ENSG00000023171	0.658034	0.88774	0.348962	0.386908	-0.918917	-0.589753	-0.577851	-0.200948	GRAMD1B	cyan
ENSG00000023228	0.163691	0.704133	0.413337	0.75271	-0.605165	-0.0985381	-0.659664	-0.679268	NDUFS1	cyan
ENSG00000023287	-0.867965	-0.771124	0.0947971	-0.0778007	0.821815	0.842006	0.162703	-0.062332	RB1CC1	greenyellow
ENSG00000111321	-0.479047	0.120612	0.942632	0.489713	-0.109678	0.563287	-0.794224	-0.384576	LTBR	darkturquoise
ENSG00000070669	-0.349592	0.112388	0.94209	0.288732	-0.167198	0.44707	-0.778654	-0.144246	ASNS	darkturquoise
ENSG00000023516	0.372968	-0.301467	-0.729909	-0.739309	0.205903	-0.440443	0.741197	0.651174	AKAP11	blue
ENSG00000023572	-0.894989	-0.660301	0.141742	0.12561	0.755261	0.863432	0.0780017	-0.253269	GLRX2	greenyellow
ENSG00000023608	0.850221	0.651826	0.0332566	-0.154782	-0.785978	-0.796515	-0.227129	0.331562	SNAPC1	blue
ENSG00000171346	-0.204779	-0.810048	-0.739411	-0.739272	0.780039	0.093964	0.941895	0.571804	KRT15	darkgrey
ENSG00000023734	-0.79683	-0.411721	0.0422041	0.446323	0.602398	0.757767	0.0507838	-0.62346	STRAP	greenyellow
ENSG00000023839	-0.760204	-0.949525	-0.291298	-0.364416	0.989296	0.680925	0.58165	0.178732	ABCC2	black
ENSG00000023892	0.285861	0.533284	-0.0323974	0.485778	-0.420033	-0.294429	-0.147502	-0.492605	DEF6	cyan
ENSG00000023902	-0.859237	-0.601189	0.533535	0.0121432	0.593753	0.884018	-0.220384	-0.0330979	PLEKHO1	greenyellow
ENSG00000023909	0.534494	0.854429	0.577908	0.412445	-0.906439	-0.439616	-0.748637	-0.197962	GCLM	cyan
ENSG00000024048	-0.794106	-0.848247	-0.212571	-0.179841	0.922774	0.735404	0.441267	-0.0188454	UBR2	black
ENSG00000024422	0.46592	-0.156422	-0.23186	-0.836667	-0.0673378	-0.466685	0.317217	0.931876	EHD2	darkorange
ENSG00000024526	0.796997	0.954391	0.182272	0.362982	-0.977227	-0.73736	-0.486246	-0.194779	DEPDC1	cyan
ENSG00000025039	0.0855484	-0.443546	-0.058841	-0.839174	0.224196	-0.0804576	0.265583	0.908728	RRAGD	darkorange
ENSG00000025772	0.354412	0.820189	0.722437	0.552468	-0.846501	-0.244771	-0.885109	-0.342647	TOMM34	cyan
ENSG00000025796	0.270135	-0.324068	-0.470877	-0.73422	0.184406	-0.296515	0.502828	0.741037	SEC63	darkorange
ENSG00000025800	-0.631289	-0.07481	0.287905	0.65583	0.261821	0.628505	-0.255691	-0.764917	KPNA6	greenyellow
ENSG00000026025	-0.46708	-0.814831	-0.416559	-0.504751	0.803664	0.406603	0.604593	0.368867	VIM	black
ENSG00000026297	0.849396	0.354349	-0.293127	-0.504773	-0.517018	-0.852287	0.197619	0.631768	RNASET2	blue
ENSG00000026508	0.184838	-0.311401	-0.0662071	-0.768607	0.102231	-0.172211	0.203606	0.852628	CD44	darkorange
ENSG00000028116	-0.89424	-0.600512	0.283933	0.163831	0.678663	0.895506	-0.0776461	-0.271003	VRK2	greenyellow
ENSG00000028137	0.511357	0.29905	-0.553827	0.00186294	-0.246755	-0.57664	0.382513	-0.0360031	TNFRSF1B	blue
ENSG00000028203	0.227583	-0.345714	-0.186951	-0.825431	0.143157	-0.244886	0.368119	0.870139	VEZT	darkorange
ENSG00000029534	0.630011	0.282604	-0.727419	-0.11959	-0.240741	-0.705115	0.526925	0.0643369	ANK1	blue
ENSG00000029639	0.667131	0.543007	0.273646	-0.174534	-0.707368	-0.600631	-0.360309	0.384581	TFB1M	blue
ENSG00000029993	0.678451	0.948108	0.297709	0.476544	-0.949434	-0.603595	-0.592788	-0.31471	HMGB3	cyan
ENSG00000030110	-0.768106	-0.194563	0.339131	0.63661	0.379638	0.773674	-0.278617	-0.732608	BAK1	greenyellow
ENSG00000030582	-0.155864	-0.779582	-0.420526	-0.896386	0.636039	0.0949855	0.672827	0.836412	GRN	black
ENSG00000031003	-0.236619	-0.518925	0.186491	-0.603232	0.355481	0.260245	0.0773408	0.651485	FAM13B	black
ENSG00000031691	0.900093	0.880581	-0.0593294	0.196904	-0.911304	-0.856835	-0.260999	-0.0619401	CENPQ	blue
ENSG00000031698	-0.962423	-0.630571	0.50079	0.12124	0.669839	0.978644	-0.206645	-0.18257	SARS	greenyellow
ENSG00000032219	-0.628436	-0.584628	-0.0169433	-0.0571719	0.639772	0.571322	0.25192	-0.0508171	ARID4A	black
ENSG00000162576	-0.0202121	-0.730626	-0.773672	-0.862926	0.65249	-0.0800884	0.940455	0.726715	MXRA8	darkgrey
ENSG00000033050	-0.654643	0.0828972	0.802815	0.740711	0.0324114	0.724652	-0.734952	-0.712613	ABCF2	greenyellow
ENSG00000033100	-0.727339	-0.755563	-0.226551	-0.114715	0.851349	0.654483	0.460399	-0.0777654	CHPF2	black
ENSG00000033178	0.515156	0.780421	0.472711	0.360391	-0.824493	-0.433624	-0.637207	-0.163793	UBA6	cyan
ENSG00000033327	-0.949531	-0.78776	0.260821	-0.054832	0.824172	0.935879	0.0515209	-0.0560005	GAB2	greenyellow
ENSG00000033867	0.836681	0.557744	-0.0103044	-0.268957	-0.705391	-0.802154	-0.107328	0.437473	SLC4A7	blue
ENSG00000034152	0.438317	0.661882	-0.0525303	0.497647	-0.557989	-0.440504	-0.173508	-0.451764	MAP2K3	cyan
ENSG00000034510	0.884776	0.645871	0.00317842	-0.198999	-0.785967	-0.846694	-0.161355	0.381507	TMSB10	blue
ENSG00000034693	0.938384	0.667607	-0.187625	-0.154917	-0.777941	-0.905383	-0.0735205	0.302675	PEX3	blue
ENSG00000034713	-0.283977	-0.67916	-0.760124	-0.394143	0.749516	0.174452	0.862868	0.187606	GABARAPL2	black
ENSG00000035115	-0.336999	-0.665655	0.0474723	-0.650334	0.514267	0.338073	0.2052	0.651934	SH3YL1	black
ENSG00000035141	0.54414	0.945158	0.493653	0.58183	-0.944489	-0.454344	-0.755953	-0.404437	FAM136A	cyan
ENSG00000035403	0.931705	0.8135	-0.246496	0.117662	-0.831368	-0.922616	-0.0664693	-0.0140179	VCL	blue
ENSG00000035499	0.87435	0.928554	0.0551851	0.265608	-0.964432	-0.819639	-0.380298	-0.108614	DEPDC1B	cyan
ENSG00000035687	-0.703276	-0.849783	-0.333343	-0.258041	0.916332	0.627243	0.558892	0.0664092	ADSS	black
ENSG00000215105	0.134771	-0.599448	-0.824663	-0.848401	0.522333	-0.234896	0.940409	0.715298	TTC3P1	darkgrey
ENSG00000035928	0.789175	0.692167	-0.155711	0.0721899	-0.736793	-0.761085	-0.152659	0.0418352	RFC1	blue
ENSG00000036054	-0.831485	-0.817047	0.036204	-0.19414	0.846229	0.783995	0.258933	0.0444434	TBC1D23	greenyellow
ENSG00000036549	-0.564485	-0.837546	-0.357185	-0.442725	0.852093	0.485035	0.60405	0.265728	ZZZ3	black
ENSG00000037474	0.572702	0.924852	0.313851	0.582962	-0.886528	-0.506965	-0.591231	-0.454074	NSUN2	cyan
ENSG00000103257	-0.437533	0.253196	0.939729	0.650114	-0.215749	0.534946	-0.894946	-0.549675	SLC7A5	darkturquoise
ENSG00000037757	0.862601	0.484906	-0.607436	-0.173918	-0.508876	-0.89125	0.332144	0.198335	MRI1	blue
ENSG00000038210	0.516446	0.0408707	-0.758218	-0.362111	-0.0449994	-0.592005	0.634434	0.281402	PI4K2B	blue
ENSG00000038274	-0.526638	-0.739352	-0.509003	-0.257389	0.821638	0.432537	0.663381	0.0459491	MAT2B	black
ENSG00000038382	-0.758016	-0.854727	-0.0787919	-0.29918	0.872365	0.705179	0.384434	0.148803	TRIO	black
ENSG00000039123	0.664162	0.744038	-0.170149	0.360879	-0.687316	-0.647357	-0.149259	-0.308058	SKIV2L2	blue
ENSG00000040199	-0.813478	-0.305696	0.293233	0.538672	0.472996	0.815258	-0.20752	-0.655246	PHLPP2	greenyellow
ENSG00000040275	0.644572	0.884171	0.315655	0.410051	-0.903008	-0.571353	-0.574215	-0.242999	SPDL1	cyan
ENSG00000040487	-0.959714	-0.563643	0.456931	0.249486	0.64541	0.965624	-0.197081	-0.326594	PQLC2	greenyellow
ENSG00000040608	-0.912457	-0.750936	0.0669047	0.0381913	0.841337	0.883247	0.164098	-0.180636	RTN4R	greenyellow
ENSG00000040933	-0.744212	-0.674904	-0.211185	0.0434252	0.795876	0.690951	0.350765	-0.237609	INPP4A	black
ENSG00000041353	-0.670319	-0.460287	0.611342	-0.0698065	0.410958	0.706117	-0.287193	0.0866196	RAB27B	greenyellow
ENSG00000041357	0.632526	0.934319	0.152213	0.578305	-0.879314	-0.58681	-0.476399	-0.464733	PSMA4	cyan
ENSG00000041802	-0.723162	-0.105317	0.463771	0.677614	0.273661	0.745763	-0.393408	-0.734299	LSG1	greenyellow
ENSG00000065548	-0.352868	0.246289	0.939686	0.52103	-0.243577	0.451673	-0.854626	-0.397531	ZC3H15	darkturquoise
ENSG00000042445	0.279163	-0.444676	-0.574061	-0.902977	0.285334	-0.329834	0.670802	0.879453	RETSAT	darkorange
ENSG00000042493	-0.870078	-0.936777	-0.0239248	-0.296164	0.95514	0.821615	0.35603	0.155647	CAPG	black
ENSG00000042753	0.641097	0.725005	-0.160979	0.3667	-0.674122	-0.631089	-0.146755	-0.325629	AP2S1	blue
ENSG00000043039	0.739067	0.410482	-0.712711	-0.0727465	-0.373034	-0.795208	0.442981	0.0362921	BARX2	blue
ENSG00000043514	0.668257	0.705817	0.308288	0.0732629	-0.806761	-0.599959	-0.458118	0.111119	TRIT1	blue
ENSG00000135373	0.304062	-0.388791	-0.913384	-0.691782	0.349892	-0.409968	0.940056	0.574562	EHF	darkgrey
ENSG00000044115	-0.700313	-0.433074	0.569556	0.038252	0.402605	0.746183	-0.351419	-0.0329169	CTNNA1	greenyellow
ENSG00000124098	0.319687	-0.430976	-0.893331	-0.802138	0.358789	-0.422291	0.938688	0.696495	FAM210B	darkgrey
ENSG00000044574	-0.829043	-0.78058	0.307862	-0.238519	0.757954	0.81414	0.0792723	0.173505	HSPA5	greenyellow
ENSG00000046604	0.20869	0.010834	0.163088	-0.346874	-0.166995	-0.178065	-0.110878	0.478243	DSG2	blue
ENSG00000046651	0.123827	-0.315015	-0.0782041	-0.687615	0.144201	-0.138424	0.254478	0.712252	OFD1	darkorange
ENSG00000047056	-0.840015	-0.694689	0.0122103	0.0506239	0.794659	0.807182	0.203047	-0.216919	WDR37	greenyellow
ENSG00000047346	-0.26691	-0.748449	-0.50682	-0.644404	0.696891	0.202352	0.67977	0.528116	FAM214A	black
ENSG00000047644	-0.89585	-0.529692	0.260421	0.298358	0.647451	0.884576	-0.081078	-0.408946	WWC3	greenyellow
ENSG00000047849	-0.5728	-0.801517	-0.468674	-0.31178	0.865685	0.493496	0.637461	0.101057	MAP4	black
ENSG00000048028	0.853304	0.585213	-0.0597894	-0.224384	-0.714379	-0.819751	-0.0864118	0.371589	USP28	blue
ENSG00000048052	-0.64599	-0.890796	-0.0450238	-0.539884	0.837255	0.59626	0.423718	0.442193	HDAC9	black
ENSG00000048140	-0.915481	-0.425331	0.455224	0.417674	0.543333	0.936136	-0.280067	-0.509031	TSPAN17	greenyellow
ENSG00000048162	-0.488534	0.192182	0.437734	0.84449	-0.00556757	0.517896	-0.496988	-0.889619	NOP16	greenyellow
ENSG00000048471	-0.784812	-0.765397	-0.0752325	-0.117856	0.833172	0.734897	0.31476	-0.0517449	SNX29	black
ENSG00000048544	-0.484745	-0.582421	-0.516735	-0.0509874	0.721724	0.391138	0.612603	-0.170512	MRPS10	black
ENSG00000048828	-0.497419	-0.693288	-0.496807	-0.228935	0.779644	0.40282	0.651968	0.00716332	FAM120A	black
ENSG00000049239	-0.0245	-0.462059	0.0691849	-0.771081	0.257052	0.0376869	0.184483	0.835684	H6PD	darkorange
ENSG00000049249	-0.875601	-0.824085	0.18571	-0.195248	0.838786	0.843834	0.17431	0.0844951	TNFRSF9	greenyellow
ENSG00000049449	0.250349	-0.0144209	0.160323	-0.442068	-0.158167	-0.219514	-0.0568409	0.566531	RCN1	blue
ENSG00000049541	0.637018	0.943454	0.355591	0.499608	-0.949557	-0.553262	-0.658241	-0.33334	RFC2	cyan
ENSG00000049656	0.201422	0.679325	0.325171	0.711398	-0.574103	-0.15917	-0.531679	-0.640114	CLPTM1L	cyan
ENSG00000049759	0.114842	-0.476847	-0.453018	-0.758728	0.348966	-0.15424	0.583282	0.750866	NEDD4L	darkorange
ENSG00000049883	0.188424	0.612163	0.338433	0.594279	-0.557537	-0.122898	-0.595609	-0.517556	PTCD2	cyan
ENSG00000050130	0.63733	0.278074	-0.683459	-0.14247	-0.259141	-0.687252	0.467353	0.114659	JKAMP	blue
ENSG00000050344	0.818846	0.812621	-0.0982311	0.218953	-0.819316	-0.800045	-0.18723	-0.113729	NFE2L3	blue
ENSG00000050405	-0.506597	-0.765013	-0.624303	-0.279749	0.861014	0.400834	0.765325	0.0493013	LIMA1	black
ENSG00000050426	-0.237394	-0.743663	-0.318752	-0.772324	0.624093	0.187754	0.560197	0.682081	LETMD1	black
ENSG00000050820	-0.87355	-0.56344	0.550657	0.0923535	0.579269	0.895319	-0.236016	-0.119532	BCAR1	greenyellow
ENSG00000051009	0.495102	-0.142202	-0.426247	-0.751301	-0.0312451	-0.522346	0.473927	0.8042	FAM160A2	darkorange
ENSG00000051108	-0.820757	-0.928116	0.0209041	-0.373948	0.917544	0.776586	0.345043	0.250082	HERPUD1	black
ENSG00000051128	-0.93084	-0.752049	0.127729	0.0354284	0.838956	0.897396	0.15323	-0.172763	HOMER3	greenyellow
ENSG00000051180	0.663848	0.910032	0.400339	0.394563	-0.948544	-0.576928	-0.64276	-0.200108	RAD51	cyan
ENSG00000051341	0.757996	0.896026	-0.02309	0.415882	-0.865052	-0.71437	-0.335798	-0.307295	POLQ	cyan
ENSG00000051523	0.801768	0.350076	-0.575948	-0.314421	-0.406628	-0.838561	0.395327	0.35127	CYBA	blue
ENSG00000051596	0.850105	0.863902	-0.0280916	0.224938	-0.889248	-0.812128	-0.278506	-0.0927192	THOC3	blue
ENSG00000051620	-0.668911	-0.923358	-0.354054	-0.424757	0.950354	0.59041	0.624711	0.238001	HEBP2	black
ENSG00000052749	-0.947055	-0.57213	0.296393	0.28181	0.691761	0.937117	-0.0783629	-0.408327	RRP12	greenyellow
ENSG00000052841	-0.282291	-0.727481	-0.21079	-0.725976	0.603321	0.243657	0.460699	0.679617	TTC17	black
ENSG00000068078	-0.174755	-0.705181	-0.834708	-0.567561	0.728665	0.0596539	0.936717	0.369121	FGFR3	darkgrey
ENSG00000053371	0.916845	0.418784	-0.517721	-0.399948	-0.525695	-0.938005	0.322946	0.467456	AKR7A2	blue
ENSG00000053372	0.190801	0.796756	0.688745	0.762645	-0.75024	-0.0970334	-0.882092	-0.619536	MRTO4	cyan
ENSG00000053524	-0.804042	-0.782209	0.0691448	-0.17868	0.806091	0.780985	0.207135	0.0397646	MCF2L2	black
ENSG00000013588	0.207155	-0.533357	-0.889734	-0.810289	0.462691	-0.301229	0.936428	0.690553	GPRC5A	darkgrey
ENSG00000054523	-0.635365	-0.724666	-0.325913	-0.165198	0.816538	0.554087	0.522228	-0.0357722	KIF1B	black
ENSG00000054598	-0.851708	-0.507499	0.206089	0.305213	0.643437	0.836341	-0.00838447	-0.425635	FOXC1	greenyellow
ENSG00000054654	-0.781192	-0.691656	-0.158979	0.0468523	0.817165	0.723379	0.348751	-0.247109	SYNE2	black
ENSG00000054793	-0.823523	-0.939749	-0.0710614	-0.352531	0.94231	0.778457	0.375414	0.206186	ATP9A	black
ENSG00000054965	0.568483	-0.155521	-0.811091	-0.727292	0.0567309	-0.646282	0.775799	0.701185	FAM168A	blue
ENSG00000054967	0.848448	0.789393	0.0897968	0.0628866	-0.876135	-0.797412	-0.31104	0.119466	RELT	blue
ENSG00000054983	0.647424	0.0977916	-0.725079	-0.475362	-0.155248	-0.702685	0.566479	0.443246	GALC	blue
ENSG00000055044	0.30574	0.833103	0.591061	0.703274	-0.792717	-0.224265	-0.792457	-0.534034	NOP58	cyan
ENSG00000055070	0.406515	0.78403	0.593443	0.45893	-0.822905	-0.307473	-0.787042	-0.273185	SZRD1	cyan
ENSG00000055118	-0.930132	-0.656096	0.313779	0.109866	0.723554	0.920982	-0.0465804	-0.213749	KCNH2	greenyellow
ENSG00000055130	0.0741743	0.65214	0.495575	0.771929	-0.561717	-0.00035823	-0.719401	-0.678804	CUL1	midnightblue
ENSG00000055208	-0.671218	-0.860394	-0.00425788	-0.463292	0.815281	0.641623	0.328867	0.369089	TAB2	black
ENSG00000055211	0.304283	-0.255036	-0.494504	-0.669718	0.132526	-0.338887	0.495319	0.64274	GINM1	darkorange
ENSG00000055483	-0.836946	-0.443561	0.641587	0.194301	0.467585	0.87305	-0.362153	-0.218889	USP36	greenyellow
ENSG00000055609	-0.820806	-0.813208	-0.132262	-0.122262	0.891586	0.761922	0.376781	-0.0649181	KMT2C	greenyellow
ENSG00000055917	-0.678852	-0.537165	-0.0762562	0.108325	0.661931	0.627095	0.247398	-0.282283	PUM2	black
ENSG00000055950	-0.352027	-0.409827	-0.457052	0.018695	0.527584	0.276925	0.454282	-0.207482	MRPL43	black
ENSG00000056097	-0.789199	-0.212841	0.822194	0.430624	0.255405	0.856623	-0.628322	-0.406837	ZFR	greenyellow
ENSG00000056277	-0.434154	0.268748	0.748726	0.750374	-0.164162	0.503867	-0.744287	-0.702313	ZNF280C	greenyellow
ENSG00000056558	-0.807034	-0.414367	0.653115	0.194093	0.438945	0.83255	-0.347058	-0.200552	TRAF1	greenyellow
ENSG00000056586	-0.863427	-0.5608	0.169692	0.236557	0.678461	0.84574	0.00396536	-0.372472	RC3H2	greenyellow
ENSG00000057608	-0.540625	-0.0524039	0.579252	0.433783	0.10594	0.609623	-0.546683	-0.43292	GDI2	greenyellow
ENSG00000057757	0.362122	0.500799	0.283953	0.194422	-0.558831	-0.284139	-0.469351	-0.0776896	PITHD1	cyan
ENSG00000058063	-0.405122	-0.569563	0.167749	-0.438384	0.458059	0.42099	0.0687979	0.420751	ATP11B	black
ENSG00000058085	-0.537558	-0.242816	0.588343	0.125863	0.214242	0.584979	-0.406787	-0.0804828	LAMC2	greenyellow
ENSG00000058262	-0.88668	-0.796961	0.0454521	-0.0756001	0.865968	0.844424	0.233641	-0.0715273	SEC61A1	greenyellow
ENSG00000058600	-0.717096	-0.412005	0.10405	0.304554	0.554684	0.678416	0.0595373	-0.44189	POLR3E	greenyellow
ENSG00000058668	-0.719858	-0.984599	-0.298329	-0.477592	0.991844	0.646746	0.603757	0.303267	ATP2B4	black
ENSG00000058729	-0.829889	-0.509758	0.308853	0.213166	0.582021	0.836697	-0.147655	-0.301541	RIOK2	greenyellow
ENSG00000058804	0.817105	0.938743	0.00300981	0.392122	-0.921867	-0.771433	-0.348265	-0.261593	NDC1	cyan
ENSG00000059122	-0.902147	-0.817156	0.141171	-0.11948	0.858964	0.864913	0.190631	0.00451231	FLYWCH1	greenyellow
ENSG00000059378	-0.921645	-0.651374	0.373269	0.0820911	0.701835	0.915647	-0.0723434	-0.17869	PARP12	greenyellow
ENSG00000059573	0.905786	0.422451	-0.576007	-0.362961	-0.501398	-0.938796	0.364016	0.42025	ALDH18A1	blue
ENSG00000059728	-0.766631	-0.796895	0.215227	-0.311893	0.763013	0.743918	0.162342	0.254366	MXD1	greenyellow
ENSG00000059769	0.479347	0.477282	0.445867	-0.0859241	-0.632057	-0.390845	-0.502667	0.292129	DNAJC25	blue
ENSG00000059804	0.942224	0.722225	-0.0632825	-0.127512	-0.842116	-0.899645	-0.174027	0.295367	SLC2A3	blue
ENSG00000060138	0.155816	-0.423185	-0.173621	-0.854848	0.21747	-0.16614	0.363015	0.906931	YBX3	darkorange
ENSG00000060237	-0.932591	-0.713177	0.098706	0.116579	0.825041	0.897436	0.144048	-0.273735	WNK1	greenyellow
ENSG00000060491	0.657376	0.250393	-0.058396	-0.491402	-0.432812	-0.624825	0.0310035	0.643065	OGFR	blue
ENSG00000060558	0.336633	0.606686	-0.00679	0.542775	-0.513681	-0.323992	-0.27035	-0.490493	GNA15	cyan
ENSG00000060688	0.208582	0.693485	0.293731	0.729828	-0.57371	-0.176571	-0.500585	-0.666996	SNRNP40	cyan
ENSG00000060762	-0.844364	-0.6823	-0.0378925	0.0949485	0.805232	0.795316	0.248672	-0.281072	MPC1	greenyellow
ENSG00000061273	0.643231	0.817087	0.344226	0.293123	-0.872341	-0.564499	-0.566072	-0.101871	HDAC7	cyan
ENSG00000061656	0.861144	0.454372	-0.113586	-0.433855	-0.634132	-0.834368	0.00406439	0.596442	SPAG4	blue
ENSG00000061676	-0.906592	-0.766616	0.0444906	0.0033561	0.853395	0.87043	0.193912	-0.16893	NCKAP1	greenyellow
ENSG00000061938	-0.892578	-0.764571	0.157162	-0.0580439	0.816046	0.859219	0.132958	-0.0567906	TNK2	greenyellow
ENSG00000062194	-0.560592	-0.267574	0.624021	0.0918427	0.233235	0.629463	-0.44966	-0.0513896	GPBP1	greenyellow
ENSG00000062485	-0.566311	-0.190723	-0.0539918	0.52207	0.396174	0.532975	0.0356539	-0.675959	CS	greenyellow
ENSG00000062582	-0.419136	-0.445944	-0.451714	0.0752026	0.588127	0.339796	0.500058	-0.253017	MRPS24	black
ENSG00000062598	-0.865884	-0.393109	0.413242	0.405333	0.512941	0.868258	-0.248024	-0.507155	ELMO2	greenyellow
ENSG00000062650	-0.848899	-0.369347	0.535143	0.38134	0.460947	0.866506	-0.318133	-0.437912	WAPAL	greenyellow
ENSG00000062822	0.888438	0.7472	-0.204083	0.0499037	-0.785745	-0.88178	-0.0612396	0.0563714	POLD1	blue
ENSG00000063046	-0.719046	-0.841036	0.0541704	-0.386474	0.802128	0.700544	0.248229	0.303338	EIF4B	black
ENSG00000063177	-0.907411	-0.800505	0.000225935	-0.0285398	0.891793	0.852654	0.277459	-0.137255	RPL18	greenyellow
ENSG00000063180	0.715945	0.0507302	-0.569231	-0.705746	-0.201962	-0.759717	0.526437	0.748598	CA11	blue
ENSG00000063241	-0.361358	-0.183316	-0.317983	0.351428	0.381946	0.287893	0.311428	-0.529728	ISOC2	black
ENSG00000063438	-0.87354	-0.649116	0.399343	0.00473613	0.67013	0.88532	-0.110214	-0.0686444	AHRR	greenyellow
ENSG00000063587	0.407338	0.659371	0.5691	0.268839	-0.73361	-0.323809	-0.659151	-0.0957715	ZNF275	cyan
ENSG00000063601	0.862197	0.772099	-0.226955	0.136223	-0.792684	-0.847041	-0.110915	-0.0386337	MTMR1	blue
ENSG00000063660	-0.775751	-0.945235	-0.29067	-0.335273	0.992496	0.700484	0.563495	0.144303	GPC1	black
ENSG00000063761	-0.382661	0.0844547	0.159992	0.635912	0.0901295	0.377358	-0.207341	-0.709149	ADCK1	greenyellow
ENSG00000063854	0.796859	0.707206	0.175081	-0.0393053	-0.834248	-0.737909	-0.348211	0.240226	HAGH	blue
ENSG00000064012	0.873773	0.688819	-0.0123999	-0.101941	-0.807092	-0.819574	-0.21697	0.270662	CASP8	blue
ENSG00000064102	0.926828	0.540232	-0.224354	-0.341362	-0.677674	-0.914761	0.0678077	0.475097	ASUN	blue
ENSG00000064199	0.680226	0.794927	-0.0840862	0.380402	-0.751043	-0.658242	-0.237116	-0.307174	SPA17	cyan
ENSG00000064300	-0.868503	-0.557992	0.573599	0.0771029	0.558566	0.908806	-0.302111	-0.101953	NGFR	greenyellow
ENSG00000064309	-0.521691	-0.85474	-0.509422	-0.457911	0.883904	0.433086	0.718488	0.261167	CDON	black
ENSG00000064393	-0.719744	-0.830918	-0.301659	-0.227528	0.902016	0.643149	0.514284	0.0230709	HIPK2	black
ENSG00000064419	-0.872178	-0.338916	0.54276	0.460511	0.44231	0.906606	-0.399676	-0.519543	TNPO3	greenyellow
ENSG00000064601	-0.443312	-0.928481	-0.559134	-0.672906	0.904618	0.349487	0.814841	0.493558	CTSA	black
ENSG00000064607	0.769508	0.539219	-0.410569	-0.0335104	-0.542442	-0.795532	0.190708	0.0912382	SUGP2	blue
ENSG00000064666	0.886934	0.866122	-0.148326	0.229942	-0.873724	-0.858494	-0.196678	-0.116616	CNN2	blue
ENSG00000141574	0.292149	-0.336515	-0.966969	-0.574713	0.338043	-0.404319	0.93396	0.431951	SECTM1	darkgrey
ENSG00000064886	-0.345724	-0.833292	-0.441784	-0.709899	0.772427	0.262609	0.714765	0.582836	CHI3L2	black
ENSG00000068903	-0.0637728	-0.683006	-0.818435	-0.699556	0.657616	-0.0441247	0.932524	0.548134	SIRT2	darkgrey
ENSG00000064995	0.973044	0.635491	-0.347597	-0.188861	-0.721461	-0.965468	0.091467	0.306813	TAF11	blue
ENSG00000064999	-0.667987	-0.23506	0.190687	0.480183	0.390423	0.674247	-0.167645	-0.597626	ANKS1A	greenyellow
ENSG00000065000	-0.854918	-0.581158	0.318007	0.14178	0.642536	0.866716	-0.0923721	-0.237909	AP3D1	greenyellow
ENSG00000065057	0.440026	0.549932	-0.16766	0.371446	-0.460309	-0.45367	-0.0283525	-0.330172	NTHL1	blue
ENSG00000065060	-0.94574	-0.50979	0.40162	0.334625	0.621394	0.950826	-0.200682	-0.446446	UHRF1BP1	greenyellow
ENSG00000065135	0.779037	0.904211	0.222555	0.285208	-0.953406	-0.703656	-0.516595	-0.107008	GNAI3	cyan
ENSG00000128564	-0.247343	0.303072	0.939146	0.466773	-0.321025	0.343953	-0.841069	-0.309708	VGF	darkturquoise
ENSG00000239779	0.145909	-0.575884	-0.835381	-0.819698	0.503454	-0.24719	0.930679	0.696821	WBP1	darkgrey
ENSG00000065183	0.533261	0.921048	0.345898	0.623051	-0.874099	-0.461828	-0.624073	-0.481893	WDR3	cyan
ENSG00000065268	0.513338	0.781908	0.161273	0.505107	-0.740236	-0.46717	-0.433613	-0.387532	WDR18	cyan
ENSG00000196154	0.065326	-0.600558	-0.785486	-0.760928	0.548442	-0.176164	0.930444	0.631736	S100A4	darkgrey
ENSG00000065320	-0.518088	-0.659245	-0.499563	-0.13921	0.774101	0.431195	0.624988	-0.0844394	NTN1	black
ENSG00000065328	0.788581	0.96031	0.137221	0.403778	-0.963487	-0.728792	-0.470562	-0.24962	MCM10	cyan
ENSG00000065357	-0.711829	-0.856121	-0.227552	-0.307049	0.894229	0.642247	0.495463	0.132579	DGKA	black
ENSG00000065427	-0.0925444	0.573611	0.620124	0.829171	-0.47037	0.175763	-0.784898	-0.744856	KARS	midnightblue
ENSG00000065491	-0.935391	-0.507117	0.420843	0.323661	0.612209	0.942784	-0.203115	-0.423917	TBC1D22B	greenyellow
ENSG00000065518	0.668829	0.0240312	-0.771061	-0.606118	-0.109761	-0.732432	0.648387	0.574794	NDUFB4	blue
ENSG00000141378	-0.474253	0.161833	0.937722	0.554891	-0.139826	0.562517	-0.830091	-0.446067	PTRH2	darkturquoise
ENSG00000065613	-0.845271	-0.927542	-0.0558365	-0.30775	0.94857	0.797395	0.375613	0.150644	SLK	black
ENSG00000140264	-0.226145	-0.764508	-0.751061	-0.627728	0.76979	0.110352	0.929954	0.444908	SERF2	darkgrey
ENSG00000065717	0.737329	0.0211401	-0.779029	-0.695373	-0.135202	-0.798734	0.680514	0.694872	TLE2	blue
ENSG00000172780	-0.391138	0.128565	0.937491	0.370618	-0.160672	0.480438	-0.794621	-0.246021	RAB43	darkturquoise
ENSG00000065833	-0.969776	-0.714197	0.289406	0.0807479	0.782512	0.961789	-0.0175583	-0.200143	ME1	greenyellow
ENSG00000065883	-0.773048	-0.408849	0.490167	0.228901	0.446857	0.812819	-0.320637	-0.266736	CDK13	greenyellow
ENSG00000187840	-0.214439	0.234746	0.937328	0.307667	-0.300478	0.315321	-0.809575	-0.130909	EIF4EBP1	darkturquoise
ENSG00000065970	-0.889298	-0.812037	-0.0310332	-0.0634284	0.890564	0.846049	0.273143	-0.112547	FOXJ2	greenyellow
ENSG00000065978	0.692087	0.931377	0.374299	0.396607	-0.968238	-0.608949	-0.632477	-0.204551	YBX1	cyan
ENSG00000065989	0.849485	0.607169	-0.433819	-0.0343473	-0.63193	-0.857415	0.115042	0.0874398	PDE4A	blue
ENSG00000090097	-0.00896599	-0.568106	-0.866533	-0.560068	0.584076	-0.105516	0.92921	0.385678	PCBP4	darkgrey
ENSG00000066044	0.546083	0.948938	0.285145	0.67604	-0.889205	-0.483899	-0.61581	-0.540499	ELAVL1	cyan
ENSG00000066084	-0.862617	-0.521321	0.254556	0.265785	0.630691	0.859251	-0.0757368	-0.392272	DIP2B	greenyellow
ENSG00000066117	-0.32619	0.330911	0.430079	0.846191	-0.160193	0.350399	-0.516578	-0.861489	SMARCD1	midnightblue
ENSG00000066230	-0.617259	-0.884677	0.000649537	-0.58547	0.799455	0.576508	0.373239	0.507159	SLC9A3	black
ENSG00000066248	-0.70109	-0.966373	-0.192265	-0.522688	0.938648	0.641578	0.514001	0.37972	NGEF	black
ENSG00000066279	0.791357	0.975508	0.0863416	0.450813	-0.958651	-0.741091	-0.433865	-0.314985	ASPM	cyan
ENSG00000066322	-0.944232	-0.603785	0.44756	0.164859	0.66301	0.951946	-0.169496	-0.231112	ELOVL1	greenyellow
ENSG00000066427	-0.474643	-0.432279	0.532737	-0.268039	0.317306	0.520837	-0.244284	0.322029	ATXN3	greenyellow
ENSG00000066455	-0.773324	-0.915401	-0.0894985	-0.37759	0.92138	0.71813	0.427071	0.227995	GOLGA5	black
ENSG00000066557	0.854795	0.406727	-0.628525	-0.290971	-0.460268	-0.891282	0.370648	0.311075	LRRC40	blue
ENSG00000066629	-0.466483	-0.72412	-0.504799	-0.325825	0.776113	0.38341	0.630518	0.156842	EML1	black
ENSG00000066697	-0.428197	-0.515106	0.47093	-0.4428	0.363828	0.463007	-0.130765	0.510229	MSANTD3	greenyellow
ENSG00000066735	0.427409	0.858443	0.527514	0.591724	-0.855948	-0.330576	-0.786702	-0.409016	KIF26A	cyan
ENSG00000066855	-0.670408	-0.355393	0.170114	0.318342	0.469742	0.673079	-0.0769208	-0.402962	MTFR1	greenyellow
ENSG00000066923	-0.454679	-0.748391	-0.582168	-0.343572	0.821392	0.349922	0.765112	0.135744	STAG3	black
ENSG00000067057	0.872324	0.557486	-0.0254363	-0.318397	-0.723528	-0.833436	-0.110373	0.493312	PFKP	blue
ENSG00000067064	-0.463258	0.123715	0.751204	0.563613	-0.0759544	0.54823	-0.72097	-0.497421	IDI1	greenyellow
ENSG00000067082	-0.910896	-0.89148	0.157136	-0.242765	0.895562	0.884296	0.19218	0.127351	KLF6	greenyellow
ENSG00000067113	-0.500822	-0.801845	-0.537165	-0.399001	0.84741	0.416429	0.688809	0.18356	PPAP2A	black
ENSG00000067177	0.21854	-0.218517	-0.215056	-0.591431	0.0804833	-0.224771	0.278648	0.637452	PHKA1	darkorange
ENSG00000067182	0.647174	0.799718	-0.0620498	0.426947	-0.740528	-0.620539	-0.253298	-0.358888	TNFRSF1A	cyan
ENSG00000067225	0.8802	0.911664	0.11225	0.204533	-0.971211	-0.821183	-0.401629	-0.0268892	PKM	cyan
ENSG00000067248	-0.0474812	0.382692	0.0164785	0.689629	-0.204861	0.0569495	-0.251795	-0.756759	DHX29	midnightblue
ENSG00000067334	-0.890249	-0.291586	0.631296	0.530374	0.40521	0.926106	-0.462466	-0.57646	DNTTIP2	greenyellow
ENSG00000067560	-0.904945	-0.909477	0.0184424	-0.220139	0.942634	0.86548	0.29257	0.0742316	RHOA	black
ENSG00000067606	-0.593592	-0.790819	-0.351346	-0.298495	0.831238	0.532222	0.532912	0.14238	PRKCZ	black
ENSG00000067704	0.927873	0.518764	-0.362296	-0.318809	-0.635969	-0.916834	0.127811	0.431409	IARS2	blue
ENSG00000067836	-0.430593	-0.757814	-0.55762	-0.395787	0.801877	0.336663	0.729528	0.217657	ROGDI	black
ENSG00000067840	0.828186	0.294108	-0.309291	-0.573505	-0.46861	-0.827589	0.224341	0.700662	PDZD4	blue
ENSG00000067955	0.080992	0.689183	0.728117	0.723525	-0.645759	0.0167612	-0.876986	-0.570267	CBFB	cyan
ENSG00000067992	0.913474	0.646226	-0.0544691	-0.216541	-0.788505	-0.870147	-0.150096	0.393733	PDK3	blue
ENSG00000068028	-0.524647	-0.693815	0.239599	-0.509036	0.566057	0.536378	0.0629267	0.519515	RASSF1	black
ENSG00000181588	-0.09919	-0.663567	-0.830793	-0.609103	0.669945	-0.00956493	0.929172	0.427334	MEX3D	darkgrey
ENSG00000068079	0.51617	-0.154835	-0.562254	-0.768702	0.0139405	-0.568749	0.603371	0.761308	IFI35	darkorange
ENSG00000167964	-0.129617	-0.726881	-0.769275	-0.703939	0.705905	0.017733	0.929143	0.538954	RAB26	darkgrey
ENSG00000068305	-0.108206	-0.545067	0.00576981	-0.75945	0.361297	0.113252	0.243487	0.787955	MEF2A	darkorange
ENSG00000068308	-0.645763	-0.797016	0.141397	-0.464675	0.717497	0.632942	0.194161	0.399773	OTUD5	black
ENSG00000068323	-0.970811	-0.733559	0.348099	0.0322736	0.780986	0.963567	-0.0270033	-0.12441	TFE3	greenyellow
ENSG00000068354	-0.845022	-0.841556	0.0137399	-0.190379	0.873681	0.799036	0.281725	0.055309	TBC1D25	greenyellow
ENSG00000068366	-0.866393	-0.448262	0.313821	0.373533	0.581014	0.859765	-0.128483	-0.477961	ACSL4	greenyellow
ENSG00000068394	-0.792698	-0.150067	0.636699	0.625298	0.273285	0.838153	-0.534621	-0.66077	GPKOW	greenyellow
ENSG00000113328	-0.0270665	-0.56615	-0.894248	-0.522394	0.596687	-0.0856746	0.92882	0.329214	CCNG1	darkgrey
ENSG00000068489	0.760943	0.899638	0.073936	0.370695	-0.898003	-0.710172	-0.402379	-0.233401	PRR11	cyan
ENSG00000068745	0.635656	0.2491	-0.0215345	-0.484531	-0.4413	-0.593921	-0.0314678	0.649338	IP6K2	blue
ENSG00000068784	0.406808	0.696294	0.483678	0.358463	-0.735287	-0.31516	-0.656089	-0.207181	SRBD1	cyan
ENSG00000068878	-0.773048	-0.168461	0.446265	0.648651	0.33086	0.794707	-0.378715	-0.720861	PSME4	greenyellow
ENSG00000100100	-0.0287965	-0.686631	-0.798715	-0.767746	0.640093	-0.0714585	0.928157	0.622324	PIK3IP1	darkgrey
ENSG00000068912	-0.676019	-0.731881	-0.353749	-0.0986705	0.848814	0.587667	0.537495	-0.105021	ERLEC1	black
ENSG00000068971	-0.0678153	-0.613728	-0.277187	-0.817887	0.460043	0.0259433	0.497172	0.786541	PPP2R5B	darkorange
ENSG00000069011	-0.548155	-0.334278	-0.294211	0.360037	0.534061	0.482506	0.282159	-0.563517	PITX1	greenyellow
ENSG00000069275	0.730005	0.772139	-0.0896756	0.272906	-0.761882	-0.70297	-0.203167	-0.19758	NUCKS1	blue
ENSG00000069329	-0.66215	-0.748181	0.169417	-0.373281	0.687039	0.660334	0.118827	0.301101	VPS35	black
ENSG00000069345	-0.777857	-0.209625	0.708097	0.464463	0.287477	0.82462	-0.520977	-0.474827	DNAJA2	greenyellow
ENSG00000069482	0.218726	0.801189	0.480382	0.825191	-0.695955	-0.154996	-0.693364	-0.711945	GAL	cyan
ENSG00000069812	-0.419572	-0.863984	-0.492074	-0.626657	0.834895	0.339664	0.719412	0.479383	HES2	black
ENSG00000069869	-0.96005	-0.741951	0.292713	0.017847	0.793936	0.947917	0.0101708	-0.128244	NEDD4	greenyellow
ENSG00000069956	-0.863926	-0.755989	0.187653	-0.0993642	0.785639	0.84835	0.0975227	-0.0151046	MAPK6	greenyellow
ENSG00000069998	0.914705	0.822453	0.056053	0.0319726	-0.920548	-0.85924	-0.312519	0.153209	CECR5	blue
ENSG00000070081	0.911995	0.75561	-0.230697	0.0430428	-0.791708	-0.89823	-0.0508113	0.0640903	NUCB2	blue
ENSG00000070087	0.936487	0.45413	-0.516721	-0.367286	-0.556656	-0.944621	0.280266	0.442411	PFN2	blue
ENSG00000070159	0.570017	0.468632	-0.106487	0.0275408	-0.518434	-0.548245	-0.106127	0.0876127	PTPN3	blue
ENSG00000070214	0.87029	0.374917	-0.679496	-0.340892	-0.43031	-0.904553	0.433475	0.351465	SLC44A1	blue
ENSG00000070404	-0.290415	-0.872056	-0.432697	-0.851294	0.761245	0.220428	0.714488	0.756882	FSTL3	black
ENSG00000070413	-0.377452	-0.449051	-0.497885	0.00278383	0.58168	0.295515	0.518772	-0.188571	DGCR2	black
ENSG00000070444	-0.488023	-0.881214	-0.283652	-0.646659	0.825818	0.418879	0.608887	0.518182	MNT	black
ENSG00000070476	-0.53778	-0.788917	0.0410239	-0.555502	0.689916	0.519276	0.273671	0.521141	ZXDC	black
ENSG00000070495	0.414842	0.601884	0.598753	0.146292	-0.718483	-0.315	-0.686488	0.0785505	JMJD6	blue
ENSG00000070540	-0.949838	-0.810549	0.225859	-0.0785184	0.848661	0.928202	0.0977899	-0.0311132	WIPI1	greenyellow
ENSG00000070614	-0.932908	-0.741184	0.127307	0.0574338	0.829174	0.90022	0.136213	-0.203309	NDST1	greenyellow
ENSG00000092621	-0.216551	0.220994	0.936702	0.277086	-0.291896	0.319408	-0.809958	-0.117208	PHGDH	darkturquoise
ENSG00000070718	0.719743	0.801646	0.0527969	0.274056	-0.821852	-0.660065	-0.364728	-0.153364	AP3M2	cyan
ENSG00000070731	-0.670374	-0.945273	-0.335215	-0.464742	0.955278	0.595454	0.611985	0.288467	ST6GALNAC2	black
ENSG00000070756	-0.0507674	0.653429	0.68334	0.879007	-0.554038	0.14436	-0.871628	-0.768916	PABPC1	midnightblue
ENSG00000125977	-0.175339	0.413386	0.933801	0.541287	-0.425005	0.281041	-0.913192	-0.401329	EIF2S2	darkturquoise
ENSG00000070770	-0.912414	-0.797568	0.272829	-0.134894	0.807264	0.906388	0.0503198	0.0348615	CSNK2A2	greenyellow
ENSG00000070778	-0.902503	-0.84485	0.113313	-0.155232	0.882917	0.869832	0.21427	0.0247939	PTPN21	greenyellow
ENSG00000070814	0.45694	0.897787	0.27191	0.729063	-0.811567	-0.394648	-0.602395	-0.625204	TCOF1	cyan
ENSG00000070831	0.875119	0.377893	-0.46885	-0.43775	-0.49772	-0.887815	0.286955	0.506188	CDC42	blue
ENSG00000070950	0.472419	0.639541	-0.0408508	0.389087	-0.592694	-0.436085	-0.288809	-0.347213	RAD18	cyan
ENSG00000071051	-0.877111	-0.803507	0.208708	-0.171691	0.816363	0.855257	0.126315	0.0672179	NCK2	greenyellow
ENSG00000071054	-0.868905	-0.348612	0.448035	0.479872	0.481409	0.879009	-0.289448	-0.565318	MAP4K4	greenyellow
ENSG00000071082	-0.467582	-0.698001	-0.544649	-0.250714	0.791016	0.36486	0.717619	0.0537932	RPL31	black
ENSG00000071127	-0.916451	-0.827446	-0.0331823	-0.0447135	0.918534	0.86467	0.297116	-0.128789	WDR1	black
ENSG00000071242	-0.854695	-0.668306	0.300358	-0.0232341	0.69654	0.845951	-0.0266475	-0.0480514	RPS6KA2	greenyellow
ENSG00000071243	-0.648296	-0.0907787	0.589569	0.533089	0.17999	0.701001	-0.533587	-0.533933	ING3	greenyellow
ENSG00000071462	0.551448	0.927571	0.406668	0.585565	-0.910097	-0.460725	-0.695308	-0.419118	WBSCR22	cyan
ENSG00000071537	-0.729059	-0.793418	0.279464	-0.391662	0.715482	0.735106	0.0686572	0.35151	SEL1L	greenyellow
ENSG00000071539	0.847033	0.811028	-0.259777	0.24748	-0.790427	-0.82992	-0.105113	-0.171216	TRIP13	blue
ENSG00000250510	0.0837209	-0.492798	-0.881956	-0.559345	0.500796	-0.195826	0.926799	0.403764	GPR162	darkgrey
ENSG00000071575	0.984187	0.719875	-0.318003	-0.0818018	-0.783394	-0.979001	0.0364617	0.194152	TRIB2	blue
ENSG00000071626	0.182656	0.781774	0.771784	0.712442	-0.757531	-0.0734401	-0.938709	-0.530331	DAZAP1	cyan
ENSG00000071794	0.888067	0.486939	-0.56488	-0.224762	-0.533034	-0.915037	0.316787	0.261186	HLTF	blue
ENSG00000071859	-0.901599	-0.849798	0.0959066	-0.154579	0.88904	0.866824	0.226478	0.0238273	FAM50A	greenyellow
ENSG00000071889	-0.392126	-0.828276	-0.264785	-0.696604	0.73285	0.336759	0.55103	0.625404	FAM3A	black
ENSG00000122971	0.139302	-0.543078	-0.865202	-0.731701	0.493764	-0.238741	0.924984	0.606793	ACADS	darkgrey
ENSG00000071967	-0.540347	-0.91294	-0.456154	-0.550275	0.907694	0.459533	0.691208	0.376724	CYBRD1	black
ENSG00000071994	-0.741996	-0.241682	0.461958	0.478738	0.369914	0.750696	-0.283221	-0.533085	PDCD2	greenyellow
ENSG00000072042	0.328621	0.541711	0.671066	0.145407	-0.656412	-0.226051	-0.700731	0.0809667	RDH11	blue
ENSG00000072062	0.723855	0.516532	-0.574653	0.0624398	-0.478762	-0.748158	0.23184	-0.0550815	PRKACA	blue
ENSG00000072071	0.576102	0.507056	-0.499191	0.228658	-0.420345	-0.601904	0.186286	-0.272575	LPHN1	blue
ENSG00000072110	0.559271	0.850509	0.319283	0.473628	-0.833749	-0.507637	-0.527215	-0.332641	ACTN1	cyan
ENSG00000072121	-0.88879	-0.618125	0.384641	0.0902841	0.659773	0.895508	-0.115667	-0.171531	ZFYVE26	greenyellow
ENSG00000072163	-0.728063	-0.970776	-0.144525	-0.507089	0.941124	0.678334	0.470561	0.375678	LIMS2	black
ENSG00000072210	-0.438156	-0.582149	-0.492393	-0.128932	0.688547	0.34602	0.603557	-0.0816862	ALDH3A2	black
ENSG00000072274	-0.658444	-0.743585	-0.295386	-0.175103	0.828047	0.577135	0.510065	-0.0245376	TFRC	black
ENSG00000072310	0.594871	0.437619	-0.574079	0.121291	-0.374872	-0.622017	0.235984	-0.152047	SREBF1	blue
ENSG00000072364	-0.832673	-0.709145	0.427262	-0.167438	0.677646	0.849501	-0.0840604	0.127034	AFF4	greenyellow
ENSG00000072401	0.731673	0.522725	-0.0875212	-0.162765	-0.624983	-0.703764	-0.102123	0.280617	UBE2D1	blue
ENSG00000072501	0.698548	0.926831	0.111463	0.491846	-0.89772	-0.643235	-0.46437	-0.364376	SMC1A	cyan
ENSG00000072506	-0.666537	-0.350575	-0.0892289	0.412428	0.542979	0.61468	0.137458	-0.592626	HSD17B10	greenyellow
ENSG00000072518	-0.570637	0.0465457	0.454619	0.71466	0.104059	0.604296	-0.483273	-0.75438	MARK2	greenyellow
ENSG00000072571	0.810715	0.956184	0.125615	0.374209	-0.970475	-0.750352	-0.456828	-0.219396	HMMR	cyan
ENSG00000072609	-0.871059	-0.683828	0.239728	0.00103816	0.729665	0.849886	0.0281145	-0.120044	CHFR	greenyellow
ENSG00000072682	0.790097	0.42583	0.00378415	-0.432862	-0.62262	-0.74643	-0.0974484	0.61476	P4HA2	blue
ENSG00000072778	0.355399	-0.348724	-0.395297	-0.924825	0.147118	-0.39031	0.539323	0.962862	ACADVL	darkorange
ENSG00000072786	-0.665361	-0.224938	0.436079	0.409293	0.313195	0.681802	-0.3133	-0.445249	STK10	greenyellow
ENSG00000072803	-0.877607	-0.556283	0.356657	0.185849	0.626632	0.896016	-0.158199	-0.268404	FBXW11	greenyellow
ENSG00000269713	-0.356951	0.204827	0.928138	0.469028	-0.215255	0.459015	-0.8297	-0.332694	NBPF9	darkturquoise
ENSG00000073060	0.868433	0.726153	-0.360985	0.114901	-0.722236	-0.873846	0.0427819	-0.0423094	SCARB1	blue
ENSG00000073111	0.825279	0.959387	0.124147	0.360104	-0.977348	-0.764825	-0.454725	-0.201458	MCM2	cyan
ENSG00000073150	-0.894855	-0.789029	0.337872	-0.16712	0.775044	0.891312	0.00918833	0.104264	PANX2	greenyellow
ENSG00000073282	-0.758712	-0.969423	-0.219399	-0.43033	0.98244	0.690043	0.547003	0.260037	TP63	black
ENSG00000073350	-0.619626	-0.686831	-0.247288	-0.143215	0.748026	0.553845	0.414978	-0.00606789	LLGL2	black
ENSG00000073584	-0.715939	-0.128762	0.636707	0.547448	0.221011	0.77343	-0.559744	-0.555227	SMARCE1	greenyellow
ENSG00000035862	-0.296958	-0.82453	-0.758039	-0.623158	0.833711	0.187435	0.924122	0.427115	TIMP2	darkgrey
ENSG00000073670	0.517367	0.235954	-0.740967	-0.0424329	-0.165962	-0.593027	0.507052	-0.0476501	ADAM11	blue
ENSG00000073792	0.447115	0.865964	0.384132	0.636843	-0.813479	-0.378456	-0.634333	-0.499672	IGF2BP2	cyan
ENSG00000073803	0.683963	0.0336022	-0.782789	-0.597312	-0.112162	-0.757257	0.692387	0.565471	MAP3K13	blue
ENSG00000073905	0.917148	0.813776	0.0308082	0.0241591	-0.909743	-0.865953	-0.286893	0.15336	VDAC1P1	blue
ENSG00000074071	0.686461	0.730363	-0.279089	0.352901	-0.673179	-0.682119	-0.0915005	-0.317342	MRPS34	blue
ENSG00000074181	0.657878	0.0494057	-0.623329	-0.610758	-0.155668	-0.707886	0.548058	0.619704	NOTCH3	blue
ENSG00000074201	0.76174	0.341027	-0.651091	-0.244178	-0.361778	-0.817828	0.453432	0.25061	CLNS1A	blue
ENSG00000074211	-0.924397	-0.808789	0.156727	-0.0889343	0.855442	0.900375	0.141647	-0.0520816	PPP2R2C	greenyellow
ENSG00000074266	0.897988	0.751897	-0.30289	0.0834036	-0.772247	-0.886864	-0.0369167	-0.00555315	EED	blue
ENSG00000074317	0.92789	0.73019	-0.0926064	-0.0812984	-0.832821	-0.893089	-0.153508	0.246315	SNCB	blue
ENSG00000074319	-0.86682	-0.492199	0.424272	0.244554	0.567976	0.880813	-0.214933	-0.315485	TSG101	greenyellow
ENSG00000074695	0.432984	-0.069219	-0.324153	-0.608865	-0.0583534	-0.479131	0.41973	0.650952	LMAN1	darkorange
ENSG00000074696	0.772402	0.729941	-0.265921	0.217522	-0.713413	-0.751907	-0.0907558	-0.157498	PTPLAD1	blue
ENSG00000074800	0.830232	0.894486	0.22457	0.199982	-0.972488	-0.757243	-0.491027	-0.000703743	ENO1	cyan
ENSG00000074842	-0.489013	0.128405	0.681498	0.634825	-0.0328045	0.538613	-0.616065	-0.579619	MYDGF	greenyellow
ENSG00000074855	-0.292532	-0.636191	-0.68225	-0.352407	0.703781	0.19298	0.767797	0.16448	ANO8	black
ENSG00000074964	-0.844804	-0.650989	0.17991	0.0641169	0.709745	0.827969	0.0477519	-0.17047	ARHGEF10L	greenyellow
ENSG00000075043	0.887951	0.738409	-0.302885	0.0842833	-0.749287	-0.884868	0.00818223	0.00785199	KCNQ2	blue
ENSG00000075089	0.704654	0.34699	-0.608627	-0.193396	-0.357963	-0.748296	0.376827	0.178879	ACTR6	blue
ENSG00000075131	0.658727	0.861524	0.0406525	0.473477	-0.814371	-0.616739	-0.367273	-0.377808	TIPIN	cyan
ENSG00000075142	-0.297765	-0.676516	-0.280581	-0.563838	0.614114	0.236238	0.534468	0.489338	SRI	black
ENSG00000075151	-0.764772	-0.289038	0.310521	0.494155	0.447817	0.764855	-0.186506	-0.582305	EIF4G3	greenyellow
ENSG00000075188	0.833488	0.846565	-0.0973053	0.260406	-0.856717	-0.796315	-0.242529	-0.14744	NUP37	blue
ENSG00000075213	0.818406	0.266136	-0.78058	-0.402695	-0.309912	-0.88046	0.583851	0.385413	SEMA3A	blue
ENSG00000075218	0.749667	0.98414	0.19734	0.480626	-0.974733	-0.688953	-0.51872	-0.323181	GTSE1	cyan
ENSG00000125398	0.266201	-0.317743	-0.939272	-0.51275	0.337044	-0.381427	0.92407	0.363015	SOX9	darkgrey
ENSG00000075239	0.729229	0.14991	-0.769146	-0.471881	-0.205736	-0.781276	0.587734	0.450382	ACAT1	blue
ENSG00000075275	-0.79012	-0.705774	-0.0306896	-0.0112173	0.790942	0.736425	0.275591	-0.124964	CELSR1	black
ENSG00000075336	0.822537	0.877343	-0.022454	0.279934	-0.886742	-0.780784	-0.303834	-0.161598	TIMM21	cyan
ENSG00000075391	-0.866938	-0.576785	0.228093	0.177927	0.668484	0.85773	-0.0432471	-0.300016	RASAL2	greenyellow
ENSG00000075413	-0.853298	-0.783757	-0.0408933	-0.0676709	0.862356	0.799348	0.284359	-0.102877	MARK3	greenyellow
ENSG00000075415	-0.852044	-0.689085	-0.110494	0.127913	0.829816	0.797572	0.282238	-0.31576	SLC25A3	greenyellow
ENSG00000075420	-0.88098	-0.719357	0.242948	-0.0381358	0.760235	0.862944	0.053288	-0.0755608	FNDC3B	greenyellow
ENSG00000075426	-0.446369	-0.873292	-0.182915	-0.73618	0.760573	0.400266	0.501947	0.657917	FOSL2	black
ENSG00000075461	-0.720599	-0.749094	-0.366027	-0.0530307	0.879418	0.637822	0.530885	-0.167383	CACNG4	black
ENSG00000075618	0.717071	0.383386	-0.00402738	-0.391235	-0.553367	-0.697014	-0.034763	0.556441	FSCN1	blue
ENSG00000075624	0.695035	0.898659	-0.10175	0.543052	-0.813306	-0.672876	-0.272834	-0.475832	ACTB	cyan
ENSG00000075643	-0.710465	-0.559129	0.363829	-0.0675641	0.535159	0.727795	-0.139875	0.0391625	MOCOS	greenyellow
ENSG00000075651	-0.497103	-0.747718	-0.367912	-0.386198	0.756489	0.431559	0.529632	0.233459	PLD1	black
ENSG00000075702	0.399713	0.940815	0.476271	0.791557	-0.863825	-0.321207	-0.75997	-0.650994	WDR62	cyan
ENSG00000075785	-0.907231	-0.439836	0.615139	0.317706	0.502863	0.940203	-0.371687	-0.355414	RAB7A	greenyellow
ENSG00000075826	0.691385	-0.00124185	-0.642863	-0.720787	-0.134332	-0.7393	0.601418	0.734438	SEC31B	blue
ENSG00000166401	-0.102341	0.384523	0.925166	0.395178	-0.434574	0.207617	-0.862366	-0.212925	SERPINB8	darkturquoise
ENSG00000075945	-0.407216	-0.855589	-0.562925	-0.604184	0.842959	0.319196	0.762264	0.444283	KIFAP3	black
ENSG00000076003	0.704772	0.978529	0.200132	0.532352	-0.952313	-0.64876	-0.52493	-0.385893	MCM6	cyan
ENSG00000242173	-0.126492	-0.765783	-0.719435	-0.783567	0.712239	0.0218164	0.923859	0.641383	ARHGDIG	darkgrey
ENSG00000135069	-0.0507313	0.511697	0.924994	0.531109	-0.532172	0.154837	-0.912593	-0.355161	PSAT1	darkturquoise
ENSG00000076248	0.858028	0.888062	-0.158056	0.315255	-0.869949	-0.832008	-0.209567	-0.211279	UNG	cyan
ENSG00000076356	-0.720267	-0.866382	-0.340545	-0.263863	0.93895	0.633362	0.58446	0.0569028	PLXNA2	black
ENSG00000076382	0.780921	0.944009	0.23274	0.352319	-0.975846	-0.718407	-0.50602	-0.17562	SPAG5	cyan
ENSG00000076513	-0.476962	-0.728274	-0.237707	-0.425763	0.700425	0.446822	0.41338	0.315385	ANKRD13A	black
ENSG00000076554	0.781207	0.576183	0.0700089	-0.189598	-0.721815	-0.724879	-0.233115	0.376138	TPD52	blue
ENSG00000076604	-0.852106	-0.792859	-0.00772202	-0.0881355	0.864842	0.79516	0.302484	-0.0701908	TRAF4	greenyellow
ENSG00000076662	0.633811	0.791033	0.339514	0.255735	-0.849524	-0.568918	-0.525382	-0.077904	ICAM3	cyan
ENSG00000076826	-0.619549	-0.467349	0.229741	0.00585617	0.481609	0.638458	-0.0966594	-0.0902784	CAMSAP3	greenyellow
ENSG00000076864	-0.870915	-0.765768	0.24406	-0.128634	0.776707	0.868647	0.0534045	0.0287036	RAP1GAP	greenyellow
ENSG00000076924	-0.533333	0.147907	0.741487	0.695361	-0.0489849	0.599665	-0.712245	-0.678489	XAB2	greenyellow
ENSG00000077097	0.814851	0.243578	-0.601716	-0.51537	-0.353233	-0.85322	0.45815	0.543186	TOP2B	blue
ENSG00000077147	0.794806	0.562494	-0.16533	-0.14722	-0.643481	-0.773599	-0.0307768	0.249572	TM9SF3	blue
ENSG00000077150	-0.638398	-0.445664	0.613016	-0.0854892	0.384751	0.666337	-0.2758	0.12155	NFKB2	greenyellow
ENSG00000077152	0.6921	0.917161	0.129291	0.479572	-0.8931	-0.640567	-0.464549	-0.341515	UBE2T	cyan
ENSG00000077232	-0.84092	-0.592425	0.177341	0.150325	0.691269	0.808243	0.0692252	-0.279478	DNAJC10	greenyellow
ENSG00000077312	0.62761	0.888759	0.085667	0.552863	-0.82443	-0.587682	-0.395134	-0.454661	SNRPA	cyan
ENSG00000176170	-0.332572	0.0965381	0.919008	0.247927	-0.164678	0.431337	-0.765667	-0.096029	SPHK1	darkturquoise
ENSG00000077463	-0.893487	-0.481427	0.447115	0.300562	0.574785	0.908694	-0.218511	-0.389241	SIRT6	greenyellow
ENSG00000077514	0.780659	0.888813	0.0429555	0.340482	-0.892607	-0.72745	-0.367512	-0.223659	POLD3	cyan
ENSG00000077549	0.512251	0.908162	0.226032	0.674047	-0.827022	-0.45732	-0.54443	-0.591378	CAPZB	cyan
ENSG00000077585	0.178936	-0.436319	-0.503006	-0.783053	0.315612	-0.245077	0.649977	0.737111	GPR137B	darkorange
ENSG00000077721	-0.939087	-0.641516	0.343949	0.137009	0.707563	0.938432	-0.093797	-0.242381	UBE2A	greenyellow
ENSG00000116990	-0.399412	0.081453	0.914198	0.322648	-0.131302	0.505153	-0.800325	-0.190907	MYCL	darkturquoise
ENSG00000077942	0.892023	0.787771	-0.0985658	0.0617246	-0.848567	-0.863837	-0.189264	0.0765143	FBLN1	blue
ENSG00000078018	-0.55288	-0.353845	-0.243713	0.310234	0.531021	0.502813	0.243614	-0.503701	MAP2	greenyellow
ENSG00000078043	0.922369	0.593895	-0.134012	-0.285719	-0.739899	-0.889036	-0.0596703	0.447759	PIAS2	blue
ENSG00000078081	-0.765155	-0.528057	0.619305	-0.0482331	0.483763	0.80493	-0.305328	0.0558366	LAMP3	greenyellow
ENSG00000078114	0.553115	0.0199758	-0.17543	-0.69356	-0.218139	-0.552296	0.233448	0.806268	NEBL	blue
ENSG00000078140	-0.829153	-0.401794	0.397952	0.367935	0.515212	0.842308	-0.207732	-0.448929	UBE2K	greenyellow
ENSG00000078142	0.58399	0.0354283	-0.253388	-0.663891	-0.220753	-0.587986	0.282066	0.760369	PIK3C3	blue
ENSG00000078237	0.217657	0.730211	0.45174	0.699646	-0.647929	-0.149481	-0.67024	-0.596742	C12orf5	cyan
ENSG00000078246	-0.766119	-0.79969	0.0194411	-0.232328	0.812075	0.739079	0.248614	0.136926	TULP3	black
ENSG00000078269	-0.248167	0.0483043	-0.181548	0.51681	0.1513	0.199154	0.0872191	-0.635181	SYNJ2	greenyellow
ENSG00000078319	0.159713	0.658604	0.624849	0.586559	-0.629651	-0.0821445	-0.746442	-0.467116	PMS2P1	cyan
ENSG00000078369	-0.881874	-0.5252	0.310918	0.2653	0.622874	0.884037	-0.13026	-0.365674	GNB1	greenyellow
ENSG00000078403	-0.655916	-0.54324	-0.0433448	0.0793801	0.643968	0.606308	0.236367	-0.20279	MLLT10	black
ENSG00000078487	-0.862792	-0.721545	0.21245	-0.0583869	0.759645	0.849848	0.0639084	-0.0567949	ZCWPW1	greenyellow
ENSG00000078618	-0.297471	-0.22406	-0.453079	0.256295	0.400109	0.235309	0.378676	-0.426818	NRD1	black
ENSG00000078668	0.87078	0.620048	-0.138892	-0.163524	-0.728733	-0.832893	-0.0973763	0.30791	VDAC3	blue
ENSG00000078687	-0.746107	-0.666014	-0.0456574	-0.0170895	0.741452	0.709731	0.216317	-0.133834	TNRC6C	black
ENSG00000078804	-0.137798	-0.665692	-0.235771	-0.813498	0.507671	0.117244	0.453033	0.788996	TP53INP2	black
ENSG00000078808	0.74942	0.288618	-0.665921	-0.33046	-0.330073	-0.795597	0.448727	0.32052	SDF4	blue
ENSG00000078902	-0.708026	-0.897247	-0.0639274	-0.449437	0.858595	0.66592	0.370078	0.327357	TOLLIP	black
ENSG00000079150	0.271986	-0.21248	-0.743932	-0.436188	0.218184	-0.348316	0.707724	0.32807	FKBP7	blue
ENSG00000079156	-0.93806	-0.557886	0.517183	0.198659	0.612216	0.954478	-0.247427	-0.257124	OSBPL6	greenyellow
ENSG00000079246	0.419288	0.871414	0.326584	0.708889	-0.796873	-0.348446	-0.630591	-0.609498	XRCC5	cyan
ENSG00000079332	-0.859493	-0.472667	0.277963	0.333742	0.593806	0.854023	-0.11906	-0.445904	SAR1A	greenyellow
ENSG00000079387	-0.365302	0.221276	0.239749	0.794492	-0.0253658	0.387539	-0.371304	-0.866199	SENP1	greenyellow
ENSG00000119138	-0.205286	-0.81659	-0.732353	-0.759318	0.778227	0.100801	0.923199	0.586241	KLF9	darkgrey
ENSG00000079459	-0.880748	-0.292545	0.590784	0.533062	0.408151	0.915036	-0.442733	-0.584655	FDFT1	greenyellow
ENSG00000079462	0.538771	0.174531	-0.788278	-0.153619	-0.131919	-0.618953	0.571112	0.0677837	PAFAH1B3	blue
ENSG00000079616	0.678119	0.902674	0.0562819	0.501757	-0.852377	-0.643408	-0.376111	-0.39642	KIF22	cyan
ENSG00000079739	0.875718	0.424461	-0.190893	-0.474304	-0.604681	-0.851627	0.0592969	0.629595	PGM1	blue
ENSG00000079819	0.804761	0.86658	0.210223	0.188962	-0.938034	-0.736992	-0.465511	-0.00143398	EPB41L2	blue
ENSG00000079999	-0.796631	-0.572456	0.0393154	0.172014	0.689742	0.761999	0.117803	-0.336902	KEAP1	greenyellow
ENSG00000080031	-0.355946	-0.386794	0.535867	-0.362045	0.227631	0.415318	-0.272558	0.454741	PTPRH	greenyellow
ENSG00000080200	0.177774	-0.357833	-0.15269	-0.791746	0.165263	-0.197373	0.35025	0.839467	CRYBG3	darkorange
ENSG00000080345	0.87713	0.697188	-0.147704	-0.049555	-0.774512	-0.856865	-0.106162	0.168928	RIF1	blue
ENSG00000080546	0.620314	0.0210936	-0.361273	-0.705296	-0.19623	-0.642576	0.392214	0.782872	SESN1	blue
ENSG00000080603	-0.915054	-0.36733	0.55777	0.471937	0.483398	0.941816	-0.371002	-0.534839	SRCAP	greenyellow
ENSG00000080802	-0.758806	-0.253862	0.591533	0.423159	0.333739	0.808588	-0.435896	-0.454601	CNOT4	greenyellow
ENSG00000080815	-0.847249	-0.694752	0.430166	-0.12206	0.669636	0.859993	-0.102045	0.0684208	PSEN1	greenyellow
ENSG00000080822	-0.341978	-0.712684	-0.240575	-0.581387	0.633688	0.288157	0.491245	0.528617	CLDND1	black
ENSG00000080823	0.46914	0.0941082	-0.835966	-0.162395	-0.0256497	-0.566317	0.673068	0.0541907	MOK	blue
ENSG00000080824	0.562383	0.94813	0.178056	0.695114	-0.857157	-0.511445	-0.519801	-0.601724	HSP90AA1	cyan
ENSG00000080839	0.422749	0.771999	0.135103	0.631149	-0.682967	-0.3778	-0.432367	-0.562182	RBL1	cyan
ENSG00000080845	-0.864681	-0.744553	0.414244	-0.173772	0.713627	0.875758	-0.0682529	0.126218	DLGAP4	greenyellow
ENSG00000080854	-0.7576	-0.651452	-0.0145617	0.00718863	0.726893	0.721685	0.178159	-0.141079	IGSF9B	black
ENSG00000080986	0.752943	0.941974	0.0917501	0.450741	-0.921524	-0.703294	-0.430053	-0.316656	NDC80	cyan
ENSG00000081014	0.860817	0.81533	-0.120495	0.165273	-0.83941	-0.827433	-0.197377	-0.060089	AP4E1	blue
ENSG00000081041	-0.778815	-0.581262	0.382688	-0.0113408	0.603675	0.766656	-0.0433478	-0.0480455	CXCL2	greenyellow
ENSG00000081059	0.839014	0.749066	-0.393991	0.208755	-0.707877	-0.852295	0.0559873	-0.164292	TCF7	blue
ENSG00000141076	-0.180374	0.496144	0.913787	0.700902	-0.463454	0.290248	-0.950318	-0.567236	CIRH1A	darkturquoise
ENSG00000081181	-0.863862	-0.739559	0.393747	-0.155483	0.720078	0.871623	-0.0401541	0.0929806	ARG2	greenyellow
ENSG00000081377	-0.645128	-0.797013	-0.448595	-0.207019	0.88831	0.558549	0.607241	-0.00784142	CDC14B	black
ENSG00000089006	-0.417701	0.098915	0.911535	0.37141	-0.13051	0.515729	-0.805259	-0.252308	SNX5	darkturquoise
ENSG00000120254	-0.10156	0.503787	0.911264	0.60256	-0.499117	0.205152	-0.909962	-0.440667	MTHFD1L	darkturquoise
ENSG00000081870	0.761721	0.205465	-0.554757	-0.514866	-0.320709	-0.793694	0.422486	0.555781	HSPB11	blue
ENSG00000065618	0.376177	-0.368971	-0.889252	-0.777445	0.295606	-0.476172	0.923066	0.680418	COL17A1	darkgrey
ENSG00000082153	0.749237	0.882254	0.323254	0.250066	-0.950097	-0.675477	-0.549439	-0.0509468	BZW1	cyan
ENSG00000082212	-0.620855	0.0457852	0.553852	0.740426	0.1048	0.663191	-0.541919	-0.758432	ME2	greenyellow
ENSG00000082213	-0.408959	0.194289	0.545207	0.683175	-0.0789542	0.47687	-0.612201	-0.681305	C5orf22	greenyellow
ENSG00000082512	0.857407	0.512635	-0.132681	-0.328198	-0.660239	-0.831659	-0.0235493	0.476732	TRAF5	blue
ENSG00000082515	0.423842	0.698313	-0.128772	0.613119	-0.572276	-0.408396	-0.237114	-0.59799	MRPL22	cyan
ENSG00000082516	0.756443	0.905605	0.0117816	0.41725	-0.883271	-0.71462	-0.358929	-0.307101	GEMIN5	cyan
ENSG00000082641	-0.603963	-0.587332	0.511602	-0.329418	0.470289	0.643652	-0.178935	0.364869	NFE2L1	greenyellow
ENSG00000082701	-0.859087	-0.609644	0.37049	0.0546476	0.649085	0.859093	-0.0999731	-0.143129	GSK3B	greenyellow
ENSG00000082805	-0.826394	-0.774598	0.107741	-0.153443	0.797908	0.803607	0.156913	0.0227794	ERC1	greenyellow
ENSG00000182871	0.135045	-0.464469	-0.896503	-0.583958	0.464835	-0.247595	0.922494	0.434125	COL18A1	darkgrey
ENSG00000082996	-0.796427	-0.871578	-0.0127511	-0.296906	0.883263	0.750487	0.34032	0.162262	RNF13	black
ENSG00000083123	0.748802	0.240841	-0.552379	-0.446119	-0.32202	-0.798739	0.456215	0.475246	BCKDHB	blue
ENSG00000083223	-0.881324	-0.65472	0.237459	0.0821209	0.71816	0.877053	-0.00542656	-0.200376	ZCCHC6	greenyellow
ENSG00000083290	-0.655193	-0.831456	-0.249379	-0.329252	0.869471	0.591228	0.524796	0.164376	ULK2	black
ENSG00000083312	-0.558915	0.0730123	0.716945	0.611419	0.0112281	0.628685	-0.671187	-0.611535	TNPO1	greenyellow
ENSG00000083444	0.975392	0.596274	-0.280161	-0.294185	-0.723209	-0.962253	0.0618935	0.428761	PLOD1	blue
ENSG00000083454	0.685673	0.784203	0.02603	0.308942	-0.78469	-0.629109	-0.344909	-0.205675	P2RX5	cyan
ENSG00000083520	-0.512346	-0.312678	-0.0638323	0.243757	0.457253	0.459969	0.177134	-0.375554	DIS3	black
ENSG00000083635	-0.327569	0.390806	0.631728	0.851448	-0.251408	0.397206	-0.734278	-0.8275	NUFIP1	midnightblue
ENSG00000083720	-0.241409	-0.437909	-0.568855	-0.150182	0.532974	0.161869	0.595334	-0.0397439	OXCT1	black
ENSG00000083750	-0.0150573	-0.591977	-0.636905	-0.695808	0.530501	-0.0677214	0.756096	0.585969	RRAGB	black
ENSG00000083799	-0.80355	-0.736008	0.298892	-0.198358	0.725746	0.800891	0.0534567	0.131827	CYLD	greenyellow
ENSG00000083807	0.76909	0.820139	0.00776661	0.255912	-0.833573	-0.735863	-0.282505	-0.118627	SLC27A5	cyan
ENSG00000083817	-0.684851	-0.570248	0.403211	-0.147156	0.540052	0.710754	-0.114213	0.109324	ZNF416	greenyellow
ENSG00000083844	-0.583304	-0.381645	0.509402	-0.0367236	0.349846	0.614824	-0.267531	0.0129581	ZNF264	greenyellow
ENSG00000083845	-0.806773	-0.806308	-0.136412	-0.122157	0.879405	0.745372	0.372396	-0.054179	RPS5	black
ENSG00000083857	-0.804091	-0.416268	0.357999	0.330544	0.510925	0.805817	-0.176093	-0.396259	FAT1	greenyellow
ENSG00000083937	-0.837459	-0.75988	0.284684	-0.18455	0.753094	0.81981	0.0717168	0.120582	CHMP2B	greenyellow
ENSG00000084070	0.850887	0.689743	0.0218017	-0.0784599	-0.809976	-0.793531	-0.251853	0.246655	SMAP2	blue
ENSG00000084072	0.588994	0.75056	0.396108	0.229689	-0.828629	-0.498737	-0.600959	-0.0372925	PPIE	cyan
ENSG00000084073	0.584641	0.667971	-0.350224	0.424671	-0.555143	-0.594027	0.00184613	-0.434515	ZMPSTE24	blue
ENSG00000084090	0.471329	0.803265	0.330265	0.524172	-0.765704	-0.408569	-0.549786	-0.3932	STARD7	cyan
ENSG00000084092	-0.782067	-0.747543	0.0106324	-0.116037	0.790287	0.763894	0.203763	-0.00821459	NOA1	black
ENSG00000084112	0.305294	0.0358819	0.202413	-0.468337	-0.227506	-0.255803	-0.128742	0.608578	SSH1	blue
ENSG00000084234	0.93192	0.652653	-0.280519	-0.134341	-0.737451	-0.912897	0.00326853	0.244711	APLP2	blue
ENSG00000084444	0.936433	0.811668	-0.0517867	0.0263999	-0.894564	-0.889332	-0.233277	0.128904	KIAA1467	blue
ENSG00000084623	-0.532485	0.18143	0.725229	0.757746	-0.0659457	0.603776	-0.732314	-0.736133	EIF3I	greenyellow
ENSG00000084652	0.660257	0.874033	0.0207939	0.497764	-0.813842	-0.620248	-0.352161	-0.413316	TXLNA	cyan
ENSG00000084676	-0.881228	-0.700046	0.153468	0.0292212	0.772736	0.858635	0.0911683	-0.172422	NCOA1	greenyellow
ENSG00000084693	0.813836	0.504245	-0.243407	-0.232154	-0.608672	-0.788438	0.01229	0.352186	AGBL5	blue
ENSG00000084710	0.216521	0.745714	0.49628	0.712021	-0.668735	-0.135802	-0.715533	-0.601764	EFR3B	cyan
ENSG00000084731	-0.584436	-0.750062	-0.0818641	-0.364729	0.716734	0.551415	0.313545	0.286055	KIF3C	black
ENSG00000084733	-0.957595	-0.763912	0.195129	0.0258209	0.835742	0.939658	0.0864418	-0.157688	RAB10	greenyellow
ENSG00000242071	0.0611118	-0.499715	-0.850583	-0.556873	0.515203	-0.175642	0.921929	0.403049	RPL7AP6	darkgrey
ENSG00000084764	-0.640708	-0.774634	-0.396162	-0.196267	0.856798	0.571801	0.547911	-0.000600858	MAPRE3	black
ENSG00000084774	-0.466473	-0.492619	-0.418399	0.03715	0.627273	0.390056	0.490265	-0.219398	CAD	black
ENSG00000085117	-0.686022	-0.928316	-0.286346	-0.433643	0.942277	0.608702	0.587337	0.269691	CD82	black
ENSG00000163702	0.0416162	-0.601199	-0.79693	-0.719646	0.564126	-0.141705	0.921297	0.574808	IL17RC	darkgrey
ENSG00000085365	0.744665	0.0992666	-0.570871	-0.670748	-0.245428	-0.765998	0.466692	0.706945	SCAMP1	blue
ENSG00000085377	0.923692	0.840716	-0.00178362	0.0735167	-0.917689	-0.874804	-0.277794	0.0957689	PREP	blue
ENSG00000085415	0.47954	0.924432	0.329055	0.707061	-0.845896	-0.41873	-0.618456	-0.581247	SEH1L	cyan
ENSG00000085433	-0.661012	-0.847188	-0.309826	-0.331219	0.888631	0.594573	0.540842	0.153929	WDR47	black
ENSG00000100300	-0.145653	-0.629003	-0.808652	-0.49013	0.6711	0.0242602	0.919119	0.306829	TSPO	darkgrey
ENSG00000085662	-0.869136	-0.583854	0.557231	0.0453729	0.584255	0.901223	-0.252281	-0.0736405	AKR1B1	greenyellow
ENSG00000085733	-0.220366	-0.641344	-0.0870504	-0.716776	0.505939	0.18412	0.411188	0.698014	CTTN	black
ENSG00000088356	-0.122822	0.502071	0.908765	0.625933	-0.494003	0.235177	-0.944153	-0.464442	PDRG1	darkturquoise
ENSG00000085831	-0.300919	-0.636942	-0.0169211	-0.631532	0.518396	0.275174	0.310419	0.613644	TTC39A	black
ENSG00000085832	-0.864315	-0.885174	0.0455456	-0.254919	0.904287	0.820386	0.289117	0.121587	EPS15	black
ENSG00000085840	0.825052	0.965279	0.102832	0.375941	-0.973837	-0.767611	-0.440617	-0.22417	ORC1	cyan
ENSG00000085982	-0.865009	-0.534134	0.424235	0.178986	0.595807	0.872545	-0.163563	-0.250595	USP40	greenyellow
ENSG00000085999	0.750167	0.906592	0.131757	0.374876	-0.91123	-0.692604	-0.441329	-0.232234	RAD54L	cyan
ENSG00000086015	-0.857547	-0.812171	-0.104912	-0.0676533	0.903989	0.795391	0.364115	-0.104137	MAST2	black
ENSG00000086061	-0.264038	0.460012	0.596069	0.897624	-0.31003	0.313461	-0.689859	-0.855198	DNAJA1	midnightblue
ENSG00000086062	-0.922764	-0.490539	0.33466	0.369172	0.614677	0.924478	-0.1703	-0.481021	B4GALT1	greenyellow
ENSG00000086065	0.502357	0.712632	0.430482	0.270249	-0.775516	-0.415614	-0.617375	-0.109876	CHMP5	cyan
ENSG00000086189	-0.711726	-0.0897892	0.536535	0.649786	0.233291	0.736703	-0.451936	-0.706234	DIMT1	greenyellow
ENSG00000086200	0.383369	0.636398	0.367634	0.355979	-0.659856	-0.29749	-0.583909	-0.225809	IPO11	cyan
ENSG00000086232	0.881586	0.40638	-0.571524	-0.353489	-0.480473	-0.91218	0.366826	0.396168	EIF2AK1	blue
ENSG00000086300	0.324454	-0.023746	0.0125447	-0.535546	-0.140505	-0.305303	0.0589805	0.60013	SNX10	blue
ENSG00000086475	0.856569	0.799499	0.0605974	0.0763266	-0.88459	-0.795554	-0.335368	0.0926318	SEPHS1	blue
ENSG00000086504	0.775976	0.886813	-0.13489	0.41816	-0.838623	-0.758439	-0.232954	-0.33065	MRPL28	cyan
ENSG00000086544	-0.848747	-0.881964	-0.0360607	-0.226894	0.920611	0.800652	0.348878	0.0882767	ITPKC	black
ENSG00000086712	0.576067	0.712424	-0.175071	0.429494	-0.621701	-0.572005	-0.134234	-0.395586	TXLNG	blue
ENSG00000086758	-0.875308	-0.699593	0.2088	0.00666541	0.762688	0.854497	0.087772	-0.123676	HUWE1	greenyellow
ENSG00000086827	0.713224	0.951832	0.182947	0.482005	-0.935239	-0.649654	-0.510869	-0.329104	ZW10	cyan
ENSG00000087074	-0.897982	-0.71133	0.462694	-0.0898131	0.701522	0.906413	-0.10252	0.0412522	PPP1R15A	greenyellow
ENSG00000087076	-0.740396	-0.569573	0.53883	-0.106926	0.514482	0.77551	-0.231767	0.110811	HSD17B14	greenyellow
ENSG00000087077	-0.531618	-0.703034	0.00607008	-0.40247	0.646278	0.516628	0.245088	0.36055	TRIP6	black
ENSG00000087086	-0.905958	-0.913844	-0.00244616	-0.217085	0.952758	0.859912	0.319816	0.0662831	FTL	black
ENSG00000087087	0.217785	0.460073	0.161872	0.387364	-0.397194	-0.213588	-0.237024	-0.336751	SRRT	cyan
ENSG00000087088	-0.787472	-0.53624	0.00345319	0.247086	0.687256	0.739066	0.176525	-0.408426	BAX	greenyellow
ENSG00000087191	-0.54974	0.148524	0.791356	0.712937	-0.0560674	0.627757	-0.75764	-0.658832	PSMC5	greenyellow
ENSG00000087263	-0.678162	-0.0973322	0.599359	0.566271	0.20494	0.728457	-0.509286	-0.580909	OGFOD1	greenyellow
ENSG00000087266	-0.584011	-0.477374	0.47564	-0.164006	0.41963	0.612368	-0.173768	0.178188	SH3BP2	greenyellow
ENSG00000087299	0.780296	0.767436	-0.13827	0.211116	-0.766147	-0.747886	-0.186768	-0.0987042	L2HGDH	blue
ENSG00000087302	-0.921704	-0.781366	0.0632426	-0.00207025	0.866477	0.876775	0.213775	-0.154455	C14orf166	greenyellow
ENSG00000113013	-0.462085	0.280843	0.905989	0.750361	-0.205499	0.558305	-0.888198	-0.672273	HSPA9	darkturquoise
ENSG00000087460	0.509593	-0.206811	-0.733569	-0.767097	0.0824911	-0.564127	0.686685	0.747421	GNAS	blue
ENSG00000087502	0.842082	0.413677	-0.620619	-0.267608	-0.450175	-0.888926	0.404794	0.289958	ERGIC2	blue
ENSG00000087586	0.704853	0.982584	0.266822	0.513282	-0.973059	-0.635777	-0.577307	-0.352019	AURKA	cyan
ENSG00000163481	-0.444184	0.191017	0.902303	0.574744	-0.159219	0.543198	-0.829785	-0.484873	RNF25	darkturquoise
ENSG00000088035	0.805346	0.574908	-0.544663	0.0362334	-0.550428	-0.827489	0.237116	-0.0281655	ALG6	blue
ENSG00000088205	0.563035	0.905535	0.350521	0.552342	-0.881398	-0.494872	-0.602287	-0.397632	DDX18	cyan
ENSG00000088247	0.534113	0.929375	0.304316	0.66127	-0.876004	-0.461749	-0.624371	-0.524928	KHSRP	cyan
ENSG00000088256	-0.55103	-0.29399	0.206874	0.234716	0.367189	0.542211	-0.0780205	-0.288908	GNA11	greenyellow
ENSG00000088298	-0.851455	-0.772645	0.181625	-0.141239	0.786953	0.832618	0.112353	0.0420215	EDEM2	greenyellow
ENSG00000088305	0.67378	0.858518	-0.119843	0.513733	-0.772823	-0.658583	-0.233972	-0.457202	DNMT3B	cyan
ENSG00000088325	0.69189	0.986961	0.336422	0.506138	-0.990987	-0.614686	-0.637975	-0.328918	TPX2	cyan
ENSG00000088340	0.7913	0.170111	-0.395261	-0.687061	-0.355544	-0.8003	0.33825	0.793203	FER1L4	blue
ENSG00000156510	-0.572851	-0.137441	0.901962	0.210644	0.0878395	0.65934	-0.677296	-0.10963	HKDC1	darkturquoise
ENSG00000088448	-0.447753	-0.712861	0.0710206	-0.578912	0.600725	0.44483	0.227297	0.551165	ANKRD10	black
ENSG00000088451	0.815472	0.445582	-0.312187	-0.300706	-0.54436	-0.807495	0.146698	0.385455	TGDS	blue
ENSG00000088682	0.745437	0.686499	-0.254875	0.16882	-0.670643	-0.740621	-0.0428953	-0.109741	COQ9	blue
ENSG00000167244	-0.258852	-0.768682	-0.790335	-0.571682	0.79172	0.149618	0.918322	0.368858	IGF2	darkgrey
ENSG00000088727	0.141019	0.263998	-0.274069	0.353507	-0.126591	-0.1807	0.128553	-0.429372	KIF9	blue
ENSG00000088766	0.880027	0.39277	-0.57671	-0.36173	-0.475227	-0.910148	0.370678	0.407464	CRLS1	blue
ENSG00000088808	-0.863355	-0.861008	0.0730424	-0.215965	0.886289	0.826613	0.262883	0.0950243	PPP1R13B	black
ENSG00000088812	0.886094	0.388454	-0.361865	-0.483579	-0.541619	-0.88241	0.200212	0.580158	ATRN	blue
ENSG00000088832	0.976673	0.771415	-0.18296	-0.0397298	-0.85127	-0.947989	-0.101235	0.182085	FKBP1A	blue
ENSG00000088833	-0.468195	0.188913	0.75076	0.669565	-0.101748	0.540222	-0.705522	-0.622279	NSFL1C	greenyellow
ENSG00000088836	-0.66364	-0.46748	-0.208256	0.265087	0.643138	0.598492	0.281839	-0.458748	SLC4A11	greenyellow
ENSG00000088854	-0.848148	-0.724418	0.231641	-0.0919798	0.74923	0.832111	0.066292	-0.0144752	C20orf194	greenyellow
ENSG00000088881	-0.529286	-0.350246	0.545766	-0.0646536	0.285401	0.577907	-0.332461	0.0959628	EBF4	greenyellow
ENSG00000088888	-0.762757	-0.952635	-0.291123	-0.368948	0.992726	0.685627	0.578932	0.174428	MAVS	black
ENSG00000088899	-0.815576	-0.967776	-0.0701357	-0.408555	0.962686	0.762675	0.423451	0.267799	LZTS3	black
ENSG00000088930	-0.662758	-0.0766546	0.469437	0.62489	0.220055	0.700281	-0.442916	-0.690437	XRN2	greenyellow
ENSG00000088986	0.925866	0.715958	-0.117143	-0.078542	-0.816985	-0.889975	-0.134056	0.24145	DYNLL1	blue
ENSG00000101266	-0.453514	0.0862049	0.901719	0.412894	-0.105214	0.546879	-0.792266	-0.305398	CSNK2A1	darkturquoise
ENSG00000089009	0.759146	0.223569	-0.384601	-0.544081	-0.377519	-0.762353	0.281427	0.648483	RPL6	blue
ENSG00000089022	-0.557818	0.0310068	0.594248	0.601391	0.0631199	0.621667	-0.589448	-0.605975	MAPKAPK5	greenyellow
ENSG00000089048	0.294691	0.662586	0.322384	0.524075	-0.608388	-0.236196	-0.532648	-0.430086	ESF1	cyan
ENSG00000089050	0.815598	0.639453	-0.343742	0.0466918	-0.651428	-0.819977	0.0680221	0.0197232	RBBP9	blue
ENSG00000089053	0.619492	0.275507	-0.67993	-0.149455	-0.261273	-0.681785	0.442445	0.112297	ANAPC5	blue
ENSG00000089057	0.63715	0.616509	-0.330133	0.244133	-0.555893	-0.659066	0.0575459	-0.238129	SLC23A2	blue
ENSG00000142156	-0.034113	-0.735545	-0.720032	-0.868939	0.649241	-0.0658856	0.918021	0.746969	COL6A1	darkgrey
ENSG00000089094	0.812082	0.69635	-0.102706	0.0356489	-0.757548	-0.773752	-0.167089	0.084334	KDM2B	blue
ENSG00000089157	-0.740752	-0.565718	0.376561	-0.022623	0.557289	0.762015	-0.139615	0.00815418	RPLP0	greenyellow
ENSG00000089159	0.800295	0.884592	0.195306	0.237968	-0.942245	-0.743202	-0.444547	-0.0571676	PXN	cyan
ENSG00000089163	0.678572	0.333074	-0.518864	-0.219349	-0.3571	-0.703381	0.307918	0.210046	SIRT4	blue
ENSG00000089177	-0.832918	-0.496487	0.13776	0.307002	0.635077	0.813182	-0.0117113	-0.444616	KIF16B	greenyellow
ENSG00000089195	0.137027	0.750143	0.793219	0.707085	-0.726034	-0.0313227	-0.943237	-0.54393	TRMT6	cyan
ENSG00000089199	-0.2807	-0.736295	-0.601091	-0.57749	0.733559	0.178193	0.782805	0.42371	CHGB	black
ENSG00000089220	0.793528	0.317271	-0.787812	-0.273676	-0.327219	-0.855925	0.550582	0.250644	PEBP1	blue
ENSG00000089234	-0.779552	-0.266232	0.729733	0.364937	0.299372	0.83795	-0.555303	-0.352215	BRAP	greenyellow
ENSG00000089280	0.638039	0.98709	0.323474	0.591776	-0.957315	-0.570021	-0.621164	-0.432887	FUS	cyan
ENSG00000089289	-0.679368	-0.965843	-0.12954	-0.579818	0.913085	0.626227	0.482838	0.459776	IGBP1	black
ENSG00000003056	-0.0563931	0.587101	0.900137	0.675868	-0.57564	0.171015	-0.983385	-0.512487	M6PR	darkturquoise
ENSG00000089335	0.552707	0.023153	-0.25967	-0.649602	-0.200332	-0.568275	0.288054	0.740516	ZNF302	blue
ENSG00000089351	-0.706187	-0.893469	-0.0920531	-0.429789	0.872595	0.664928	0.397901	0.31608	GRAMD1A	black
ENSG00000089597	0.959768	0.705389	-0.176869	-0.131518	-0.811146	-0.930174	-0.0880365	0.283735	GANAB	blue
ENSG00000089639	0.45775	-0.0612425	-0.307278	-0.635948	-0.089284	-0.491371	0.363044	0.716798	GMIP	darkorange
ENSG00000089685	0.774439	0.970295	0.237269	0.402015	-0.989388	-0.708221	-0.532577	-0.227102	BIRC5	cyan
ENSG00000089693	0.95195	0.587279	-0.500157	-0.174552	-0.640476	-0.969761	0.229361	0.247647	MLF2	blue
ENSG00000089820	0.686085	0.085728	-0.410057	-0.681918	-0.258847	-0.704275	0.366168	0.750804	ARHGAP4	blue
ENSG00000089876	0.835186	0.529236	-0.0246209	-0.31648	-0.69748	-0.788732	-0.132326	0.486642	DHX32	blue
ENSG00000166816	0.131174	-0.597428	-0.811197	-0.843909	0.515545	-0.227685	0.917964	0.729276	LDHD	darkgrey
ENSG00000090013	-0.658168	-0.994531	-0.31604	-0.578095	0.971886	0.583743	0.630879	0.420212	BLVRB	black
ENSG00000090020	-0.927561	-0.729871	0.260397	0.00733625	0.777391	0.91335	0.0255862	-0.110722	SLC9A1	greenyellow
ENSG00000167646	-0.229576	-0.735298	-0.780722	-0.561343	0.757379	0.113589	0.916973	0.369515	DNAAF3	darkgrey
ENSG00000090238	-0.630376	-0.950923	-0.270558	-0.565526	0.923202	0.55907	0.59039	0.421454	YPEL3	black
ENSG00000182796	0.148271	-0.603327	-0.803423	-0.877796	0.508414	-0.242306	0.916291	0.774689	TMEM198B	darkgrey
ENSG00000090273	0.0878801	0.755951	0.569734	0.894363	-0.641056	-0.00610704	-0.803496	-0.794474	NUDC	midnightblue
ENSG00000090372	-0.8569	-0.576864	0.206839	0.189692	0.674987	0.841282	0.00362379	-0.31531	STRN4	greenyellow
ENSG00000090432	-0.789484	-0.206755	0.376805	0.635469	0.376832	0.803269	-0.327419	-0.719312	MUL1	greenyellow
ENSG00000090520	-0.16966	-0.134855	-0.390301	0.181463	0.286997	0.0970206	0.377501	-0.346853	DNAJB11	black
ENSG00000090554	-0.0423664	-0.488101	-0.455547	-0.582312	0.439843	-0.0239224	0.595439	0.46267	FLT3LG	black
ENSG00000090581	-0.626251	-0.918944	-0.323284	-0.49386	0.912153	0.554054	0.585055	0.343924	GNPTG	black
ENSG00000090615	-0.744169	-0.864405	-0.0648857	-0.349072	0.872596	0.697024	0.375378	0.216469	GOLGA3	black
ENSG00000090661	-0.593752	-0.77936	-0.27289	-0.33388	0.811429	0.524947	0.512496	0.17437	CERS4	black
ENSG00000090674	-0.899772	-0.693517	0.0440521	0.121084	0.806686	0.859518	0.169811	-0.297567	MCOLN1	greenyellow
ENSG00000090857	0.267183	0.319868	0.569411	-0.0934469	-0.470157	-0.178273	-0.515568	0.292768	PDPR	blue
ENSG00000090861	-0.744084	-0.428362	0.703753	0.0559485	0.391795	0.799212	-0.419972	-0.0317738	AARS	greenyellow
ENSG00000090863	0.741102	0.068313	-0.5292	-0.731434	-0.236275	-0.768709	0.480141	0.785978	GLG1	blue
ENSG00000090889	0.721754	0.983087	0.29899	0.473019	-0.989488	-0.648494	-0.596266	-0.298905	KIF4A	cyan
ENSG00000090971	0.474769	-0.00354177	-0.841961	-0.342456	0.0271208	-0.561767	0.693919	0.255945	NAT14	blue
ENSG00000090975	-0.706217	-0.734667	-0.330034	-0.0698717	0.846482	0.632128	0.473591	-0.141431	PITPNM2	black
ENSG00000091073	-0.714432	-0.55839	0.22164	0.0136108	0.592497	0.695512	0.0325274	-0.0932701	DTX2	greenyellow
ENSG00000091140	0.807737	0.596836	-0.53358	0.063755	-0.567558	-0.831759	0.214375	-0.0408528	DLD	blue
ENSG00000107185	-0.380412	0.073895	0.899738	0.288064	-0.121291	0.477306	-0.746444	-0.156131	RGP1	darkturquoise
ENSG00000091317	0.496055	0.246361	-0.649372	-0.0368647	-0.187485	-0.562304	0.430927	-0.0439846	CMTM6	blue
ENSG00000091436	0.591263	0.909972	0.312374	0.534189	-0.884291	-0.523257	-0.58952	-0.377897	pk	cyan
ENSG00000091483	0.710639	0.725903	-0.275237	0.307114	-0.673589	-0.707099	-0.0648353	-0.252285	FH	blue
ENSG00000091490	-0.653629	-0.392136	0.61459	0.0325314	0.359439	0.693913	-0.337018	0.0187437	SEL1L3	greenyellow
ENSG00000091527	-0.959339	-0.638558	0.502875	0.101815	0.672872	0.975281	-0.19909	-0.166537	CDV3	greenyellow
ENSG00000091542	0.88733	0.581519	-0.0341576	-0.295033	-0.745638	-0.842045	-0.134755	0.47638	ALKBH5	blue
ENSG00000091640	-0.877942	-0.554104	0.512337	0.126464	0.582948	0.904237	-0.243562	-0.165492	SPAG7	greenyellow
ENSG00000091651	0.713334	0.958818	0.322544	0.439794	-0.978526	-0.637794	-0.601761	-0.256523	ORC6	cyan
ENSG00000091732	-0.275762	0.339113	0.454753	0.784424	-0.204613	0.327011	-0.576224	-0.747426	ZC3HC1	midnightblue
ENSG00000092010	0.626526	-0.0824444	-0.823556	-0.69375	-0.00353881	-0.707422	0.770694	0.648706	PSME1	blue
ENSG00000092096	0.753011	0.323725	-0.358892	-0.40276	-0.435051	-0.768216	0.242495	0.469689	SLC22A17	blue
ENSG00000092140	0.152249	0.609765	0.230627	0.6917	-0.491638	-0.106531	-0.496692	-0.653995	G2E3	cyan
ENSG00000092148	-0.847652	-0.641462	0.0859144	0.0997198	0.741225	0.805571	0.131492	-0.265565	HECTD1	greenyellow
ENSG00000092199	0.389507	0.821269	0.65554	0.524066	-0.845988	-0.280302	-0.84617	-0.335331	HNRNPC	cyan
ENSG00000092201	0.738253	0.966481	0.13703	0.49486	-0.943788	-0.676754	-0.483952	-0.356015	SUPT16H	cyan
ENSG00000092203	-0.852465	-0.505377	0.57842	0.140334	0.525576	0.885606	-0.306279	-0.169775	TOX4	greenyellow
ENSG00000092439	-0.568146	-0.767321	-0.060923	-0.44436	0.729719	0.513295	0.377061	0.342434	TRPM7	black
ENSG00000092445	-0.441569	-0.0099978	0.0992457	0.578518	0.173118	0.437428	-0.181065	-0.656589	TYRO3	greenyellow
ENSG00000092470	0.624096	0.94013	0.192459	0.583094	-0.891703	-0.563145	-0.536273	-0.472606	WDR76	cyan
ENSG00000128692	-0.148181	0.44637	0.898946	0.576085	-0.441506	0.249001	-0.889874	-0.42548	EIF2S2P4	darkturquoise
ENSG00000092820	-0.890998	-0.927752	-0.0307192	-0.251471	0.961017	0.845049	0.343487	0.0946601	EZR	black
ENSG00000121743	-0.0372865	-0.572755	-0.881337	-0.523795	0.6003	-0.0685098	0.91455	0.336763	GJA3	darkgrey
ENSG00000092847	0.762457	0.811512	-0.112717	0.299017	-0.796675	-0.729451	-0.234071	-0.22116	AGO1	blue
ENSG00000092853	0.726178	0.942909	0.133884	0.465131	-0.923364	-0.679149	-0.454638	-0.334307	CLSPN	cyan
ENSG00000092871	-0.873752	-0.421739	0.50375	0.335808	0.502114	0.886836	-0.298509	-0.412739	RFFL	greenyellow
ENSG00000092964	0.902966	0.69565	-0.276627	-0.0260574	-0.750845	-0.892921	-0.0164984	0.130703	DPYSL2	blue
ENSG00000092978	0.435895	0.519659	0.495416	0.0160973	-0.650377	-0.340498	-0.575668	0.170624	GPATCH2	blue
ENSG00000093000	0.0719598	0.606249	0.513953	0.69357	-0.529533	-0.0150998	-0.643771	-0.611442	NUP50	cyan
ENSG00000093009	0.724053	0.951843	0.263682	0.438012	-0.963124	-0.656267	-0.549843	-0.277216	CDC45	cyan
ENSG00000094804	0.513734	0.911321	0.566	0.537432	-0.931255	-0.412477	-0.799957	-0.346003	CDC6	cyan
ENSG00000094841	0.879077	0.576932	-0.0279841	-0.294347	-0.73942	-0.834164	-0.134449	0.471291	UPRT	blue
ENSG00000094880	0.798589	0.682746	-0.43202	0.165367	-0.643506	-0.811283	0.0851851	-0.143406	CDC23	blue
ENSG00000094914	-0.409368	-0.695217	-0.613012	-0.29856	0.769671	0.308666	0.740536	0.0863996	AAAS	black
ENSG00000094916	0.234011	0.718066	0.255062	0.742713	-0.600669	-0.196192	-0.524229	-0.690359	CBX5	cyan
ENSG00000094975	-0.423955	-0.766752	0.0109438	-0.682095	0.641012	0.397822	0.342029	0.631726	SUCO	black
ENSG00000095002	0.87282	0.861076	-0.21344	0.26715	-0.846028	-0.85558	-0.151061	-0.17573	MSH2	blue
ENSG00000095015	0.78889	0.65206	-0.0114947	-0.0481449	-0.750981	-0.740123	-0.227107	0.202729	MAP3K1	blue
ENSG00000095059	-0.581858	-0.252695	0.568153	0.18236	0.249562	0.643593	-0.417031	-0.141607	DHPS	greenyellow
ENSG00000095139	-0.858228	-0.774635	-0.0829442	-0.0179268	0.877509	0.796006	0.33648	-0.163103	ARCN1	greenyellow
ENSG00000095209	-0.717204	-0.361094	0.467137	0.250666	0.404575	0.758156	-0.307617	-0.261523	TMEM38B	greenyellow
ENSG00000095319	0.242734	0.687398	0.101765	0.75317	-0.536072	-0.212408	-0.405822	-0.750148	NUP188	cyan
ENSG00000095321	-0.740815	-0.893466	-0.356347	-0.27199	0.967757	0.656949	0.595079	0.0643412	CRAT	black
ENSG00000095370	-0.967436	-0.65773	0.385663	0.132145	0.723437	0.963254	-0.0925346	-0.230789	SH2D3C	greenyellow
ENSG00000095380	-0.232805	0.407806	0.352513	0.881817	-0.228284	0.267701	-0.517124	-0.876727	NANS	midnightblue
ENSG00000215319	-0.502146	0.0752822	0.898754	0.466616	-0.0633431	0.595311	-0.776248	-0.376004	EIF5P1	darkturquoise
ENSG00000095564	0.5409	-0.178664	-0.677455	-0.799052	0.0487302	-0.601144	0.692727	0.77599	BTAF1	darkorange
ENSG00000095787	-0.898455	-0.583753	0.42901	0.139849	0.633435	0.917298	-0.17266	-0.221236	WAC	greenyellow
ENSG00000095951	-0.930797	-0.62457	0.400926	0.12366	0.678835	0.931038	-0.129153	-0.225041	HIVEP1	greenyellow
ENSG00000096060	0.30697	0.755496	0.059343	0.794778	-0.600565	-0.282174	-0.404967	-0.767495	FKBP5	cyan
ENSG00000096070	-0.701142	-0.825747	-0.0761711	-0.33422	0.823243	0.661263	0.351052	0.191395	BRPF3	black
ENSG00000096080	-0.205808	0.484737	0.60716	0.861766	-0.360016	0.27572	-0.739619	-0.810047	MRPS18A	midnightblue
ENSG00000096092	0.557644	0.00892343	-0.850751	-0.438629	-0.0211879	-0.637695	0.706139	0.349957	TMEM14A	blue
ENSG00000096384	-0.152176	0.446333	0.168806	0.89432	-0.233926	0.170266	-0.39473	-0.940046	HSP90AB1	midnightblue
ENSG00000167881	-0.502521	0.145361	0.897143	0.592306	-0.109621	0.596559	-0.827326	-0.495027	SRP68	darkturquoise
ENSG00000096433	-0.706862	-0.716667	0.371994	-0.333812	0.644302	0.70678	0.0221799	0.314599	ITPR3	greenyellow
ENSG00000096696	-0.914478	-0.843243	0.243564	-0.19129	0.842989	0.904073	0.0937267	0.0971091	DSP	greenyellow
ENSG00000096717	-0.817971	-0.765565	0.246833	-0.196018	0.750548	0.817971	0.0618296	0.119625	SIRT1	greenyellow
ENSG00000096746	0.207218	0.791146	0.761336	0.69696	-0.775235	-0.0941111	-0.939617	-0.515802	HNRNPH3	cyan
ENSG00000096968	-0.584084	-0.527497	-0.0972936	-0.0119666	0.615933	0.529887	0.276779	-0.143225	JAK2	black
ENSG00000097021	0.0568279	0.66941	0.27663	0.920333	-0.487859	-0.027604	-0.521698	-0.898005	ACOT7	midnightblue
ENSG00000097033	-0.918273	-0.852103	0.198471	-0.183712	0.865256	0.899074	0.138178	0.0756843	SH3GLB1	greenyellow
ENSG00000097046	0.766534	0.740276	-0.270664	0.237173	-0.71209	-0.767671	-0.0588866	-0.202599	CDC7	blue
ENSG00000099194	0.603173	0.631254	0.430158	-0.00218776	-0.779785	-0.507004	-0.566443	0.223763	SCD	blue
ENSG00000099204	0.869061	0.591569	-0.0304371	-0.260047	-0.742171	-0.82717	-0.143163	0.435541	ABLIM1	blue
ENSG00000099219	0.792791	0.178068	-0.833846	-0.491755	-0.234829	-0.857518	0.645031	0.465989	ERMP1	blue
ENSG00000099246	-0.882446	-0.88846	0.131008	-0.264236	0.892414	0.853124	0.225727	0.149118	RAB18	greenyellow
ENSG00000099256	0.718958	0.850319	0.301994	0.262556	-0.911906	-0.647468	-0.520489	-0.0605214	PRTFDC1	cyan
ENSG00000099290	-0.745704	-0.640281	0.403429	-0.167914	0.597873	0.763984	-0.103892	0.133165	FAM21A	greenyellow
ENSG00000099326	0.127729	-0.515567	-0.459917	-0.84556	0.380252	-0.186455	0.662806	0.811329	MZF1	darkorange
ENSG00000099330	0.712127	0.244169	-0.234197	-0.521429	-0.404397	-0.702989	0.177831	0.615271	OCEL1	blue
ENSG00000099337	0.0884255	-0.394418	-0.263572	-0.666986	0.28038	-0.136056	0.481144	0.667537	KCNK6	darkorange
ENSG00000099338	-0.552436	-0.641984	0.175735	-0.356919	0.571501	0.54485	0.095869	0.329478	CATSPERG	black
ENSG00000099341	-0.736951	-0.0867617	0.423	0.735441	0.275316	0.753786	-0.392904	-0.826175	PSMD8	greenyellow
ENSG00000099365	0.662271	0.34485	-0.0938823	-0.324796	-0.4701	-0.654608	0.0687382	0.451645	STX1B	blue
ENSG00000099377	0.542699	-0.193701	-0.589182	-0.857378	0.0303768	-0.600882	0.649757	0.875343	HSD3B7	darkorange
ENSG00000099381	-0.698868	-0.208795	0.387657	0.497461	0.334142	0.720146	-0.315782	-0.563187	SETD1A	greenyellow
ENSG00000099385	0.945718	0.620242	-0.446035	-0.135498	-0.666985	-0.961763	0.189573	0.214897	BCL7C	blue
ENSG00000099622	-0.830532	-0.73229	0.362041	-0.181887	0.701763	0.845894	-0.0546197	0.129759	CIRBP	greenyellow
ENSG00000178035	-0.160551	-0.811583	-0.725762	-0.814961	0.751087	0.0605724	0.914313	0.670072	IMPDH2	darkgrey
ENSG00000099783	0.605763	0.950617	0.353179	0.565993	-0.934659	-0.524019	-0.653729	-0.398726	HNRNPM	cyan
ENSG00000099785	-0.752954	-0.471286	-0.013039	0.312626	0.623325	0.710652	0.110145	-0.473279	2020-03-02	greenyellow
ENSG00000133247	0.179576	-0.458121	-0.86264	-0.655006	0.434966	-0.285096	0.914276	0.519867	SUV420H2	darkgrey
ENSG00000099797	0.730165	0.689228	-0.36774	0.251475	-0.641031	-0.733826	-0.000294798	-0.215891	TECR	blue
ENSG00000099800	0.372481	0.657992	-0.10325	0.614864	-0.522339	-0.373646	-0.189889	-0.595631	TIMM13	cyan
ENSG00000099804	-0.888003	-0.619728	0.417411	0.0807622	0.658699	0.894111	-0.108064	-0.146547	CDC34	greenyellow
ENSG00000099812	-0.732383	-0.827256	0.241327	-0.429851	0.745788	0.730897	0.114315	0.384779	MISP	greenyellow
ENSG00000099814	-0.976924	-0.763164	0.195171	0.0515945	0.84277	0.951052	0.0879999	-0.188239	CEP170B	greenyellow
ENSG00000099817	0.472479	0.689109	-0.138326	0.532155	-0.57123	-0.468238	-0.166129	-0.500476	POLR2E	cyan
ENSG00000099822	-0.699759	-0.954296	-0.335769	-0.441114	0.971241	0.629316	0.598121	0.255237	HCN2	black
ENSG00000099840	-0.495967	-0.898136	-0.583508	-0.535121	0.921783	0.398829	0.807112	0.334319	IZUMO4	black
ENSG00000099860	-0.869065	-0.554202	0.568444	0.0906866	0.570786	0.890023	-0.243962	-0.112723	GADD45B	greenyellow
ENSG00000099864	-0.418732	-0.899811	-0.508978	-0.67386	0.859515	0.343042	0.744515	0.53292	PALM	black
ENSG00000099875	-0.769641	-0.986995	-0.206322	-0.449314	0.988888	0.70578	0.525727	0.287876	MKNK2	black
ENSG00000099889	-0.92218	-0.8953	0.052416	-0.186093	0.935646	0.881746	0.273265	0.0416132	ARVCF	black
ENSG00000099901	0.614334	0.908841	0.0537435	0.607458	-0.827508	-0.5805	-0.403636	-0.532856	RANBP1	cyan
ENSG00000099904	-0.569691	-0.838639	-0.442472	-0.391584	0.883261	0.472903	0.6823	0.202526	ZDHHC8	black
ENSG00000099910	-0.488131	-0.61406	-0.460212	-0.120227	0.72005	0.416469	0.559464	-0.0751204	KLHL22	black
ENSG00000099917	-0.452203	-0.646011	0.11907	-0.473683	0.55092	0.455456	0.156359	0.466881	MED15	black
ENSG00000099940	-0.767179	-0.500466	0.230575	0.167325	0.577443	0.771183	-0.0881165	-0.260521	SNAP29	greenyellow
ENSG00000099942	0.819231	0.674785	0.174549	-0.128742	-0.82757	-0.751965	-0.343642	0.333725	CRKL	blue
ENSG00000099949	-0.751549	-0.808138	-0.223039	-0.154336	0.884635	0.682614	0.464814	-0.0183713	LZTR1	black
ENSG00000099954	-0.486268	-0.827102	-0.386302	-0.517103	0.813317	0.431117	0.590526	0.36565	CECR2	black
ENSG00000099957	0.8792	0.465936	-0.513195	-0.269427	-0.540965	-0.893305	0.262805	0.319104	P2RX6	blue
ENSG00000099968	-0.661319	-0.68353	0.328106	-0.331213	0.6144	0.669754	0.0148114	0.322826	BCL2L13	greenyellow
ENSG00000099991	0.875612	0.663735	-0.0670971	-0.126719	-0.777891	-0.835151	-0.157274	0.282652	CABIN1	blue
ENSG00000099995	-0.472226	0.151056	0.627332	0.680735	-0.0495563	0.547997	-0.649111	-0.654791	SF3A1	greenyellow
ENSG00000099999	0.637654	0.299178	-0.0151676	-0.413182	-0.457972	-0.62156	0.0197056	0.539312	RNF215	blue
ENSG00000100003	0.770805	0.445262	0.0494417	-0.391592	-0.632313	-0.729586	-0.119616	0.573127	SEC14L2	blue
ENSG00000100014	-0.857037	-0.496726	0.38919	0.235397	0.570951	0.862947	-0.179611	-0.337365	SPECC1L	greenyellow
ENSG00000100023	0.75276	0.796622	0.0929222	0.208034	-0.838472	-0.709357	-0.341375	-0.0540068	PPIL2	cyan
ENSG00000100028	0.749946	0.803009	-0.183794	0.341213	-0.754403	-0.747648	-0.124192	-0.267248	SNRPD3	blue
ENSG00000183696	-0.554402	-0.116319	0.894664	0.223302	0.0731221	0.63218	-0.655334	-0.122975	UPP1	darkturquoise
ENSG00000100030	-0.853526	-0.490156	0.392252	0.248698	0.572604	0.86671	-0.179665	-0.337956	MAPK1	greenyellow
ENSG00000100031	-0.0841142	-0.455026	0.179636	-0.717105	0.251973	0.102162	0.106919	0.795276	GGT1	darkorange
ENSG00000181260	-0.586777	-0.0107756	0.89362	0.447917	0.0269343	0.672465	-0.731871	-0.376851	MTHFD2P7	darkturquoise
ENSG00000100056	-0.925041	-0.75315	0.02316	0.0672566	0.861322	0.878418	0.213428	-0.237569	DGCR14	greenyellow
ENSG00000100058	0.646439	0.623635	0.279735	-0.00950655	-0.745145	-0.566554	-0.436846	0.215823	CRYBB2P1	blue
ENSG00000100075	0.510772	-0.121715	-0.289058	-0.817522	-0.0938777	-0.522344	0.357336	0.898864	SLC25A1	darkorange
ENSG00000100092	0.78544	0.818279	0.0757703	0.21818	-0.859028	-0.734493	-0.333529	-0.0433779	SH3BP1	cyan
ENSG00000204262	0.443241	-0.253716	-0.961693	-0.651917	0.216957	-0.544486	0.911231	0.542849	COL5A2	darkgrey
ENSG00000100099	-0.468971	-0.31165	0.47492	-0.0468516	0.26156	0.517666	-0.283108	0.0992523	HPS4	greenyellow
ENSG00000157827	0.129554	-0.612539	-0.757547	-0.889761	0.514186	-0.227715	0.910683	0.788325	FMNL2	darkgrey
ENSG00000100106	0.648526	0.54615	0.158837	-0.0866565	-0.663845	-0.612423	-0.252775	0.262164	TRIOBP	blue
ENSG00000100129	-0.660804	-0.663907	0.222774	-0.249867	0.614936	0.675207	0.00589494	0.203989	EIF3L	greenyellow
ENSG00000100138	-0.474019	0.121257	0.235442	0.789545	0.0916521	0.465815	-0.286375	-0.870995	NHP2L1	greenyellow
ENSG00000100139	-0.979365	-0.653511	0.413554	0.148786	0.718387	0.978573	-0.12094	-0.236573	MICALL1	greenyellow
ENSG00000100154	-0.662591	-0.57694	-0.245459	0.0875523	0.717069	0.595683	0.361231	-0.288808	TTC28	black
ENSG00000100162	0.659089	0.897161	0.225594	0.452174	-0.893485	-0.601614	-0.510937	-0.2941	CENPM	cyan
ENSG00000100167	0.784809	0.156115	-0.623978	-0.610332	-0.284341	-0.812511	0.475382	0.647737	2020-09-03	blue
ENSG00000176986	-0.047359	-0.648694	-0.831067	-0.661963	0.629996	-0.0563299	0.910525	0.499265	SEC24C	darkgrey
ENSG00000100201	0.653943	0.158299	-0.267535	-0.565128	-0.330965	-0.641494	0.186537	0.6678	DDX17	blue
ENSG00000100216	0.567505	0.915202	0.0859024	0.671228	-0.820363	-0.527289	-0.451317	-0.590384	TOMM22	cyan
ENSG00000100219	-0.949145	-0.718116	0.43785	-0.0157585	0.733393	0.956345	-0.105848	-0.0497478	XBP1	greenyellow
ENSG00000100220	-0.680908	-0.0293183	0.593273	0.678821	0.16715	0.716288	-0.528486	-0.712405	RTCB	greenyellow
ENSG00000100221	-0.923591	-0.648705	0.481419	0.0426267	0.668933	0.944942	-0.177628	-0.100386	JOSD1	greenyellow
ENSG00000100225	-0.883628	-0.789485	0.157987	-0.110754	0.814932	0.870615	0.109292	-0.0073329	FBXO7	greenyellow
ENSG00000100228	0.56486	0.845741	0.336775	0.440325	-0.854444	-0.498282	-0.602597	-0.281846	RAB36	cyan
ENSG00000100242	0.253983	0.663864	0.407657	0.578616	-0.623304	-0.194699	-0.588161	-0.45363	SUN2	cyan
ENSG00000186010	-0.18605	-0.688499	-0.776231	-0.55424	0.710759	0.0694954	0.909015	0.360016	NDUFA13	darkgrey
ENSG00000152082	0.108196	-0.483688	-0.849401	-0.590914	0.476833	-0.218079	0.908294	0.455646	MZT2B	darkgrey
ENSG00000100263	-0.852098	-0.322889	0.65476	0.402522	0.400348	0.885595	-0.440328	-0.431121	RHBDD3	greenyellow
ENSG00000100266	0.839817	0.838507	-0.136525	0.245481	-0.840398	-0.815781	-0.199536	-0.142031	PACSIN2	blue
ENSG00000100280	0.605247	0.939221	0.232664	0.598922	-0.891493	-0.5499	-0.537804	-0.472772	AP1B1	cyan
ENSG00000100292	-0.782303	-0.472001	0.703551	0.0386531	0.433493	0.836047	-0.407847	-0.0137304	HMOX1	greenyellow
ENSG00000100294	0.511385	0.640571	-0.25757	0.442007	-0.539134	-0.523634	-0.0689999	-0.415239	MCAT	blue
ENSG00000100297	0.663261	0.945961	0.329733	0.479269	-0.94731	-0.598614	-0.586133	-0.31058	MCM5	cyan
ENSG00000100299	-0.186888	-0.731554	-0.349403	-0.797456	0.60973	0.129785	0.615454	0.731851	ARSA	black
ENSG00000174939	0.150346	-0.507334	-0.827121	-0.712324	0.464789	-0.258469	0.907873	0.583814	ASPHD1	darkgrey
ENSG00000100302	-0.232856	-0.28615	0.463447	-0.341244	0.141108	0.2881	-0.232318	0.428505	RASD2	darkorange
ENSG00000100304	0.83133	0.904091	0.0507656	0.292594	-0.929137	-0.774727	-0.379787	-0.136884	TTLL12	cyan
ENSG00000130304	0.134592	-0.533842	-0.797459	-0.754342	0.477242	-0.242238	0.907713	0.630358	SLC27A1	darkgrey
ENSG00000100311	-0.881298	-0.901492	-0.0589824	-0.212195	0.953158	0.823572	0.369385	0.043446	PDGFB	black
ENSG00000100316	0.936023	0.601628	-0.295697	-0.215213	-0.705107	-0.917806	0.0493375	0.342509	RPL3	blue
ENSG00000100321	0.834736	0.287005	-0.586849	-0.476194	-0.38785	-0.876749	0.434716	0.513863	SYNGR1	blue
ENSG00000225159	-0.35193	0.278101	0.890598	0.585595	-0.251017	0.442829	-0.84591	-0.485123	NPM1P39	darkturquoise
ENSG00000082014	0.358839	-0.294308	-0.918545	-0.61224	0.273297	-0.459824	0.907018	0.490697	SMARCD3	darkgrey
ENSG00000100345	-0.732214	-0.838091	-0.202932	-0.252874	0.885101	0.679325	0.440615	0.0830094	MYH9	black
ENSG00000100350	0.749054	0.847924	-0.0108726	0.335875	-0.842449	-0.698896	-0.341352	-0.21794	FOXRED2	cyan
ENSG00000100353	-0.805071	-0.581689	0.499806	-0.0240745	0.567072	0.839616	-0.223838	-0.00129093	EIF3D	greenyellow
ENSG00000198743	0.355064	-0.34017	-0.937298	-0.688235	0.298099	-0.452685	0.905438	0.563874	SLC5A3	darkgrey
ENSG00000100372	0.179522	0.122517	-0.630802	0.203974	0.027226	-0.249408	0.408003	-0.330878	SLC25A17	blue
ENSG00000100380	-0.142016	-0.64156	-0.238445	-0.770558	0.496623	0.123816	0.438819	0.744395	ST13	darkorange
ENSG00000100387	0.695534	0.212638	-0.763484	-0.326712	-0.225242	-0.766685	0.580135	0.282353	RBX1	blue
ENSG00000100393	-0.979095	-0.677867	0.369099	0.126332	0.741912	0.979748	-0.0933522	-0.226669	EP300	greenyellow
ENSG00000100401	0.152238	0.767426	0.525652	0.84458	-0.667991	-0.0795604	-0.75974	-0.736668	RANGAP1	cyan
ENSG00000100403	0.00341773	-0.061426	-0.544954	0.136717	0.20665	-0.0942132	0.495991	-0.27319	ZC3H7B	blue
ENSG00000100410	0.0123936	0.62257	0.442576	0.839248	-0.4854	0.0337877	-0.61942	-0.777393	PHF5A	midnightblue
ENSG00000100412	-0.715178	-0.439823	-0.128454	0.350906	0.625008	0.663434	0.183916	-0.541935	ACO2	greenyellow
ENSG00000100413	0.358278	0.710119	0.122145	0.608753	-0.604791	-0.335835	-0.364734	-0.565469	POLR3H	cyan
ENSG00000100416	0.936276	0.836251	-0.0844063	0.0831891	-0.898361	-0.900281	-0.212529	0.0699265	TRMU	blue
ENSG00000100417	-0.665609	-0.962813	-0.392439	-0.480802	0.97887	0.584313	0.661333	0.294911	PMM1	black
ENSG00000100422	-0.321597	-0.388892	-0.497798	0.0310971	0.509222	0.249439	0.465775	-0.182508	CERK	black
ENSG00000100426	-0.78825	-0.351571	0.438125	0.371186	0.455352	0.805363	-0.257579	-0.425555	ZBED4	greenyellow
ENSG00000100439	-0.804322	-0.86058	0.144507	-0.333315	0.830928	0.790238	0.191144	0.247372	ABHD4	greenyellow
ENSG00000100442	0.94657	0.576645	-0.471514	-0.202531	-0.638917	-0.960459	0.209015	0.275748	FKBP3	blue
ENSG00000100479	0.772802	0.759723	-0.118418	0.202681	-0.773418	-0.731661	-0.210453	-0.109022	POLE2	blue
ENSG00000100485	-0.627529	-0.84249	0.0148105	-0.513326	0.775749	0.604896	0.307977	0.428798	SOS2	black
ENSG00000100503	-0.707645	-0.143382	0.3805	0.622796	0.305561	0.726036	-0.336802	-0.714059	NIN	greenyellow
ENSG00000100504	0.659627	0.726926	0.443644	0.075579	-0.858851	-0.566974	-0.588318	0.154115	PYGL	blue
ENSG00000100519	0.515746	0.69777	0.451611	0.221064	-0.780474	-0.430171	-0.612205	-0.0293263	PSMC6	cyan
ENSG00000100526	0.66219	0.936829	0.323105	0.467399	-0.943486	-0.59375	-0.594691	-0.298008	CDKN3	cyan
ENSG00000132475	-0.15971	0.552975	0.890331	0.768447	-0.501355	0.261694	-0.956998	-0.637957	H3F3B	darkturquoise
ENSG00000100532	-0.803433	-0.407899	0.670176	0.191766	0.417532	0.85785	-0.431511	-0.190051	CGRRF1	greenyellow
ENSG00000100554	-0.780745	-0.456841	0.506274	0.145426	0.482155	0.820529	-0.291994	-0.177064	ATP6V1D	greenyellow
ENSG00000100567	-0.200992	0.298247	0.0940736	0.752139	-0.0995959	0.191941	-0.235799	-0.821669	PSMA3	midnightblue
ENSG00000100568	-0.640296	-0.644142	-0.324041	-0.00353711	0.763007	0.567201	0.448262	-0.174701	VTI1B	black
ENSG00000100575	-0.895907	-0.81784	0.177549	-0.142389	0.839085	0.871827	0.140195	0.0302822	TIMM9	greenyellow
ENSG00000100577	-0.709312	-0.749697	0.157606	-0.292493	0.718866	0.679398	0.174246	0.218552	GSTZ1	black
ENSG00000100580	0.817257	0.755238	-0.092045	0.111682	-0.795959	-0.7777	-0.219359	-0.00183509	TMED8	blue
ENSG00000100591	-0.602343	0.102645	0.630454	0.76842	0.0403086	0.653252	-0.630257	-0.7836	AHSA1	greenyellow
ENSG00000100592	-0.610123	-0.764134	-0.388458	-0.229276	0.831612	0.525192	0.563365	0.0311259	DAAM1	black
ENSG00000100593	0.904714	0.570765	-0.103801	-0.312356	-0.728395	-0.872241	-0.0707352	0.476126	ISM2	blue
ENSG00000100596	-0.701984	-0.781991	0.0991775	-0.324236	0.750042	0.674904	0.223746	0.25318	SPTLC2	black
ENSG00000100599	-0.770953	-0.343241	0.598676	0.300991	0.38895	0.815365	-0.386742	-0.313498	RIN3	greenyellow
ENSG00000130706	-0.639408	0.0453174	0.887437	0.620995	0.0173338	0.721542	-0.78288	-0.553947	ADRM1	darkturquoise
ENSG00000100612	-0.284493	-0.642437	0.0497778	-0.685045	0.493335	0.273734	0.263724	0.694793	DHRS7	black
ENSG00000100614	-0.82999	-0.836636	0.173801	-0.273349	0.819415	0.819987	0.148488	0.181078	PPM1A	greenyellow
ENSG00000100632	0.339993	0.716472	0.21433	0.610221	-0.626799	-0.313199	-0.435146	-0.541317	ERH	cyan
ENSG00000100650	0.740231	0.149688	-0.469322	-0.616387	-0.289072	-0.77437	0.436106	0.681347	SRSF5	blue
ENSG00000100664	-0.86368	-0.363606	0.723646	0.327203	0.403677	0.914839	-0.497425	-0.337328	EIF5	greenyellow
ENSG00000100714	0.343261	0.781926	0.0835823	0.778342	-0.629599	-0.31611	-0.397901	-0.741441	MTHFD1	cyan
ENSG00000100722	-0.761955	-0.360616	0.620833	0.231403	0.385249	0.817865	-0.411462	-0.247147	ZC3H14	greenyellow
ENSG00000100726	0.40267	0.650839	0.0877354	0.464663	-0.58093	-0.39863	-0.270984	-0.411925	TELO2	cyan
ENSG00000100749	0.658586	0.82576	0.0339226	0.415495	-0.791292	-0.624426	-0.331076	-0.319991	VRK1	cyan
ENSG00000100796	-0.820637	-0.608946	0.384308	-0.00985253	0.620206	0.83466	-0.131021	-0.05864	SMEK1	greenyellow
ENSG00000100804	-0.635777	-0.652662	-0.410873	0.00730025	0.792649	0.551667	0.520329	-0.231458	PSMB5	black
ENSG00000100811	0.274416	0.298296	0.585288	-0.144626	-0.472179	-0.186207	-0.530991	0.355694	YY1	blue
ENSG00000100814	-0.906019	-0.723891	0.381562	-0.0675336	0.731968	0.914136	-0.0674664	-0.00955153	CCNB1IP1	greenyellow
ENSG00000100815	-0.842092	-0.701996	0.196542	-0.0473803	0.744932	0.826587	0.0789284	-0.0750966	TRIP11	black
ENSG00000100852	0.661915	0.19828	-0.618199	-0.357499	-0.236046	-0.714689	0.497162	0.334614	ARHGAP5	blue
ENSG00000132003	-0.183561	0.21707	0.887224	0.248178	-0.286176	0.273781	-0.743733	-0.0825364	ZSWIM4	darkturquoise
ENSG00000140406	-0.418232	0.265875	0.886877	0.668502	-0.203441	0.498894	-0.814895	-0.584134	MESDC1	darkturquoise
ENSG00000100902	0.64525	0.764891	0.33771	0.208481	-0.833282	-0.577632	-0.499015	-0.0192497	PSMA6	cyan
ENSG00000100906	-0.846953	-0.634552	0.317252	0.0317802	0.679479	0.828384	0.00334245	-0.109716	NFKBIA	greenyellow
ENSG00000100908	0.477945	0.75002	0.594106	0.313233	-0.825057	-0.37769	-0.725465	-0.0845768	EMC9	cyan
ENSG00000100941	0.778226	0.607882	-0.31822	0.0359305	-0.619148	-0.786886	0.0673827	0.0339096	PNN	blue
ENSG00000100979	0.546059	-0.230701	-0.634927	-0.901398	0.061233	-0.596791	0.681131	0.911709	PLTP	darkorange
ENSG00000100983	0.13163	0.713848	0.746972	0.685159	-0.691395	-0.0230541	-0.912546	-0.519866	GSS	cyan
ENSG00000100991	-0.869383	-0.672605	0.441088	-0.0596818	0.668176	0.881267	-0.120601	0.0126914	TRPC4AP	greenyellow
ENSG00000100994	-0.735657	-0.941969	-0.316445	-0.375516	0.983537	0.651503	0.610798	0.185863	PYGB	black
ENSG00000100997	-0.657941	-0.874711	-0.41519	-0.333198	0.931215	0.581429	0.615226	0.139316	ABHD12	black
ENSG00000101000	-0.719625	-0.569602	0.383852	-0.0675232	0.566027	0.710381	-0.0395737	0.0308253	PROCR	greenyellow
ENSG00000101003	0.727816	0.852273	-0.103827	0.421405	-0.805674	-0.697821	-0.265013	-0.32459	GINS1	cyan
ENSG00000101004	-0.50612	-0.684685	-0.170003	-0.343149	0.670481	0.480061	0.339398	0.225801	NINL	black
ENSG00000101017	0.567103	0.10171	-0.324941	-0.511734	-0.216896	-0.597522	0.340309	0.566585	CD40	blue
ENSG00000101040	0.86387	0.440173	-0.499631	-0.294144	-0.513349	-0.887018	0.28897	0.36738	ZMYND8	blue
ENSG00000101057	0.915895	0.893279	-0.138903	0.230168	-0.906259	-0.885471	-0.21181	-0.108444	MYBL2	cyan
ENSG00000129455	0.0216732	-0.490578	-0.885743	-0.462582	0.529673	-0.132959	0.90443	0.292366	KLK8	darkgrey
ENSG00000101084	-0.712087	-0.129181	0.366383	0.655016	0.304352	0.717023	-0.314184	-0.744938	C20orf24	greenyellow
ENSG00000101104	0.330391	0.154892	0.323836	-0.353117	-0.335341	-0.288785	-0.210681	0.515605	PABPC1L	blue
ENSG00000100335	-0.11081	0.563659	0.88614	0.72002	-0.52819	0.220175	-0.958804	-0.574091	MIEF1	darkturquoise
ENSG00000101150	-0.9406	-0.85734	0.158821	-0.139199	0.888568	0.915268	0.163637	0.0169736	TPD52L2	greenyellow
ENSG00000218014	-0.0672197	-0.728302	-0.724424	-0.807043	0.658266	-0.033519	0.903234	0.677836	KRT19P1	darkgrey
ENSG00000101158	0.851436	0.781849	0.00419229	0.077889	-0.851113	-0.806685	-0.265039	0.0827958	NELFCD	blue
ENSG00000101160	0.521596	-0.192442	-0.863789	-0.699419	0.109505	-0.590863	0.785197	0.642525	CTSZ	blue
ENSG00000101161	-0.698121	-0.17924	0.318968	0.573361	0.32683	0.717551	-0.31401	-0.660926	PRPF6	greenyellow
ENSG00000101166	-0.835178	-0.560444	0.308375	0.141065	0.622772	0.843471	-0.0999575	-0.235515	SLMO2	greenyellow
ENSG00000101182	-0.026904	0.558946	0.208386	0.891881	-0.363111	0.0511429	-0.442273	-0.891373	PSMA7	midnightblue
ENSG00000101187	0.598867	0.713897	0.493598	0.120504	-0.831402	-0.515352	-0.595826	0.107375	SLCO4A1	blue
ENSG00000101188	0.925371	0.809304	-0.0849186	0.0565444	-0.871559	-0.898729	-0.170434	0.0921706	NTSR1	blue
ENSG00000101189	0.70484	0.797484	0.36247	0.160385	-0.89858	-0.617405	-0.57231	0.0501047	MRGBP	blue
ENSG00000101190	0.928384	0.481998	-0.523951	-0.313825	-0.566105	-0.940517	0.266925	0.385812	TCFL5	blue
ENSG00000101194	0.934534	0.543987	-0.383572	-0.267732	-0.640424	-0.937655	0.168644	0.371389	SLC17A9	blue
ENSG00000101197	0.932028	0.589184	-0.136456	-0.304578	-0.738266	-0.901753	-0.0421546	0.468852	BIRC7	blue
ENSG00000101198	0.878891	0.480194	-0.217263	-0.384283	-0.629359	-0.861667	0.0546679	0.521555	NKAIN4	blue
ENSG00000132879	-0.230991	-0.817614	-0.685808	-0.736543	0.781111	0.128816	0.900441	0.574265	FBXO44	darkgrey
ENSG00000101213	0.552616	0.13054	0.0418459	-0.599455	-0.350012	-0.517485	-0.00823763	0.750238	PTK6	blue
ENSG00000175376	-0.161149	0.483428	0.882758	0.665477	-0.457586	0.270982	-0.923865	-0.510007	EIF1AD	darkturquoise
ENSG00000101220	0.409809	0.197163	-0.750324	0.069697	-0.0846416	-0.477685	0.511649	-0.179148	C20orf27	blue
ENSG00000101224	-0.272745	-0.539073	-0.744868	-0.187243	0.655788	0.171139	0.756557	-0.027741	CDC25B	black
ENSG00000101236	0.783282	0.570667	0.150902	-0.240269	-0.742693	-0.721777	-0.273612	0.444437	RNF24	blue
ENSG00000101255	-0.836042	-0.433432	0.728584	0.170834	0.434371	0.880028	-0.428993	-0.161029	TRIB3	greenyellow
ENSG00000100889	-0.240596	0.138589	0.878431	0.209595	-0.22212	0.345145	-0.7548	-0.0495518	PCK2	darkturquoise
ENSG00000101290	-0.723067	-0.853186	-0.099265	-0.354559	0.858307	0.67455	0.382287	0.196665	CDS2	black
ENSG00000101298	-0.748506	-0.730311	-0.234646	-0.0361683	0.847406	0.677543	0.442619	-0.164961	SNPH	black
ENSG00000101311	-0.148952	0.0135375	0.102066	0.200782	0.05141	0.117575	-0.00736952	-0.223729	FERMT1	greenyellow
ENSG00000101331	0.913936	0.85582	0.0552041	0.0876607	-0.939699	-0.859394	-0.330166	0.0930375	CCM2L	blue
ENSG00000101335	0.959662	0.701711	-0.433623	-0.0246853	-0.728894	-0.966564	0.117091	0.101747	MYL9	blue
ENSG00000101346	0.584645	0.824697	0.106037	0.484386	-0.769973	-0.556877	-0.360076	-0.378323	POFUT1	cyan
ENSG00000101347	0.0801281	-0.0660358	-0.73807	0.0905661	0.213367	-0.162685	0.5622	-0.26565	SAMHD1	blue
ENSG00000101350	-0.571942	-0.549795	-0.2609	0.0177566	0.655627	0.531795	0.323657	-0.188716	KIF3B	black
ENSG00000101361	0.464692	0.952136	0.49017	0.711705	-0.904931	-0.382227	-0.758064	-0.550487	NOP56	cyan
ENSG00000101363	-0.781297	-0.25282	0.574704	0.464297	0.342748	0.820098	-0.443303	-0.479754	MANBAL	greenyellow
ENSG00000101365	0.718884	0.878147	-0.0371646	0.449491	-0.83029	-0.684061	-0.311694	-0.342046	IDH3B	cyan
ENSG00000101367	-0.804741	-0.179865	0.740991	0.545449	0.264502	0.866523	-0.604239	-0.552156	MAPRE1	greenyellow
ENSG00000101384	0.922711	0.760581	-0.14654	0.00491765	-0.829265	-0.894672	-0.123325	0.134483	JAG1	blue
ENSG00000101391	0.300922	0.78497	0.355336	0.727782	-0.701857	-0.232411	-0.637466	-0.632107	CDK5RAP1	cyan
ENSG00000101400	0.881746	0.410312	-0.385013	-0.422765	-0.544303	-0.874645	0.19072	0.536303	SNTA1	blue
ENSG00000101407	0.685909	0.853674	0.127434	0.376138	-0.852678	-0.645017	-0.409798	-0.230111	TTI1	cyan
ENSG00000101412	0.793971	0.976097	0.166685	0.413558	-0.982416	-0.73336	-0.488861	-0.251096	E2F1	cyan
ENSG00000101417	0.383341	0.493327	-0.369742	0.435191	-0.346717	-0.413377	0.0929563	-0.478199	PXMP4	blue
ENSG00000101421	-0.924122	-0.813147	0.119683	-0.0706076	0.867366	0.886587	0.186402	-0.0561145	CHMP4B	greenyellow
ENSG00000101439	0.893847	0.723267	-0.0464152	-0.0567382	-0.816805	-0.866621	-0.148711	0.219219	CST3	blue
ENSG00000101442	-0.444427	0.152596	0.366374	0.750951	0.0164971	0.472716	-0.436452	-0.759533	ACTR5	greenyellow
ENSG00000101444	-0.0415686	-0.104431	-0.666948	0.169341	0.268817	-0.0456751	0.514183	-0.351566	AHCY	blue
ENSG00000101447	0.835123	0.961715	0.124403	0.347089	-0.983019	-0.776526	-0.448401	-0.182014	FAM83D	cyan
ENSG00000101452	-0.141446	0.441716	0.264432	0.831633	-0.266941	0.171027	-0.453495	-0.853192	DHX35	midnightblue
ENSG00000101457	-0.308935	-0.650144	-0.109615	-0.592288	0.564848	0.253323	0.439358	0.540607	DNTTIP1	black
ENSG00000101460	-0.799337	-0.972075	-0.145691	-0.406748	0.977064	0.738862	0.475254	0.251738	MAP1LC3A	black
ENSG00000101464	0.707469	0.74709	-0.139434	0.275124	-0.723759	-0.693125	-0.15765	-0.213524	PIGU	blue
ENSG00000101473	-0.0925544	-0.526172	-0.736015	-0.424095	0.554099	0.00189481	0.769119	0.25247	ACOT8	black
ENSG00000101474	-0.255532	-0.288086	-0.562263	0.119548	0.44564	0.183719	0.474469	-0.322135	APMAP	black
ENSG00000101557	-0.702145	-0.25089	0.17118	0.515156	0.428869	0.680504	-0.095466	-0.65654	USP14	greenyellow
ENSG00000101577	0.788571	0.616986	0.0224579	-0.114807	-0.730647	-0.733876	-0.215457	0.261572	LPIN2	blue
ENSG00000101608	0.517393	0.872234	0.438358	0.520812	-0.863034	-0.452893	-0.635829	-0.355478	MYL12A	cyan
ENSG00000101654	0.698282	0.370171	0.104631	-0.439961	-0.569468	-0.650715	-0.135238	0.62041	RNMT	blue
ENSG00000101665	-0.681084	-0.519561	0.322497	-0.0268835	0.514182	0.702292	-0.126688	-0.0360353	SMAD7	greenyellow
ENSG00000101752	-0.744505	-0.818472	-0.252077	-0.190958	0.895307	0.680936	0.46488	-0.00268834	MIB1	black
ENSG00000101773	-0.746592	-0.246219	0.494889	0.465123	0.343787	0.783458	-0.392669	-0.508871	RBBP8	greenyellow
ENSG00000101782	0.0691758	-0.303244	0.188355	-0.693271	0.0836274	-0.0439338	0.0376486	0.803847	RIOK3	darkorange
ENSG00000101811	0.546391	0.918382	0.23257	0.643586	-0.85054	-0.488329	-0.551238	-0.529539	CSTF2	cyan
ENSG00000101843	0.84591	0.680442	-0.368976	0.0724419	-0.68593	-0.836459	0.0299517	-0.00664732	PSMD10	blue
ENSG00000101844	-0.759469	-0.683942	-0.0866672	-0.0118076	0.780959	0.712325	0.287552	-0.163809	ATG4A	black
ENSG00000138768	-0.241515	-0.807467	-0.684448	-0.705955	0.781864	0.136907	0.897512	0.54611	USO1	darkgrey
ENSG00000101849	-0.749862	-0.851286	-0.328589	-0.203862	0.935565	0.673486	0.536633	-0.00421803	TBL1X	black
ENSG00000101856	0.917133	0.852875	0.0254804	0.0904823	-0.931232	-0.865635	-0.308397	0.075745	PGRMC1	blue
ENSG00000101868	0.775986	0.953728	0.187121	0.394598	-0.967181	-0.709761	-0.50279	-0.228782	POLA1	cyan
ENSG00000101888	0.628384	0.603089	-0.332824	0.233502	-0.54606	-0.644117	0.048537	-0.221642	NXT2	blue
ENSG00000101911	0.915332	0.873857	-0.187999	0.218234	-0.879516	-0.893303	-0.163276	-0.107585	PRPS2	cyan
ENSG00000101935	-0.0716893	0.236282	-0.0838185	0.527995	-0.0845444	0.0668525	-0.107742	-0.628372	AMMECR1	greenyellow
ENSG00000101940	-0.812896	-0.927883	0.0162912	-0.388238	0.912017	0.768907	0.340187	0.266429	WDR13	black
ENSG00000101945	0.595752	0.918275	0.100709	0.630731	-0.842936	-0.546554	-0.473207	-0.535383	SUV39H1	cyan
ENSG00000101955	0.773518	0.407791	-0.387225	-0.28528	-0.482546	-0.793109	0.216741	0.335446	SRPX	blue
ENSG00000101966	-0.666815	-0.426775	0.462868	0.0461909	0.433337	0.68476	-0.200589	-0.0593273	XIAP	greenyellow
ENSG00000182307	-0.217512	0.478187	0.876343	0.737115	-0.424745	0.32506	-0.930998	-0.614392	C8orf33	darkturquoise
ENSG00000102007	-0.812658	-0.762754	0.348216	-0.246078	0.715814	0.824412	-0.0167522	0.205342	PLP2	greenyellow
ENSG00000102034	-0.93568	-0.506502	0.563991	0.270861	0.569841	0.957999	-0.297205	-0.319349	ELF4	greenyellow
ENSG00000102038	0.556583	-0.135519	-0.872589	-0.657505	0.0715012	-0.635627	0.794839	0.603736	SMARCA1	blue
ENSG00000102048	0.9542	0.780323	-0.127979	-0.0211273	-0.863572	-0.91772	-0.159273	0.166832	ASB9	blue
ENSG00000102078	0.462386	0.301561	0.046948	-0.194551	-0.418451	-0.412851	-0.17659	0.293465	SLC25A14	blue
ENSG00000102081	-0.76233	-0.50728	0.466356	0.0541285	0.508878	0.779698	-0.207465	-0.0730676	FMR1	greenyellow
ENSG00000102096	0.98682	0.633717	-0.293313	-0.239011	-0.743826	-0.975915	0.0616323	0.370938	PIM2	blue
ENSG00000102100	-0.538255	-0.896568	-0.492166	-0.510817	0.913722	0.443611	0.744898	0.315248	SLC35A2	black
ENSG00000102103	-0.939453	-0.794948	0.12418	-0.0242268	0.861902	0.904734	0.164815	-0.114348	PQBP1	greenyellow
ENSG00000196700	0.0541979	-0.412814	-0.919552	-0.368896	0.479167	-0.169415	0.896603	0.184098	ZNF512B	darkgrey
ENSG00000102119	-0.611017	-0.527848	0.529438	-0.223254	0.433826	0.659977	-0.243033	0.264837	EMD	greenyellow
ENSG00000102144	0.938264	0.71766	-0.0334755	-0.141015	-0.846388	-0.894139	-0.187897	0.318786	PGK1	blue
ENSG00000102158	0.779203	0.298529	-0.604995	-0.375979	-0.357886	-0.819419	0.440093	0.379845	MAGT1	blue
ENSG00000102172	0.736887	0.667527	0.310998	-0.0828751	-0.822646	-0.657909	-0.44665	0.30312	SMS	blue
ENSG00000102181	-0.502393	-0.601673	-0.567615	-0.0385473	0.745607	0.403607	0.626852	-0.192646	CD99L2	black
ENSG00000107317	-0.134703	-0.814899	-0.672819	-0.879053	0.727716	0.0405316	0.896035	0.752667	PTGDS	darkgrey
ENSG00000102221	-0.925802	-0.479846	0.442985	0.345624	0.582322	0.942005	-0.242715	-0.441164	JADE3	greenyellow
ENSG00000188375	-0.337107	0.326791	0.873492	0.661032	-0.27888	0.424457	-0.840765	-0.562674	H3F3C	darkturquoise
ENSG00000102226	0.468957	0.570145	0.50402	0.0618489	-0.698843	-0.373506	-0.59986	0.144257	USP11	blue
ENSG00000102241	0.0606363	0.367173	-0.00190103	0.522923	-0.2581	-0.0405011	-0.26072	-0.537124	HTATSF1	cyan
ENSG00000102265	0.683461	0.868254	0.379866	0.30541	-0.924801	-0.612401	-0.572808	-0.104484	TIMP1	cyan
ENSG00000102271	0.598711	0.498793	-0.296823	0.101021	-0.478934	-0.600449	0.0554883	-0.0572533	KLHL4	blue
ENSG00000102316	-0.462005	-0.904557	-0.345662	-0.702772	0.835153	0.399725	0.627263	0.563212	MAGED2	black
ENSG00000102317	-0.326606	-0.389957	-0.557459	0.0538562	0.548061	0.226828	0.579963	-0.261153	RBM3	black
ENSG00000102384	0.807259	0.945694	0.12496	0.360648	-0.964097	-0.749685	-0.453291	-0.207096	CENPI	cyan
ENSG00000198805	-0.180222	0.527221	0.870974	0.772709	-0.463319	0.270633	-0.898872	-0.647172	PNP	darkturquoise
ENSG00000102393	0.444944	0.657313	0.576896	0.215058	-0.754064	-0.349063	-0.668909	-0.0162193	GLA	blue
ENSG00000102401	-0.580924	-0.966056	-0.257353	-0.666036	0.905107	0.518292	0.596909	0.546329	ARMCX3	black
ENSG00000102531	-0.23406	-0.565516	-0.563145	-0.374955	0.615297	0.139131	0.714674	0.191597	FNDC3A	black
ENSG00000102572	-0.910275	-0.537232	0.561359	0.170609	0.573445	0.936749	-0.29707	-0.21573	STK24	greenyellow
ENSG00000102580	-0.908583	-0.829125	0.194642	-0.157265	0.854629	0.88314	0.157845	0.04312	DNAJC3	greenyellow
ENSG00000184216	-0.141643	0.551831	0.869553	0.756983	-0.495884	0.234181	-0.904499	-0.628462	IRAK1	darkturquoise
ENSG00000102743	0.591274	0.861226	0.253388	0.476781	-0.838999	-0.533866	-0.506531	-0.350834	SLC25A15	cyan
ENSG00000102753	-0.0979458	0.253693	-0.0454773	0.580506	-0.0797849	0.090342	-0.105971	-0.691986	KPNA3	greenyellow
ENSG00000102781	-0.714387	-0.865616	-0.307502	-0.281585	0.9216	0.641732	0.53984	0.10437	KATNAL1	black
ENSG00000102786	-0.730294	-0.335047	0.593291	0.238682	0.378049	0.761945	-0.344236	-0.25295	INTS6	greenyellow
ENSG00000102804	-0.473495	-0.891201	-0.575707	-0.557882	0.904976	0.371615	0.812336	0.367176	TSC22D1	black
ENSG00000102858	-0.344625	-0.548635	-0.420836	-0.247642	0.586167	0.285585	0.482458	0.0712506	MGRN1	black
ENSG00000102870	-0.352573	0.364798	0.6179	0.850871	-0.22722	0.414981	-0.713416	-0.824219	ZNF629	midnightblue
ENSG00000102871	0.0617869	-0.443858	-0.0318887	-0.816825	0.23832	-0.0653165	0.282248	0.885831	TRADD	darkorange
ENSG00000102878	0.55406	-0.107306	-0.366169	-0.828406	-0.0902371	-0.580657	0.441144	0.899291	HSF4	darkorange
ENSG00000102879	0.74354	0.323317	-0.760582	-0.208839	-0.320153	-0.800468	0.495781	0.179969	CORO1A	blue
ENSG00000102893	-0.176158	-0.584043	-0.732719	-0.406062	0.631022	0.069248	0.803267	0.223	PHKB	black
ENSG00000102900	0.376147	0.824898	0.314943	0.695845	-0.742701	-0.322125	-0.593476	-0.585234	NUP93	cyan
ENSG00000102901	-0.561364	-0.9534	-0.464475	-0.585394	0.948864	0.468644	0.744876	0.408104	CENPT	black
ENSG00000102931	-0.696215	-0.743502	-0.252854	-0.127348	0.833393	0.635232	0.442243	-0.038818	ARL2BP	black
ENSG00000102934	-0.462963	-0.717878	-0.457626	-0.347165	0.765029	0.386651	0.6196	0.154543	PLLP	black
ENSG00000102967	0.739748	0.934963	0.256256	0.385693	-0.957181	-0.66907	-0.539521	-0.206158	DHODH	cyan
ENSG00000102974	0.358651	0.847108	0.420539	0.720615	-0.78511	-0.272338	-0.728607	-0.591737	CTCF	cyan
ENSG00000102978	-0.156039	0.443385	0.27538	0.849997	-0.265427	0.186926	-0.476826	-0.872826	POLR2C	midnightblue
ENSG00000103005	0.180863	0.769837	0.343464	0.878769	-0.628383	-0.131231	-0.621304	-0.815389	USB1	cyan
ENSG00000103018	0.927099	0.862152	-0.102315	0.148333	-0.898928	-0.899487	-0.194789	-0.0108298	CYB5B	blue
ENSG00000103021	-0.640038	-0.684393	-0.170645	-0.145469	0.748838	0.595576	0.353252	0.00505243	CCDC113	black
ENSG00000131584	-0.0514623	-0.571509	-0.840166	-0.522055	0.593637	-0.0620742	0.895448	0.353158	ACAP3	darkgrey
ENSG00000103034	-0.924231	-0.798019	0.324827	-0.137978	0.801936	0.917587	0.0291298	0.0531295	NDRG4	greenyellow
ENSG00000103035	-0.772932	-0.148792	0.609573	0.610898	0.278389	0.81306	-0.488333	-0.632222	PSMD7	greenyellow
ENSG00000103042	-0.90216	-0.697059	0.254946	0.0256555	0.752377	0.881129	0.0325202	-0.145616	SLC38A7	greenyellow
ENSG00000103043	-0.668954	-0.134205	0.428989	0.565538	0.270772	0.69951	-0.369961	-0.623249	VAC14	greenyellow
ENSG00000174748	-0.275872	-0.839631	-0.675604	-0.712615	0.812041	0.172982	0.894033	0.54303	RPL15	darkgrey
ENSG00000103051	0.459205	0.059785	-0.672281	-0.274119	-0.0601262	-0.501632	0.500862	0.205915	COG4	blue
ENSG00000103064	-0.763264	-0.465603	0.036697	0.304795	0.622024	0.72318	0.102366	-0.475063	SLC7A6	greenyellow
ENSG00000103091	-0.797304	-0.801928	-0.144838	-0.116581	0.877735	0.751289	0.359227	-0.0531234	WDR59	black
ENSG00000103111	-0.883317	-0.537108	0.431977	0.1957	0.607008	0.88524	-0.1558	-0.279999	MON1B	greenyellow
ENSG00000103145	0.489154	-0.292694	-0.692529	-0.898214	0.136814	-0.553201	0.736777	0.888948	HCFC1R1	darkorange
ENSG00000103152	0.69436	0.100405	-0.709105	-0.528411	-0.179898	-0.749383	0.581174	0.539927	MPG	blue
ENSG00000103160	0.000802198	-0.171016	0.368478	-0.442631	-0.0126021	0.0594058	-0.198453	0.568542	HSDL1	darkorange
ENSG00000103187	0.826456	0.944062	0.142182	0.326477	-0.970016	-0.772292	-0.432501	-0.159409	COTL1	cyan
ENSG00000103196	0.818931	0.686559	-0.176874	0.0431708	-0.71765	-0.819786	-0.0260067	0.061096	CRISPLD2	blue
ENSG00000103202	0.90333	0.552867	-0.583654	-0.130206	-0.570376	-0.938257	0.308154	0.168516	NME4	blue
ENSG00000103249	-0.919494	-0.582659	0.287583	0.236759	0.690244	0.902236	-0.0354282	-0.355821	CLCN7	greenyellow
ENSG00000087365	-0.368606	0.14871	0.868989	0.413279	-0.170697	0.469488	-0.790658	-0.297707	SF3B2	darkturquoise
ENSG00000103260	0.524479	0.157028	-0.840682	-0.131577	-0.0904299	-0.606411	0.625446	0.0397856	METRN	blue
ENSG00000103264	-0.716622	-0.751478	0.209752	-0.313239	0.7047	0.718544	0.0940514	0.258461	FBXO31	greenyellow
ENSG00000103266	-0.451386	-0.691481	-0.503055	-0.300892	0.761626	0.360982	0.663154	0.110883	STUB1	black
ENSG00000117616	-0.0922428	-0.72555	-0.72634	-0.769806	0.669765	-0.00656716	0.893585	0.616417	RSRP1	darkgrey
ENSG00000103335	-0.564956	-0.824838	-0.427151	-0.383689	0.870263	0.474236	0.656468	0.198751	PIEZO1	black
ENSG00000103363	-0.112734	-0.313752	-0.404655	-0.189939	0.371604	0.0290667	0.520818	0.0856581	TCEB2	black
ENSG00000103365	0.963793	0.655269	-0.324551	-0.159266	-0.738758	-0.947526	0.0415094	0.266891	GGA2	blue
ENSG00000103404	-0.826604	-0.51632	0.285962	0.195794	0.599094	0.814557	-0.0841589	-0.30731	USP31	greenyellow
ENSG00000103479	0.527462	-0.168976	-0.843231	-0.689824	0.0943038	-0.616984	0.808461	0.610098	RBL2	blue
ENSG00000103485	0.680775	0.167968	-0.817847	-0.347796	-0.180521	-0.745682	0.613322	0.302654	QPRT	blue
ENSG00000103495	-0.670779	-0.479048	-0.0419716	0.181607	0.593562	0.645611	0.110612	-0.318964	MAZ	black
ENSG00000103496	-0.658104	-0.409973	0.560431	0.0291394	0.389856	0.673978	-0.250779	-0.0139014	STX4	greenyellow
ENSG00000103502	-0.601851	-0.765252	-0.298579	-0.266373	0.809146	0.536487	0.512177	0.109194	CDIPT	black
ENSG00000103507	0.83428	0.528618	0.0153132	-0.326365	-0.704773	-0.791522	-0.141106	0.511941	BCKDK	blue
ENSG00000103510	-0.787662	-0.616717	-0.0516561	0.136992	0.747681	0.737868	0.242707	-0.290891	KAT8	greenyellow
ENSG00000103550	0.0880479	0.619621	0.402742	0.737785	-0.511983	-0.0417103	-0.58221	-0.69029	KNOP1	cyan
ENSG00000103591	-0.454797	0.255712	0.812958	0.735149	-0.175846	0.539886	-0.826398	-0.660391	AAGAB	greenyellow
ENSG00000103642	0.530912	-0.097947	-0.665306	-0.640487	-0.0046006	-0.590265	0.620193	0.624739	LACTB	blue
ENSG00000103671	-0.664719	-0.767514	0.0369336	-0.345097	0.732396	0.649412	0.215863	0.247791	TRIP4	black
ENSG00000103769	-0.559378	-0.789163	-0.512508	-0.296033	0.863819	0.46006	0.685085	0.0860947	RAB11A	black
ENSG00000103811	0.7545	0.173374	-0.732099	-0.477233	-0.237449	-0.816284	0.595222	0.480719	CTSH	blue
ENSG00000103966	-0.711328	-0.154166	0.444849	0.591705	0.302699	0.716239	-0.322598	-0.635784	EHD4	greenyellow
ENSG00000104047	0.518842	0.11978	-0.792544	-0.2081	-0.0783293	-0.582808	0.599399	0.113062	DTWD1	blue
ENSG00000104081	-0.460873	-0.836054	-0.645544	-0.456143	0.88301	0.358214	0.812002	0.240754	BMF	black
ENSG00000104131	0.391533	0.814808	0.322014	0.656157	-0.75	-0.323584	-0.617442	-0.564501	EIF3J	cyan
ENSG00000104133	-0.773226	-0.781409	0.0203357	-0.205891	0.812666	0.726429	0.282043	0.0727512	SPG11	black
ENSG00000104142	-0.947784	-0.611789	0.326452	0.209931	0.706256	0.943894	-0.0807416	-0.318892	VPS18	greenyellow
ENSG00000104147	0.825534	0.920559	0.013169	0.337939	-0.919202	-0.788465	-0.332314	-0.196709	OIP5	cyan
ENSG00000104154	-0.492162	-0.868372	-0.543764	-0.513356	0.889324	0.397199	0.760785	0.311251	SLC30A4	black
ENSG00000104164	0.68631	0.0783108	-0.659505	-0.583655	-0.176698	-0.734323	0.556023	0.587097	BLOC1S6	blue
ENSG00000104228	-0.862854	-0.2682	0.621656	0.536917	0.381058	0.898207	-0.458834	-0.575084	TRIM35	greenyellow
ENSG00000104299	0.809879	0.54999	-0.4352	-0.0729588	-0.569338	-0.826782	0.178497	0.109903	INTS9	blue
ENSG00000104312	-0.932847	-0.789872	0.0742397	-0.00271686	0.873293	0.896023	0.195383	-0.154758	RIPK2	greenyellow
ENSG00000104324	-0.60541	-0.016967	0.709812	0.53437	0.0871923	0.672226	-0.641013	-0.50444	CPQ	greenyellow
ENSG00000104325	0.566669	0.000555354	-0.841402	-0.448951	-0.023247	-0.649383	0.717648	0.388459	DECR1	blue
ENSG00000104331	0.781644	0.574797	0.127015	-0.225667	-0.735	-0.729785	-0.244342	0.412776	IMPAD1	blue
ENSG00000104332	0.820169	0.795642	-0.304228	0.272947	-0.758823	-0.809693	-0.0775597	-0.219495	SFRP1	blue
ENSG00000104341	0.905626	0.805	-0.291254	0.165479	-0.804488	-0.896918	-0.04652	-0.0856825	LAPTM4B	blue
ENSG00000104388	-0.688437	-0.907206	-0.309732	-0.390493	0.933807	0.618053	0.562757	0.205029	RAB2A	black
ENSG00000104408	0.884558	0.456256	-0.575769	-0.26718	-0.516279	-0.908715	0.321646	0.301968	EIF3E	blue
ENSG00000255717	-0.63729	-0.131525	0.867767	0.336444	0.124155	0.715597	-0.669244	-0.256402	SNHG1	darkturquoise
ENSG00000104419	0.343766	-0.128671	0.0478652	-0.733044	-0.106842	-0.319093	0.0861705	0.865832	NDRG1	darkorange
ENSG00000104442	0.371712	0.656468	-0.0365513	0.578702	-0.550933	-0.34784	-0.280957	-0.546479	ARMC1	cyan
ENSG00000104472	0.508034	0.111769	-0.193694	-0.475445	-0.249515	-0.512226	0.178017	0.560021	CHRAC1	blue
ENSG00000104549	-0.569953	-0.334863	0.563371	0.0213933	0.28205	0.618147	-0.377213	0.012254	SQLE	greenyellow
ENSG00000104626	0.828708	0.86437	-0.127096	0.299997	-0.85616	-0.800197	-0.233275	-0.20286	ERI1	blue
ENSG00000104635	-0.906923	-0.419337	0.491692	0.397634	0.528315	0.914625	-0.273711	-0.474694	SLC39A14	greenyellow
ENSG00000104643	-0.758149	-0.306992	0.513524	0.35691	0.396233	0.784214	-0.324811	-0.403764	MTMR9	greenyellow
ENSG00000124831	-0.58631	-0.101791	0.865593	0.302689	0.0772098	0.676669	-0.703105	-0.222011	LRRFIP1	darkturquoise
ENSG00000104695	-0.896246	-0.614731	0.393612	0.105278	0.662683	0.903291	-0.119803	-0.173219	PPP2CB	greenyellow
ENSG00000104738	0.811924	0.910206	-0.0938005	0.388651	-0.881917	-0.775886	-0.283288	-0.289049	MCM4	cyan
ENSG00000104756	0.829041	0.569774	-0.212467	-0.148493	-0.652948	-0.796054	-0.00995544	0.253641	KCTD9	blue
ENSG00000104763	-0.606643	-0.85529	-0.213709	-0.456367	0.836546	0.54949	0.484565	0.353478	ASAH1	black
ENSG00000104765	0.835905	0.491886	-0.00821589	-0.381487	-0.676682	-0.792302	-0.108794	0.563848	BNIP3L	blue
ENSG00000104783	0.732763	0.728871	0.23626	0.0621275	-0.824302	-0.678639	-0.37934	0.128606	KCNN4	blue
ENSG00000132669	-0.022976	-0.582853	-0.865394	-0.570509	0.58809	-0.0810166	0.893294	0.387065	RIN2	darkgrey
ENSG00000104812	0.913453	0.646709	-0.0405806	-0.219383	-0.790003	-0.872646	-0.140537	0.393868	GYS1	blue
ENSG00000236801	0.0817301	-0.457707	-0.848351	-0.526613	0.47417	-0.198346	0.893288	0.365237	RPL24P8	darkgrey
ENSG00000104824	0.713535	0.885653	-0.0924995	0.492277	-0.819183	-0.684773	-0.277906	-0.414679	HNRNPL	cyan
ENSG00000104825	-0.904555	-0.351511	0.598945	0.462451	0.459797	0.930683	-0.392498	-0.515593	NFKBIB	greenyellow
ENSG00000104833	0.677532	0.0363684	-0.850249	-0.561396	-0.0937673	-0.750972	0.710696	0.506508	TUBB4A	blue
ENSG00000104852	0.858577	0.651505	-0.455533	0.0478062	-0.653307	-0.871075	0.125188	0.00392965	SNRNP70	blue
ENSG00000104856	-0.913293	-0.681292	0.421341	0.00644888	0.708409	0.914113	-0.0749097	-0.0742261	RELB	greenyellow
ENSG00000104866	-0.738858	-0.59183	0.265022	-0.0284176	0.610314	0.719546	0.0123371	-0.0290499	PPP1R37	greenyellow
ENSG00000104870	0.593638	-0.0485437	-0.651615	-0.651452	-0.0621575	-0.640455	0.600498	0.66774	FCGRT	blue
ENSG00000104872	0.79129	0.654933	0.131767	-0.108078	-0.789492	-0.738793	-0.293976	0.297153	PIH1D1	blue
ENSG00000104886	-0.869895	-0.811906	-0.0892136	-0.0549062	0.904348	0.81556	0.336996	-0.115789	PLEKHJ1	black
ENSG00000104889	0.732656	0.983828	0.275289	0.469058	-0.990689	-0.661987	-0.582755	-0.292916	RNASEH2A	cyan
ENSG00000104897	-0.881428	-0.629087	0.328597	0.0835155	0.687741	0.879039	-0.0492194	-0.161497	SF3A2	greenyellow
ENSG00000104899	0.699451	0.0894772	-0.603272	-0.599947	-0.198548	-0.751416	0.550721	0.628943	AMH	blue
ENSG00000104904	-0.0270039	0.508837	0.0988636	0.85738	-0.310075	0.036591	-0.345626	-0.880282	OAZ1	midnightblue
ENSG00000104915	0.760634	0.380054	-0.706336	-0.159603	-0.370097	-0.815396	0.447655	0.150056	STX10	blue
ENSG00000104936	-0.804321	-0.664648	0.000356777	0.0579054	0.760486	0.767209	0.205302	-0.23247	DMPK	black
ENSG00000104946	-0.76276	-0.912921	0.0182429	-0.433737	0.875215	0.727035	0.326012	0.328517	TBC1D17	black
ENSG00000104953	0.919718	0.7061	-0.0292426	-0.142266	-0.829824	-0.881131	-0.175722	0.306687	TLE6	blue
ENSG00000168071	-0.336654	-0.83669	-0.684337	-0.620124	0.842186	0.225377	0.892422	0.432272	CCDC88B	darkgrey
ENSG00000104964	0.503444	0.0601647	-0.849042	-0.256261	-0.0222877	-0.584297	0.675851	0.174928	AES	blue
ENSG00000104969	-0.600938	-0.028876	0.280813	0.699023	0.213676	0.608232	-0.30985	-0.787065	SGTA	greenyellow
ENSG00000104979	-0.429153	0.013618	0.0760437	0.622672	0.184575	0.401176	-0.0805741	-0.728613	C19orf53	greenyellow
ENSG00000104980	-0.918689	-0.47547	0.367415	0.376893	0.598178	0.917439	-0.179973	-0.478047	TIMM44	greenyellow
ENSG00000104998	0.906582	0.726492	-0.377583	0.0692034	-0.730095	-0.911573	0.067564	0.00401418	IL27RA	blue
ENSG00000105011	0.827608	0.9571	0.127721	0.349728	-0.97856	-0.767987	-0.449569	-0.19233	ASF1B	cyan
ENSG00000173402	-0.194993	-0.624324	-0.821261	-0.412154	0.68916	0.0769027	0.891406	0.201982	DAG1	darkgrey
ENSG00000105058	0.607572	0.874304	0.302703	0.455665	-0.876426	-0.538975	-0.567972	-0.289041	FAM32A	cyan
ENSG00000144136	0.0733973	0.633932	0.865316	0.590964	-0.647314	0.0398646	-0.931959	-0.407292	SLC20A1	darkturquoise
ENSG00000105088	0.754908	0.519828	-0.156949	-0.154769	-0.616688	-0.726751	-0.0582093	0.287269	OLFM2	blue
ENSG00000105127	-0.882185	-0.604031	0.222179	0.175211	0.695243	0.862171	-0.00817337	-0.275969	AKAP8	greenyellow
ENSG00000105135	0.715299	0.142667	-0.427558	-0.609068	-0.297158	-0.730683	0.348554	0.676874	ILVBL	blue
ENSG00000105137	0.889613	0.760475	0.0480901	-0.0421278	-0.873775	-0.838117	-0.284524	0.218596	SYDE1	blue
ENSG00000105171	-0.447839	0.0793201	0.17659	0.716499	0.112245	0.452569	-0.264346	-0.791912	POP4	greenyellow
ENSG00000105197	-0.226401	0.460587	0.654096	0.815049	-0.345081	0.288821	-0.73129	-0.752891	TIMM50	midnightblue
ENSG00000105220	0.925193	0.648732	-0.058818	-0.22639	-0.795076	-0.883083	-0.141947	0.402829	GPI	blue
ENSG00000105223	-0.503325	-0.92156	-0.249432	-0.712295	0.833882	0.453137	0.548122	0.603273	PLD3	black
ENSG00000105245	-0.549054	-0.863298	-0.360209	-0.501082	0.85193	0.481387	0.58908	0.343306	NUMBL	black
ENSG00000105248	-0.864945	-0.410289	0.460357	0.360881	0.513792	0.884005	-0.268562	-0.443905	CCDC94	greenyellow
ENSG00000105254	-0.855034	-0.719614	0.00345111	0.0361272	0.818411	0.812424	0.228566	-0.193972	TBCB	greenyellow
ENSG00000105258	-0.886236	-0.760297	0.0715896	-0.0142786	0.836227	0.843927	0.209489	-0.118709	POLR2I	greenyellow
ENSG00000081721	-0.457772	0.0445691	0.864836	0.368897	-0.0622005	0.549404	-0.748974	-0.251808	DUSP12	darkturquoise
ENSG00000105290	0.942782	0.701972	-0.276298	-0.0620929	-0.766653	-0.923075	-0.00969266	0.179676	APLP1	blue
ENSG00000105323	0.210939	0.58028	0.0576705	0.644293	-0.451286	-0.176542	-0.340729	-0.640836	HNRNPUL1	cyan
ENSG00000105325	-0.759404	-0.316886	0.211894	0.489749	0.484079	0.74158	-0.108373	-0.596752	FZR1	greenyellow
ENSG00000105327	-0.849878	-0.90814	0.0864609	-0.32535	0.902084	0.810678	0.288433	0.212305	BBC3	black
ENSG00000105329	0.401474	0.258981	0.386352	-0.31317	-0.452504	-0.329248	-0.355873	0.504774	TGFB1	blue
ENSG00000105339	-0.476064	-0.889245	-0.437145	-0.608365	0.86806	0.404016	0.696695	0.457471	DENND3	black
ENSG00000105355	0.871541	0.754367	-0.289543	0.130518	-0.762252	-0.873257	-0.0187704	-0.0402853	PLIN3	blue
ENSG00000105357	-0.587379	0.0696428	0.575866	0.722809	0.0637841	0.645953	-0.594485	-0.730158	MYH14	greenyellow
ENSG00000105364	-0.0830731	0.49173	0.164892	0.876039	-0.288508	0.0925776	-0.372384	-0.908617	MRPL4	midnightblue
ENSG00000105372	-0.838761	-0.876506	-0.0603432	-0.227085	0.918035	0.779549	0.373958	0.0752211	RPS19	black
ENSG00000105373	-0.415437	-0.673025	0.0667239	-0.542826	0.560836	0.409401	0.218608	0.538883	GLTSCR2	black
ENSG00000105376	0.674749	0.109308	-0.784408	-0.454054	-0.143529	-0.752874	0.667443	0.430593	ICAM5	blue
ENSG00000105379	0.635949	0.13608	-0.892488	-0.308395	-0.115267	-0.719988	0.694946	0.223433	ETFB	blue
ENSG00000105397	-0.338101	-0.699747	-0.332625	-0.527986	0.663443	0.263173	0.591472	0.429756	TYK2	black
ENSG00000105402	-0.850269	-0.709978	-0.0645126	0.0626277	0.82448	0.796625	0.259864	-0.247879	NAPA	greenyellow
ENSG00000105404	-0.772053	-0.957886	-0.247648	-0.377111	0.989454	0.697929	0.556425	0.204784	RABAC1	black
ENSG00000105419	-0.154257	-0.718511	-0.353206	-0.835584	0.583376	0.0962145	0.60816	0.768095	MEIS3	black
ENSG00000105426	0.643677	-0.0324904	-0.727621	-0.673976	-0.0728193	-0.714469	0.676178	0.669258	PTPRS	blue
ENSG00000105438	-0.215525	-0.732308	-0.46221	-0.709205	0.664035	0.146611	0.703927	0.590575	KDELR1	black
ENSG00000105443	-0.543495	-0.946156	-0.368288	-0.635471	0.907466	0.470326	0.665842	0.491444	CYTH2	black
ENSG00000105447	0.24938	0.780941	0.345059	0.78291	-0.669026	-0.196459	-0.628386	-0.699451	GRWD1	cyan
ENSG00000105486	0.895773	0.82079	-0.14315	0.147773	-0.855971	-0.864207	-0.183513	-0.0193395	LIG1	blue
ENSG00000105499	-0.874621	-0.907231	-0.00323114	-0.253172	0.936556	0.827197	0.330245	0.111017	PLA2G4C	black
ENSG00000105514	0.380208	-0.355339	-0.604663	-0.887535	0.192428	-0.442303	0.683665	0.860509	RAB3D	darkorange
ENSG00000173992	0.00132018	-0.658297	-0.715114	-0.789365	0.591272	-0.0965096	0.888473	0.678555	CCS	darkgrey
ENSG00000105518	-0.6137	-0.239177	0.635578	0.214007	0.239076	0.662907	-0.451139	-0.180945	TMEM205	greenyellow
ENSG00000105519	-0.667797	-0.91224	-0.250561	-0.457359	0.915738	0.595916	0.555863	0.29198	CAPS	black
ENSG00000105552	0.721562	0.795459	-0.130979	0.360206	-0.762212	-0.694124	-0.211721	-0.264879	BCAT2	blue
ENSG00000105559	0.860694	0.479248	-0.377172	-0.276573	-0.566471	-0.87274	0.197486	0.377741	PLEKHA4	blue
ENSG00000105583	-0.756685	-0.778758	-0.288452	-0.0816641	0.893274	0.680231	0.493636	-0.118371	WDR83OS	black
ENSG00000105607	0.286512	0.743041	0.454512	0.641114	-0.682353	-0.230173	-0.624182	-0.501202	GCDH	cyan
ENSG00000105612	-0.493239	-0.367783	0.486447	-0.0945478	0.298344	0.543841	-0.272198	0.158393	DNASE2	greenyellow
ENSG00000105613	-0.125003	-0.502052	0.103086	-0.701294	0.317795	0.134381	0.168608	0.749088	MAST1	darkorange
ENSG00000105640	-0.697317	-0.925792	-0.297969	-0.410163	0.951551	0.61796	0.596006	0.236201	RPL18A	black
ENSG00000105649	0.879272	0.604924	-0.340261	-0.103485	-0.661664	-0.873	0.075795	0.195933	RAB3A	blue
ENSG00000105655	0.537601	-0.172839	-0.853884	-0.697965	0.0991933	-0.626751	0.826545	0.644548	ISYNA1	blue
ENSG00000105662	-0.286474	-0.687827	-0.529435	-0.502203	0.678039	0.20897	0.672993	0.356633	CRTC1	black
ENSG00000105668	0.852906	0.442384	-0.12006	-0.440384	-0.626132	-0.821364	-0.00309033	0.601723	UPK1A	blue
ENSG00000105669	-0.767922	-0.855164	0.00795848	-0.330292	0.84906	0.732393	0.294584	0.200462	COPE	black
ENSG00000105677	-0.564527	0.0365107	0.341832	0.739865	0.150774	0.585295	-0.365159	-0.79671	TMEM147	greenyellow
ENSG00000105696	-0.437982	-0.835823	-0.424804	-0.565564	0.806922	0.365382	0.657948	0.428654	TMEM59L	black
ENSG00000105698	-0.822332	-0.37418	0.398122	0.393579	0.484908	0.837206	-0.260792	-0.466134	USF2	greenyellow
ENSG00000105699	0.774826	0.258763	-0.506526	-0.467229	-0.373131	-0.805565	0.373312	0.514075	LSR	blue
ENSG00000105700	-0.744801	-0.423154	0.631402	0.0935365	0.406124	0.786486	-0.375989	-0.0770485	KXD1	greenyellow
ENSG00000105701	0.290142	-0.426424	-0.485404	-0.928271	0.248206	-0.34479	0.640299	0.926401	FKBP8	darkorange
ENSG00000105711	-0.839035	-0.615878	0.160931	0.11038	0.704325	0.818239	0.0579632	-0.254879	SCN1B	greenyellow
ENSG00000159640	-0.19743	-0.635167	-0.825647	-0.420488	0.697924	0.0830309	0.888403	0.214591	ACE	darkgrey
ENSG00000105723	-0.840657	-0.377488	0.330064	0.449018	0.521677	0.841364	-0.180221	-0.542373	GSK3A	greenyellow
ENSG00000105732	-0.881719	-0.379761	0.633306	0.370781	0.443309	0.923332	-0.441056	-0.397403	ZNF574	greenyellow
ENSG00000105738	-0.392912	-0.166247	0.46391	0.0822174	0.151278	0.421511	-0.283219	-0.0719887	SIPA1L3	greenyellow
ENSG00000230409	-0.640563	-0.197364	0.864343	0.223075	0.161321	0.721956	-0.647312	-0.147913	TCEA1P2	darkturquoise
ENSG00000070761	-0.194748	0.412679	0.863294	0.60981	-0.395408	0.299405	-0.870163	-0.484178	CFAP20	darkturquoise
ENSG00000105821	0.230284	0.799803	0.474155	0.797781	-0.704794	-0.165445	-0.703176	-0.69767	DNAJC2	cyan
ENSG00000105835	0.495349	0.546444	0.506877	-0.022428	-0.695158	-0.405117	-0.567587	0.24765	NAMPT	blue
ENSG00000105854	0.692883	0.0990243	-0.839947	-0.481143	-0.142309	-0.769886	0.680576	0.434601	PON2	blue
ENSG00000105856	-0.578012	-0.769226	0.157936	-0.519133	0.662044	0.562617	0.184748	0.490015	HBP1	black
ENSG00000105879	-0.57047	0.0355794	0.805646	0.541811	0.0237202	0.633877	-0.665106	-0.483153	CBLL1	greenyellow
ENSG00000105928	-0.889317	-0.72393	0.224598	-0.0288462	0.767363	0.88028	0.0416376	-0.0862321	DFNA5	greenyellow
ENSG00000105939	-0.919	-0.878366	0.0972346	-0.180704	0.912505	0.884087	0.237238	0.0443743	ZC3HAV1	greenyellow
ENSG00000105953	-0.592405	-0.613512	-0.357042	-0.0190462	0.736196	0.517641	0.459616	-0.186551	OGDH	black
ENSG00000105968	0.81469	0.73646	-0.411655	0.231855	-0.686631	-0.831896	0.0660484	-0.198767	H2AFV	blue
ENSG00000105974	0.589994	0.447329	-0.343276	0.0384631	-0.418171	-0.630632	0.192515	-0.0219884	CAV1	blue
ENSG00000105988	0.472784	0.706903	-0.0996994	0.556665	-0.592166	-0.472848	-0.179244	-0.523058	NHP2P1	cyan
ENSG00000105993	-0.947123	-0.553269	0.294801	0.323565	0.685511	0.935854	-0.0743238	-0.449512	DNAJB6	greenyellow
ENSG00000105996	0.194284	-0.0484943	-0.758795	-0.0414857	0.151346	-0.269126	0.576178	-0.104513	HOXA2	blue
ENSG00000105997	0.739507	0.425168	-0.693875	-0.0542586	-0.392831	-0.789858	0.403348	0.0266891	HOXA3	blue
ENSG00000106003	-0.623696	-0.754511	-0.459368	-0.154365	0.858006	0.537481	0.607282	-0.0613397	LFNG	black
ENSG00000106009	0.512747	0.528735	-0.408991	0.316257	-0.41812	-0.548147	0.132172	-0.337733	BRAT1	blue
ENSG00000106028	0.26716	0.0267537	-0.635172	-0.0774516	0.0546561	-0.345856	0.531412	-0.0378268	SSBP1	blue
ENSG00000106049	-0.247662	-0.539549	-0.72944	-0.23248	0.64434	0.133207	0.789679	0.0304725	HIBADH	black
ENSG00000106052	-0.869729	-0.838403	0.242363	-0.251421	0.819327	0.858884	0.103161	0.163554	TAX1BP1	greenyellow
ENSG00000106070	-0.819262	-0.561382	0.604255	-0.013083	0.536383	0.855435	-0.27586	0.00412706	GRB10	greenyellow
ENSG00000002834	0.210088	-0.51986	-0.840981	-0.808393	0.436112	-0.295437	0.887846	0.706204	LASP1	darkgrey
ENSG00000106080	0.399462	0.00308203	-0.743936	-0.257755	0.0194179	-0.462944	0.55935	0.176522	FKBP14	blue
ENSG00000106089	-0.751554	-0.404147	0.725835	0.0956935	0.379583	0.797356	-0.42548	-0.0686531	STX1A	greenyellow
ENSG00000106105	-0.821061	-0.467704	0.698326	0.102215	0.457233	0.864745	-0.387935	-0.0968377	GARS	greenyellow
ENSG00000106144	0.844292	0.760416	-0.259517	0.158186	-0.766156	-0.83048	-0.0806291	-0.0731363	CASP2	blue
ENSG00000106153	0.628947	0.859474	0.0622882	0.504713	-0.796683	-0.601173	-0.338742	-0.405627	CHCHD2	cyan
ENSG00000106211	-0.716884	-0.959998	-0.364454	-0.412454	0.994665	0.635354	0.63497	0.220079	HSPB1	black
ENSG00000106245	-0.908392	-0.466103	0.634248	0.261527	0.513565	0.942872	-0.370739	-0.294463	BUD31	greenyellow
ENSG00000106261	-0.726724	-0.840433	0.0835447	-0.394754	0.804809	0.702847	0.258674	0.300332	ZKSCAN1	black
ENSG00000106263	0.680408	0.937448	0.351968	0.43969	-0.96275	-0.601282	-0.624588	-0.25575	EIF3B	cyan
ENSG00000106266	-0.849875	-0.364451	0.520682	0.40256	0.459562	0.87824	-0.340888	-0.450835	SNX8	greenyellow
ENSG00000106268	0.841086	0.894285	-0.0145066	0.283188	-0.901945	-0.811398	-0.282671	-0.146901	NUDT1	cyan
ENSG00000106299	-0.851423	-0.820422	0.197872	-0.226002	0.814674	0.838991	0.12839	0.143331	WASL	greenyellow
ENSG00000106305	-0.858982	-0.245982	0.624572	0.563983	0.364667	0.896192	-0.481647	-0.605537	AIMP2	greenyellow
ENSG00000106330	0.893464	0.3895	-0.373103	-0.469171	-0.534175	-0.893234	0.233221	0.584446	MOSPD3	blue
ENSG00000106333	0.868177	0.540772	-0.130303	-0.287129	-0.682281	-0.840336	-0.0315233	0.45163	PCOLCE	blue
ENSG00000106344	-0.0932495	0.510295	0.528228	0.769406	-0.388203	0.15121	-0.629518	-0.698435	RBM28	midnightblue
ENSG00000106348	0.859062	0.939107	0.036674	0.315266	-0.95193	-0.814551	-0.35397	-0.166968	IMPDH1	cyan
ENSG00000106355	0.873204	0.650808	-0.43953	0.0202691	-0.65671	-0.889815	0.14965	0.0234678	LSM5	blue
ENSG00000106366	0.242504	-0.393356	-0.395584	-0.836531	0.237696	-0.30053	0.596266	0.839129	SERPINE1	darkorange
ENSG00000106367	0.673298	0.546089	-0.317755	0.07788	-0.528321	-0.702711	0.117543	-0.0323854	AP1S1	blue
ENSG00000106392	0.420453	-0.126607	-0.244882	-0.725125	-0.0601694	-0.428281	0.291678	0.802673	C1GALT1	darkorange
ENSG00000106397	0.752342	0.933191	0.204717	0.387443	-0.947343	-0.686703	-0.499042	-0.225318	PLOD3	cyan
ENSG00000106399	0.764373	0.591722	-0.488562	0.0831195	-0.55756	-0.79567	0.187931	-0.0628237	RPA3	blue
ENSG00000156467	0.327158	-0.370102	-0.901435	-0.706866	0.314648	-0.422509	0.887767	0.598858	UQCRB	darkgrey
ENSG00000106404	-0.938678	-0.707081	0.235989	0.0720566	0.778943	0.918614	0.0393758	-0.198081	CLDN15	greenyellow
ENSG00000106459	-0.0825633	0.558603	0.566044	0.811104	-0.445186	0.163014	-0.739129	-0.753846	NRF1	midnightblue
ENSG00000106462	0.4679	0.935994	0.444849	0.696154	-0.893203	-0.383657	-0.74454	-0.550747	EZH2	cyan
ENSG00000106479	-0.815691	-0.739648	-0.00306649	-0.0507747	0.807846	0.778255	0.226549	-0.0842715	ZNF862	black
ENSG00000106484	0.71559	0.407519	-0.66454	-0.0687041	-0.38259	-0.773992	0.398213	0.0408929	MEST	blue
ENSG00000106554	-0.476683	-0.434442	0.34873	-0.204701	0.372903	0.493236	-0.106598	0.206626	CHCHD3	greenyellow
ENSG00000106588	0.846429	0.787542	-0.357889	0.246463	-0.745894	-0.850355	-0.00210328	-0.195052	PSMA2	blue
ENSG00000106591	0.596613	0.818055	0.0446311	0.478808	-0.767682	-0.559842	-0.356077	-0.397612	MRPL32	cyan
ENSG00000106603	0.660843	0.818509	-0.0422669	0.435091	-0.762892	-0.638775	-0.255196	-0.35157	COA1	cyan
ENSG00000106608	-0.617887	-0.292835	0.280077	0.260671	0.382647	0.630836	-0.179828	-0.363939	URGCP	greenyellow
ENSG00000106609	0.65568	0.685584	0.28295	0.0831517	-0.791043	-0.573225	-0.483637	0.121259	TMEM248	blue
ENSG00000106615	-0.80016	-0.235096	0.566725	0.519999	0.343539	0.835095	-0.445469	-0.557663	RHEB	greenyellow
ENSG00000106617	-0.903461	-0.46024	0.289999	0.408614	0.608078	0.896677	-0.13241	-0.534213	PRKAG2	greenyellow
ENSG00000106628	0.715694	0.872411	0.141505	0.376199	-0.881504	-0.655953	-0.442697	-0.231366	POLD2	cyan
ENSG00000106635	-0.90091	-0.38953	0.538952	0.422056	0.495965	0.926551	-0.346183	-0.48002	BCL7B	greenyellow
ENSG00000106636	-0.962852	-0.561247	0.392074	0.283325	0.66456	0.956257	-0.143313	-0.387904	YKT6	greenyellow
ENSG00000106665	-0.68899	-0.934391	-0.245043	-0.462766	0.932023	0.61091	0.560424	0.311676	CLIP2	black
ENSG00000106682	0.834502	0.873364	0.18612	0.174225	-0.953232	-0.761012	-0.463855	0.0202305	EIF4H	blue
ENSG00000106683	-0.65649	-0.371032	-0.0980656	0.380727	0.559742	0.60337	0.18108	-0.549438	LIMK1	greenyellow
ENSG00000106701	-0.762167	-0.477299	0.587563	0.0476481	0.458234	0.809066	-0.332934	-0.0547102	FSD1L	greenyellow
ENSG00000106780	-0.726796	-0.488432	-0.130663	0.287233	0.656626	0.676728	0.200646	-0.469419	MEGF9	black
ENSG00000106785	0.718019	0.848128	-0.165938	0.455982	-0.772904	-0.701825	-0.192211	-0.381468	TRIM14	blue
ENSG00000106799	0.181888	-0.0446304	0.34095	-0.486616	-0.153803	-0.123366	-0.188493	0.632048	TGFBR1	blue
ENSG00000106803	-0.883496	-0.647808	0.0352685	0.175908	0.780427	0.837116	0.172475	-0.339362	SEC61B	greenyellow
ENSG00000106853	0.83142	0.713063	0.0228315	-0.0160206	-0.811838	-0.77316	-0.267411	0.181623	PTGR1	blue
ENSG00000184162	-0.567411	0.038164	0.863266	0.515375	-0.0015548	0.643897	-0.730779	-0.439079	NR2C2AP	darkturquoise
ENSG00000106991	0.728188	0.93997	0.0555207	0.498291	-0.894276	-0.689281	-0.384578	-0.386432	ENG	cyan
ENSG00000106992	-0.921925	-0.799477	0.0215184	-0.00848341	0.887208	0.877788	0.237465	-0.144353	AK1	greenyellow
ENSG00000107020	0.313226	0.713211	0.496634	0.524125	-0.69241	-0.246125	-0.643925	-0.384516	PLGRKT	cyan
ENSG00000107021	-0.274549	-0.423287	-0.502587	-0.0956744	0.505269	0.215746	0.475195	-0.0754483	TBC1D13	black
ENSG00000107140	-0.774473	-0.814476	0.134295	-0.297805	0.792908	0.760488	0.176989	0.210767	TESK1	greenyellow
ENSG00000107175	-0.908193	-0.602397	0.533916	0.0779019	0.625462	0.924352	-0.205832	-0.120554	CREB3	greenyellow
ENSG00000173166	-0.416909	0.113273	0.86283	0.425452	-0.106102	0.493869	-0.706307	-0.329008	RAPH1	darkturquoise
ENSG00000107201	0.185742	0.147366	0.482812	-0.231584	-0.302548	-0.128206	-0.350827	0.407996	DDX58	blue
ENSG00000107223	-0.937882	-0.786003	0.331634	-0.102867	0.798933	0.931016	0.0103397	0.0148047	EDF1	greenyellow
ENSG00000139644	-0.0334457	0.49872	0.86059	0.522485	-0.523993	0.15297	-0.911996	-0.347374	TMBIM6	darkturquoise
ENSG00000107263	-0.909908	-0.823133	-0.0532861	-0.0378582	0.919891	0.858	0.312517	-0.145286	RAPGEF1	black
ENSG00000107281	-0.660428	-0.880245	-0.279407	-0.396323	0.902332	0.586981	0.562762	0.239813	NPDC1	black
ENSG00000107290	-0.922734	-0.674371	0.312291	0.0646882	0.736919	0.903413	-0.00464727	-0.179478	SETX	greenyellow
ENSG00000168028	0.186526	-0.500284	-0.83015	-0.751632	0.435519	-0.28117	0.886956	0.619974	RPSA	darkgrey
ENSG00000141401	-0.0173225	-0.480577	-0.887417	-0.393283	0.542433	-0.0945941	0.886332	0.204891	IMPA2	darkgrey
ENSG00000107338	0.743888	0.907796	0.192953	0.364734	-0.921421	-0.679636	-0.470886	-0.193925	SHB	cyan
ENSG00000107341	0.0540564	-0.401822	-0.288264	-0.635649	0.278756	-0.0609846	0.357768	0.611557	UBE2R2	darkorange
ENSG00000107371	0.675251	0.952845	0.302809	0.481529	-0.953108	-0.605638	-0.596573	-0.315406	EXOSC3	cyan
ENSG00000107372	-0.878423	-0.833774	0.14709	-0.189162	0.8496	0.858797	0.160464	0.0727566	ZFAND5	greenyellow
ENSG00000107404	-0.964828	-0.799018	0.18312	-0.0178336	0.858999	0.942936	0.107029	-0.106795	DVL1	greenyellow
ENSG00000107438	-0.424946	-0.772536	-0.387024	-0.506688	0.751842	0.354221	0.598442	0.376866	PDLIM1	black
ENSG00000107521	-0.586329	-0.941365	-0.307254	-0.599339	0.899721	0.520411	0.592553	0.451573	HPS1	black
ENSG00000107537	0.281906	-0.502308	-0.695982	-0.948573	0.35748	-0.352671	0.810863	0.895012	PHYH	darkorange
ENSG00000107551	0.612347	-0.0179387	-0.453499	-0.722741	-0.145461	-0.646525	0.461026	0.770909	RASSF4	blue
ENSG00000107554	0.729658	0.703125	-0.320803	0.258875	-0.660423	-0.722887	-0.0408321	-0.220437	DNMBP	blue
ENSG00000107566	0.767619	0.622846	-0.0961565	-0.0277785	-0.697509	-0.725822	-0.156981	0.145116	ERLIN1	blue
ENSG00000107581	-0.981753	-0.673432	0.292394	0.168371	0.763273	0.97544	-0.0452906	-0.290059	EIF3A	greenyellow
ENSG00000107611	0.889811	0.631549	-0.00205471	-0.228684	-0.777575	-0.850474	-0.150501	0.408504	CUBN	blue
ENSG00000107625	0.739947	0.402299	-0.0424285	-0.381138	-0.574864	-0.696191	-0.0776399	0.543633	DDX50	blue
ENSG00000107643	-0.788572	-0.698259	0.140145	-0.102878	0.726765	0.768445	0.111382	-0.0134316	MAPK8	black
ENSG00000107651	-0.637009	-0.228053	0.291383	0.41381	0.355915	0.620991	-0.147058	-0.493739	SEC23IP	greenyellow
ENSG00000107669	-0.600731	-0.324985	-0.0191288	0.312904	0.477147	0.567371	0.0743536	-0.463719	ATE1	greenyellow
ENSG00000107679	-0.315983	-0.735342	-0.436158	-0.580904	0.6973	0.230509	0.667945	0.472973	PLEKHA1	black
ENSG00000107719	0.681839	0.941011	0.0253843	0.580842	-0.866007	-0.646109	-0.379486	-0.487091	PALD1	cyan
ENSG00000107731	-0.920987	-0.638114	0.521416	0.0385369	0.647518	0.945422	-0.215396	-0.0889273	UNC5B	greenyellow
ENSG00000107738	0.32008	0.116839	-0.724453	0.0512621	-0.0112379	-0.395567	0.507557	-0.167695	C10orf54	blue
ENSG00000165716	0.121193	-0.466624	-0.877382	-0.572059	0.464239	-0.223809	0.886223	0.427784	FAM69B	darkgrey
ENSG00000107758	0.90357	0.639226	-0.333461	-0.0927361	-0.691245	-0.896081	0.0666467	0.186208	PPP3CB	blue
ENSG00000107771	-0.889557	-0.704648	0.439361	-0.0817075	0.694836	0.899856	-0.107123	0.026674	CCSER2	greenyellow
ENSG00000107798	0.991475	0.669908	-0.258037	-0.2024	-0.778156	-0.974111	0.0109211	0.336941	LIPA	blue
ENSG00000128342	-0.131918	0.275201	0.860175	0.288295	-0.333992	0.21876	-0.732753	-0.1131	LIF	darkturquoise
ENSG00000107816	0.238901	-0.539623	-0.779021	-0.913969	0.417925	-0.325362	0.876899	0.839996	LZTS2	darkorange
ENSG00000107829	-0.798792	-0.863085	0.0421365	-0.299207	0.862161	0.769765	0.283076	0.188479	FBXW4	greenyellow
ENSG00000107833	-0.2398	0.348925	0.388442	0.7665	-0.193617	0.2692	-0.494252	-0.741507	NPM3	midnightblue
ENSG00000107854	-0.839235	-0.796722	0.217565	-0.220027	0.78527	0.835381	0.0840266	0.126339	TNKS2	greenyellow
ENSG00000107862	-0.820039	-0.69491	-0.160926	0.0955441	0.832458	0.760647	0.328584	-0.290847	GBF1	black
ENSG00000107882	0.554494	0.451696	-0.557461	0.183821	-0.369228	-0.583751	0.214571	-0.233479	SUFU	blue
ENSG00000107897	0.735504	0.261271	-0.201992	-0.535082	-0.446917	-0.716507	0.113439	0.661392	ACBD5	blue
ENSG00000107929	-0.738304	-0.160002	0.627963	0.533502	0.253192	0.790494	-0.523971	-0.546691	LARP4B	greenyellow
ENSG00000107937	0.0787222	0.715374	0.753737	0.764675	-0.669169	0.026699	-0.914223	-0.610608	GTPBP4	cyan
ENSG00000107938	0.81199	0.450242	-0.483721	-0.220225	-0.498126	-0.845182	0.28575	0.253556	EDRF1	blue
ENSG00000107949	0.854909	0.910396	0.0386485	0.270221	-0.939594	-0.804241	-0.359152	-0.119239	BCCIP	blue
ENSG00000107957	-0.912602	-0.888698	0.00165432	-0.170254	0.939048	0.871645	0.290152	0.00991377	SH3PXD2A	black
ENSG00000107959	0.824519	0.70527	-0.00486094	-0.00771813	-0.792785	-0.77925	-0.215912	0.150201	PITRM1	blue
ENSG00000107960	0.57668	0.195142	-0.296343	-0.378768	-0.287183	-0.611099	0.288115	0.426886	OBFC1	blue
ENSG00000107968	0.775682	0.404918	-0.15505	-0.379275	-0.551813	-0.768197	0.0653534	0.510242	MAP3K8	blue
ENSG00000107984	0.343184	0.121383	-0.771602	0.0324689	-0.00877357	-0.4214	0.542448	-0.176622	DKK1	blue
ENSG00000108039	0.790126	0.480989	-0.0222976	-0.326361	-0.648432	-0.754582	-0.0947711	0.485641	XPNPEP1	blue
ENSG00000108055	0.512762	0.854507	0.396946	0.513035	-0.857054	-0.419814	-0.690822	-0.358109	SMC3	cyan
ENSG00000108064	0.862963	0.916871	-0.0449644	0.30075	-0.92108	-0.826998	-0.298405	-0.17359	TFAM	cyan
ENSG00000108091	-0.454307	-0.900532	-0.452026	-0.655168	0.858823	0.388342	0.691328	0.497864	CCDC6	black
ENSG00000108094	0.578102	0.869174	0.228415	0.523158	-0.8381	-0.517703	-0.514713	-0.389705	CUL2	cyan
ENSG00000108100	-0.931618	-0.635022	0.3339	0.146107	0.705135	0.934817	-0.092257	-0.2432	CCNY	greenyellow
ENSG00000108106	0.523194	0.932678	0.422839	0.619357	-0.897591	-0.453867	-0.667511	-0.4665	UBE2S	cyan
ENSG00000108107	-0.892958	-0.914096	0.0016515	-0.237503	0.948938	0.843353	0.333912	0.0883823	RPL28	black
ENSG00000108175	-0.94426	-0.756658	0.272399	-0.015869	0.798556	0.928522	0.0357806	-0.0883523	ZMIZ1	greenyellow
ENSG00000120053	-0.665256	-0.0644846	0.860077	0.489435	0.106421	0.73384	-0.677538	-0.430545	GOT1	darkturquoise
ENSG00000108262	-0.836846	-0.853319	0.0680682	-0.241036	0.863355	0.803134	0.244286	0.124532	GIT1	black
ENSG00000108298	-0.781217	-0.196574	0.730068	0.497404	0.267559	0.843772	-0.577307	-0.485347	RPL19	greenyellow
ENSG00000108306	-0.819512	-0.83212	-0.153145	-0.132272	0.911549	0.758457	0.411083	-0.0544584	FBXL20	black
ENSG00000108342	0.283272	0.451639	0.418124	0.172606	-0.49645	-0.246427	-0.394738	-0.029523	CSF3	blue
ENSG00000108344	-0.390708	0.351355	0.527668	0.925164	-0.169282	0.438204	-0.637069	-0.935322	PSMD3	midnightblue
ENSG00000108349	-0.489992	-0.683492	-0.269833	-0.317753	0.690109	0.445377	0.421384	0.201018	CASC3	black
ENSG00000108352	0.787799	0.720019	-0.201097	0.159331	-0.727516	-0.784578	-0.0685568	-0.0733907	RAPGEFL1	blue
ENSG00000108384	0.668783	0.897699	0.0303431	0.525947	-0.837487	-0.628436	-0.379359	-0.418643	RAD51C	cyan
ENSG00000108406	0.746851	0.150819	-0.368419	-0.671515	-0.336206	-0.75019	0.303976	0.76546	DHX40	blue
ENSG00000108424	-0.0725102	0.578729	0.689201	0.782677	-0.502942	0.167286	-0.845903	-0.663652	KPNB1	midnightblue
ENSG00000108433	-0.854799	-0.561981	0.338994	0.158882	0.622101	0.851004	-0.106936	-0.243589	GOSR2	greenyellow
ENSG00000108448	-0.663891	-0.346757	0.550892	0.138684	0.35916	0.697252	-0.313588	-0.149528	TRIM16L	greenyellow
ENSG00000108465	-0.361355	-0.777698	-0.533592	-0.548776	0.772939	0.267961	0.749098	0.368601	CDK5RAP3	black
ENSG00000108468	0.813282	0.842222	-0.117218	0.286394	-0.839221	-0.772857	-0.247482	-0.188129	CBX1	blue
ENSG00000108479	0.878753	0.371808	-0.623426	-0.379848	-0.442065	-0.914506	0.425658	0.41084	GALK1	blue
ENSG00000108509	-0.853941	-0.708917	0.274575	-0.0661359	0.728446	0.847813	0.0132817	-0.0118303	CAMTA2	greenyellow
ENSG00000108510	-0.697062	-0.595962	0.157149	-0.0602132	0.621119	0.698401	0.0431763	-0.0452781	MED13	black
ENSG00000108511	0.889622	0.759168	-0.316385	0.118278	-0.766882	-0.882499	-0.0307734	-0.0323573	HOXB6	blue
ENSG00000105778	-0.238836	0.200313	0.857758	0.307648	-0.24933	0.333836	-0.762574	-0.177518	AVL9	darkturquoise
ENSG00000108518	0.348493	0.887054	0.638672	0.711104	-0.85476	-0.250986	-0.849894	-0.52855	PFN1	cyan
ENSG00000108523	-0.727054	-0.929242	-0.121075	-0.452178	0.90935	0.674216	0.44251	0.312093	RNF167	black
ENSG00000108551	-0.872707	-0.612611	0.377926	0.0810014	0.669043	0.86999	-0.0591335	-0.160669	RASD1	greenyellow
ENSG00000108559	0.129156	0.671639	0.455388	0.751511	-0.588107	-0.0542274	-0.695243	-0.654252	NUP88	midnightblue
ENSG00000108561	0.673822	0.950094	0.0683463	0.588533	-0.883036	-0.630876	-0.428166	-0.488016	C1QBP	cyan
ENSG00000108582	-0.759819	-0.361731	0.468837	0.283068	0.437169	0.774834	-0.260688	-0.350772	CPD	greenyellow
ENSG00000108588	0.965506	0.706124	-0.147538	-0.154365	-0.818806	-0.934768	-0.0942612	0.312061	CCDC47	blue
ENSG00000108590	0.75559	0.464093	-0.538088	-0.0917565	-0.468737	-0.796522	0.290626	0.108691	MED31	blue
ENSG00000108604	0.738784	0.959726	0.0599759	0.512543	-0.913904	-0.697366	-0.405981	-0.391386	SMARCD2	cyan
ENSG00000108639	-0.893831	-0.699666	0.0274662	0.112494	0.821864	0.843466	0.213039	-0.279006	SYNGR2	greenyellow
ENSG00000108641	0.893322	0.494464	-0.457053	-0.273288	-0.567803	-0.916994	0.256327	0.336226	B9D1	blue
ENSG00000108651	-0.786067	-0.437345	0.337761	0.24983	0.521414	0.796142	-0.174119	-0.337321	UTP6	greenyellow
ENSG00000108654	-0.524447	0.219281	0.630277	0.861743	-0.0573689	0.578524	-0.656533	-0.86135	DDX5	greenyellow
ENSG00000161179	-0.213961	0.492943	0.851561	0.776371	-0.426669	0.303029	-0.89333	-0.656091	YDJC	darkturquoise
ENSG00000108679	0.939415	0.422626	-0.590566	-0.396254	-0.518492	-0.964237	0.359402	0.453034	LGALS3BP	blue
ENSG00000108733	-0.803627	-0.463238	0.0891995	0.343878	0.619758	0.775038	0.0353163	-0.505662	PEX12	greenyellow
ENSG00000108774	-0.594924	0.130438	0.673629	0.794885	0.00895024	0.657059	-0.678264	-0.789439	RAB5C	greenyellow
ENSG00000108784	-0.92301	-0.70483	0.266372	0.0417369	0.76541	0.910722	0.0241457	-0.157124	NAGLU	greenyellow
ENSG00000108786	0.921516	0.545373	-0.25829	-0.307706	-0.677214	-0.900598	0.0511153	0.43192	HSD17B1	blue
ENSG00000108788	0.80237	0.881678	0.0468457	0.29638	-0.896431	-0.757845	-0.337756	-0.149904	MLX	cyan
ENSG00000108797	0.659117	-0.0401739	-0.520005	-0.79655	-0.132381	-0.70236	0.541395	0.847902	CNTNAP1	darkorange
ENSG00000108799	-0.293038	-0.60325	0.146161	-0.651471	0.443386	0.298537	0.161836	0.676959	EZH1	black
ENSG00000108813	0.681343	0.659192	-0.156828	0.189104	-0.657992	-0.672773	-0.114887	-0.0823995	DLX4	blue
ENSG00000108819	0.778886	0.917855	0.199357	0.318625	-0.955868	-0.711426	-0.498386	-0.152176	PPP1R9B	cyan
ENSG00000108828	-0.817561	-0.919337	0.0960297	-0.398198	0.883485	0.791037	0.257607	0.300745	VAT1	greenyellow
ENSG00000108829	-0.677208	-0.0251589	0.363674	0.782715	0.232624	0.683413	-0.354183	-0.873654	LRRC59	greenyellow
ENSG00000108840	-0.729353	-0.975155	-0.26346	-0.460077	0.979759	0.661652	0.567062	0.295904	HDAC5	black
ENSG00000108848	0.689922	-0.0263801	-0.711082	-0.732948	-0.107071	-0.741593	0.640827	0.742836	LUC7L3	blue
ENSG00000108852	0.889909	0.924146	-0.00758256	0.264331	-0.949951	-0.845201	-0.326251	-0.116908	MPP2	cyan
ENSG00000108854	0.571865	0.576948	-0.320354	0.274803	-0.491537	-0.595287	0.08205	-0.275801	SMURF2	blue
ENSG00000108861	-0.387932	-0.913904	-0.382714	-0.805443	0.815128	0.323523	0.673881	0.6908	DUSP3	black
ENSG00000108883	0.200544	0.661583	0.287674	0.69988	-0.560454	-0.145313	-0.530555	-0.667089	EFTUD2	cyan
ENSG00000108946	-0.835273	-0.739513	0.234625	-0.132537	0.744601	0.838583	0.0339631	0.0459362	PRKAR1A	greenyellow
ENSG00000230837	0.0057605	-0.639563	-0.702782	-0.771002	0.578762	-0.103662	0.886099	0.644928	RPL31P2	darkgrey
ENSG00000108960	0.727114	0.7376	-0.0127106	0.194685	-0.769118	-0.682262	-0.270538	-0.076804	MMD	blue
ENSG00000109016	0.416906	0.812127	0.133872	0.697423	-0.707989	-0.387315	-0.447854	-0.631332	DHRS7B	cyan
ENSG00000109046	0.75756	0.422707	0.0618458	-0.412644	-0.620882	-0.706084	-0.139882	0.5961	WSB1	blue
ENSG00000109062	-0.167908	0.528773	0.515398	0.907	-0.378791	0.222709	-0.678401	-0.870679	SLC9A3R1	midnightblue
ENSG00000109065	-0.942279	-0.638871	0.169654	0.223016	0.764498	0.912199	0.0547488	-0.371312	NAT9	greenyellow
ENSG00000109079	-0.814874	-0.876116	0.0849467	-0.322707	0.862966	0.784089	0.261339	0.200186	TNFAIP1	black
ENSG00000109083	-0.665064	-0.95024	-0.320426	-0.491668	0.954784	0.589453	0.619367	0.311886	IFT20	black
ENSG00000109084	0.724433	0.939752	0.208434	0.434777	-0.946533	-0.659857	-0.525134	-0.286533	TMEM97	cyan
ENSG00000109089	-0.964397	-0.792424	0.0994162	0.0259537	0.880935	0.929498	0.169786	-0.184154	CDR2L	greenyellow
ENSG00000109103	0.625255	0.541534	0.248939	-0.102969	-0.678167	-0.569426	-0.338813	0.297014	UNC119	blue
ENSG00000109107	0.920672	0.620257	-0.072947	-0.261587	-0.772049	-0.880662	-0.11656	0.435275	ALDOC	blue
ENSG00000109133	-0.378856	0.351658	0.629444	0.860633	-0.203596	0.42496	-0.683204	-0.837335	TMEM33	midnightblue
ENSG00000109171	-0.805797	-0.509616	0.287632	0.194594	0.582852	0.813228	-0.122412	-0.281185	SLAIN2	greenyellow
ENSG00000109255	0.827102	0.898673	0.0173452	0.301704	-0.915347	-0.785372	-0.339527	-0.160273	NMU	cyan
ENSG00000105771	-0.145275	0.324057	0.850207	0.406099	-0.360357	0.244998	-0.789194	-0.242216	SMG9	darkturquoise
ENSG00000109323	0.442088	0.0392836	0.0919273	-0.617113	-0.25798	-0.397989	-0.023845	0.765077	MANBA	blue
ENSG00000109332	-0.799904	-0.45223	0.33703	0.271409	0.537777	0.817434	-0.174859	-0.341462	UBE2D3	greenyellow
ENSG00000109390	0.892938	0.589294	-0.444854	-0.119175	-0.631545	-0.900087	0.158447	0.192324	NDUFC1	blue
ENSG00000109466	-0.846697	-0.806398	0.000390302	-0.120076	0.859533	0.809663	0.257406	-0.0148356	KLHL2	greenyellow
ENSG00000241741	-0.135531	-0.614312	-0.754489	-0.497539	0.64494	0.0196698	0.885753	0.32311	RPL7AP30	darkgrey
ENSG00000109501	-0.349529	0.328326	0.61363	0.783744	-0.203299	0.400292	-0.668221	-0.756877	WFS1	greenyellow
ENSG00000109519	0.790915	0.908758	0.275961	0.25765	-0.975678	-0.717155	-0.533898	-0.0638394	GRPEL1	cyan
ENSG00000109534	0.211025	0.607563	0.0648779	0.667727	-0.463455	-0.184587	-0.348505	-0.667984	GAR1	cyan
ENSG00000109572	-0.825392	-0.874126	-0.0805838	-0.23766	0.909979	0.78016	0.344796	0.0775897	CLCN3	black
ENSG00000109576	0.340244	0.778948	0.596102	0.557419	-0.779524	-0.244622	-0.788109	-0.388513	AADAT	cyan
ENSG00000109606	0.765661	0.936538	0.0112319	0.452486	-0.907964	-0.723937	-0.375371	-0.339248	DHX15	cyan
ENSG00000109654	-0.807917	-0.582786	0.229985	0.0970172	0.641691	0.809283	-0.0352255	-0.211934	TRIM2	greenyellow
ENSG00000109674	0.886749	0.926011	0.0155571	0.26358	-0.95297	-0.839433	-0.335188	-0.112904	NEIL3	cyan
ENSG00000109680	-0.47833	-0.663013	-0.233335	-0.337288	0.661006	0.434084	0.377958	0.208158	TBC1D19	black
ENSG00000109685	0.431264	0.816786	0.372893	0.565767	-0.780742	-0.366306	-0.617095	-0.452824	WHSC1	cyan
ENSG00000109686	-0.861591	-0.641526	0.29751	0.0371382	0.691134	0.856561	-0.029491	-0.126454	SH3D19	greenyellow
ENSG00000109736	0.0862856	-0.370098	0.0267368	-0.746148	0.16729	-0.0915232	0.226327	0.829021	MFSD10	darkorange
ENSG00000109756	-0.931993	-0.73892	0.286714	-0.0133237	0.783086	0.91577	0.0312625	-0.092834	RAPGEF2	greenyellow
ENSG00000109787	-0.859866	-0.924026	-0.120705	-0.252146	0.96853	0.803345	0.409518	0.0793891	KLF3	black
ENSG00000109790	-0.788263	-0.468345	0.166127	0.278757	0.596251	0.763192	-0.00259683	-0.416355	KLHL5	greenyellow
ENSG00000109805	0.854544	0.94648	0.102543	0.300688	-0.976573	-0.80058	-0.416976	-0.14013	NCAPG	cyan
ENSG00000109814	-0.323483	-0.69375	-0.149735	-0.639879	0.595552	0.289625	0.418122	0.546951	UGDH	black
ENSG00000109854	-0.921737	-0.842177	0.139603	-0.131942	0.87514	0.898362	0.166768	0.0139861	HTATIP2	greenyellow
ENSG00000109861	0.867545	0.858152	-0.0966393	0.223027	-0.867342	-0.848716	-0.191025	-0.105074	CTSC	blue
ENSG00000109881	0.946284	0.737151	-0.269711	-0.0162558	-0.794337	-0.92624	-0.0409739	0.126852	CCDC34	blue
ENSG00000109911	0.72697	0.521775	-0.523013	0.039526	-0.500347	-0.745251	0.190595	-0.0429617	ELP4	blue
ENSG00000109917	-0.901107	-0.426726	0.59101	0.338116	0.50297	0.925107	-0.34308	-0.392371	ZPR1	greenyellow
ENSG00000109919	0.583124	0.877999	0.422063	0.446859	-0.900716	-0.495322	-0.667846	-0.259913	MTCH2	cyan
ENSG00000109971	-0.782563	-0.106826	0.529753	0.726675	0.276717	0.808136	-0.465029	-0.787526	HSPA8	greenyellow
ENSG00000110013	0.744409	0.278718	-0.495885	-0.40734	-0.367938	-0.771133	0.343801	0.434794	SIAE	blue
ENSG00000110025	-0.833446	-0.780024	0.0778571	-0.140505	0.824748	0.798495	0.2136	0.0123425	SNX15	black
ENSG00000110031	0.233723	0.66776	0.653399	0.494815	-0.675921	-0.153606	-0.731985	-0.325351	LPXN	cyan
ENSG00000110046	-0.839608	-0.758641	0.0775886	-0.0964501	0.815141	0.80321	0.202534	-0.0464524	ATG2A	black
ENSG00000110047	-0.352849	-0.256426	0.112615	0.0356737	0.297176	0.318506	0.0845928	-0.0928438	EHD1	black
ENSG00000110048	-0.883896	-0.758592	0.104681	-0.024083	0.829288	0.850646	0.18143	-0.0949352	OSBP	greenyellow
ENSG00000110057	0.665794	0.0400531	-0.600362	-0.637183	-0.166721	-0.697099	0.493426	0.675691	UNC93B1	blue
ENSG00000110075	0.21163	0.412693	-0.252528	0.484861	-0.257431	-0.22586	0.00264548	-0.542076	PPP6R3	blue
ENSG00000110090	-0.873512	-0.704718	0.0368841	0.0726216	0.802256	0.844535	0.161496	-0.231346	CPT1A	greenyellow
ENSG00000110092	0.658894	0.874874	0.330874	0.365481	-0.902271	-0.598581	-0.54086	-0.19136	CCND1	cyan
ENSG00000110104	-0.213665	0.56226	0.699886	0.947256	-0.426484	0.290624	-0.840503	-0.881816	CCDC86	midnightblue
ENSG00000110108	0.611899	0.632718	-0.43021	0.356025	-0.530562	-0.626684	0.0577233	-0.366064	TMEM109	blue
ENSG00000110172	0.0409905	0.672463	0.676487	0.771161	-0.60159	0.0433831	-0.837197	-0.643818	CHORDC1	midnightblue
ENSG00000110200	0.480678	0.676387	-0.171088	0.501792	-0.561759	-0.474205	-0.147411	-0.495876	ANAPC15	cyan
ENSG00000160803	-0.547978	0.130931	0.849802	0.643938	-0.0620622	0.627565	-0.780351	-0.584567	UBQLN4	darkturquoise
ENSG00000110274	-0.758922	-0.732957	0.252819	-0.233871	0.703798	0.756314	0.0576491	0.178033	CEP164	greenyellow
ENSG00000110328	0.846021	0.762763	0.166974	-0.0206126	-0.882417	-0.782686	-0.36112	0.217672	GALNT18	blue
ENSG00000110367	-0.238067	-0.649278	-0.675766	-0.462686	0.680573	0.145796	0.767487	0.269485	DDX6	black
ENSG00000110395	-0.948677	-0.620725	0.234835	0.230375	0.735774	0.935296	-0.0201209	-0.373695	CBL	greenyellow
ENSG00000110422	-0.563199	-0.880025	-0.211787	-0.565963	0.833758	0.49516	0.537784	0.44296	HIPK3	black
ENSG00000110435	0.664274	0.460962	-0.599378	0.0759706	-0.402144	-0.705398	0.312805	-0.1006	PDHX	blue
ENSG00000110536	0.733084	0.860849	-0.121813	0.434132	-0.807444	-0.711969	-0.240076	-0.358118	PTPMT1	cyan
ENSG00000110651	0.760569	0.143755	-0.753067	-0.53837	-0.22344	-0.819987	0.602837	0.542562	CD81	blue
ENSG00000140859	-0.227965	0.268758	0.849744	0.417376	-0.302524	0.325157	-0.810693	-0.272096	KIFC3	darkturquoise
ENSG00000129315	-0.137346	0.464791	0.846127	0.611419	-0.445628	0.231607	-0.864635	-0.48527	CCNT1	darkturquoise
ENSG00000110700	-0.261316	-0.588625	0.0629151	-0.6494	0.44772	0.245318	0.246122	0.642417	RPS13	black
ENSG00000110713	-0.323357	0.353766	0.647414	0.783332	-0.238411	0.381709	-0.698882	-0.75851	NUP98	greenyellow
ENSG00000110717	-0.249763	0.398541	0.383272	0.868548	-0.222904	0.283072	-0.526019	-0.861871	NDUFS8	midnightblue
ENSG00000110719	0.424466	-0.162677	-0.750028	-0.55517	0.113123	-0.51645	0.736173	0.505885	TCIRG1	blue
ENSG00000110723	-0.687189	-0.389323	0.665194	0.0596823	0.358378	0.744286	-0.393301	-0.0440875	EXPH5	greenyellow
ENSG00000110756	0.823341	0.731635	-0.00380911	0.0480167	-0.806347	-0.782829	-0.2302	0.113944	HPS5	blue
ENSG00000110801	-0.838355	-0.378091	0.396766	0.414392	0.501835	0.83997	-0.214246	-0.488402	PSMD9	greenyellow
ENSG00000110811	0.824557	0.375439	-0.709551	-0.260778	-0.397223	-0.878471	0.473702	0.2616	P3H3	blue
ENSG00000110841	-0.611106	-0.87757	-0.165455	-0.503487	0.846062	0.557429	0.493264	0.387055	PPFIBP1	black
ENSG00000110851	-0.892299	-0.641348	0.412472	0.0384403	0.670599	0.90743	-0.125887	-0.109923	PRDM4	greenyellow
ENSG00000110852	0.616188	-0.0336473	-0.346043	-0.802583	-0.170885	-0.631467	0.382717	0.889628	CLEC2B	darkorange
ENSG00000110881	0.91591	0.63305	-0.362032	-0.111294	-0.688575	-0.919486	0.100711	0.211277	ASIC1	blue
ENSG00000110888	0.545914	0.572529	0.449508	-0.0205423	-0.707152	-0.474074	-0.484261	0.236353	CAPRIN2	blue
ENSG00000110906	-0.407041	-0.194661	0.531229	0.0235086	0.153387	0.451158	-0.339282	0.0145076	KCTD10	greenyellow
ENSG00000110917	0.881269	0.454377	-0.50424	-0.291392	-0.523228	-0.908986	0.318123	0.344674	MLEC	blue
ENSG00000110921	-0.915586	-0.73332	0.0839078	0.0685071	0.826887	0.886832	0.148816	-0.214513	MVK	greenyellow
ENSG00000110931	-0.627297	-0.665042	-0.318297	-0.0666804	0.764622	0.557861	0.451606	-0.122517	CAMKK2	black
ENSG00000110955	0.633424	0.897617	-0.0365038	0.604439	-0.805907	-0.60374	-0.344141	-0.53494	ATP5B	cyan
ENSG00000110958	0.857957	0.945431	0.0797862	0.303391	-0.972056	-0.804721	-0.403365	-0.151352	PTGES3	cyan
ENSG00000196305	-0.268739	0.326011	0.845589	0.565723	-0.300205	0.355841	-0.799793	-0.462846	IARS	darkturquoise
ENSG00000111057	0.670102	0.972611	0.362311	0.502185	-0.979463	-0.593424	-0.649114	-0.31964	KRT18	cyan
ENSG00000111142	0.249495	0.458422	0.171293	0.323361	-0.439171	-0.187003	-0.387129	-0.2638	METAP2	cyan
ENSG00000111144	0.305005	-0.403279	-0.465752	-0.918992	0.214952	-0.335138	0.562536	0.928795	LTA4H	darkorange
ENSG00000111145	0.600466	0.804862	0.450258	0.286544	-0.872049	-0.520323	-0.615385	-0.0831818	ELK3	cyan
ENSG00000111196	0.644136	0.90505	0.244474	0.474856	-0.892762	-0.583797	-0.532171	-0.333569	MAGOHB	cyan
ENSG00000111206	0.690631	0.961492	0.353153	0.457342	-0.978897	-0.617252	-0.623747	-0.276165	FOXM1	cyan
ENSG00000111231	0.650906	0.855062	0.351464	0.338544	-0.89265	-0.582212	-0.561879	-0.158663	GPN3	cyan
ENSG00000111247	0.86085	0.927031	0.0803079	0.271915	-0.961335	-0.806319	-0.391447	-0.103595	RAD51AP1	cyan
ENSG00000152795	0.0549579	0.625561	0.845555	0.603149	-0.630278	0.0517614	-0.920663	-0.431886	HNRNPDL	darkturquoise
ENSG00000111269	-0.363522	-0.841885	-0.547741	-0.656096	0.811163	0.278085	0.757154	0.488362	CREBL2	black
ENSG00000111276	-0.41441	-0.806426	-0.63123	-0.486862	0.840165	0.316988	0.79475	0.286945	CDKN1B	black
ENSG00000111319	0.879076	0.815206	0.0156236	0.0855931	-0.882017	-0.838372	-0.264716	0.0847645	SCNN1A	blue
ENSG00000154133	-0.140993	0.225922	0.84367	0.217685	-0.303532	0.223469	-0.710918	-0.0565611	ROBO4	darkturquoise
ENSG00000111328	0.985008	0.671429	-0.325733	-0.158054	-0.755865	-0.977558	0.0651218	0.273256	CDK2AP1	blue
ENSG00000111358	0.637534	0.659933	-0.150924	0.227747	-0.63175	-0.633309	-0.104996	-0.18032	GTF2H3	blue
ENSG00000111364	0.444731	0.539357	0.471869	0.0662393	-0.653767	-0.35905	-0.545338	0.132192	DDX55	blue
ENSG00000153132	-0.507071	-0.0677724	0.843663	0.253261	0.0291002	0.601768	-0.692815	-0.163298	CLGN	darkturquoise
ENSG00000111412	-0.63289	-0.0356373	0.679206	0.575332	0.126426	0.678271	-0.547673	-0.561692	C12orf49	greenyellow
ENSG00000111445	0.83342	0.909499	0.103626	0.273542	-0.949087	-0.778753	-0.406154	-0.114016	RFC5	cyan
ENSG00000111540	-0.743841	-0.950191	-0.24858	-0.403159	0.967203	0.681551	0.532145	0.236333	RAB5B	black
ENSG00000111581	0.880189	0.881989	-0.0671819	0.234896	-0.899635	-0.843789	-0.247541	-0.108992	NUP107	blue
ENSG00000111602	0.672367	0.949527	0.248149	0.51446	-0.935156	-0.60095	-0.564076	-0.361715	TIMELESS	cyan
ENSG00000111615	0.288077	0.648699	0.665682	0.37649	-0.698921	-0.188727	-0.764206	-0.186183	KRR1	cyan
ENSG00000111639	0.458269	0.660976	-0.0738318	0.488225	-0.584063	-0.425545	-0.262601	-0.442505	MRPL51	cyan
ENSG00000111640	0.93365	0.82165	-0.000527017	0.0216859	-0.913268	-0.887775	-0.265744	0.148445	GAPDH	blue
ENSG00000111641	-0.39696	0.372932	0.724518	0.891656	-0.229761	0.465238	-0.76432	-0.856746	NOP2	midnightblue
ENSG00000111647	-0.743809	-0.356077	0.386013	0.301255	0.443509	0.762748	-0.234991	-0.393406	UHRF1BP1L	greenyellow
ENSG00000171503	0.181367	-0.378512	-0.916394	-0.506175	0.396313	-0.287999	0.884574	0.358355	ETFDH	darkgrey
ENSG00000111664	0.888024	0.587029	-0.537579	-0.073286	-0.599684	-0.913916	0.235621	0.117474	GNB3	blue
ENSG00000111665	0.779502	0.939118	0.197888	0.362018	-0.960635	-0.72355	-0.473744	-0.192522	CDCA3	cyan
ENSG00000111666	0.690917	0.744607	-0.106867	0.285251	-0.721755	-0.673573	-0.190977	-0.207753	CHPT1	blue
ENSG00000111667	0.478826	0.76596	0.503589	0.368014	-0.813884	-0.387586	-0.691213	-0.171394	USP5	cyan
ENSG00000111669	0.935813	0.80376	-0.00960269	-0.00260342	-0.902799	-0.885136	-0.258304	0.17893	TPI1	blue
ENSG00000111670	-0.661936	-0.811593	-0.368834	-0.239276	0.882224	0.58258	0.572065	0.0507153	GNPTAB	black
ENSG00000111671	-0.882595	-0.909323	0.0237057	-0.252476	0.930664	0.84005	0.302204	0.11386	SPSB2	black
ENSG00000111674	0.782223	0.335755	-0.0860909	-0.530229	-0.539822	-0.750084	0.0172754	0.696005	ENO2	blue
ENSG00000111676	-0.747188	-0.284714	0.320987	0.480875	0.420398	0.76294	-0.234285	-0.559234	ATN1	greenyellow
ENSG00000111678	0.465736	0.171827	-0.00809431	-0.384963	-0.302082	-0.47128	0.0677042	0.497919	C12orf57	blue
ENSG00000111684	0.870599	0.821192	-0.168716	0.18795	-0.840951	-0.838959	-0.184751	-0.080231	LPCAT3	blue
ENSG00000111700	0.883697	0.302891	-0.485125	-0.56141	-0.451299	-0.895035	0.338743	0.64217	SLCO1B3	blue
ENSG00000111707	0.498698	-0.152892	-0.928773	-0.574547	0.114855	-0.58576	0.817694	0.478666	SUDS3	blue
ENSG00000111711	-0.795808	-0.796387	-0.114003	-0.141215	0.869388	0.736696	0.374652	-0.0440016	GOLT1B	black
ENSG00000111727	-0.535953	-0.788624	-0.523642	-0.322437	0.859034	0.438399	0.70446	0.108172	HCFC2	black
ENSG00000111731	0.635501	0.00195327	-0.890504	-0.534573	-0.0474587	-0.710721	0.734957	0.47459	C2CD5	blue
ENSG00000111737	-0.857698	-0.384441	0.374653	0.443026	0.509664	0.862627	-0.234528	-0.525924	RAB35	greenyellow
ENSG00000111785	0.76221	0.707838	0.0559507	0.0561374	-0.785971	-0.721835	-0.274544	0.103781	RIC8B	blue
ENSG00000111786	0.950374	0.793122	-0.162593	0.0241209	-0.857185	-0.924043	-0.124305	0.118111	SRSF9	blue
ENSG00000111802	-0.765578	-0.414667	0.721432	0.0984375	0.385531	0.822966	-0.456884	-0.07764	TDP2	greenyellow
ENSG00000111832	-0.0343657	-0.331945	-0.681507	-0.223867	0.397507	-0.0343492	0.612469	0.0537602	RWDD1	black
ENSG00000143545	-0.177281	-0.83309	-0.651513	-0.85985	0.751918	0.0816157	0.884298	0.725801	RAB13	darkgrey
ENSG00000111845	-0.0820666	0.617248	0.591944	0.903234	-0.484669	0.161341	-0.774808	-0.829307	PAK1IP1	midnightblue
ENSG00000111850	0.617346	0.103631	-0.765401	-0.392518	-0.122941	-0.683556	0.623202	0.33258	SMIM8	blue
ENSG00000113407	-0.573999	0.0866005	0.843656	0.60506	-0.0261662	0.653068	-0.760858	-0.550577	TARS	darkturquoise
ENSG00000111875	-0.512012	0.137516	0.565855	0.740864	-0.00795854	0.565667	-0.598366	-0.729391	ASF1A	greenyellow
ENSG00000111880	0.700764	0.911211	0.0548503	0.481063	-0.867213	-0.667459	-0.375279	-0.389668	RNGTT	cyan
ENSG00000111897	0.0120474	-0.595279	-0.228514	-0.918966	0.401633	-0.0364645	0.473905	0.922856	SERINC1	darkorange
ENSG00000111906	0.162887	0.701703	0.6994	0.635921	-0.676924	-0.0671253	-0.828011	-0.485924	HDDC2	cyan
ENSG00000111961	-0.662836	-0.877269	-0.419013	-0.325747	0.936087	0.580549	0.629385	0.129158	SASH1	black
ENSG00000111981	-0.622164	-0.561821	0.464459	-0.24211	0.474191	0.655219	-0.174532	0.249779	ULBP1	greenyellow
ENSG00000112029	0.813411	0.94594	0.202702	0.318605	-0.984965	-0.750844	-0.489553	-0.141547	FBXO5	cyan
ENSG00000112031	0.616403	0.770233	0.276067	0.291318	-0.811972	-0.558936	-0.463116	-0.122892	MTRF1L	cyan
ENSG00000112033	-0.324716	0.0739512	-0.00765071	0.604033	0.123548	0.299966	-0.0548904	-0.718071	PPARD	greenyellow
ENSG00000112039	-0.510476	0.218669	0.542343	0.865863	-0.0475938	0.552217	-0.612092	-0.892736	FANCE	midnightblue
ENSG00000112062	0.0788226	0.2395	-0.232708	0.386154	-0.0963782	-0.120516	0.102612	-0.477852	MAPK14	blue
ENSG00000112078	-0.682314	-0.82843	-0.31743	-0.276837	0.888675	0.609726	0.531204	0.077682	KCTD20	black
ENSG00000112079	-0.334925	-0.60769	-0.634465	-0.262517	0.685898	0.242989	0.689276	0.0636883	STK38	black
ENSG00000112081	0.240466	0.853792	0.694478	0.784385	-0.806136	-0.137767	-0.911655	-0.620963	SRSF3	cyan
ENSG00000112096	-0.789896	-0.797779	0.0784383	-0.225043	0.820934	0.743105	0.27785	0.0995759	SOD2	black
ENSG00000112110	-0.707058	-0.00757305	0.643018	0.735957	0.156898	0.745879	-0.566464	-0.754265	MRPL18	greenyellow
ENSG00000112118	0.713757	0.972933	0.208589	0.50722	-0.952039	-0.654653	-0.522291	-0.356103	MCM3	cyan
ENSG00000112139	-0.601131	-0.725364	-0.328687	-0.205021	0.801412	0.533915	0.515784	0.035074	MDGA1	black
ENSG00000112144	0.727379	0.15517	-0.711832	-0.491718	-0.231464	-0.765309	0.523737	0.494654	ICK	blue
ENSG00000112149	0.220982	0.0182031	-0.354662	-0.128236	0.00913542	-0.286354	0.380947	0.094215	CD83	blue
ENSG00000112183	-0.731262	-0.505536	-0.0994288	0.258063	0.662338	0.67789	0.202294	-0.435116	RBM24	greenyellow
ENSG00000112186	-0.585821	-0.43473	-0.0504309	0.12576	0.528187	0.570003	0.089489	-0.271682	CAP2	black
ENSG00000112200	-0.715307	-0.503115	0.410211	0.0248009	0.506901	0.729167	-0.154238	-0.0607601	ZNF451	greenyellow
ENSG00000112234	-0.568924	-0.581993	0.386777	-0.335265	0.491238	0.586833	-0.074081	0.327736	FBXL4	greenyellow
ENSG00000112242	0.517677	0.872712	0.428416	0.526109	-0.86352	-0.453662	-0.634568	-0.366464	E2F3	cyan
ENSG00000112245	-0.801215	-0.422345	0.396017	0.288465	0.50386	0.816249	-0.218407	-0.340624	PTP4A1	greenyellow
ENSG00000112290	0.873126	0.369416	-0.471958	-0.434825	-0.489348	-0.890629	0.304742	0.521265	WASF1	blue
ENSG00000112294	0.78312	0.498286	-0.570693	-0.0571037	-0.491988	-0.807871	0.264417	0.0766644	ALDH5A1	blue
ENSG00000112304	-0.763183	-0.866913	-0.209315	-0.250744	0.920154	0.6942	0.478367	0.078752	ACOT13	black
ENSG00000112305	-0.0822952	-0.403569	0.153577	-0.620537	0.21709	0.109582	0.0484699	0.6797	SMAP1	darkorange
ENSG00000112306	-0.69463	-0.881851	0.0592183	-0.49189	0.810987	0.66728	0.284484	0.419948	RPS12	black
ENSG00000112308	-0.850331	-0.661297	0.492093	-0.085269	0.641881	0.867259	-0.13954	0.0549548	C6orf62	greenyellow
ENSG00000112312	0.820406	0.921763	-0.00971931	0.358514	-0.915746	-0.776791	-0.346092	-0.226643	GMNN	cyan
ENSG00000163701	0.356226	-0.369493	-0.847937	-0.761122	0.289734	-0.452974	0.88413	0.674668	IL17RE	darkgrey
ENSG00000112339	-0.847084	-0.475054	0.495112	0.209712	0.524947	0.873288	-0.286487	-0.262599	HBS1L	greenyellow
ENSG00000112365	-0.457986	0.187494	0.499325	0.761661	-0.0371932	0.509592	-0.556163	-0.781451	ZBTB24	greenyellow
ENSG00000112367	-0.0339833	-0.0899382	0.419331	-0.262655	-0.0621151	0.0991266	-0.288829	0.395037	FIG4	darkorange
ENSG00000112378	-0.416077	-0.893889	-0.267669	-0.777869	0.781732	0.359386	0.580558	0.691624	PERP	black
ENSG00000112379	-0.153278	-0.115105	0.66315	-0.256424	-0.0567036	0.235513	-0.456099	0.412031	KIAA1244	blue
ENSG00000112406	-0.871171	-0.928696	-0.0517868	-0.273451	0.956914	0.824789	0.356729	0.117038	HECA	black
ENSG00000112414	0.72804	0.165622	-0.862984	-0.411348	-0.191043	-0.797798	0.64981	0.361798	GPR126	blue
ENSG00000112541	0.752014	0.828078	0.326223	0.158573	-0.918949	-0.680587	-0.506462	0.0476322	PDE10A	blue
ENSG00000112578	-0.687333	-0.0191544	0.625332	0.704157	0.155656	0.741284	-0.572572	-0.715962	BYSL	greenyellow
ENSG00000112624	-0.849653	-0.658395	0.257813	0.0130422	0.702727	0.854164	-0.0249513	-0.117233	GLTSCR1L	greenyellow
ENSG00000112651	-0.573871	0.125395	0.650855	0.764352	0.012152	0.624872	-0.628264	-0.760258	MRPL2	greenyellow
ENSG00000112655	0.956436	0.681449	-0.388668	-0.0750811	-0.731483	-0.96019	0.096168	0.162601	PTK7	blue
ENSG00000112658	0.201683	0.729507	0.237506	0.83397	-0.578747	-0.151739	-0.520525	-0.801015	SRF	cyan
ENSG00000112667	0.657766	0.118263	-0.823963	-0.397547	-0.13239	-0.742167	0.686092	0.348657	DNPH1	blue
ENSG00000112679	-0.780526	-0.867903	-0.236394	-0.218918	0.932606	0.719624	0.464658	0.0370694	DUSP22	black
ENSG00000112685	-0.800239	-0.54212	0.00987647	0.242819	0.687902	0.766937	0.121521	-0.407461	EXOC2	greenyellow
ENSG00000112695	0.478411	0.0923025	-0.820155	-0.193946	-0.0389769	-0.565719	0.634186	0.0917677	COX7A2	blue
ENSG00000112697	0.726435	0.276499	-0.807373	-0.244461	-0.268272	-0.788827	0.559856	0.192133	TMEM30A	blue
ENSG00000112701	-0.467911	-0.564991	-0.167408	-0.189297	0.584573	0.451342	0.27173	0.0665908	SENP6	black
ENSG00000112715	-0.0143518	-0.142307	0.506813	-0.437092	-0.0625418	0.0822167	-0.303257	0.58771	VEGFA	blue
ENSG00000112742	0.751783	0.920076	0.227503	0.357019	-0.945883	-0.687702	-0.50426	-0.188012	TTK	cyan
ENSG00000112759	0.871601	0.877829	-0.157042	0.274321	-0.872003	-0.840222	-0.209058	-0.17368	SLC29A1	cyan
ENSG00000112773	0.926121	0.704451	-0.264197	-0.0461612	-0.770664	-0.899345	-0.0446679	0.150122	FAM46A	blue
ENSG00000112812	0.412099	-0.28319	-0.584287	-0.81714	0.129492	-0.456261	0.619683	0.806767	PRSS16	darkorange
ENSG00000112893	-0.759528	-0.889997	-0.118397	-0.3369	0.903547	0.716375	0.405364	0.178058	MAN2A1	black
ENSG00000112941	0.890764	0.644897	-0.0199459	-0.202563	-0.783964	-0.8524	-0.152425	0.381937	PAPD7	blue
ENSG00000112972	-0.935803	-0.647618	0.478643	0.0614159	0.674178	0.947293	-0.169654	-0.123685	HMGCS1	greenyellow
ENSG00000112977	-0.808844	-0.870221	-0.216566	-0.186815	0.949052	0.736351	0.485479	0.00191507	DAP	black
ENSG00000112981	-0.0627897	-0.493132	-0.698543	-0.432074	0.510011	-0.0131887	0.705489	0.287371	NME5	black
ENSG00000112984	0.880703	0.920181	-0.0217008	0.278694	-0.937854	-0.837733	-0.309466	-0.144358	KIF20A	cyan
ENSG00000111371	-0.669938	-0.154325	0.84256	0.34866	0.164054	0.736187	-0.623341	-0.296998	SLC38A1	darkturquoise
ENSG00000113048	0.559278	0.353979	-0.621639	0.0519363	-0.286166	-0.600579	0.343645	-0.0872363	MRPS27	blue
ENSG00000113070	-0.734381	-0.788005	0.0230126	-0.258178	0.799889	0.686528	0.31374	0.137648	HBEGF	black
ENSG00000104960	-0.20595	-0.714537	-0.728296	-0.595056	0.721064	0.0942155	0.884081	0.40491	PTOV1	darkgrey
ENSG00000113119	0.821216	0.311	-0.644122	-0.392789	-0.382294	-0.86711	0.453973	0.404232	TMCO6	blue
ENSG00000113140	0.749451	0.438282	-0.445904	-0.167361	-0.462021	-0.777078	0.271848	0.186358	SPARC	blue
ENSG00000113161	-0.801654	-0.909916	-0.232414	-0.266077	0.965348	0.734386	0.489067	0.0783277	HMGCR	black
ENSG00000113163	-0.830292	-0.935053	-0.0776212	-0.332166	0.950463	0.783816	0.384975	0.182781	COL4A3BP	black
ENSG00000113194	-0.519421	0.1766	0.735884	0.715554	-0.066282	0.581495	-0.708936	-0.673841	FAF2	greenyellow
ENSG00000113269	0.581486	0.0148126	-0.561586	-0.576301	-0.133468	-0.603221	0.446906	0.595882	RNF130	blue
ENSG00000113282	-0.828601	-0.559567	0.301549	0.127894	0.627096	0.816982	-0.058648	-0.204545	CLINT1	greenyellow
ENSG00000166889	-0.453212	-0.0704573	0.841561	0.167167	0.00852553	0.542516	-0.659628	-0.0583644	PATL1	darkturquoise
ENSG00000003436	0.301605	-0.264489	-0.945302	-0.477546	0.287762	-0.411094	0.882585	0.329994	TFPI	darkgrey
ENSG00000113368	0.877794	0.924619	-0.0506301	0.298276	-0.933476	-0.837414	-0.304605	-0.165021	LMNB1	cyan
ENSG00000113369	-0.402326	-0.763613	0.00909976	-0.697059	0.617956	0.394041	0.295007	0.681856	ARRDC3	black
ENSG00000113384	-0.771698	-0.845863	-0.308861	-0.166058	0.940697	0.690952	0.533797	-0.0397164	GOLPH3	black
ENSG00000113387	0.836919	0.661131	-0.388428	0.0612621	-0.661204	-0.838713	0.0799078	-0.000632054	SUB1	blue
ENSG00000110660	-0.0139952	0.618573	0.841133	0.694208	-0.591205	0.111149	-0.914376	-0.536315	SLC35F2	darkturquoise
ENSG00000113460	0.438002	0.852063	0.212005	0.714191	-0.756266	-0.390574	-0.514739	-0.616088	BRIX1	cyan
ENSG00000167566	-0.355582	0.0113043	0.840572	0.177981	-0.0827191	0.453667	-0.685714	-0.0389372	NCKAP5L	darkturquoise
ENSG00000113552	-0.971997	-0.680174	0.351446	0.115596	0.745636	0.971621	-0.0805278	-0.217646	GNPDA1	greenyellow
ENSG00000113558	0.818784	0.912759	0.0214982	0.333328	-0.91878	-0.767833	-0.362313	-0.200121	SKP1	cyan
ENSG00000113569	0.405181	0.896044	0.531051	0.684919	-0.863138	-0.320003	-0.783552	-0.530905	NUP155	cyan
ENSG00000113575	-0.502199	0.239914	0.675267	0.839949	-0.0943551	0.572098	-0.713854	-0.82465	PPP2CA	greenyellow
ENSG00000113580	-0.612526	-0.955758	-0.423487	-0.532519	0.960798	0.531011	0.693406	0.349553	NR3C1	black
ENSG00000113583	0.930954	0.431064	-0.464695	-0.428586	-0.554835	-0.936404	0.255266	0.522086	C5orf15	blue
ENSG00000113594	0.832734	0.709889	-0.256653	0.0930399	-0.72097	-0.814844	-0.0373644	-0.021227	LIFR	blue
ENSG00000113615	-0.356465	-0.701237	-0.150888	-0.602267	0.626359	0.309719	0.458048	0.525136	SEC24A	black
ENSG00000113621	-0.170917	-0.564323	-0.630216	-0.437432	0.571024	0.0935092	0.664027	0.280243	TXNDC15	black
ENSG00000113643	-0.769163	-0.678891	-0.114348	0.0238064	0.792521	0.70549	0.321202	-0.203747	RARS	black
ENSG00000113648	0.434751	0.871366	0.208592	0.739281	-0.760745	-0.391753	-0.516317	-0.658099	H2AFY	cyan
ENSG00000113712	-0.739722	-0.660729	0.392442	-0.205359	0.607009	0.764797	-0.100027	0.165828	CSNK1A1	greenyellow
ENSG00000113716	-0.753194	-0.269322	0.41547	0.457206	0.384888	0.776353	-0.312143	-0.551922	HMGXB3	greenyellow
ENSG00000113719	0.688332	0.218145	-0.747473	-0.306946	-0.222136	-0.758169	0.587285	0.268352	ERGIC1	blue
ENSG00000113732	-0.561854	-0.836306	-0.546923	-0.355997	0.90318	0.463874	0.726193	0.146148	ATP6V0E1	black
ENSG00000113734	-0.891341	-0.767103	0.126782	-0.0436772	0.829767	0.854197	0.172976	-0.0737905	BNIP1	greenyellow
ENSG00000113742	-0.866726	-0.713554	0.40752	-0.121223	0.697035	0.869534	-0.0694126	0.0564986	CPEB4	greenyellow
ENSG00000113758	-0.741663	-0.282626	0.41425	0.41851	0.391327	0.763663	-0.294125	-0.484109	DBN1	greenyellow
ENSG00000113810	0.785628	0.958917	0.111874	0.413779	-0.95326	-0.733348	-0.445647	-0.269807	SMC4	cyan
ENSG00000113812	-0.836746	-0.599054	0.385981	0.043184	0.627522	0.844578	-0.117644	-0.123313	ACTR8	greenyellow
ENSG00000113845	-0.2799	0.15422	0.476178	0.466684	-0.103687	0.348779	-0.52823	-0.446504	TIMMDC1	greenyellow
ENSG00000113916	0.501514	0.0565501	-0.131736	-0.588701	-0.232016	-0.49487	0.150283	0.669346	BCL6	blue
ENSG00000113966	0.838237	0.72368	-0.0536631	0.0295159	-0.800016	-0.789964	-0.225398	0.12253	ARL6	blue
ENSG00000113971	0.409502	-0.228627	-0.375709	-0.80815	0.0431992	-0.434504	0.455932	0.859443	NPHP3	darkorange
ENSG00000114019	0.755597	0.938109	0.0789191	0.444084	-0.922223	-0.699506	-0.432269	-0.321236	AMOTL2	cyan
ENSG00000114021	-0.26003	-0.833452	-0.428306	-0.836475	0.726313	0.188744	0.710267	0.747537	NIT2	black
ENSG00000114023	0.942287	0.528593	-0.229942	-0.376809	-0.682832	-0.922594	0.0542302	0.524292	FAM162A	blue
ENSG00000114030	-0.608523	0.0959218	0.714759	0.733671	0.0261201	0.66213	-0.656811	-0.729891	KPNA1	greenyellow
ENSG00000114107	0.859684	0.547152	-0.560879	-0.0886182	-0.562692	-0.888812	0.264343	0.114835	CEP70	blue
ENSG00000114120	0.81212	0.383176	-0.1364	-0.47138	-0.564716	-0.780627	0.0331089	0.625348	SLC25A36	blue
ENSG00000114125	-0.577681	-0.899149	-0.465135	-0.465106	0.919689	0.498915	0.684759	0.274476	RNF7	black
ENSG00000114126	-0.773467	-0.308937	0.440926	0.41654	0.416373	0.781871	-0.275584	-0.467828	TFDP2	greenyellow
ENSG00000119718	-0.265051	0.489022	0.839933	0.839799	-0.403211	0.362747	-0.927381	-0.735432	EIF2B2	darkturquoise
ENSG00000114268	0.84659	0.525462	0.00390817	-0.344532	-0.704086	-0.800795	-0.132598	0.531806	PFKFB4	blue
ENSG00000148908	-0.200932	-0.839654	-0.664879	-0.827163	0.76759	0.105209	0.882505	0.680691	RGS10	darkgrey
ENSG00000114315	-0.899276	-0.527337	0.475368	0.221483	0.5956	0.901797	-0.186116	-0.279257	HES1	greenyellow
ENSG00000114346	0.809712	0.900605	-0.108898	0.381899	-0.866553	-0.777367	-0.257381	-0.283097	ECT2	cyan
ENSG00000114353	0.612514	-0.113857	-0.885129	-0.6929	0.0324308	-0.691039	0.804965	0.641212	GNAI2	blue
ENSG00000114354	-0.743478	-0.917147	-0.0683972	-0.425115	0.903144	0.689578	0.42527	0.305471	TFG	black
ENSG00000182179	0.130438	-0.50888	-0.852287	-0.677106	0.474121	-0.224769	0.88174	0.543979	UBA7	darkgrey
ENSG00000114416	-0.840602	-0.846928	0.165351	-0.274774	0.831331	0.82679	0.154601	0.182765	FXR1	greenyellow
ENSG00000114480	0.965744	0.660696	-0.155671	-0.224663	-0.791429	-0.934548	-0.0673399	0.381839	GBE1	blue
ENSG00000114491	0.540041	0.787454	-0.0169084	0.540253	-0.707269	-0.515296	-0.323713	-0.481043	UMPS	cyan
ENSG00000114503	0.873945	0.769637	-0.100478	0.0645614	-0.825322	-0.84376	-0.17107	0.0522461	NCBP2	blue
ENSG00000114529	-0.907266	-0.481301	0.280935	0.388227	0.626387	0.896744	-0.105138	-0.515549	C3orf52	greenyellow
ENSG00000114544	-0.658582	-0.620793	0.022469	-0.102319	0.647459	0.635001	0.148322	-0.00689898	SLC41A3	black
ENSG00000114626	-0.61761	-0.836962	-0.0313379	-0.480909	0.790398	0.580647	0.381198	0.409007	ABTB1	black
ENSG00000114631	0.773527	0.606117	-0.375991	0.0668396	-0.592154	-0.791046	0.136449	-0.0270282	PODXL2	blue
ENSG00000114646	0.846338	0.636292	0.0823832	-0.197679	-0.789346	-0.791823	-0.242626	0.390347	CSPG5	blue
ENSG00000114648	-0.734097	-0.138905	0.372112	0.668358	0.322343	0.746077	-0.318896	-0.773673	KLHL18	greenyellow
ENSG00000114670	-0.559012	-0.747463	-0.289197	-0.329465	0.777126	0.508826	0.475336	0.174452	NEK11	black
ENSG00000114686	-0.125372	0.423829	0.204072	0.806207	-0.243001	0.133547	-0.380835	-0.830722	MRPL3	midnightblue
ENSG00000114735	-0.663819	-0.752361	0.133341	-0.347664	0.697076	0.651872	0.152371	0.28626	HEMK1	black
ENSG00000114738	-0.787307	-0.302004	0.604855	0.369498	0.365407	0.832079	-0.445347	-0.401184	MAPKAPK3	greenyellow
ENSG00000114742	-0.354521	-0.589429	-0.404806	-0.289975	0.619826	0.278771	0.542708	0.175378	WDR48	black
ENSG00000114767	-0.319144	0.435684	0.702717	0.897697	-0.297518	0.383236	-0.765043	-0.829482	RRP9	midnightblue
ENSG00000114779	0.654007	0.464031	0.259269	-0.278377	-0.651056	-0.588348	-0.30725	0.488807	ABHD14B	blue
ENSG00000114784	-0.948831	-0.582726	0.456284	0.202105	0.645771	0.9631	-0.207801	-0.27265	EIF1B	greenyellow
ENSG00000114796	-0.80025	-0.943287	-0.0154747	-0.417124	0.922266	0.756383	0.361564	0.294852	KLHL24	black
ENSG00000114850	-0.802483	-0.402031	0.60035	0.228806	0.426079	0.84425	-0.388335	-0.255396	SSR3	greenyellow
ENSG00000114853	-0.719069	-0.830485	-0.261131	-0.24347	0.884177	0.66181	0.457346	0.0532185	ZBTB47	black
ENSG00000114859	0.787486	0.808788	0.0954759	0.175596	-0.865507	-0.7385	-0.356164	-0.00962847	CLCN2	cyan
ENSG00000114867	-0.545263	0.123011	0.516145	0.784395	0.041965	0.577557	-0.511259	-0.814808	EIF4G1	greenyellow
ENSG00000114902	0.725783	0.855606	-0.0747262	0.411846	-0.821784	-0.685298	-0.306305	-0.324827	SPCS1	cyan
ENSG00000114933	-0.813587	-0.685741	0.227998	-0.0873568	0.71291	0.802358	0.0538805	-0.0160391	INO80D	greenyellow
ENSG00000114942	-0.86404	-0.28151	0.69084	0.483322	0.371095	0.907357	-0.497532	-0.510649	EEF1B2	greenyellow
ENSG00000114956	-0.313246	-0.364103	-0.531225	0.0742745	0.506226	0.218008	0.517983	-0.251217	DGUOK	black
ENSG00000114978	0.55433	0.629892	-0.185631	0.327664	-0.559801	-0.555186	-0.0659102	-0.309439	MOB1A	blue
ENSG00000114982	-0.677108	-0.142284	0.568869	0.502422	0.227923	0.725618	-0.49944	-0.515408	KANSL3	greenyellow
ENSG00000114993	0.879673	0.433087	-0.363586	-0.388521	-0.567749	-0.874504	0.160264	0.49949	RTKN	blue
ENSG00000114999	-0.902011	-0.678695	0.0138442	0.166099	0.811056	0.861534	0.177196	-0.335848	TTL	greenyellow
ENSG00000115009	-0.101912	-0.212199	-0.0596653	-0.178007	0.20301	0.0562971	0.233937	0.156084	CCL20	black
ENSG00000115020	-0.624913	-0.413565	-0.0826925	0.241748	0.560592	0.583388	0.172009	-0.426481	PIKFYVE	black
ENSG00000115041	-0.742463	-0.84836	-0.355293	-0.192076	0.944915	0.658201	0.577503	-0.0179085	KCNIP3	black
ENSG00000115053	0.529406	0.976915	0.444387	0.677409	-0.939945	-0.446723	-0.741489	-0.515362	NCL	cyan
ENSG00000137203	0.422553	-0.191098	-0.973108	-0.517632	0.193317	-0.527482	0.880162	0.394828	TFAP2A	darkgrey
ENSG00000115084	0.675614	-0.00053668	-0.532684	-0.752462	-0.16608	-0.709407	0.49834	0.795462	SLC35F5	blue
ENSG00000115091	-0.817167	-0.70119	-0.0802746	0.0393558	0.805178	0.765233	0.26622	-0.207677	ACTR3	greenyellow
ENSG00000115107	-0.604571	-0.0268495	0.233786	0.731795	0.239512	0.595085	-0.240808	-0.841214	STEAP3	greenyellow
ENSG00000115128	0.289537	0.790527	0.287946	0.77964	-0.676222	-0.231772	-0.586671	-0.705298	SF3B6	cyan
ENSG00000115129	-0.665831	-0.987989	-0.218217	-0.594172	0.945965	0.601249	0.567254	0.459139	TP53I3	black
ENSG00000115145	-0.777642	-0.536999	-0.0187326	0.232047	0.677995	0.736416	0.151783	-0.40543	STAM2	black
ENSG00000115163	0.624303	0.963459	0.381936	0.54456	-0.958721	-0.551506	-0.65833	-0.36796	CENPA	cyan
ENSG00000115170	-0.901362	-0.479912	0.619818	0.233166	0.518742	0.927724	-0.348398	-0.269565	ACVR1	greenyellow
ENSG00000115204	-0.407543	-0.582269	-0.39408	-0.210597	0.646993	0.319159	0.565063	0.0612077	MPV17	black
ENSG00000115216	-0.985105	-0.657573	0.364182	0.166061	0.736292	0.984124	-0.0988391	-0.274453	NRBP1	greenyellow
ENSG00000115226	-0.834408	-0.9326	-0.0529633	-0.3292	0.942358	0.789805	0.369803	0.19383	FNDC4	black
ENSG00000115233	0.118031	0.760455	0.662229	0.818629	-0.684964	-0.019746	-0.865774	-0.697837	PSMD14	cyan
ENSG00000115234	-0.203277	-0.232918	-0.580192	0.156493	0.390363	0.12704	0.47241	-0.346208	SNX17	black
ENSG00000115241	0.142348	0.7948	0.453121	0.932215	-0.656119	-0.0730937	-0.729967	-0.851508	PPM1G	midnightblue
ENSG00000115255	0.701834	0.440028	-0.575761	-0.0261944	-0.422619	-0.745463	0.309506	0.0414317	REEP6	blue
ENSG00000115266	-0.664554	-0.717182	-0.229431	-0.139479	0.790779	0.615509	0.401339	-0.0419253	APC2	black
ENSG00000115267	-0.607998	-0.700758	0.19528	-0.381646	0.64565	0.585754	0.171281	0.341822	IFIH1	black
ENSG00000115268	-0.644883	-0.866779	-0.301955	-0.386668	0.896746	0.561023	0.594287	0.226591	RPS15	black
ENSG00000139620	-0.273276	0.287942	0.838663	0.520224	-0.288218	0.375612	-0.830691	-0.40727	KANSL2	darkturquoise
ENSG00000115274	-0.854618	-0.814077	-0.0520944	-0.112735	0.885811	0.800936	0.319603	-0.056091	INO80B	greenyellow
ENSG00000115275	0.478107	0.319195	-0.50492	0.0570364	-0.252005	-0.533933	0.337448	-0.103076	MOGS	blue
ENSG00000182670	-0.26981	-0.808537	-0.647429	-0.68967	0.787604	0.161586	0.879858	0.521392	TTC3	darkgrey
ENSG00000115289	-0.840648	-0.769798	-0.0567857	-0.0491282	0.854687	0.78529	0.304676	-0.126468	PCGF1	greenyellow
ENSG00000115295	-0.757866	-0.66209	0.227468	-0.124879	0.669981	0.742026	0.0603009	0.021758	CLIP4	black
ENSG00000115306	-0.0541201	-0.0643879	-0.609738	0.23184	0.237548	-0.023759	0.449511	-0.403184	SPTBN1	blue
ENSG00000115307	-0.939739	-0.411911	0.519672	0.449875	0.527306	0.957195	-0.327766	-0.527631	AUP1	greenyellow
ENSG00000115310	-0.869605	-0.613566	0.251318	0.133401	0.690384	0.868778	-0.0301939	-0.228725	RTN4	greenyellow
ENSG00000115317	-0.785811	-0.757062	-0.0967416	-0.0874285	0.83308	0.734892	0.328789	-0.0948599	HTRA2	black
ENSG00000115355	0.683059	0.180351	-0.69915	-0.380524	-0.226944	-0.732471	0.508733	0.365867	CCDC88A	blue
ENSG00000115364	0.815547	0.85966	-0.0921007	0.297079	-0.855232	-0.780995	-0.258459	-0.182125	MRPL19	blue
ENSG00000115365	0.653816	0.28433	-0.775609	-0.139239	-0.244481	-0.71161	0.513707	0.0841895	LANCL1	blue
ENSG00000136877	-0.337947	0.32651	0.838601	0.687538	-0.263642	0.426947	-0.816344	-0.581142	FPGS	darkturquoise
ENSG00000115392	0.925159	0.644837	-0.296782	-0.13227	-0.71301	-0.925087	0.0743494	0.231523	FANCL	blue
ENSG00000115421	-0.531275	-0.789502	-0.508626	-0.338904	0.85527	0.439663	0.69022	0.118016	PAPOLG	black
ENSG00000115425	0.942866	0.543194	-0.46149	-0.257378	-0.626536	-0.951539	0.211328	0.330952	PECR	blue
ENSG00000115457	0.757476	0.817382	0.184713	0.195442	-0.876736	-0.687231	-0.433296	-0.0185659	IGFBP2	cyan
ENSG00000115459	-0.747918	-0.630379	-0.131599	0.0846862	0.755783	0.701127	0.290392	-0.258203	ELMOD3	black
ENSG00000115484	0.0794864	0.756957	0.629339	0.881126	-0.66199	0.00868318	-0.857868	-0.768943	CCT4	midnightblue
ENSG00000115486	0.876287	0.439837	-0.604348	-0.275107	-0.483755	-0.919756	0.390655	0.306774	GGCX	blue
ENSG00000115539	-0.602307	-0.658762	-0.354493	-0.0769129	0.759921	0.52145	0.487515	-0.118453	PDCL3	black
ENSG00000115540	0.922781	0.817322	-0.136442	0.0870597	-0.861852	-0.898119	-0.155029	0.044988	MOB4	blue
ENSG00000115541	0.707229	0.713814	-0.343009	0.318308	-0.635083	-0.72732	0.0351758	-0.295518	HSPE1	blue
ENSG00000115548	0.560251	0.15717	0.0564029	-0.569646	-0.375287	-0.515321	-0.0470613	0.741055	KDM3A	blue
ENSG00000115561	-0.557309	-0.889974	-0.279387	-0.559204	0.861223	0.487056	0.601315	0.423557	CHMP3	black
ENSG00000115568	-0.768994	-0.217575	0.475884	0.544065	0.356969	0.785362	-0.338934	-0.621044	ZNF142	greenyellow
ENSG00000166888	-0.0303513	-0.627489	-0.753474	-0.680515	0.598456	-0.0666435	0.87854	0.547383	STAT6	darkgrey
ENSG00000115641	0.571719	0.370533	-0.340854	-0.051993	-0.363087	-0.611894	0.240463	0.0798342	FHL2	blue
ENSG00000115648	0.412226	0.252959	0.300405	-0.297429	-0.412986	-0.368011	-0.221327	0.471409	MLPH	blue
ENSG00000115649	-0.825024	-0.664056	0.464103	-0.116148	0.632345	0.846026	-0.144245	0.0846293	CNPPD1	greenyellow
ENSG00000221978	-0.00874285	-0.731757	-0.681544	-0.915448	0.621926	-0.0780861	0.878429	0.812143	CCNL2	darkgrey
ENSG00000115657	0.763359	0.234887	-0.220652	-0.613944	-0.432106	-0.752761	0.171164	0.750193	ABCB6	blue
ENSG00000115677	-0.869285	-0.908387	0.0133596	-0.267881	0.924562	0.829875	0.2977	0.128524	HDLBP	black
ENSG00000115738	-0.427425	-0.837966	-0.589888	-0.53442	0.852174	0.335847	0.773405	0.336692	ID2	black
ENSG00000115756	0.750185	0.703436	0.0523141	0.0760165	-0.764223	-0.726454	-0.216513	0.0694371	HPCAL1	blue
ENSG00000115758	-0.778539	-0.25732	0.267678	0.578872	0.431861	0.786318	-0.23377	-0.698105	ODC1	greenyellow
ENSG00000115761	0.235089	0.815865	0.45145	0.831963	-0.707572	-0.159218	-0.718841	-0.72701	NOL10	cyan
ENSG00000115762	-0.887718	-0.767106	-0.0170988	0.00815219	0.86379	0.846174	0.247285	-0.171168	PLEKHB2	greenyellow
ENSG00000115806	-0.91325	-0.692997	0.195265	0.0795048	0.776173	0.896894	0.0630036	-0.209031	GORASP2	greenyellow
ENSG00000115808	-0.771723	-0.506143	0.329753	0.122653	0.554404	0.790795	-0.152141	-0.191687	STRN	greenyellow
ENSG00000115828	0.386675	0.0915732	0.125919	-0.465265	-0.273049	-0.364716	-0.0497993	0.586909	QPCT	blue
ENSG00000115844	-0.795325	-0.348489	0.670701	0.275606	0.387334	0.829448	-0.409723	-0.29498	DLX2	greenyellow
ENSG00000115866	0.778752	0.553839	0.138601	-0.256456	-0.728772	-0.719031	-0.258794	0.454539	DARS	blue
ENSG00000115875	0.415778	0.93896	0.559622	0.729819	-0.894231	-0.327009	-0.810301	-0.566977	SRSF7	cyan
ENSG00000115884	-0.844556	-0.287456	0.472712	0.542432	0.42714	0.854183	-0.326566	-0.615251	SDC1	greenyellow
ENSG00000115902	-0.812521	-0.336246	0.701047	0.315422	0.37563	0.862137	-0.469626	-0.310242	SLC1A4	greenyellow
ENSG00000115942	0.48467	0.880223	0.270218	0.656084	-0.819034	-0.434399	-0.570724	-0.529554	ORC2	cyan
ENSG00000115944	-0.892859	-0.908251	0.0393457	-0.247615	0.929937	0.855429	0.28225	0.102668	COX7A2L	black
ENSG00000115946	-0.315929	0.390386	0.680343	0.826474	-0.263068	0.37074	-0.703102	-0.767049	PNO1	midnightblue
ENSG00000115947	0.822886	0.650486	-0.279217	0.00977121	-0.687826	-0.800543	-0.032209	0.0617877	ORC4	blue
ENSG00000115966	-0.461681	-0.697945	0.0771108	-0.53996	0.593535	0.439005	0.231067	0.492905	ATF2	black
ENSG00000115977	-0.904104	-0.55391	0.584367	0.129438	0.574792	0.936421	-0.296742	-0.163807	AAK1	greenyellow
ENSG00000115993	-0.881629	-0.707691	0.0762088	0.0533923	0.801879	0.849232	0.150849	-0.197802	TRAK2	greenyellow
ENSG00000121858	0.1996	-0.493722	-0.806162	-0.767448	0.419104	-0.296283	0.878423	0.64549	TNFSF10	darkgrey
ENSG00000116005	0.478184	-0.227349	-0.537086	-0.84668	0.061904	-0.510246	0.57223	0.863093	PCYOX1	darkorange
ENSG00000116030	0.917325	0.668093	-0.435902	-0.0237663	-0.693016	-0.927172	0.122483	0.0904002	SUMO1	blue
ENSG00000116032	0.13074	-0.577393	-0.642384	-0.882138	0.454014	-0.199856	0.769639	0.809009	GRIN3B	darkorange
ENSG00000116044	-0.943632	-0.666068	0.46421	0.0527703	0.697256	0.949772	-0.131213	-0.119668	NFE2L2	greenyellow
ENSG00000116062	0.874296	0.906098	0.0141252	0.242164	-0.938332	-0.821846	-0.346274	-0.0946046	MSH6	blue
ENSG00000116095	-0.827197	-0.508241	0.362917	0.187231	0.566318	0.839165	-0.173405	-0.25769	PLEKHA3	greenyellow
ENSG00000116096	0.467304	0.76738	-0.0331069	0.632441	-0.65743	-0.442285	-0.317839	-0.585359	SPR	cyan
ENSG00000107331	0.411537	-0.365656	-0.829371	-0.851403	0.258144	-0.503088	0.878134	0.777757	ABCA2	darkgrey
ENSG00000116120	0.22428	0.770542	0.215765	0.874003	-0.606742	-0.184578	-0.516316	-0.837274	FARSB	cyan
ENSG00000116133	-0.51542	-0.58833	-0.474478	-0.0307338	0.717422	0.431015	0.554	-0.175128	DHCR24	black
ENSG00000116161	0.737635	0.930377	0.201847	0.400378	-0.936401	-0.681578	-0.482425	-0.248581	CACYBP	cyan
ENSG00000116171	0.548894	-0.0132669	-0.849582	-0.457267	-0.0057637	-0.632354	0.724146	0.3738	SCP2	blue
ENSG00000116198	-0.842056	-0.620264	0.266536	0.0628564	0.676772	0.831974	-0.0152067	-0.150607	CEP104	greenyellow
ENSG00000116199	0.138914	-0.203759	-0.629525	-0.274732	0.224775	-0.188985	0.512077	0.164485	FAM20B	blue
ENSG00000116209	0.427168	-0.238321	-0.776898	-0.679343	0.156724	-0.497784	0.737936	0.613642	TMEM59	blue
ENSG00000116212	-0.4539	-0.599792	0.0382201	-0.359863	0.53389	0.467185	0.133565	0.309795	LRRC42	black
ENSG00000116213	-0.2843	-0.389663	-0.58443	0.0133449	0.517272	0.198056	0.544926	-0.203806	WRAP73	black
ENSG00000116221	-0.615457	-0.139133	0.229575	0.565831	0.295497	0.625154	-0.241723	-0.64387	MRPL37	greenyellow
ENSG00000116237	0.166118	0.314323	-0.348417	0.425411	-0.174663	-0.192528	0.0493542	-0.505239	ICMT	blue
ENSG00000116251	0.650318	-0.0620744	-0.882762	-0.66474	-0.0157614	-0.728879	0.78496	0.607339	RPL22	blue
ENSG00000116254	-0.763517	-0.63074	-0.0705266	0.077089	0.733999	0.720681	0.223451	-0.242465	CHD5	black
ENSG00000116260	0.908924	0.420703	-0.349828	-0.461141	-0.573635	-0.903356	0.177646	0.575122	QSOX1	blue
ENSG00000116266	-0.462412	-0.832038	-0.503774	-0.517824	0.839838	0.382334	0.695373	0.340103	STXBP3	black
ENSG00000116285	0.432542	0.346161	0.475749	-0.248777	-0.535628	-0.352792	-0.427869	0.460942	ERRFI1	blue
ENSG00000116288	0.560379	0.761101	-0.223826	0.560538	-0.636188	-0.564848	-0.136065	-0.554633	PARK7	cyan
ENSG00000116337	0.894532	0.48703	-0.417667	-0.299671	-0.576168	-0.914999	0.229368	0.389567	AMPD2	blue
ENSG00000116396	-0.75509	-0.140978	0.560967	0.614422	0.270437	0.793554	-0.484126	-0.661162	KCNC4	greenyellow
ENSG00000116406	-0.781861	-0.71782	-0.225783	0.0225992	0.848987	0.705853	0.415002	-0.223736	EDEM3	black
ENSG00000116455	0.153025	0.709571	0.339449	0.824922	-0.572604	-0.115866	-0.561953	-0.769304	WDR77	cyan
ENSG00000116459	0.398152	0.417227	-0.517136	0.343994	-0.279963	-0.430659	0.195243	-0.422588	ATP5F1	blue
ENSG00000116473	-0.712311	-0.908116	-0.319893	-0.349917	0.953085	0.632382	0.590138	0.164535	RAP1A	black
ENSG00000116478	0.702155	0.447481	-0.648397	0.0164465	-0.393146	-0.753582	0.377365	-0.0482542	HDAC1	blue
ENSG00000116489	0.518658	0.883999	0.318385	0.586472	-0.839006	-0.451799	-0.596106	-0.469846	CAPZA1	cyan
ENSG00000116514	-0.927837	-0.869099	0.0106873	-0.114731	0.93488	0.881174	0.28831	-0.0454135	RNF19B	black
ENSG00000116539	-0.756428	-0.689058	0.0354819	-0.0902078	0.744297	0.727076	0.188555	-0.0502133	ASH1L	black
ENSG00000116560	0.459949	0.922283	0.364386	0.726357	-0.846373	-0.394257	-0.646781	-0.596869	SFPQ	cyan
ENSG00000116574	-0.819196	-0.947509	-0.185449	-0.322247	0.981369	0.757872	0.471186	0.150189	RHOU	black
ENSG00000116584	-0.698286	-0.438297	0.690449	-0.013149	0.384264	0.746055	-0.37304	0.0633038	ARHGEF2	greenyellow
ENSG00000116586	-0.75004	-0.777658	-0.322743	-0.0738801	0.899232	0.668789	0.522337	-0.14088	LAMTOR2	black
ENSG00000116604	-0.944301	-0.696745	0.302253	0.0659133	0.761747	0.932904	-0.0101318	-0.171859	MEF2D	greenyellow
ENSG00000116649	-0.262393	0.271641	0.208514	0.74304	-0.0872513	0.267038	-0.316302	-0.80387	SRM	midnightblue
ENSG00000116661	0.326822	-0.35071	-0.564692	-0.811434	0.202949	-0.371843	0.612975	0.813489	FBXO2	darkorange
ENSG00000116663	-0.884944	-0.860679	0.188133	-0.235951	0.858317	0.858558	0.170861	0.144059	FBXO6	greenyellow
ENSG00000116668	-0.756198	-0.871667	-0.0742204	-0.323445	0.883215	0.715237	0.378869	0.187332	SWT1	black
ENSG00000116670	0.29031	0.627288	-0.0850825	0.673602	-0.477718	-0.276307	-0.245249	-0.677381	MAD2L2	cyan
ENSG00000116675	-0.722138	-0.586147	0.222467	-0.0399189	0.61937	0.715554	0.0334345	-0.05901	DNAJC6	greenyellow
ENSG00000116678	-0.755517	-0.680803	-0.0165235	-0.0378508	0.745355	0.730927	0.189456	-0.102643	LEPR	black
ENSG00000116679	0.852102	0.752428	0.164411	-0.0445132	-0.881731	-0.790588	-0.354508	0.247931	IVNS1ABP	blue
ENSG00000116685	0.968319	0.673889	-0.189765	-0.18588	-0.790372	-0.938454	-0.0519995	0.340187	KIAA2013	blue
ENSG00000116688	-0.577334	-0.0714756	0.183603	0.627532	0.25587	0.579933	-0.228275	-0.736405	MFN2	greenyellow
ENSG00000116691	-0.893569	-0.779449	-0.0917746	0.0266288	0.896528	0.834626	0.320742	-0.222245	MIIP	black
ENSG00000116704	-0.426321	-0.667296	-0.627238	-0.226213	0.769265	0.329408	0.724541	0.00744675	SLC35D1	black
ENSG00000116717	-0.909355	-0.63875	0.529665	0.0200561	0.646519	0.925199	-0.186405	-0.0624076	GADD45A	greenyellow
ENSG00000116731	-0.740634	-0.490627	0.122546	0.189731	0.598064	0.727716	0.0272234	-0.331802	PRDM2	greenyellow
ENSG00000116741	-0.387314	-0.55789	-0.0337093	-0.352531	0.515374	0.33821	0.297772	0.303783	RGS2	black
ENSG00000116747	-0.886412	-0.630557	0.465283	0.0256971	0.645961	0.894669	-0.151082	-0.0791767	TROVE2	greenyellow
ENSG00000116750	0.824087	0.879957	-0.0453976	0.30381	-0.882557	-0.788744	-0.282109	-0.170091	UCHL5	cyan
ENSG00000116761	-0.96134	-0.611725	0.449044	0.17183	0.673246	0.971635	-0.182309	-0.247678	CTH	greenyellow
ENSG00000116786	-0.906154	-0.811653	-0.0141204	-0.0443564	0.894679	0.856386	0.269647	-0.119177	PLEKHM2	greenyellow
ENSG00000116791	0.819051	0.461043	-0.472734	-0.220058	-0.519439	-0.834621	0.23015	0.272402	CRYZ	blue
ENSG00000116830	0.269875	0.775829	0.519828	0.68447	-0.720348	-0.19759	-0.718185	-0.544649	TTF2	cyan
ENSG00000116857	0.811458	0.284843	-0.576806	-0.446119	-0.389653	-0.827956	0.36012	0.503375	TMEM9	blue
ENSG00000116863	0.408579	0.238183	0.338076	-0.328433	-0.43286	-0.338053	-0.310743	0.520557	ADPRHL2	blue
ENSG00000116871	-0.815315	-0.755121	-0.193111	0.000487549	0.871031	0.757692	0.371412	-0.200137	MAP7D1	black
ENSG00000116898	-0.210159	0.330745	0.363091	0.713634	-0.204635	0.258093	-0.516817	-0.700989	MRPS15	midnightblue
ENSG00000116903	-0.912348	-0.650724	0.269373	0.120904	0.722237	0.909873	-0.0352547	-0.226423	EXOC8	greenyellow
ENSG00000116906	0.216121	-0.284493	-0.609938	-0.533017	0.231861	-0.260781	0.565689	0.450491	GNPAT	blue
ENSG00000116918	0.724839	0.391574	-0.377743	-0.241592	-0.45624	-0.744646	0.19982	0.301769	TSNAX	blue
ENSG00000116922	-0.578255	0.156781	0.732935	0.788719	-0.0302441	0.642881	-0.714897	-0.763634	C1orf109	greenyellow
ENSG00000116954	-0.808065	-0.9281	-0.0325356	-0.37598	0.919969	0.765922	0.35416	0.240946	RRAGC	black
ENSG00000116957	-0.732477	-0.211428	0.608254	0.436284	0.288565	0.776568	-0.479015	-0.447914	TBCE	greenyellow
ENSG00000116977	0.629942	0.308311	0.128143	-0.454038	-0.517197	-0.572349	-0.162894	0.63594	LGALS8	blue
ENSG00000116984	0.472453	-0.0626161	-0.156856	-0.720117	-0.146094	-0.456171	0.20164	0.833871	MTR	blue
ENSG00000116985	-0.547453	-0.6185	-0.438772	-0.0476607	0.744895	0.46817	0.54277	-0.148331	BMP8B	black
ENSG00000089327	0.127744	0.570075	0.835214	0.411195	-0.623195	-0.0278215	-0.839378	-0.212374	FXYD5	darkturquoise
ENSG00000116991	-0.708694	-0.469127	0.533124	0.00721209	0.452648	0.743081	-0.260106	-0.0240546	SIPA1L2	greenyellow
ENSG00000117000	0.719322	0.375808	0.0344742	-0.430954	-0.570347	-0.668938	-0.11989	0.592495	RLF	blue
ENSG00000117010	0.287767	0.726795	0.23328	0.698596	-0.624425	-0.230067	-0.522	-0.646803	ZNF684	cyan
ENSG00000117016	-0.797928	-0.782114	-0.201035	-0.0756922	0.880988	0.736005	0.395749	-0.125207	RIMS3	black
ENSG00000117036	-0.731562	-0.613943	0.501575	-0.182046	0.558337	0.746648	-0.13396	0.189728	ETV3	greenyellow
ENSG00000117054	0.71599	0.30202	-0.716389	-0.224925	-0.315397	-0.766226	0.458172	0.189374	ACADM	blue
ENSG00000117118	-0.256145	0.128192	-0.116048	0.645322	0.0828821	0.239609	-0.0389317	-0.751073	SDHB	greenyellow
ENSG00000117133	-0.521083	0.195868	0.684174	0.793038	-0.0653679	0.586153	-0.70013	-0.765029	RPF1	greenyellow
ENSG00000117139	-0.00280183	-0.425905	0.0204363	-0.721085	0.232658	0.00829318	0.198412	0.756581	KDM5B	darkorange
ENSG00000117143	0.787187	0.809894	0.0386923	0.196577	-0.839141	-0.749019	-0.283087	-0.0617424	UAP1	blue
ENSG00000117151	0.629838	0.0897158	-0.622743	-0.495178	-0.166123	-0.678138	0.518284	0.485809	CTBS	blue
ENSG00000117152	0.946189	0.838173	-0.237243	0.134098	-0.857884	-0.928867	-0.0985569	-0.0263896	RGS4	blue
ENSG00000117155	0.498649	0.667402	-0.231309	0.505674	-0.552469	-0.49028	-0.11515	-0.493623	SSX2IP	blue
ENSG00000117174	-0.0907236	0.441778	0.159267	0.79377	-0.265509	0.114255	-0.401688	-0.830829	ZNHIT6	midnightblue
ENSG00000117305	0.0359362	-0.366186	0.0886748	-0.703004	0.16089	-0.00936637	0.1013	0.7819	HMGCL	darkorange
ENSG00000117308	0.868234	0.618488	-0.273852	-0.0961574	-0.677155	-0.872742	0.0723781	0.201037	GALE	blue
ENSG00000117318	0.841884	0.860436	-0.129815	0.278891	-0.862371	-0.805144	-0.245225	-0.163431	ID3	blue
ENSG00000071564	-0.148213	-0.642088	-0.751066	-0.538172	0.659873	0.032762	0.877782	0.360114	TCF3	darkgrey
ENSG00000117360	-0.479596	0.158567	0.711026	0.668608	-0.0721457	0.555131	-0.694167	-0.619475	PRPF3	greenyellow
ENSG00000117362	-0.844793	-0.811385	-0.0334442	-0.123222	0.872814	0.804512	0.281831	-0.0197335	APH1A	greenyellow
ENSG00000117385	0.520476	0.0492687	-0.600785	-0.408837	-0.089603	-0.572142	0.531641	0.35654	P3H1	blue
ENSG00000117394	0.553014	0.278207	0.245523	-0.441098	-0.495709	-0.4912	-0.232955	0.639171	SLC2A1	blue
ENSG00000117395	0.628463	0.991728	0.31163	0.616416	-0.954325	-0.561712	-0.622422	-0.463442	EBNA1BP2	cyan
ENSG00000117399	0.501572	0.965067	0.462565	0.696132	-0.921742	-0.418753	-0.738691	-0.53616	CDC20	cyan
ENSG00000117408	-0.877032	-0.693182	0.140629	0.0342961	0.767098	0.847826	0.0965019	-0.168788	IPO13	greenyellow
ENSG00000117410	-0.910789	-0.431627	0.366969	0.439299	0.568851	0.916551	-0.215073	-0.552999	ATP6V0B	greenyellow
ENSG00000117448	-0.669984	-0.860226	-0.305467	-0.339164	0.903725	0.59312	0.565847	0.169901	AKR1A1	black
ENSG00000117450	0.694922	0.749005	-0.339143	0.396663	-0.653567	-0.706883	-0.00637978	-0.378973	PRDX1	blue
ENSG00000117461	-0.62769	-0.539947	-0.307322	0.144845	0.702012	0.556291	0.406154	-0.344055	PIK3R3	black
[truncated: 4,997 more rows]
